# Supplementary material
Source: PubMed Central journal article supplement (PMC4298241)

## Supporting Information

© Copyright Wiley-VCH Verlag GmbH & Co. KGaA, 69451 Weinheim, 2014

### **Non-natural Acetogenin Analogues as Potent *Trypanosoma brucei* Inhibitors**

Gordon J. Florence,<sup>\*</sup> Andrew L. Fraser, Eoin R. Gould, Elizabeth F. B. King,  
Stefanie K. Menzies, Joanne C. Morris, Lindsay B. Tulloch, and Terry K. Smith<sup>\*[a]</sup>

cmdc\_201402272\_sm\_miscellaneous\_information.pdf

## General experimental

Analytical thin layer chromatography was carried out on Merck Kieselgel 60 F254 plates with visualization by ultraviolet light (254 nm) and/or heating the plate after staining with either a solution of 20% ceric ammonium molybdate w/v in H<sub>2</sub>O or 20% potassium permanganate w/v in H<sub>2</sub>O. Optical rotations were measured with a Perkin-Elmer 341 polarimeter at 589 nm (sodium D line) and concentrations (c) are reported in g/100 mL. Infrared (IR) spectra were recorded on a Perkin-Elmer Paragon series 1000 FTIR spectrophotometer or a Shimadzu IRAffinity-1 fourier transform IR spectrophotometer using Pike MIRacle ATR accessory. Analysis was carried out using Shimadzu IRsolution v1.50. Wavelengths of maximum absorbance ( $\nu_{\text{max}}$ ) are quoted in  $\text{cm}^{-1}$ . Only selected, characteristic IR absorption data are provided for each compound. NMR spectra were recorded using deuteriochloroform (CDCl<sub>3</sub>) as the solvent. Chemical shifts ( $\delta$ ) are given in parts per million (ppm) from tetramethylsilane ( $\delta = 0$ ) and were measured relative to the signal of the solvent in which the sample was analyzed (CDCl<sub>3</sub>:  $\delta$  7.26, <sup>1</sup>H NMR;  $\delta$  77.0, <sup>13</sup>C NMR). Coupling constants ( $J$  values) are given in Hertz (Hz) and are reported to the nearest 0.1 Hz. <sup>1</sup>H NMR spectral data are tabulated in the order: number of protons, multiplicity (br, broad; s, singlet; d, doublet; dd, doublet of doublets; t, triplet; q, quartet; m, multiplet), coupling constant and proton assignment using the numbering shown. HPLC analyses were obtained on a Shimadzu HPLC consisting of a DGU-20A5 degasser, LX-20AT liquid chromatograph, SIL-20AHT autosampler, CMB-20A column oven with variable temperature setting (25–40 °C).

### General procedure A: Copper catalyzed azide-alkyne cycloaddition reactions

To a solution of alkyne (1 eq) and azide (1 eq) in *t*-BuOH (1 mL) and H<sub>2</sub>O (1 mL) was added CuSO<sub>4</sub>·5H<sub>2</sub>O (1.2 eq) and sodium ascorbate (2.4 eq) at RT and the mixture left to stir for 16 h. The reaction mixture was diluted with H<sub>2</sub>O (5 mL) and CH<sub>2</sub>Cl<sub>2</sub> (5 mL). The organics were extracted with CH<sub>2</sub>Cl<sub>2</sub> (3 × 5 mL), dried (Na<sub>2</sub>SO<sub>4</sub>) and concentrated *in vacuo*. Purification by flash column chromatography provided the desired 1,4-triazoles.

### General procedure B: Benzyl ether cleavage

To a solution of benzyl ether (1 eq) in EtOH (4 mL) at RT was added Pd(OH)<sub>2</sub> on carbon (0.2 eq, 20% wt on carbon). The reaction system was purged with H<sub>2</sub> and left under a

positive pressure of H<sub>2</sub>. After 1.5 h, the reaction mixture was filtered through Celite with EtOH (15 mL). The filtrate was concentrated *in vacuo* and purification by flash column chromatography provided the desired alcohols.

The synthesis of **8a**, **9a**, **10a** and **14a** have been described previously.<sup>1</sup>

**(2S)-2-[4-(benzyloxy)butyl] oxirane (10b)**<sup>2</sup>

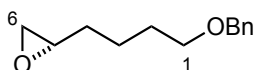

To a suspension of NaH (3.22 g, 60% dispersion in mineral oil, 134 mmol) in THF (140 mL) at 0 °C was added a solution of 5-hexen-1-ol **276** (8.24 mL, 69.9 mmol) in THF (10 mL) *via* cannula. After 5 min, benzyl bromide (10.0 mL, 84.1 mmol) was added and the reaction mixture allowed to warm to RT. After 16 h, the reaction mixture was quenched by slow addition of MeOH (2 mL), followed by addition of saturated aqueous NH<sub>4</sub>Cl (100 mL). The organics were extracted with Et<sub>2</sub>O (3 × 50 mL), washed with H<sub>2</sub>O (50 mL), brine (50 mL), dried (Na<sub>2</sub>SO<sub>4</sub>) and concentrated *in vacuo*. Purification by flash column chromatography (5% EtOAc/Hexane) provided 6-(benzyloxy)-hex-1-ene (13.0 g, 98%) as a colourless oil.

**R<sub>f</sub>** 0.74 (10% EtOAc/Hexane); **<sup>1</sup>H NMR** (300 MHz, CDCl<sub>3</sub>) δ 7.42-7.27 (5H, m, ArH), 5.81 (1H, app ddt, *J* = 16.9, 10.2, 6.7 Hz, H<sub>5</sub>), 5.04-4.92 (2H, m, H<sub>6</sub>), 4.51 (2H, s, OCH<sub>2</sub>Ar), 3.48 (2H, t, *J* = 6.4 Hz, H<sub>1</sub>), 2.11-2.03 (2H, m, H<sub>4</sub>), 1.69-1.56 (2H, m, H<sub>2</sub>), 1.53-1.43 (2H, m, H<sub>3</sub>).

To a solution of 6-(benzyloxy)-hex-1-ene (13.3 g, 69.9 mmol) in CH<sub>2</sub>Cl<sub>2</sub> (200 mL) at 0 °C was added *m*-CPBA (20.5 g, 119 mmol) and the reaction mixture allowed to warm to RT. After 16 h, the reaction mixture was quenched by addition of saturated aqueous NaHCO<sub>3</sub> (150 mL). The organics were extracted with CH<sub>2</sub>Cl<sub>2</sub> (3 × 100 mL), washed with KOH (100 mL), H<sub>2</sub>O (100 mL) and brine (100 mL). The combined organic layers were dried (Na<sub>2</sub>SO<sub>4</sub>), filtered and concentrated *in vacuo*. Purification by flash column chromatography (1→10% EtOAc/Hexane) provided (±)-epoxide **10b** (10.8 g, 75%) as a colourless oil.

**R<sub>f</sub>** 0.3 (10% EtOAc/Hexane); **<sup>1</sup>H NMR** (300 MHz, CDCl<sub>3</sub>) δ 7.38-7.27 (5H, m, ArH), 4.51 (2H, s, OCH<sub>2</sub>Ar), 3.49 (2H, t, *J* = 6.2 Hz, H<sub>1</sub>), 2.94-2.88 (1H, m, H<sub>5</sub>), 2.75 (1H, dd, *J* = 5.0, 4.0 Hz, H<sub>6a</sub>), 2.46 (1H, dd, *J* = 5.0, 2.7 Hz, H<sub>6b</sub>), 1.73-1.51 (6H, m, H<sub>2-4</sub>).

To a suspension of (*S,S*)-Co-salen catalyst<sup>3</sup> (63.0 mg, 0.11 mmol) in toluene (2 mL) at RT was added acetic acid (63.0  $\mu$ L, 1.10 mmol). After 1 h open to air, the solvent was removed under reduced pressure and the brown tar residue was dried under vacuum. To the residue was added ( $\pm$ )-**10b** (10.8 g, 52.4 mmol), the reaction mixture was cooled to 0 °C and water (520  $\mu$ L, 28.8 mmol) was slowly added. After 16 h at RT, purification by flash column chromatography (5% EtOAc/Hexane) provided (*S*)-epoxide **10b** (4.56 g, 42%) as a colourless oil.

**R<sub>f</sub>** 0.3 (10% EtOAc/Hexane);  $[\alpha]_{\text{D}}^{20}$  -5.2 (*c* 2.0, CHCl<sub>3</sub>), lit  $[\alpha]_{\text{D}}^{20}$  -5.1 (*c* 2.0, CHCl<sub>3</sub>)<sup>2</sup>; **<sup>1</sup>H NMR** (300 MHz, CDCl<sub>3</sub>)  $\delta$  7.38-7.27 (5H, m, ArH), 4.51 (2H, s, OCH<sub>2</sub>Ar), 3.49 (2H, t, *J* = 6.2 Hz, H<sub>1</sub>), 2.94-2.88 (1H, m, H<sub>5</sub>), 2.75 (1H, dd, *J* = 5.0, 4.0 Hz, H<sub>6a</sub>), 2.46 (1H, dd, *J* = 5.0, 2.7 Hz, H<sub>6b</sub>), 1.73-1.51 (6H, m, H<sub>2-4</sub>).

**(2*S*)-2-[4-((*tert*-butyldiphenylsilyloxy)butyl) oxirane (**10c**)<sup>4</sup>**

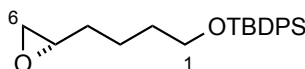

To a suspension of NaH (3.36 g, 60% dispersion in mineral oil, 84.0 mmol) in THF (140 mL) at 0 °C was added a solution of 5-hexen-1-ol (8.4 mL, 70.0 mmol) in THF (10 mL) *via* cannula. After 5 min, benzyl bromide (10.0 mL, 84.0 mmol) was added and the reaction mixture allowed to warm to RT. After 16 h, the reaction mixture was quenched by slow addition of MeOH (2 mL), followed by addition of saturated aqueous NH<sub>4</sub>Cl (100 mL). The organics were extracted with Et<sub>2</sub>O (3  $\times$  50 mL), washed with H<sub>2</sub>O (50 mL), brine (50 mL), dried (Na<sub>2</sub>SO<sub>4</sub>) and concentrated *in vacuo*. Purification by flash column chromatography (0.25 $\rightarrow$ 10% Et<sub>2</sub>O/Hexane) provided 6-((*tert*-butyldiphenylsilyloxy)-hex-1-ene (20.8 g, 87%) as a colourless oil.

**R<sub>f</sub>** 0.81 (10% EtOAc/Hexane); **<sup>1</sup>H NMR** (300 MHz, CDCl<sub>3</sub>)  $\delta$  7.69-7.65 (4H, m, ArH), 7.45-7.35 (6H, m, ArH), 5.80 (1H, app ddt, *J* = 16.9, 10.1, 6.6 Hz, H<sub>5</sub>), 5.01-4.92 (2H, m, H<sub>6</sub>), 3.66 (2H, t, *J* = 6.3 Hz, H<sub>1</sub>), 2.04 (2H, app q, *J* = 7.0 Hz, H<sub>4</sub>), 1.63-1.42 (4H, m, H<sub>2-3</sub>), 1.05 (9H, s, SiC(CH<sub>3</sub>)<sub>3</sub>).

To a solution of 6-((*tert*-butyldiphenylsilyloxy)-hex-1-ene (20.8 g, 61.4 mmol) in CH<sub>2</sub>Cl<sub>2</sub> (200 mL) at 0 °C was added m-CPBA (18.0 g, 104 mmol) and the reaction mixture allowed to warm to RT. After 2 h, the reaction mixture was quenched by addition of saturated aqueous NaHCO<sub>3</sub> (150 mL). The organics were extracted with CH<sub>2</sub>Cl<sub>2</sub> (3  $\times$  100 mL), washed with KOH (100 mL), H<sub>2</sub>O (100 mL) and brine (100 mL). The combined

organic layers were dried (MgSO<sub>4</sub>), filtered and concentrated *in vacuo*. Purification by flash column chromatography (7.5% Et<sub>2</sub>O/Hexane) provided (±)-epoxide **10c** (20.4 g, 94%) as a colourless oil.

**R<sub>f</sub>** 0.21 (5% Et<sub>2</sub>O/Hexane); **<sup>1</sup>H NMR** (400 MHz, CDCl<sub>3</sub>) δ 7.68-7.65 (4H, m, ArH), 7.45-7.36 (6H, m, ArH), 3.67 (2H, t, *J* = 6.2 Hz, H<sub>1</sub>), 2.97-2.87 (1H, m, H<sub>5</sub>), 2.74 (1H, dd, *J* = 5.0, 4.0 Hz, H<sub>6a</sub>), 2.44 (1H, dd, *J* = 5.0, 2.7 Hz, H<sub>6b</sub>), 1.63-1.50 (6H, m, H<sub>2-4</sub>), 1.05 (9H, s, SiC(CH<sub>3</sub>)<sub>3</sub>).<sup>4</sup>

To a suspension of (*S,S*)-Co-salen catalyst<sup>3</sup> (69.0 mg, 0.12 mmol) in toluene (2 mL) at RT was added acetic acid (67.0 μL, 0.12 mmol). After 1 h open to air, the solvent was removed under reduced pressure and the brown tar residue was dried under vacuum. To the residue was added (±)-epoxide **10c** (20.4 g, 57.5 mmol), the reaction mixture was cooled to 0 °C and water (570 μL, 31.7 mmol) was slowly added. After 16 h at RT, purification by flash column chromatography (5% EtOAc/Hexane) provided (*S*)-epoxide **10c** (11.6 g) as a colourless oil. HPLC analysis indicated an ee of 50%. Hence, more catalyst was prepared as above from (*S,S*)-Co-salen catalyst (32.0 mg, 52.0 μmol) and acetic acid (31.0 μL, 52.0 μmol) and this was taken up in THF (13 mL) to improve solubility. (*S*)-epoxide **10c** (11.6 g, 32.7 mmol) was added, the reaction mixture was cooled to 0 °C and water (235.0 μL, 15.9 mmol) was slowly added. After 5 days at 20 °C, the mixture was concentrated *in vacuo* then purified by flash column chromatography (5% EtOAc/Hexane) to provide (*S*)-epoxide **10c** (7.74 g, 48%) as a colourless oil with an ee of 97%.<sup>4</sup>

[α]<sub>D</sub><sup>20</sup> -3.5 (*c* 1.1, CHCl<sub>3</sub>), lit [α]<sub>D</sub><sup>20</sup> +3.8 (*R*-enantiomer, *c* 1.06, CHCl<sub>3</sub>)<sup>4</sup>; **Chiral HPLC** Daicel Chiralpak IA (hexane, flow rate 1 mL/min, 220 nm, 30 °C) *t<sub>R</sub>* minor = 13.0 min, *t<sub>R</sub>* major = 14.8 min.

**(2*S*,6*S*)-6-hexyl-2-(hydroxymethyl)tetrahydropyran (8a) and (2*R*,6*S*)-6-hexyl-2-(hydroxymethyl)tetrahydropyran (9a)**<sup>1</sup>

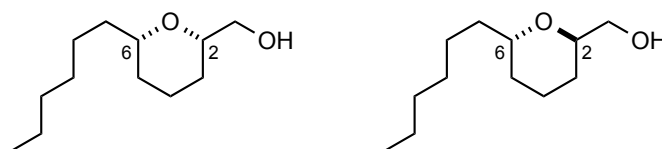

To a solution of magnesium turnings (4.50 g, 191 mmol) and a crystal of iodine in THF (170 mL) was added 2.5 mL of a solution of 4-bromo-1-butene (9.80 mL, 95.5 mmol) in THF (20 mL) and the reaction mixture heated to reflux. Upon initiation of the reaction

(colour changed from orange to clear), the rest of the solution was added over 1 h at RT. After a further 1 h the reaction was cooled to -78 °C and copper(I) iodide (360 mg, 1.91 mmol) added. After 10 min, a solution of (*S*)-epoxide **10a**<sup>5</sup> (4.90 g, 38.2 mmol) in THF (5 mL) was added in one portion. The reaction was warmed to 0 °C over 1 h then warmed to RT for a further hour. The residual magnesium turnings were decanted and the resulting solution extracted with saturated aqueous NH<sub>4</sub>Cl (70 mL) and water (70 mL). The combined aqueous layers were washed with Et<sub>2</sub>O (3 x 50 mL) and the combined organic extracts were washed with brine (100 mL), dried (Na<sub>2</sub>SO<sub>4</sub>), filtered and concentrated *in vacuo*. Purification by flash column chromatography (20% Et<sub>2</sub>O/Hexane) provided (*6S*)-dodec-1-en-6-ol (5.90 g, 84%) as a colourless oil.

**R<sub>f</sub>** 0.4 (25% EtOAc/Pet.Ether); [ $\alpha$ ]<sub>D</sub><sup>20</sup> +1.0 (*c* 3.5, CHCl<sub>3</sub>); **<sup>1</sup>H NMR** (300 MHz, CDCl<sub>3</sub>)  $\delta$  5.81 (1H, app dddd, *J* = 16.9, 13.3, 10.1, 6.7 Hz, H<sub>2</sub>), 5.05-4.92 (2H, m, H<sub>1</sub>), 3.63-3.53 (1H, m, H<sub>6</sub>), 2.10-2.02 (2H, m, H<sub>3</sub>), 1.46-1.37 (6H, m, H<sub>4-5</sub> + H<sub>7</sub>), 1.32-1.25 (8H, m, H<sub>8-11</sub>), 0.88 (3H, t, *J* = 6.8 Hz, H<sub>12</sub>).

To a solution of (*6S*)-dodec-1-en-6-ol (5.90 g, 32.0 mmol) in CH<sub>2</sub>Cl<sub>2</sub> (160 mL) at 0 °C was added *m*-CPBA (8.30 g, 68.9 mmol). The reaction mixture was allowed to warm to RT for 3 h before being re-cooled to 0 °C, and addition of ( $\pm$ )-CSA (1.49 g, 6.40 mmol) in one portion. The reaction mixture was stirred at RT for an additional 2.5 h prior to the addition of a saturated aqueous solution of NaHCO<sub>3</sub> (150 mL). The layers were separated and the aqueous layer washed with CH<sub>2</sub>Cl<sub>2</sub> (2 x 50 mL). The combined organic extracts were washed with brine (100 mL), dried (Na<sub>2</sub>SO<sub>4</sub>), filtered and concentrated *in vacuo*. Purification by flash column chromatography (10→35% EtOAc/Hexane) gave a separable mixture of *syn*-alcohol **8a** and *anti*-alcohol **9a** as colourless oils, in a combined 95% yield (d.r. **8a** : **9a** = 53 : 47).

**8a**: **R<sub>f</sub>** 0.27 (25% EtOAc/Hexane); [ $\alpha$ ]<sub>D</sub><sup>20</sup> -3.3 (*c* 1.8, CHCl<sub>3</sub>); **<sup>1</sup>H NMR** (300 MHz, CDCl<sub>3</sub>)  $\delta$  3.61-3.39 (3H, m, H<sub>1</sub> + H<sub>2</sub>), 3.34-3.24 (1H, m, H<sub>6</sub>), 2.13 (1H, br s, OH), 1.90-1.78 (1H, m, H<sub>4a</sub>), 1.64-1.46 (3H, m, H<sub>3a</sub> + H<sub>4b</sub> + H<sub>5a</sub>), 1.46-1.24 (10H, m, H<sub>7-11</sub>), 1.24-1.09 (2H, m, H<sub>3b</sub> + H<sub>5b</sub>), 0.88 (3H, t, *J* = 6.6 Hz, H<sub>12</sub>).

**9a**: **R<sub>f</sub>** 0.19 (25% EtOAc/Hexane); [ $\alpha$ ]<sub>D</sub><sup>20</sup> -16.1 (*c* 2.0, CHCl<sub>3</sub>); **<sup>1</sup>H NMR** (300 MHz, CDCl<sub>3</sub>)  $\delta$  3.81-3.70 (2H, m, H<sub>2</sub> + H<sub>6</sub>), 3.65 (1H, ddd, *J* = 11.0, 8.4, 2.9 Hz, H<sub>1a</sub>), 3.45 (1H, ddd, *J* = 11.0, 8.4, 3.6 Hz, H<sub>1b</sub>), 2.02 (1H, br s, OH), 1.75-1.51 (5H, m, H<sub>3</sub> + H<sub>4a</sub> + H<sub>5</sub>), 1.44-1.27 (11H, m, H<sub>4b</sub> + H<sub>7-11</sub>), 0.88 (3H, t, *J* = 7.0 Hz, H<sub>12</sub>).

**(2*S*,6*S*)-6-[(4-benzyloxy)butyl]-2-(hydroxymethyl)tetrahydropyran (**8b**) and (2*R*,6*S*)-6-[(4-benzyloxy) butyl]-2-(hydroxymethyl)tetrahydropyran (**9b**)**

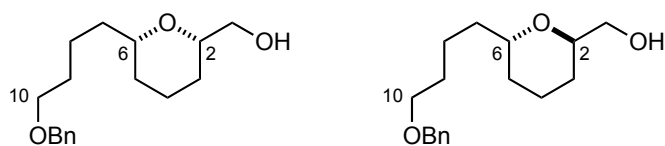

To a solution of magnesium turnings (2.15 g, 88.4 mmol) in Et<sub>2</sub>O (15 mL) was added slowly a solution of 4-bromo-1-butene (6.70 mL, 66.3 mmol) in THF (20 mL) and the reaction mixture heated to 50 °C. After 2 h, the reaction mixture was allowed to cool to RT. To a stirred solution of (*S*)-epoxide **10b** (4.56 g, 22.1 mmol) and copper(I) iodide (550 mg, 2.87 mmol) in THF (50 mL) at -40 °C was added the freshly prepared homoallylmagnesium bromide solution (35 mL, ~1.89 M solution) *via* cannula and the resulting black solution allowed to warm to RT. After 2 h, the solution was quenched by the addition of a saturated aqueous NH<sub>4</sub>Cl (40 mL). The organics were extracted with Et<sub>2</sub>O (3 x 40 mL) and the combined organic extracts were dried (Na<sub>2</sub>SO<sub>4</sub>), filtered and concentrated *in vacuo*. Purification by flash column chromatography (10% EtOAc/Pet. Ether) provided (*5R*)-1-(benzyloxy) dec-9-en-5-ol (5.77 g, 99%) as a colourless oil.

**R<sub>f</sub>** 0.48 (20% EtOAc/Hexane); [ $\alpha$ ]<sub>D</sub><sup>20</sup> +0.14 (*c* 1.46, CHCl<sub>3</sub>); **IR** (thin film) 3399, 2934, 2859, 17.17, 1639, 1454 cm<sup>-1</sup>; **<sup>1</sup>H NMR** (300 MHz, CDCl<sub>3</sub>)  $\delta$  7.37-7.27 (5H, m, ArH), 5.81 (1H, app ddt, *J* = 16.9, 10.2, 6.7 Hz, H<sub>2</sub>), 5.05-4.93 (2H, m, H<sub>1</sub>), 4.50 (2H, s, OCH<sub>2</sub>Ar), 3.63-3.56 (1H, m, H<sub>6</sub>), 3.48 (2H, t, *J* = 6.4 Hz, H<sub>10</sub>), 2.10-2.06 (2H, m, H<sub>3</sub>), 1.69-1.59 (2H, m, H<sub>9</sub>), 1.58-1.36 (8H, m, H<sub>4-5</sub> + H<sub>7-8</sub>); **<sup>13</sup>C NMR** (75 MHz, CDCl<sub>3</sub>)  $\delta$  138.7, 138.5, 128.3, 127.6, 127.5, 114.5, 72.9, 71.6, 70.2, 37.2, 36.8, 33.7, 29.7, 24.9, 22.3; **HRMS** (ES<sup>+</sup>) Calc. for C<sub>17</sub>H<sub>26</sub>O<sub>2</sub>Na [M+Na]<sup>+</sup> 285.1839, found 285.1824.

To a solution of (*5R*)-1-(benzyloxy) dec-9-en-5-ol (5.77 g, 22.0 mmol) in CH<sub>2</sub>Cl<sub>2</sub> (100 mL) at 0 °C was added *m*-CPBA (6.53 g, 37.8 mmol). The reaction mixture was allowed to warm to RT for 3 h before being re-cooled to 0 °C, and addition of ( $\pm$ )-CSA (1.02 g, 4.40 mmol) in one portion. The reaction mixture was stirred at RT for an additional 6 h prior to the addition of a saturated aqueous solution of NaHCO<sub>3</sub> (100 mL). The organics were extracted with CH<sub>2</sub>Cl<sub>2</sub> (3 x 50 mL). The combined organic extracts were dried (Na<sub>2</sub>SO<sub>4</sub>), filtered and concentrated *in vacuo*. Purification by flash column chromatography (5→10% EtOAc/Hexane) gave a separable mixture of *syn*-alcohol **8b** and *anti*-alcohol **9b** as colourless oils, in a combined 77% yield (d.r. **8b** : **9b** = 55 : 44).

**8b**:  $R_f$  0.27 (25% EtOAc/Hexane);  $[\alpha]_D^{20}$  -2.2 ( $c$  1.12,  $\text{CHCl}_3$ ); **IR** (thin film) 3447, 2936, 2859, 1454  $\text{cm}^{-1}$ ;  **$^1\text{H NMR}$**  (400 MHz,  $\text{CDCl}_3$ )  $\delta$  7.38-7.27 (5H, m, ArH), 4.50 (2H, s,  $\text{OCH}_2\text{Ar}$ ), 3.58-3.55 (1H, m,  $\text{H}_{1a}$ ), 3.51-3.41 (4H, m,  $\text{H}_{1b}$  +  $\text{H}_2$  +  $\text{H}_{10}$ ), 3.34-3.28 (1H, m,  $\text{H}_6$ ), 1.91 (1H, br s, OH), 1.87-1.82 (2H, m,  $\text{H}_4$ ), 1.66-1.37 (8H, m,  $\text{H}_{3a}$  +  $\text{H}_{5a}$  +  $\text{H}_{7-9}$ ), 1.24-1.12 (2H, m,  $\text{H}_{3b}$  +  $\text{H}_{5b}$ );  **$^{13}\text{C NMR}$**  (75 MHz,  $\text{CDCl}_3$ )  $\delta$  138.5, 128.3, 127.6, 127.4, 77.9, 77.5, 72.8, 70.2, 66.3, 36.1, 31.5, 29.7, 27.1, 23.1, 22.2; **HRMS** ( $\text{ES}^+$ ) Calc. for  $\text{C}_{17}\text{H}_{27}\text{O}_3$   $[\text{M}+\text{H}]^+$  279.1955, found 279.1960.

**9b**:  $R_f$  0.19 (25% EtOAc/Hexane);  $[\alpha]_D^{20}$  -24.3 ( $c$  1.0,  $\text{CHCl}_3$ ); **IR** (thin film) 3447, 2936, 2862, 1456  $\text{cm}^{-1}$ ;  **$^1\text{H NMR}$**  (400 MHz,  $\text{CDCl}_3$ )  $\delta$  7.36-7.27 (5H, m, ArH), 4.50 (2H, s,  $\text{OCH}_2\text{Ar}$ ), 3.80-3.74 (2H, m,  $\text{H}_2$  +  $\text{H}_6$ ), 3.67 (1H, dd,  $J = 11.1, 8.4$  Hz,  $\text{H}_{1a}$ ), 3.50-3.44 (3H, m,  $\text{H}_{1b}$  +  $\text{H}_{10}$ ), 1.87 (1H, br s, OH), 1.80-1.52 (8H, m,  $\text{H}_{3a}$  +  $\text{H}_4$  +  $\text{H}_{5a}$  +  $\text{H}_7$  +  $\text{H}_9$ ), 1.51-1.32 (4H, m,  $\text{H}_{3b}$  +  $\text{H}_{5b}$  +  $\text{H}_8$ );  **$^{13}\text{C NMR}$**  (75 MHz,  $\text{CDCl}_3$ )  $\delta$  138.5, 128.2, 127.5, 127.3, 72.7, 71.5, 70.7, 70.1, 64.1, 32.0, 29.5, 29.3, 26.3, 22.4, 18.3; **HRMS** ( $\text{ES}^+$ ) Calc. for  $\text{C}_{17}\text{H}_{27}\text{O}_3$   $[\text{M}+\text{H}]^+$  279.1955, found 279.1960.

**(2*S*,6*S*)-6-(((*tert*-butyldiphenylsilyl)oxy)butyl)-2-(hydroxymethyl)tetrahydropyran (8c) and (2*R*,6*S*)-6-(((*tert*-butyldiphenylsilyl)oxy)butyl)-2-(hydroxymethyl)tetrahydropyran (9c)**

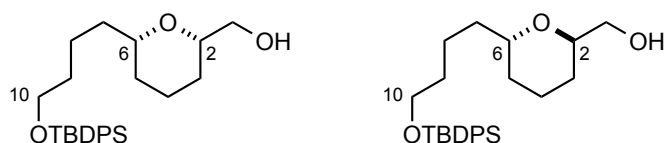

To a solution of magnesium turnings (2.56 g, 109 mmol) and a crystal of iodine in THF (120 mL) was added 3 mL of a solution of 4-bromo-1-butene (5.50 mL, 54.5 mmol) in THF (20 mL) and the reaction mixture heated to reflux. Upon initiation of the reaction (colour changed from orange to clear), the rest of the solution was added over 1 h at RT. After a further 1 h the reaction was cooled to  $-78$   $^{\circ}\text{C}$  and copper(I) iodide (206 mg, 1.08 mmol) added. After 10 min, a solution of (*S*)-epoxide **10c** (4.56 g, 22.1 mmol) in THF (10 mL) was added in one portion. The reaction was warmed to  $0$   $^{\circ}\text{C}$  over 1 h then warmed to RT for a further hour. The residual magnesium turnings were decanted and the resulting solution extracted with saturated aqueous  $\text{NH}_4\text{Cl}$  (100 mL) and water (50 mL). The combined aqueous layers were washed with  $\text{Et}_2\text{O}$  (3 x 50 mL) and the combined organic extracts were washed with brine (200 mL), dried ( $\text{Na}_2\text{SO}_4$ ), filtered and concentrated *in*



*vacuo*. Purification by flash column chromatography (15% Et<sub>2</sub>O/Hexane) provided (5*R*)-1-((*tert*-butyldiphenylsilyl)oxy)dec-9-en-5-ol (8.00 g, 89%) as a colourless oil.

**R<sub>f</sub>** 0.29 (20% Et<sub>2</sub>O/Hexane); [ $\alpha$ ]<sub>D</sub><sup>20</sup> +0.20 (*c* 2.0, CHCl<sub>3</sub>); **IR** (thin film) 3400, 2931, 2859, 1637, 1555 cm<sup>-1</sup>; **<sup>1</sup>H NMR** (300 MHz, CDCl<sub>3</sub>)  $\delta$  7.72-7.61 (4H, m, ArH), 7.49-7.31 (6H, m, ArH), 5.81 (1H, app ddt, *J* = 16.9, 10.2, 6.6 Hz, H<sub>2</sub>), 5.08-4.90 (2H, m, H<sub>1</sub>), 3.67 (2H, t, *J* = 6.2 Hz, H<sub>10</sub>), 3.60-3.57 (1H, m, H<sub>6</sub>), 2.14-2.00 (2H, m, H<sub>3</sub>), 1.64-1.31 (2H, m, H<sub>9</sub>), 1.58-1.36 (8H, m, H<sub>4-5</sub> + H<sub>7-8</sub>), 1.05 (9H, s, SiC(CH<sub>3</sub>)<sub>3</sub>); **<sup>13</sup>C NMR** (75 MHz, CDCl<sub>3</sub>)  $\delta$  138.9, 135.7, 134.2, 129.7, 127.7, 114.7, 71.9, 63.9, 37.3, 37.0, 33.9, 32.7, 27.0, 25.1, 22.0, 19.4; **HRMS** (ES<sup>+</sup>) Calc. for C<sub>26</sub>H<sub>39</sub>O<sub>2</sub>Si [M+H]<sup>+</sup> 411.2714, found 411.2712.

To a solution of (5*R*)-1-((*tert*-butyldiphenylsilyl)oxy)dec-9-en-5-ol (8.00 g, 19.5 mmol) in CH<sub>2</sub>Cl<sub>2</sub> (150 mL) at 0 °C was added *m*-CPBA (6.53 g, 55.7 mmol). The reaction mixture was allowed to warm to RT for 2 h before being re-cooled to 0 °C, and addition of (±)-CSA (867 mg, 3.90 mmol) in one portion. The reaction mixture was stirred at RT for an additional 18 h prior to the addition of a saturated aqueous solution of NaHCO<sub>3</sub> (100 mL). The organics were extracted with CH<sub>2</sub>Cl<sub>2</sub> (3 x 50 mL). The combined organic extracts were washed with brine (100 mL), dried (Na<sub>2</sub>SO<sub>4</sub>), filtered and concentrated *in vacuo*. Purification by flash column chromatography (10→20% EtOAc/Hexane) gave a separable mixture of *syn*-alcohol **8c** and *anti*-alcohol **9c** as colourless oils, in a combined 66% yield (d.r. **8c** : **9c** = 45 : 55).

**8c**: **R<sub>f</sub>** 0.34 (20% EtOAc/Hexane); [ $\alpha$ ]<sub>D</sub><sup>20</sup> -2.9 (*c* 1.2, CHCl<sub>3</sub>); **IR** (thin film) 3426, 3071, 2932, 2857, 1589, 1471 cm<sup>-1</sup>; **<sup>1</sup>H NMR** (300 MHz, CDCl<sub>3</sub>)  $\delta$  7.69-7.64 (4H, m, ArH), 7.45-7.34 (6H, m, ArH), 3.66 (2H, t, *J* = 6.3 Hz, H<sub>10</sub>), 3.58-3.42 (3H, m, H<sub>1</sub> + H<sub>2</sub>), 3.32-3.25 (1H, m, H<sub>6</sub>), 1.87-1.81 (1H, m, H<sub>4a</sub>), 1.61-1.37 (8H, m, H<sub>4b</sub> + H<sub>3a</sub> + H<sub>7-9</sub>), 1.26-1.04 (3H, m, H<sub>3b</sub> + H<sub>5</sub>); 1.04 (9H, s, SiC(CH<sub>3</sub>)<sub>3</sub>); **<sup>13</sup>C NMR** (75 MHz, CDCl<sub>3</sub>)  $\delta$  135.7, 134.2, 129.6, 127.7, 78.1, 77.8, 66.5, 63.9, 36.3, 32.7, 31.7, 27.3, 27.0, 23.3, 21.9, 19.4; **HRMS** (ES<sup>+</sup>) Calc. for C<sub>26</sub>H<sub>39</sub>O<sub>3</sub>Si [M+H]<sup>+</sup> 427.2663, found 427.2664.

**9c**: **R<sub>f</sub>** 0.25 (20% EtOAc/Hexane); [ $\alpha$ ]<sub>D</sub><sup>20</sup> -15.7 (*c* 1.0, CHCl<sub>3</sub>); **IR** (thin film) 3389, 3071, 2934, 2859, 1471 cm<sup>-1</sup>; **<sup>1</sup>H NMR** (300 MHz, CDCl<sub>3</sub>)  $\delta$  7.71-7.68 (4H, m, ArH), 7.48-7.37 (6H, m, ArH), 3.81-3.75 (2H, m, H<sub>2</sub> + H<sub>6</sub>), 3.69 (2H, t, *J* = 6.4 Hz, H<sub>10</sub>), 3.68 (1H, dd, *J* = 10.9, 8.3 Hz, H<sub>1a</sub>), 3.49 (1H, dd, *J* = 10.9, 3.5 Hz, H<sub>1b</sub>), 1.90 (1H, br s, OH), 1.72-1.57 (8H, m, H<sub>3a</sub> + H<sub>4</sub> + H<sub>5a</sub> + H<sub>7</sub> + H<sub>9</sub>), 1.45-1.29 (4H, m, H<sub>3b</sub> + H<sub>5b</sub> + H<sub>8</sub>), 1.07 (9H, s, SiC(CH<sub>3</sub>)<sub>3</sub>); **<sup>13</sup>C NMR** (75 MHz, CDCl<sub>3</sub>)  $\delta$  135.7, 134.2, 130.0, 127.7, 71.8, 70.9, 64.4, 63.9, 32.6,

32.3, 29.6, 27.0, 26.6, 22.3, 19.4, 18.6; **HRMS** (ES<sup>+</sup>) Calc. for C<sub>26</sub>H<sub>39</sub>O<sub>3</sub>Si [M+H]<sup>+</sup> 427.2663, found 427.2664.

**(2S,6S)-[2-azidomethyl-6-hexyl]tetrahydropyran (11a)**

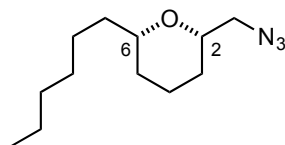

To a solution of alcohol **8a** (52.5 mg, 0.26 mmol) in THF (3 mL) was added PPh<sub>3</sub> (82.5 mg, 0.31 mmol) and <sup>i</sup>Pr<sub>2</sub>NEt (46.0 μL, 0.26 mmol). The solution was then cooled to 10 °C and DIAD (62.0 μL, 0.31 mmol) was added dropwise. After 20 min, DPPA (68.0 μL, 0.31 mmol) was added dropwise and the solution allowed to warm to RT and left to stir for 16 h. The reaction mixture was quenched by the addition of H<sub>2</sub>O (3 mL). The organics were extracted with EtOAc (3 × 5 mL), dried over Na<sub>2</sub>SO<sub>4</sub> and concentrated *in vacuo*. Purification by flash column chromatography (5% EtOAc/Hexane) provided azide **11a** (42.2 mg, 71%) as a colourless oil.

**R<sub>f</sub>** 0.79 (10% EtOAc/Hexane); [α]<sub>D</sub><sup>20</sup> -33.8 (*c* 1.62, CHCl<sub>3</sub>); **IR** (thin film) 2932, 2859, 2170, 2095, 1591, 1489 cm<sup>-1</sup>; **<sup>1</sup>H NMR** (400 MHz, CDCl<sub>3</sub>) δ 3.53 (1H, dddd, *J* = 11.4, 7.5, 3.5, 2.1 Hz, H<sub>2</sub>), 3.34-3.27 (1H, m, H<sub>6</sub>), 3.29 (1H, dd, *J* = 12.8, 7.5 Hz, H<sub>1a</sub>), 3.07 (1H, dd, *J* = 12.8, 3.5 Hz, H<sub>1b</sub>), 1.90-1.82 (1H, m, H<sub>4a</sub>), 1.61-1.33 (7H, m, H<sub>3a</sub> + H<sub>4b</sub> + H<sub>5a</sub> + H<sub>7</sub> + H<sub>10</sub>), 1.32-1.14 (8H, m, H<sub>3b</sub> + H<sub>5b</sub> + H<sub>8-9</sub> + H<sub>11</sub>), 0.87 (3H, t, *J* = 6.8 Hz, H<sub>12</sub>); **<sup>13</sup>C NMR** (100 MHz, CDCl<sub>3</sub>) δ 78.0, 77.0, 55.4, 36.4, 31.8, 31.3, 29.3, 28.7, 25.5, 23.3, 22.6, 14.1; **HRMS** (CI<sup>+</sup>) Calc. for C<sub>12</sub>H<sub>24</sub>ON<sub>3</sub> [M+H]<sup>+</sup> 226.1914, found 226.1912.

**(2S,6S)-2-(azidomethyl)-6-[4-(benzyloxy)butyl]tetrahydropyran (11b)**

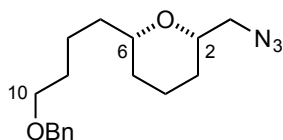

To a solution of alcohol **8b** (403 mg, 1.45 mmol) in THF (10 mL) was added PPh<sub>3</sub> (456 mg, 1.74 mmol) and <sup>i</sup>Pr<sub>2</sub>NEt (250 μL, 1.45 mmol). The solution was then cooled to 10 °C and DIAD (340 μL, 1.74 mmol) was added dropwise. After 20 min, DPPA (370 μL, 1.74 mmol) was added dropwise and the solution allowed to warm to RT and left to stir for 16

h. The reaction mixture was quenched by the addition of H<sub>2</sub>O (10 mL). The organics were extracted with EtOAc (3 × 10 mL), dried over Na<sub>2</sub>SO<sub>4</sub> and concentrated *in vacuo*. Purification by flash column chromatography (15% EtOAc/Hexane) provided azide **11b** (430 mg, 98%) as a colourless oil.

**R<sub>f</sub>** 0.68 (20% EtOAc/Hexane);  $[\alpha]_D^{20}$  -31.6 (*c* 1.04, CHCl<sub>3</sub>); **IR** (thin film) 2938, 2859, 2093, 1717, 1454 cm<sup>-1</sup>; **<sup>1</sup>H NMR** (400 MHz, CDCl<sub>3</sub>) δ 7.35-7.24 (5H, m, ArH), 4.49 (2H, s, OCH<sub>2</sub>Ar), 3.54-3.48 (1H, m, H<sub>2</sub>), 3.47 (2H, t, *J* = 6.5 Hz, H<sub>10</sub>), 3.34-3.29 (1H, m, H<sub>6</sub>), 3.26 (1H, dd, *J* = 12.8, 7.5 Hz, H<sub>1a</sub>), 3.05 (1H, dd, *J* = 12.8, 3.4 Hz, H<sub>1b</sub>), 1.89-1.82 (1H, m, H<sub>4a</sub>), 1.68-1.39 (9H, m, H<sub>3a</sub> + H<sub>4b</sub> + H<sub>5a</sub> + H<sub>7-9</sub>), 1.29-1.13 (2H, m, H<sub>3b</sub> + H<sub>5b</sub>); **<sup>13</sup>C NMR** (100 MHz, CDCl<sub>3</sub>) δ 138.5, 128.1, 127.4, 127.2, 77.6, 76.8, 72.6, 70.2, 55.1, 36.0, 31.1, 29.5, 28.5, 23.0, 21.9; **HRMS** (ES<sup>+</sup>) Calc. for C<sub>17</sub>H<sub>26</sub>O<sub>2</sub>N<sub>3</sub> [M+H]<sup>+</sup> 304.2020, found 304.2021.

**(2*S*,6*S*)-2-(azidomethyl)-6-[4-((*tert*-butyldiphenylsilyl)oxy)butyl]tetrahydropyran (11c)**

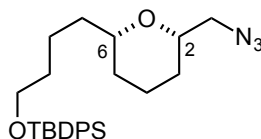

To a solution of alcohol **8c** (619 mg, 1.45 mmol) in THF (10 mL) was added PPh<sub>3</sub> (456 mg, 1.74 mmol) and <sup>i</sup>Pr<sub>2</sub>NEt (250 μL, 1.45 mmol). The solution was then cooled to 0 °C and DIAD (340 μL, 1.74 mmol) was added dropwise. After 20 min, DPPA (370 μL, 1.74 mmol) was added dropwise and the solution allowed to warm to RT and left to stir for 24 h. The reaction mixture was quenched by the addition of H<sub>2</sub>O (15 mL). The organics were extracted with EtOAc (3 × 10 mL) and the combined organic layers washed with brine (20 mL), dried (Na<sub>2</sub>SO<sub>4</sub>) and concentrated *in vacuo*. Purification by flash column chromatography (30% EtOAc/Hexane) provided azide **11c** (574 mg, 88%) as a colourless oil.

**R<sub>f</sub>** 0.65 (10% EtOAc/Hexane);  $[\alpha]_D^{20}$  -16.7 (*c* 1.1, CHCl<sub>3</sub>); **IR** (thin film) 3071, 2934, 2859, 2170, 2095, 1716, 1589 cm<sup>-1</sup>; **<sup>1</sup>H NMR** (300 MHz, CDCl<sub>3</sub>) δ 7.68-7.65 (4H, m, ArH), 7.44-7.34 (6H, m, ArH), 3.66 (2H, t, *J* = 6.3 Hz, H<sub>10</sub>), 3.56-3.48 (1H, m, H<sub>2</sub>), 3.35-3.24 (1H, m, H<sub>6</sub>), 3.28 (1H, dd, *J* = 12.7, 7.3 Hz, H<sub>1a</sub>), 3.07 (1H, dd, *J* = 12.7, 3.6 Hz, H<sub>1b</sub>), 1.90-1.82 (1H, m, H<sub>4a</sub>), 1.62-1.37 (8H, m, H<sub>4b</sub> + H<sub>3a</sub> + H<sub>7-9</sub>), 1.31-1.09 (3H, m, H<sub>3b</sub> + H<sub>5</sub>); 1.05 (9H, s, SiC(CH<sub>3</sub>)<sub>3</sub>); **<sup>13</sup>C NMR** (75 MHz, CDCl<sub>3</sub>) δ 135.7, 134.3, 129.6, 127.7, 78.0,

77.1, 64.1, 55.6, 36.2, 32.7, 31.4, 28.9, 27.0, 23.4, 21.9, 19.4; **HRMS** (ES<sup>+</sup>) Calc. for C<sub>26</sub>H<sub>38</sub>O<sub>2</sub>N<sub>3</sub>Si [M+H]<sup>+</sup> 452.2728, found 452.2725.

**(2R,6S)-[2-azidomethyl-6-hexyl]tetrahydropyran (12)**

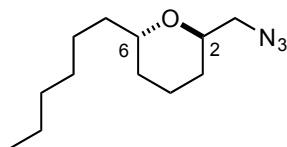

To a solution of alcohol **9a** (50 mg, 0.26 mmol) in THF (10 mL) was added PPh<sub>3</sub> (83 mg, 0.32 mmol) and <sup>i</sup>Pr<sub>2</sub>NEt (46 μL, 0.26 mmol). The solution was then cooled to 10 °C and DIAD (62 μL, 0.32 mmol) was added dropwise. After 20 min, DPPA (68 μL, 0.32 mmol) was added dropwise and the solution allowed to warm to RT and left to stir for 16 h. The reaction mixture was quenched by the addition of H<sub>2</sub>O (3 mL). The organics were extracted with EtOAc (3 × 7 mL), dried over Na<sub>2</sub>SO<sub>4</sub> and concentrated *in vacuo*. Purification by flash column chromatography (2% Et<sub>2</sub>O/Hexane) provided azide **12** (22 mg, 37%) as a colourless oil.

**R<sub>f</sub>** 0.75 (10% EtOAc/Hexane); [α]<sub>D</sub><sup>20</sup> -2.1 (*c* 0.8, CHCl<sub>3</sub>); **IR** (thin film) 2926, 2855, 2095, 1724, 1458, 1427 cm<sup>-1</sup>; **<sup>1</sup>H NMR** (400 MHz, CDCl<sub>3</sub>) δ 3.85 (1H, app tt, *J* = 7.6, 3.8 Hz, H<sub>2</sub>), 3.81-3.75 (1H, m, H<sub>6</sub>), 3.43 (1H, dd, *J* = 12.7, 8.1 Hz, H<sub>1a</sub>), 3.08 (1H, dd, *J* = 12.7, 4.1 Hz, H<sub>1b</sub>), 1.75-1.56 (5H, m, H<sub>3a</sub> + H<sub>4</sub> + H<sub>5a</sub> + H<sub>7a</sub>), 1.41-1.22 (11H, m, H<sub>3b</sub> + H<sub>5b</sub> + H<sub>7b</sub> + H<sub>8-11</sub>), 0.88 (3H, t, *J* = 6.4 Hz, H<sub>12</sub>); **<sup>13</sup>C NMR** (100 MHz, CDCl<sub>3</sub>) δ 72.0, 69.7, 53.8, 32.2, 31.8, 29.3, 29.2, 27.9, 25.7, 22.6, 18.3, 14.1; **HRMS** (ES<sup>+</sup>) Calc. for C<sub>12</sub>H<sub>23</sub>O<sub>2</sub>N<sub>3</sub>Na [M+Na]<sup>+</sup> 248.1733, found 248.1728.

**(2R,6R)-[2-azidomethyl-6-hexyl]tetrahydropyran (13)**

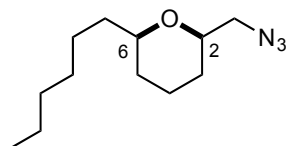

Prepared in an identical manner to **11a**.

[α]<sub>D</sub><sup>20</sup> +35.7 (*c* 0.9, CHCl<sub>3</sub>).

**(2*S*,6*S*)-6-[(4-benzyloxy)butyl]-2-(carbaldehyde)tetrahydropyran (**14b**)**

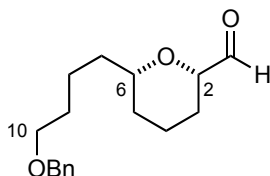

To a solution of dimethyl sulfoxide (310  $\mu\text{L}$ , 4.37 mmol) in  $\text{CH}_2\text{Cl}_2$  (10 mL) at  $-78\text{ }^\circ\text{C}$  was added oxalyl chloride (310  $\mu\text{L}$ , 3.59 mmol). The reaction mixture was stirred at this temperature for 30 min before the addition of alcohol **8b** (500 mg, 1.80 mmol) as a solution in  $\text{CH}_2\text{Cl}_2$  (5 mL) *via* cannula. The reaction was stirred for a further 1 h, before the dropwise addition of  $\text{Et}_3\text{N}$  (1.75 mL, 12.6 mmol) and the reaction mixture was warmed to RT over 30 min. After the addition of saturated aqueous  $\text{NH}_4\text{Cl}$  (10 mL), the organics were extracted with  $\text{CH}_2\text{Cl}_2$  (3 x 15 mL) and the combined organic extracts were dried ( $\text{Na}_2\text{SO}_4$ ), filtered and concentrated *in vacuo*. Purification by flash column chromatography (5% EtOAc/Hexane) provided aldehyde **14b** (432 mg, 87%) as a colourless oil.

$R_f$  0.54 (25% EtOAc/Hexane);  $[\alpha]_D^{20}$   $-38.7$  ( $c$  1.6,  $\text{CHCl}_3$ ); **IR** (thin film) 3402, 2938, 2859, 1738, 1454, 1362  $\text{cm}^{-1}$ ;  **$^1\text{H NMR}$**  (300 MHz,  $\text{CDCl}_3$ )  $\delta$  9.62 (1H, s,  $\underline{\text{H}}_1$ ), 7.36-7.26 (5H, m, Ar $\underline{\text{H}}$ ), 4.50 (2H, s, O $\underline{\text{C}}\text{H}_2$ Ar), 3.78 (1H, ddd,  $J = 11.9, 2.7, 0.6$  Hz,  $\underline{\text{H}}_2$ ), 3.48 (2H, t,  $J = 6.4$  Hz,  $\underline{\text{H}}_{10}$ ), 3.41-3.32 (1H, m,  $\underline{\text{H}}_6$ ), 1.98-1.89 (1H, m,  $\underline{\text{H}}_{4a}$ ), 1.85-1.77 (1H, m,  $\underline{\text{H}}_{3a}$ ), 1.69-1.43 (8H, m,  $\underline{\text{H}}_{4b} + \underline{\text{H}}_{5a} + \underline{\text{H}}_{7-9}$ ), 1.41-1.16 (2H, m,  $\underline{\text{H}}_{3b} + \underline{\text{H}}_{5b}$ );  **$^{13}\text{C NMR}$**  (75 MHz,  $\text{CDCl}_3$ )  $\delta$  202.3, 138.6, 128.3, 127.6, 127.4, 81.8, 77.9, 72.9, 70.2, 36.0, 31.0, 29.7, 26.1, 22.9, 22.1; **HRMS** ( $\text{ES}^+$ ) Calc. for  $\text{C}_{17}\text{H}_{25}\text{O}_3$   $[\text{M}+\text{H}]^+$  277.1811, found 277.1796.

**(2*R*,6*S*)-[2-carbaldehyde-6-hexyl]tetrahydropyran (**15a**)<sup>6</sup>**

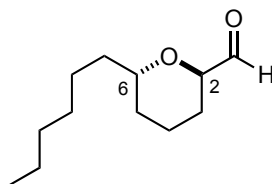

To a solution of dimethyl sulfoxide (300  $\mu\text{L}$ , 4.23 mmol) in  $\text{CH}_2\text{Cl}_2$  (8 mL) at  $-78\text{ }^\circ\text{C}$  was added oxalyl chloride (300  $\mu\text{L}$ , 3.47 mmol). The reaction mixture was stirred at this temperature for 30 min before the addition of alcohol **9a** (350 mg, 1.75 mmol) as a solution in  $\text{CH}_2\text{Cl}_2$  (2 mL) *via* cannula. The reaction was stirred for a further 1 h, before

the dropwise addition of Et<sub>3</sub>N (1.70 mL, 12.2 mmol) and the reaction mixture was warmed to RT over 30 min. After the addition of saturated aqueous NH<sub>4</sub>Cl (10 mL), the organics were extracted with CH<sub>2</sub>Cl<sub>2</sub> (3 x 15 mL) and the combined organic extracts were dried (Na<sub>2</sub>SO<sub>4</sub>), filtered and concentrated *in vacuo*. Purification by flash column chromatography (5% EtOAc/Hexane) provided aldehyde **15a** (305 mg, 88%) as a colourless oil, which was used without further characterization.

**R<sub>f</sub>** 0.35 (5% EtOAc/Hexane);  $[\alpha]_D^{20}$  -70.4 (*c* 1.89, CHCl<sub>3</sub>), lit  $[\alpha]_D^{20}$  -24.5 (*c* 1.8, CHCl<sub>3</sub>)<sup>6</sup>; **<sup>1</sup>H NMR** (500 MHz, CDCl<sub>3</sub>) δ 9.84 (1H, br s, H<sub>1</sub>), 4.18 (1H, dd, *J* = 6.0, 2.9 Hz, H<sub>2</sub>), 3.58-3.54 (1H, m, H<sub>6</sub>), 2.02-1.98 (1H, m, H<sub>3a</sub>), 1.73-1.65 (2H, m, H<sub>3b</sub> + H<sub>4a</sub>), 1.63-1.57 (2H, m, H<sub>5a</sub> + H<sub>7a</sub>), 1.49-1.25 (11H, m, H<sub>4b</sub> + H<sub>5b</sub> + H<sub>7b</sub> + H<sub>8-11</sub>), 0.88 (3H, t, *J* = 6.7 Hz, H<sub>12</sub>).

**(2*R*,6*S*)-6-[(4-benzyloxy)butyl]-2-(carbaldehyde)tetrahydropyran (**15b**)**

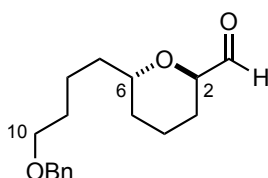

To a solution of dimethyl sulfoxide (360 μL, 5.08 mmol) in CH<sub>2</sub>Cl<sub>2</sub> (10 mL) at -78 °C was added oxalyl chloride (370 μL, 4.28 mmol). The reaction mixture was stirred at this temperature for 30 min before the addition of alcohol **9b** (590 mg, 2.12 mmol) as a solution in CH<sub>2</sub>Cl<sub>2</sub> (5 mL) *via* cannula. The reaction was stirred for a further 1 h, before the dropwise addition of Et<sub>3</sub>N (2.06 mL, 14.8 mmol) and the reaction mixture was warmed to RT over 30 min. After the addition of saturated aqueous NH<sub>4</sub>Cl (10 mL), the organics were extracted with CH<sub>2</sub>Cl<sub>2</sub> (3 x 15 mL) and the combined organic extracts were dried (Na<sub>2</sub>SO<sub>4</sub>), filtered and concentrated *in vacuo*. Purification by flash column chromatography (10% EtOAc/Hexane) provided aldehyde **15b** (486 mg, 83%) as a colourless oil.

**R<sub>f</sub>** 0.5 (25% EtOAc/Hexane);  $[\alpha]_D^{20}$  -51.0 (*c* 1.75, CHCl<sub>3</sub>); **IR** (thin film) 2940, 2862, 1732, 1454, 1362 cm<sup>-1</sup>; **<sup>1</sup>H NMR** (400 MHz, CDCl<sub>3</sub>) δ 9.83 (1H, br s, H<sub>1</sub>), 7.36-7.25 (5H, m, ArH), 4.50 (2H, s, OCH<sub>2</sub>Ar), 4.17 (1H, dd, *J* = 6.1, 3.0 Hz, H<sub>2</sub>), 3.60-3.54 (1H, m, H<sub>6</sub>), 3.49 (2H, t, *J* = 6.5 Hz, H<sub>10</sub>), 2.03-1.97 (1H, m, H<sub>3a</sub>), 1.73-1.53 (7H, m, H<sub>3b</sub> + H<sub>4a</sub> + H<sub>5a</sub> + H<sub>8-9</sub>), 1.52-1.36 (3H, m, H<sub>4b</sub> + H<sub>7</sub>), 1.34-1.24 (1H, m, H<sub>5b</sub>); **<sup>13</sup>C NMR** (100 MHz, CDCl<sub>3</sub>) δ

205.2, 138.5, 128.3, 127.6, 127.5, 78.8, 74.7, 72.8, 70.2, 35.4, 30.5, 29.7, 23.9, 22.1, 19.8;  
**HRMS** (ES<sup>+</sup>) Calc. for C<sub>17</sub>H<sub>24</sub>O<sub>3</sub>Na [M+Na]<sup>+</sup> 299.1631, found 299.1616.

**(2S,6S)-[2-ethynyl-6-hexyl]tetrahydropyran (16a)**

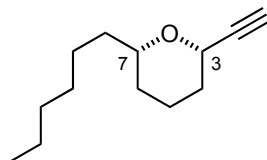

To a solution of dimethyldiazo-2-oxopropylphosphonate (160 mg, 0.83 mmol) and K<sub>2</sub>CO<sub>3</sub> (190 mg, 1.38 mmol) in MeOH (4 mL) at RT was added a solution of aldehyde **14a** (136 mg, 0.69 mmol) in MeOH (1 mL). After 16 h, the reaction mixture was quenched by addition of saturated aqueous NaHCO<sub>3</sub> (5 mL). The organics were extracted with Et<sub>2</sub>O (3 × 10 mL), dried (Na<sub>2</sub>SO<sub>4</sub>) and concentrated *in vacuo*. Purification by flash column chromatography (1% EtOAc/Hexane) provided alkyne **16a** (96.5 mg, 72%) as a colourless oil.

**R<sub>f</sub>** 0.80 (5% EtOAc/Hexane); [α]<sub>D</sub><sup>20</sup> -36.5 (*c* 1.55, CHCl<sub>3</sub>); **IR** (thin film) 2924, 2855, 1456, 1377, 1312 cm<sup>-1</sup>; **<sup>1</sup>H NMR** (400 MHz, CDCl<sub>3</sub>) δ 4.08 (1H, dt, *J* = 11.3, 2.2 Hz, H<sub>3</sub>), 3.30-3.24 (1H, m, H<sub>7</sub>), 2.44 (1H, d, *J* = 2.2 Hz, H<sub>1</sub>), 1.86-1.78 (2H, m, H<sub>4a</sub> + H<sub>5a</sub>), 1.69-1.35 (5H, m, H<sub>4b</sub> + H<sub>5b</sub> + H<sub>6a</sub> + H<sub>8</sub>), 1.34-1.18 (9H, m, H<sub>6b</sub> + H<sub>9-12</sub>), 0.87 (3H, t, *J* = 7.0 Hz, H<sub>13</sub>); **<sup>13</sup>C NMR** (100 MHz, CDCl<sub>3</sub>) δ 83.6, 78.6, 72.1, 67.8, 36.4, 32.5, 31.8, 30.7, 29.3, 25.4, 23.4, 22.6, 14.1; **HRMS** (EI<sup>+</sup>) Calc. for C<sub>13</sub>H<sub>22</sub>O [M]<sup>+</sup> 194.1665, found 194.1665.

**(2S,6S)-6-[(4-benzyloxy)butyl]-2-(ethynyl)tetrahydropyran (16b)**

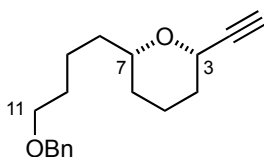

To a solution of dimethyldiazo-2-oxopropylphosphonate (360 mg, 1.88 mmol) and K<sub>2</sub>CO<sub>3</sub> (430 mg, 3.13 mmol) in MeOH (10 mL) at RT was added as a solution of aldehyde **14b** (432 mg, 1.56 mmol) in MeOH (5 mL) and left to stir for 16 h. The reaction mixture was quenched by addition of saturated aqueous NaHCO<sub>3</sub> (15 mL). The organics were extracted with Et<sub>2</sub>O (3 × 15 mL), dried over Na<sub>2</sub>SO<sub>4</sub> and concentrated *in vacuo*. Purification by flash

column chromatography (5% EtOAc/Hexane) provided alkyne **16b** (376 mg, 88%) as a colourless oil.

**R<sub>f</sub>** 0.56 (15% EtOAc/Hexane);  $[\alpha]_D^{20}$  -28.5 (*c* 0.72, CHCl<sub>3</sub>); **IR** (thin film) 3289, 2938, 2859, 1717, 1454 cm<sup>-1</sup>; **<sup>1</sup>H NMR** (400 MHz, CDCl<sub>3</sub>) δ 7.36-7.27 (5H, m, ArH), 4.49 (2H, s, OCH<sub>2</sub>Ar), 4.08 (1H, dt, *J* = 11.3, 2.2 Hz, H<sub>3</sub>), 3.47 (2H, t, *J* = 6.7 Hz, H<sub>11</sub>), 3.31-3.25 (1H, m, H<sub>7</sub>), 2.44 (1H, d, *J* = 2.2 Hz, H<sub>1</sub>), 1.86-1.79 (2H, m, H<sub>4a</sub> + H<sub>5a</sub>), 1.69-1.37 (9H, m, H<sub>4b</sub> + H<sub>5b</sub> + H<sub>6a</sub> + H<sub>8-10</sub>), 1.28-1.19 (1H, m, H<sub>6b</sub>); **<sup>13</sup>C NMR** (100 MHz, CDCl<sub>3</sub>) δ 138.6, 128.3, 127.6, 127.5, 83.6, 78.4, 72.9, 72.2, 70.3, 67.8, 36.1, 32.5, 30.7, 29.7, 23.3, 22.1; **HRMS** (ES<sup>+</sup>) Calc. for C<sub>18</sub>H<sub>25</sub>O<sub>2</sub> [M+H]<sup>+</sup> 273.1849, found 273.1854.

### (2*R*,6*S*)-[2-ethynyl-6-hexyl]tetrahydropyran (**17a**)

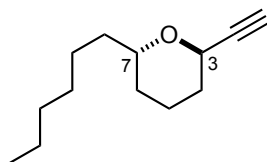

To a solution of CBr<sub>4</sub> (1.19 g, 3.59 mmol) in CH<sub>2</sub>Cl<sub>2</sub> (7 mL) at 0 °C was added PPh<sub>3</sub> (1.88 g, 7.17 mmol) and the reaction mixture cooled to -78 °C. After 5 min, a solution of aldehyde **15a** (356 mg, 1.79 mmol) in CH<sub>2</sub>Cl<sub>2</sub> (3 mL) was added and the reaction mixture was not allowed to exceed -50 °C over 45 min. The reaction mixture was quenched by addition of saturated aqueous NH<sub>4</sub>Cl (10 mL), the organics were extracted with CH<sub>2</sub>Cl<sub>2</sub> (3 × 15 mL) and the combined organic extracts were dried (NaSO<sub>4</sub>), filtered and concentrated *in vacuo*. Purification by flash column chromatography (2% EtOAc/Hexane) provided (2*R*,6*S*)-[2-(2,2-dibromo-ethenyl)-6-(hexyl)]tetrahydropyran (515 mg, 81%) as a colourless oil.

**R<sub>f</sub>** 0.77 (5% Acetone/Hexane);  $[\alpha]_D^{20}$  -40.3 (*c* 1.01, CHCl<sub>3</sub>); **IR** (thin film) 2937, 2857, 1732, 1607, 1458 cm<sup>-1</sup>; **<sup>1</sup>H NMR** (400 MHz, CDCl<sub>3</sub>) δ 6.76 (1H, d, *J* = 7.5 Hz, H<sub>2</sub>), 4.46 (1H, app dt, *J* = 7.5, 4.4 Hz, H<sub>3</sub>), 3.65-3.59 (1H, m, H<sub>7</sub>), 1.78-1.50 (5H, m, H<sub>4-5</sub> + H<sub>6a</sub>), 1.43-1.23 (11H, m, H<sub>6b</sub> + H<sub>8-12</sub>), 0.88 (3H, t, *J* = 6.7 Hz, H<sub>13</sub>); **<sup>13</sup>C NMR** (100 MHz, CDCl<sub>3</sub>) δ 137.9, 91.1, 72.4, 72.0, 34.3, 31.8, 30.1, 29.2, 29.0, 25.5, 22.6, 18.9, 14.1; **HRMS** (Cl<sup>+</sup>) Calc. for C<sub>13</sub>H<sub>23</sub>O<sup>79</sup>Br<sub>2</sub> [M+H]<sup>+</sup> 353.0110, found 353.0110.

To a solution of (2*R*,6*S*)-[2-(2,2-dibromo-ethenyl)-6-(hexyl)]tetrahydropyran (151 mg, 0.43 mmol) in THF (6 mL) at -78 °C was added *n*-BuLi (800 μL, 1.6 M solution in hexane,



1.28 mmol). After 1.5 h, the reaction mixture was quenched by addition of saturated aqueous  $\text{NH}_4\text{Cl}$  (10 mL). The organics were extracted with EtOAc ( $3 \times 15$  mL), dried ( $\text{Na}_2\text{SO}_4$ ), filtered and concentrated *in vacuo*. Purification by flash column chromatography (1% EtOAc/Hexane) provided alkyne **17a** (57.7 mg, 70%) as a colourless oil.

$R_f$  0.77 (5% Acetone/Hexane);  $[\alpha]_D^{20}$  -11.1 ( $c$  1.09,  $\text{CHCl}_3$ ); **IR** (thin film) 3310, 2932, 2860, 1466, 1456  $\text{cm}^{-1}$ ;  **$^1\text{H NMR}$**  (300 MHz,  $\text{CDCl}_3$ )  $\delta$  4.77-4.73 (1H, m,  $\underline{\text{H}}_3$ ), 3.86-3.78 (1H, m,  $\underline{\text{H}}_7$ ), 2.45 (1H, d,  $J = 2.3$  Hz,  $\underline{\text{H}}_1$ ), 1.91-1.73 (2H, m,  $\underline{\text{H}}_{4a} + \underline{\text{H}}_{5a}$ ), 1.71-1.57 (3H, m,  $\underline{\text{H}}_{4b} + \underline{\text{H}}_{5b} + \underline{\text{H}}_{6a}$ ), 1.53-1.14 (11H, m,  $\underline{\text{H}}_{6b} + \underline{\text{H}}_{8-12}$ ), 0.87 (3H, t,  $J = 6.9$  Hz,  $\underline{\text{H}}_{13}$ );  **$^{13}\text{C NMR}$**  (100 MHz,  $\text{CDCl}_3$ )  $\delta$  82.5, 74.1, 71.7, 64.8, 36.2, 31.8, 31.4, 30.4, 29.3, 25.3, 22.6, 19.3, 14.1; **HRMS** ( $\text{CI}^+$ ) Calc. for  $\text{C}_{13}\text{H}_{23}\text{O}$   $[\text{M}+\text{H}]^+$  195.1743, found 195.1745.

**(2R,6S)-6-[(4-benzyloxy)butyl]-2-(ethynyl)tetrahydropyran (17b)**

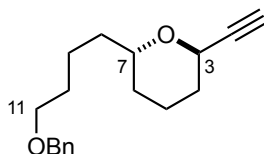

To a solution of  $\text{CBr}_4$  (1.15 g, 3.47 mmol) in  $\text{CH}_2\text{Cl}_2$  (5 mL) at  $0^\circ\text{C}$  was added  $\text{PPh}_3$  (1.81 g, 6.90 mmol) and the reaction mixture cooled to  $-78^\circ\text{C}$ . After 5 min, a solution of aldehyde **15b** (478 mg, 1.73 mmol) in  $\text{CH}_2\text{Cl}_2$  (5 mL) was added and the reaction mixture was not allowed to exceed  $-50^\circ\text{C}$  over 50 min. The reaction mixture was quenched by addition of saturated aqueous  $\text{NH}_4\text{Cl}$  (10 mL), the organics were extracted with  $\text{CH}_2\text{Cl}_2$  ( $3 \times 15$  mL) and the combined organic extracts were dried ( $\text{NaSO}_4$ ), filtered and concentrated *in vacuo*. Purification by flash column chromatography (5% EtOAc/Hexane) provided (2R,6S)-6-[(4-benzyloxy)butyl]-2-[(2,2-dibromo-ethenyl)]tetrahydropyran (687 mg, 92%) as a colourless oil.

$R_f$  0.65 (15% EtOAc/Hexane);  $[\alpha]_D^{20}$  -37.0 ( $c$  0.82,  $\text{CHCl}_3$ ); **IR** (thin film) 2938, 2862, 1759, 1717, 1607, 1454  $\text{cm}^{-1}$ ;  **$^1\text{H NMR}$**  (300 MHz,  $\text{CDCl}_3$ )  $\delta$  7.35-7.27 (5H, m, ArH), 6.76 (1H, d,  $J = 7.5$  Hz,  $\underline{\text{H}}_2$ ), 4.50 (2H, s,  $\text{OCH}_2\text{Ar}$ ), 4.45 (1H, app dt,  $J = 7.5, 4.5$  Hz,  $\underline{\text{H}}_3$ ), 3.66-3.58 (1H, m,  $\underline{\text{H}}_7$ ), 3.48 (2H, t,  $J = 6.5$  Hz,  $\underline{\text{H}}_{11}$ ), 1.80-1.49 (7H, m,  $\underline{\text{H}}_{4-5} + \underline{\text{H}}_{6a} + \underline{\text{H}}_{10}$ ), 1.46-1.24 (5H, m,  $\underline{\text{H}}_{6b} + \underline{\text{H}}_{8-9}$ );  **$^{13}\text{C NMR}$**  (100 MHz,  $\text{CDCl}_3$ )  $\delta$  138.6, 137.9, 128.3, 127.6, 127.4, 91.2, 72.8, 72.5, 71.9, 70.3, 34.2, 30.2, 29.7, 29.0, 22.3, 18.9; **HRMS** ( $\text{CI}^+$ ) Calc. for  $\text{C}_{18}\text{H}_{25}\text{O}_2^{79}\text{Br}_2$   $[\text{M}+\text{H}]^+$  431.0216, found 431.0214.

To a solution of (2*R*,6*S*)-6-[4-benzyloxy]butyl]-2-[(2,2-dibromo-ethenyl)]tetrahydropyran (636 mg, 1.47 mmol) in THF (15 mL) at -78 °C was added *n*-BuLi (2.80 mL, 1.6 M solution in hexane, 4.48 mmol). After 45 min, the reaction mixture was quenched by addition of saturated aqueous NH<sub>4</sub>Cl (15 mL). The organics were extracted with EtOAc (3 × 15 mL), dried (Na<sub>2</sub>SO<sub>4</sub>), filtered and concentrated *in vacuo*. Purification by flash column chromatography (5% EtOAc/Hexane) provided alkyne **17b** (331 mg, 82%) as a colourless oil.

**R<sub>f</sub>** 0.73 (20% EtOAc/Hexane); [ $\alpha$ ]<sub>D</sub><sup>20</sup> -6.7 (*c* 1.04, CHCl<sub>3</sub>); **IR** (thin film) 3290, 2938, 2862, 1734, 1624, 1558 cm<sup>-1</sup>; **<sup>1</sup>H NMR** (400 MHz, CDCl<sub>3</sub>)  $\delta$  7.35-7.25 (5H, m, ArH), 4.75-4.74 (1H, m, H<sub>3</sub>), 4.50 (2H, s, OCH<sub>2</sub>Ar), 3.87-3.81 (1H, m, H<sub>7</sub>), 3.48 (2H, t, *J* = 6.6 Hz, H<sub>11</sub>), 2.45 (1H, d, *J* = 2.3 Hz, H<sub>1</sub>), 1.93-1.74 (2H, m, H<sub>4a</sub> + H<sub>5a</sub>), 1.70-1.58 (5H, m, H<sub>4b</sub> + H<sub>5b</sub> + H<sub>6a</sub> + H<sub>10</sub>), 1.53-1.38 (4H, m, H<sub>8-9</sub>), 1.27-1.17 (1H, m, H<sub>6b</sub>); **<sup>13</sup>C NMR** (100 MHz, CDCl<sub>3</sub>)  $\delta$  138.6, 128.3, 127.5, 127.4, 82.4, 74.1, 72.8, 71.4, 70.3, 64.8, 35.9, 31.3, 30.3, 29.6, 21.9, 19.2; **HRMS** (CI<sup>+</sup>) Calc. for C<sub>18</sub>H<sub>25</sub>O<sub>2</sub> [M+H]<sup>+</sup> 273.1849, found 273.1850.

#### 4-[(2*S'*,6*S'*)-6'-hexyltetrahydropyran-2-yl]-1-[(2*S''*,6*S''*)-6''-(hexyltetrahydropyran-2-yl)methyl]-1*H*-1,2,3-triazole (**18a**)

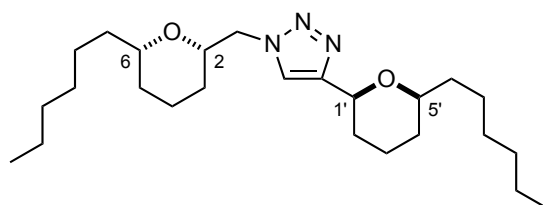

General procedure A was followed with alkyne **16a** (16.0 mg, 82.3  $\mu$ mol) and azide **11a** (19.0 mg, 84.3  $\mu$ mol) in *t*-BuOH (0.5 mL) and H<sub>2</sub>O (0.5 mL) to which was added CuSO<sub>4</sub>·5H<sub>2</sub>O (25.0 mg, 100  $\mu$ mol) and sodium ascorbate (40.0 mg, 202  $\mu$ mol). Standard workup and flash column chromatography (10% EtOAc/Hexane) provided triazole **18a** (25.2 mg, 71%) as a colourless oil.

**R<sub>f</sub>** 0.12 (10% EtOAc/Hexane); [ $\alpha$ ]<sub>D</sub><sup>20</sup> -25.6 (*c* 2.38, CHCl<sub>3</sub>); **IR** (thin film) 2934, 2859, 1456 cm<sup>-1</sup>; **<sup>1</sup>H NMR** (400 MHz, CDCl<sub>3</sub>)  $\delta$  7.64 (1H, s, H<sub>Ar</sub>), 4.59 (1H, dd, *J* = 11.1, 2.1 Hz, H<sub>1'</sub>), 4.45 (1H, dd, *J* = 14.0, 3.1 Hz, H<sub>1a</sub>), 4.18 (1H, dd, *J* = 14.1, 8.2 Hz, H<sub>1b</sub>), 3.66-3.60 (1H, m, H<sub>2</sub>), 3.49-3.42 (1H, m, H<sub>5'</sub>), 3.23-3.17 (1H, m, H<sub>6</sub>), 2.03-1.99 (1H, m, H<sub>2a'</sub>), 1.95-1.82 (2H, m, H<sub>3a'</sub> + H<sub>4a</sub>), 1.68-1.50 (6H, m, H<sub>2b'</sub> + H<sub>3a</sub> + H<sub>3b'</sub> + H<sub>4a'</sub> + H<sub>4b</sub> + H<sub>5a</sub>), 1.49-1.11 (23H, m, H<sub>3b</sub> + H<sub>4b'</sub> + H<sub>5b</sub> + H<sub>6'-10'</sub> + H<sub>7-11</sub>), 0.89-0.84 (6H, m, H<sub>11'</sub> + H<sub>12</sub>); **<sup>13</sup>C**

**NMR** (100 MHz, CDCl<sub>3</sub>)  $\delta$  149.9, 122.2, 78.4, 77.8, 76.1, 73.2, 55.0, 36.5, 36.4, 31.8, 31.8, 31.8, 31.2, 31.2, 29.4, 29.3, 28.6, 25.6, 25.5, 23.6, 23.0, 22.6, 22.6, 14.1, 14.1; **HRMS** (ES<sup>+</sup>) Calc. for C<sub>25</sub>H<sub>46</sub>O<sub>2</sub>N<sub>3</sub> [M+H]<sup>+</sup> 420.3585, found 420.3580

**4-[(2*S'*,6*S'*)-6'-(4-(benzyloxy)butyl)tetrahydropyran-2-yl]-1-[(2*S''*,6*S''*)-6''-(hexyltetrahydropyran-2-yl)methyl]-1*H*-1,2,3-triazole (18b)**

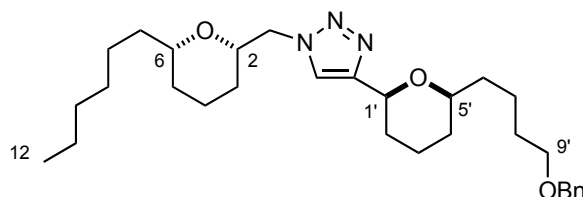

General procedure A was followed with alkyne **16b** (59.0 mg, 0.22 mmol) and azide **11a** (48.7 mg, 0.22 mmol) in *t*-BuOH (1 mL) and H<sub>2</sub>O (1 mL) to which was added CuSO<sub>4</sub>·5H<sub>2</sub>O (65.0 mg, 0.26 mmol) and sodium ascorbate (103 mg, 0.52 mmol). Standard work-up and purification by flash column chromatography (10→25% EtOAc/Hexane) provided triazole **18b** (75.1 mg, 70%) as a colourless oil.

**R<sub>f</sub>** 0.47 (30% EtOAc/Hexane); [ $\alpha$ ]<sub>D</sub><sup>20</sup> -24.5 (*c* 1.06, CHCl<sub>3</sub>); **IR** (thin film) 2934, 2857, 1719, 1454 cm<sup>-1</sup>; **<sup>1</sup>H NMR** (300 MHz, CDCl<sub>3</sub>)  $\delta$  7.64 (1H, s, H<sub>Ar</sub>), 7.36-7.24 (5H, m, ArH), 4.61-4.58 (1H, m, H<sub>1'</sub>), 4.48 (2H, s, OCH<sub>2</sub>Ar), 4.48-4.42 (1H, m, H<sub>1a</sub>), 4.17 (1H, dd, *J* = 14.0, 8.2 Hz, H<sub>1b</sub>), 3.65-3.59 (1H, m, H<sub>2</sub>), 3.51-3.43 (1H, m, H<sub>5'</sub>), 3.46 (2H, t, *J* = 6.4 Hz, H<sub>9'</sub>), 3.22-3.16 (1H, m, H<sub>6</sub>), 2.03-1.82 (3H, m, H<sub>3a'</sub> + H<sub>4</sub>), 1.66-1.41 (12H, m, H<sub>2'</sub> + H<sub>3a</sub> + H<sub>3b'</sub> + H<sub>4a'</sub> + H<sub>5a</sub> + H<sub>6'</sub> + H<sub>8'</sub> + H<sub>10</sub>), 1.38-1.11 (13H, m, H<sub>3b</sub> + H<sub>4b'</sub> + H<sub>5b</sub> + H<sub>7-9</sub> + H<sub>7'</sub> + H<sub>11</sub>), 0.87 (3H, t, *J* = 6.4 Hz, H<sub>12</sub>); **<sup>13</sup>C NMR** (75 MHz, CDCl<sub>3</sub>)  $\delta$  149.9, 138.7, 128.3, 127.6, 127.4, 122.3, 78.3, 77.8, 76.1, 73.2, 72.9, 70.4, 55.0, 36.4, 36.3, 31.9, 31.8, 31.3, 31.2, 29.8, 29.3, 28.6, 25.6, 23.6, 23.0, 22.6, 22.2, 14.1; **HRMS** (ES<sup>+</sup>) Calc. for C<sub>30</sub>H<sub>48</sub>O<sub>3</sub>N<sub>3</sub> [M+H]<sup>+</sup> 498.3690, found 498.3693.

**1-[(2*S'*,6*S'*)-6'-(4-(benzyloxy)butyl)tetrahydropyran-2-yl)methyl]-4-[(2*S''*,6*S''*)-6''-(hexyltetrahydropyran-2-yl)]-1*H*-1,2,3-triazole (18c)**

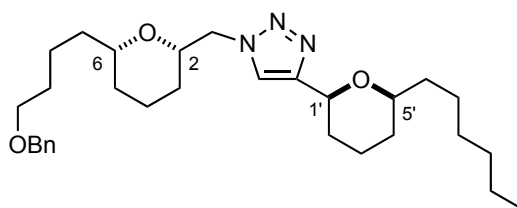

General procedure A was followed with alkyne **16a** (26.0 mg, 0.14 mmol) and azide **11b** (41.0 mg, 0.14 mmol) in *t*-BuOH (2 mL) and H<sub>2</sub>O (2 mL) to which was added CuSO<sub>4</sub>·5H<sub>2</sub>O (40.0 mg, 0.16 mmol) and sodium ascorbate (64.0 mg, 0.32 mmol). Standard work-up and purification by flash column chromatography (15% EtOAc/Hexane) provided triazole **18c** (27.0 mg, 41%) as a colourless oil.

**R<sub>f</sub>** 0.43 (30% EtOAc/Hexane); [ $\alpha$ ]<sub>D</sub><sup>20</sup> -23.5 (*c* 1.0, CHCl<sub>3</sub>); **IR** (thin film) 2934, 2857, 1456 cm<sup>-1</sup>; **<sup>1</sup>H NMR** (500 MHz, CDCl<sub>3</sub>)  $\delta$  7.62 (1H, s, H<sub>Ar</sub>), 7.35-7.31 (4H, m, ArH), 7.28-7.27 (1H, m, ArH), 4.59-4.57 (1H, m, H<sub>1'</sub>), 4.49 (2H, s, OCH<sub>2</sub>Ar), 4.44 (1H, dd, *J* = 14.0, 3.2 Hz, H<sub>1a</sub>), 4.20 (1H, dd, *J* = 14.0, 7.9 Hz, H<sub>1b</sub>), 3.66-3.62 (1H, m, H<sub>2</sub>), 3.46-3.41 (3H, m, H<sub>5'</sub> + H<sub>10</sub>), 3.24-3.19 (1H, m, H<sub>6</sub>), 2.02-2.00 (1H, m, H<sub>2a'</sub>), 1.91-1.84 (2H, m, H<sub>3a'</sub> + H<sub>4a</sub>), 1.65-1.37 (14H, m, H<sub>2b'</sub> + H<sub>3a</sub> + H<sub>3b'</sub> + H<sub>4a'</sub> + H<sub>4b</sub> + H<sub>5a</sub> + H<sub>6'</sub> + H<sub>7</sub> + H<sub>9</sub> + H<sub>9'</sub>), 1.35-1.12 (11H, m, H<sub>3b</sub> + H<sub>4b'</sub> + H<sub>5b</sub> + H<sub>7'-8'</sub> + H<sub>8</sub> + H<sub>10'</sub>), 0.86 (3H, t, *J* = 6.7 Hz, H<sub>11'</sub>); **<sup>13</sup>C NMR** (125 MHz, CDCl<sub>3</sub>)  $\delta$  149.9, 138.5, 128.3, 127.5, 127.4, 122.2, 78.4, 77.6, 76.0, 73.1, 72.8, 70.3, 55.0, 36.5, 36.0, 31.8, 31.7, 31.2, 31.1, 29.6, 29.4, 28.5, 25.5, 23.6, 22.9, 22.6, 22.1, 14.1; **HRMS** (Cl<sup>+</sup>) Calc. for C<sub>30</sub>H<sub>48</sub>O<sub>3</sub>N<sub>3</sub> [M+H]<sup>+</sup> 498.3690, found 498.3686.

**4-[(2*S'*,6*S'*)-6'-(4-(benzyloxy)butyl)tetrahydropyran-2-yl]-1-[(2*S''*,6*S''*)-6''-((4-((*tert*-butyldiphenylsilyl)oxy)butyl)tetrahydropyran-2-yl)methyl]-1*H*-1,2,3-triazole (18d)**

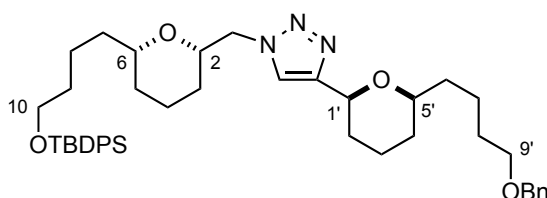

General procedure A was followed with alkyne **16b** (250 mg, 0.920 mmol) and azide **11c** (415 mg, 0.920 mmol) in *t*-BuOH (4 mL) and H<sub>2</sub>O (4 mL) to which was added CuSO<sub>4</sub>·5H<sub>2</sub>O (276 mg, 1.10 mmol) and sodium ascorbate (437 mg, 2.21 mmol). Standard

work-up and purification by flash column chromatography (30% EtOAc/Hexane) provided triazole **18d** (450 mg, 68%) as a colourless oil.

**R<sub>f</sub>** 0.25 (50% EtOAc/Hexane);  $[\alpha]_D^{20}$  -13.3 (*c* 0.9, CHCl<sub>3</sub>); **IR** (thin film) 2933, 2857, 1472 cm<sup>-1</sup>; **<sup>1</sup>H NMR** (300 MHz, CDCl<sub>3</sub>)  $\delta$  7.67-7.64 (4H, m, ArH), 7.58 (1H, s, H<sub>Ar</sub>), 7.42-7.26 (11H, m, ArH), 4.56 (1H, dd, *J* = 10.7, 1.8 Hz, H<sub>1'</sub>), 4.48 (2H, s, OCH<sub>2</sub>Ar), 4.42 (1H, dd, *J* = 14.0, 3.5 Hz, H<sub>1a</sub>), 4.19 (1H, dd, *J* = 14.0, 7.8 Hz, H<sub>1b</sub>), 3.64-3.60 (1H, m, H<sub>2</sub>), 3.64 (2H, t, *J* = 6.5 Hz, H<sub>10</sub>), 3.47-3.39 (1H, m, H<sub>5'</sub>), 3.45 (2H, t, *J* = 6.5 Hz, H<sub>9'</sub>), 3.23-3.13 (1H, m, H<sub>6</sub>), 1.99-1.83 (3H, m, H<sub>3a'</sub> + H<sub>4</sub>), 1.66-1.31 (16H, m, H<sub>2'</sub> + H<sub>3a</sub> + H<sub>3b'</sub> + H<sub>4'</sub> + H<sub>5</sub> + H<sub>7</sub> + H<sub>6'-8'</sub>), 1.31-1.08 (5H, m, H<sub>3b</sub> + H<sub>8-9</sub>), 1.04 (9H, s, SiC(CH<sub>3</sub>)<sub>3</sub>); **<sup>13</sup>C NMR** (75 MHz, CDCl<sub>3</sub>)  $\delta$  150.0, 138.8, 135.7, 134.2, 129.7, 128.5, 127.8, 127.7, 127.6, 122.4, 78.4, 77.8, 76.2, 73.3, 73.0, 70.5, 63.9, 55.1, 36.4, 36.1, 32.6, 31.8, 31.3, 31.2, 29.9, 28.8, 27.0, 23.7, 23.1, 22.3, 21.8, 19.3; **HRMS** (ES<sup>+</sup>) Calc. for C<sub>44</sub>H<sub>62</sub>O<sub>4</sub>N<sub>3</sub>Si [M+H]<sup>+</sup> 724.4504, found 724.4493.

#### 4-[(2*R'*,6*S'*)-6'-hexyltetrahydropyran-2-yl]-1-[(2*S''*',6*S''*')-6''-(hexyltetrahydropyran-2-yl)methyl]-1*H*-1,2,3-triazole (**19a**)

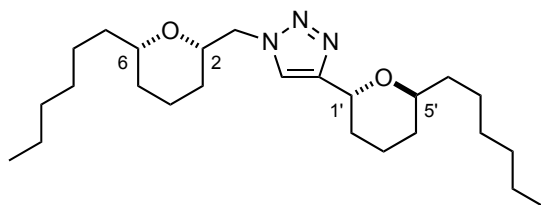

General procedure A was followed with alkyne **17a** (12.3 mg, 63.0  $\mu$ mol) and azide **11a** (14.3 mg, 63.0  $\mu$ mol) in *t*-BuOH (0.5 mL) and H<sub>2</sub>O (0.5 mL) to which was added CuSO<sub>4</sub>·5H<sub>2</sub>O (19.0 mg, 76.0  $\mu$ mol) and sodium ascorbate (30.0 mg, 150  $\mu$ mol). Standard work-up and purification by flash column chromatography (5→10% EtOAc/Hexane) provided triazole **19a** (20.0 mg, 75%) as a colourless oil.

**R<sub>f</sub>** 0.14 (15% EtOAc/Hexane);  $[\alpha]_D^{20}$  -31.7 (*c* 0.53, CHCl<sub>3</sub>); **IR** (thin film) 2930, 2857, 1456, 1438, 1377 cm<sup>-1</sup>; **<sup>1</sup>H NMR** (400 MHz, CDCl<sub>3</sub>)  $\delta$  7.64 (1H, s, H<sub>Ar</sub>), 5.08 (1H, t, *J* = 4.3 Hz, H<sub>1'</sub>), 4.48 (1H, dd, *J* = 14.1, 3.1 Hz, H<sub>1a</sub>), 4.26 (1H, dd, *J* = 14.1, 7.8 Hz, H<sub>1b</sub>), 3.69-3.63 (1H, m, H<sub>2</sub>), 3.59-3.53 (1H, m, H<sub>5'</sub>), 3.26-3.20 (1H, m, H<sub>6</sub>), 2.23-2.16 (1H, m, H<sub>2a'</sub>), 2.02-1.94 (1H, m, H<sub>2b'</sub>), 1.89-1.83 (1H, m, H<sub>4a</sub>), 1.77-1.46 (7H, m, H<sub>3'</sub> + H<sub>4a'</sub> + H<sub>4b</sub> + H<sub>5a</sub> + H<sub>6'</sub>), 1.43-1.36 (3H, m, H<sub>4b'</sub> + H<sub>7</sub>), 1.33-1.09 (19H, m, H<sub>3</sub> + H<sub>5b</sub> + H<sub>7'-10'</sub> + H<sub>8-11</sub>), 0.88 (6H, t, *J* = 6.6 Hz, H<sub>11'</sub> + H<sub>12</sub>); **<sup>13</sup>C NMR** (125 MHz, CDCl<sub>3</sub>)  $\delta$  148.6, 123.3, 77.9,

76.1, 71.6, 67.8, 55.1, 36.3, 34.9, 31.8, 31.8, 31.2, 30.7, 29.5, 29.3, 28.5, 28.5, 25.7, 25.5, 23.0, 22.7, 22.6, 19.2, 14.1; **HRMS** (ES<sup>+</sup>) Calc. for C<sub>25</sub>H<sub>46</sub>O<sub>2</sub>N<sub>3</sub> [M+H]<sup>+</sup> 420.3585, found 420.3580.

**4-[(2*R*',6*S*')-6'-(4-(benzyloxy)butyl)tetrahydropyran-2-yl]-1-[(2*S*'',6*S*'')-6''-(hexyltetrahydropyran-2-yl)methyl]-1*H*-1,2,3-triazole (19b)**

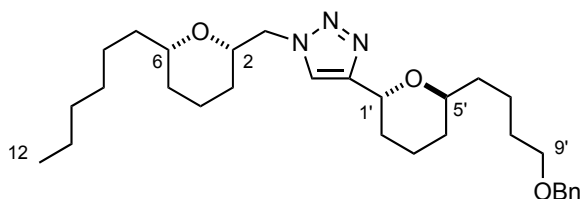

General procedure A was followed with alkyne **17b** (50.0 mg, 0.18 mmol) and azide **11a** (41.2 mg, 0.18 mmol) in *t*-BuOH (1 mL) and H<sub>2</sub>O (1 mL) to which was added CuSO<sub>4</sub>·5H<sub>2</sub>O (55.0 mg, 0.22 mmol) and sodium ascorbate (87.0 mg, 0.44 mmol). Standard work-up and purification by flash column chromatography (10→30% EtOAc/Hexane) provided triazole **19b** (58.7 mg, 65%) as a colourless oil.

**R<sub>f</sub>** 0.28 (30% EtOAc/Hexane); [α]<sub>D</sub><sup>20</sup> -22.8 (*c* 1.0, CHCl<sub>3</sub>); **IR** (thin film) 2932, 2857, 1719, 1454 cm<sup>-1</sup>; **<sup>1</sup>H NMR** (300 MHz, CDCl<sub>3</sub>) δ 7.63 (1H, s, H<sub>Ar</sub>), 7.36-7.23 (5H, m, ArH), 5.09-5.05 (1H, m, H<sub>1'</sub>), 4.49 (2H, s, OCH<sub>2</sub>Ar), 4.49-4.42 (1H, m, H<sub>1a</sub>), 4.23 (1H, dd, *J* = 14.0, 7.9 Hz, H<sub>1b</sub>), 3.67-3.54 (2H, m, H<sub>2</sub> + H<sub>5'</sub>), 3.46 (2H, t, *J* = 6.5 Hz, H<sub>9'</sub>), 3.23-3.17 (1H, m, H<sub>6</sub>), 2.24-2.13 (1H, m, H<sub>2a'</sub>), 2.04-1.91 (1H, m, H<sub>2b'</sub>), 1.89-1.80 (1H, m, H<sub>4a</sub>), 1.77-1.69 (2H, m, H<sub>3'</sub>), 1.67-1.34 (10H, m, H<sub>4'</sub> + H<sub>4b</sub> + H<sub>5a</sub> + H<sub>6'</sub> + H<sub>7</sub> + H<sub>8'</sub>), 1.30-1.08 (13H, m, H<sub>3</sub> + H<sub>5b</sub> + H<sub>7'</sub> + H<sub>8-11</sub>), 0.87 (3H, t, *J* = 6.5 Hz, H<sub>12</sub>); **<sup>13</sup>C NMR** (75 MHz, CDCl<sub>3</sub>) δ 148.5, 138.6, 128.3, 127.5, 127.4, 123.3, 77.8, 76.0, 72.8, 71.3, 70.3, 67.8, 55.0, 36.3, 34.6, 31.7, 31.2, 30.6, 29.8, 29.2, 28.5, 28.4, 25.4, 23.0, 22.6, 22.2, 19.1, 14.0; **HRMS** (ES<sup>+</sup>) Calc. for C<sub>30</sub>H<sub>48</sub>O<sub>3</sub>N<sub>3</sub> [M+H]<sup>+</sup> 498.3690, found 498.3692.

4-[(2*R*',6*S*')-6'-hexyltetrahydropyran-2-yl]-1-[(2*R*'',6*S*'')-6''-(hexyltetrahydropyran-2-yl)methyl]-1*H*-1,2,3-triazole (**20a**)

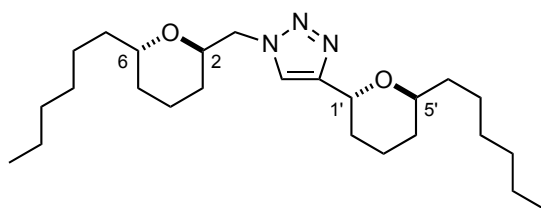

General procedure A was followed with alkyne **17a** (16.1 mg, 83.0  $\mu\text{mol}$ ) and azide **12** (18.7 mg, 83.0  $\mu\text{mol}$ ) in *t*-BuOH (1 mL) and H<sub>2</sub>O (1 mL) to which was added CuSO<sub>4</sub>·5H<sub>2</sub>O (25.0 mg, 99.0  $\mu\text{mol}$ ) and sodium ascorbate (39.0 mg, 199  $\mu\text{mol}$ ). Standard work-up and purification by flash column chromatography (5→10% EtOAc/Hexane) provided triazole **20a** (17.8 mg, 51%) as a colourless oil.

**R<sub>f</sub>** 0.30 (15% EtOAc/Hexane);  $[\alpha]_{\text{D}}^{20}$  -41.4 (*c* 0.73, CHCl<sub>3</sub>); **IR** (thin film) 2930, 2857, 1772, 1734, 1558, 1456 cm<sup>-1</sup>; **<sup>1</sup>H NMR** (400 MHz, CDCl<sub>3</sub>)  $\delta$  7.58 (1H, s, H<sub>Ar</sub>), 5.07 (1H, t, *J* = 4.4 Hz, H<sub>1'</sub>), 4.43-4.32 (2H, m, H<sub>1</sub>), 4.02-3.96 (1H, m, H<sub>2</sub>), 3.83-3.78 (1H, m, H<sub>5'</sub>), 3.61-3.55 (1H, m, H<sub>6</sub>), 2.19-2.12 (1H, m, H<sub>2a'</sub>), 2.00-1.92 (1H, m, H<sub>2b'</sub>), 1.76-1.59 (7H, m, H<sub>3a</sub> + H<sub>3'</sub> + H<sub>4</sub> + H<sub>4a'</sub> + H<sub>5a</sub>), 1.45-1.34 (5H, m, H<sub>5b</sub> + H<sub>6'</sub> + H<sub>7</sub>), 1.33-1.15 (18H, m, H<sub>3b</sub> + H<sub>4b'</sub> + H<sub>7'-10'</sub> + H<sub>8-11</sub>), 0.88-0.83 (6H, m, H<sub>11'</sub> + H<sub>12</sub>); **<sup>13</sup>C NMR** (125 MHz, CDCl<sub>3</sub>)  $\delta$  148.7, 123.1, 72.4, 71.7, 69.0, 67.8, 53.8, 34.6, 31.8, 31.7, 31.6, 30.6, 29.4, 29.2, 28.9, 28.7, 28.0, 25.7, 25.6, 22.6 (2C), 19.1, 18.1, 14.1, 14.0; **HRMS** (ES<sup>+</sup>) Calc. for C<sub>25</sub>H<sub>46</sub>O<sub>2</sub>N<sub>3</sub> [M+H]<sup>+</sup> 420.3585, found 420.3581.

4-[(2*R*',6*S*')-6'-4-(benzyloxy)butyltetrahydropyran-2-yl]-1-[(2*R*'',6*S*'')-6''-(hexyltetrahydropyran-2-yl)methyl]-1*H*-1,2,3-triazole (**20b**)

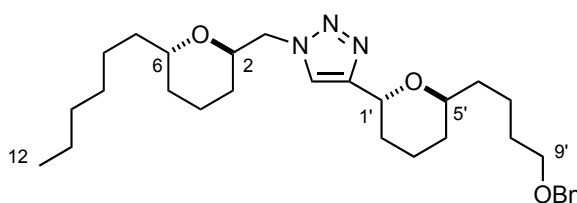

General procedure A was followed with alkyne **17b** (58.0 mg, 0.21 mmol) and azide **12** (47.9 mg, 0.21 mmol) in *t*-BuOH (1 mL) and H<sub>2</sub>O (1 mL) to which was added CuSO<sub>4</sub>·5H<sub>2</sub>O (64.0 mg, 0.26 mmol) and sodium ascorbate (100 mg, 0.51 mmol). Standard

work-up and purification by flash column chromatography (15→25% EtOAc/Hexane) provided triazole **20b** (81.2 mg, 77%) as a colourless oil.

**R<sub>f</sub>** 0.41 (30% EtOAc/Hexane);  $[\alpha]_{\text{D}}^{20}$  -34.1 (*c* 1.03, CHCl<sub>3</sub>); **IR** (thin film) 2932, 2859, 1719, 1454 cm<sup>-1</sup>; **<sup>1</sup>H NMR** (300 MHz, CDCl<sub>3</sub>) δ 7.58 (1H, s, H<sub>Ar</sub>), 7.33-7.23 (5H, m, ArH), 5.07 (1H, t, *J* = 4.5 Hz, H<sub>1'</sub>), 4.49 (2H, s, OCH<sub>2</sub>Ar), 4.43-4.28 (1H, m, H<sub>1</sub>), 4.02-3.94 (1H, m, H<sub>2</sub>), 3.83-3.75 (1H, m, H<sub>5'</sub>), 3.62-3.54 (1H, m, H<sub>6</sub>), 3.46 (2H, t, *J* = 6.4 Hz, H<sub>9'</sub>), 2.21-2.12 (1H, m, H<sub>2a'</sub>), 2.04-1.91 (1H, m, H<sub>2b'</sub>), 1.77-1.50 (13H, m, H<sub>3a</sub> + H<sub>3'</sub> + H<sub>4a'</sub> + H<sub>4</sub> + H<sub>5a</sub> + H<sub>6'</sub> + H<sub>7</sub> + H<sub>8'</sub>), 1.47-1.32 (2H, m, H<sub>4b'</sub> + H<sub>5b</sub>), 1.30-1.03 (11H, m, H<sub>3b</sub> + H<sub>7'</sub> + H<sub>8-11</sub>), 0.85 (3H, t, *J* = 6.7 Hz, H<sub>12</sub>); **<sup>13</sup>C NMR** (75 MHz, CDCl<sub>3</sub>) δ 148.6, 138.6, 128.3, 127.5, 127.4, 123.0, 72.8, 72.3, 71.4, 70.3, 69.0, 67.9, 53.6, 34.5, 31.7, 31.6, 30.6, 29.8, 29.2, 28.9, 28.6, 27.9, 25.6, 22.6, 22.2, 19.1, 18.1, 14.0; **HRMS** (ES<sup>+</sup>) Calc. for C<sub>30</sub>H<sub>48</sub>O<sub>3</sub>N<sub>3</sub> [M+H]<sup>+</sup> 498.3690, found 498.3693.

**4-[(2*S'*,6*S'*)-6'-hexyltetrahydropyran-2-yl]-1-[(2*R''*,6*S''*)-6''-(hexyltetrahydropyran-2-yl)methyl]-1*H*-1,2,3-triazole (**21a**)**

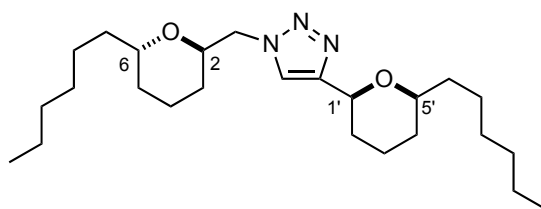

General procedure A was followed with alkyne **16a** (12.0 mg, 62.0 μmol) and azide **12** (21.1 mg, 93.7 μmol) in *t*-BuOH (0.5 mL) and H<sub>2</sub>O (0.5 mL) to which was added CuSO<sub>4</sub>·5H<sub>2</sub>O (19.0 mg, 74.0 μmol) and sodium ascorbate (29.0 mg, 150 μmol). Standard work-up and purification by flash column chromatography (5→10% EtOAc/Hexane) provided triazole **21a** (9.0 mg, 35%) as a colourless oil.

**R<sub>f</sub>** 0.09 (10% EtOAc/Hexane);  $[\alpha]_{\text{D}}^{20}$  -45.7 (*c* 0.35, CHCl<sub>3</sub>); **IR** (thin film) 2926, 2855, 1456 cm<sup>-1</sup>; **<sup>1</sup>H NMR** (500 MHz, CDCl<sub>3</sub>) δ 7.60 (1H, s, H<sub>Ar</sub>), 4.58 (1H, d, *J* = 10.6 Hz, H<sub>1'</sub>), 4.38 (2H, d, *J* = 6.1 Hz, H<sub>1</sub>), 4.03-3.98 (1H, m, H<sub>2</sub>), 3.83-3.78 (1H, m, H<sub>5'</sub>), 3.45 (1H, dtd, *J* = 11.7, 4.9, 1.5 Hz, H<sub>6</sub>), 2.08 (1H, d, *J* = 11.4 Hz, H<sub>2a'</sub>), 1.94-1.91 (1H, m, H<sub>2b'</sub>), 1.71-1.53 (7H, m, H<sub>3a</sub> + H<sub>3'</sub> + H<sub>4</sub> + H<sub>4a'</sub> + H<sub>5a</sub>), 1.43-1.20 (23H, m, H<sub>3b</sub> + H<sub>4b'</sub> + H<sub>5b</sub> + H<sub>6'-10'</sub> + H<sub>7-11</sub>), 1.33-1.15 (18H, m, H<sub>11'</sub> + H<sub>12</sub>); **<sup>13</sup>C NMR** (125 MHz, CDCl<sub>3</sub>) δ 148.2, 121.9, 78.6, 73.4, 72.3, 69.4, 53.5, 36.7, 32.1, 32.0 (2C), 31.9, 31.4, 29.6, 29.3, 29.2,



28.1, 25.7, 25.6, 23.7, 22.8, 22.7, 18.4, 14.3, 14.2; **HRMS** (ES<sup>+</sup>) Calc. for C<sub>25</sub>H<sub>45</sub>O<sub>2</sub>N<sub>3</sub>Na [M+Na]<sup>+</sup> 442.3404, found 442.3393.

**4-[(2*S'*,6*S'*)-6'-(4-(benzyloxy)butyl)tetrahydropyran-2-yl]-1-[(2*R''*,6*S''*)-6''-(hexyltetrahydropyran-2-yl)methyl]-1*H*-1,2,3-triazole (21b)**

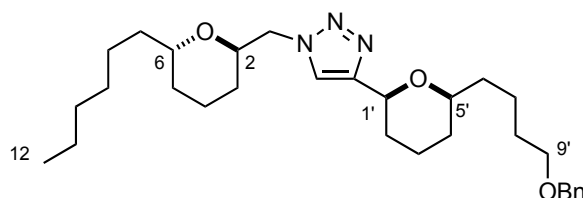

General procedure A was followed with alkyne **16b** (57.0 mg, 0.21 mmol) and azide **12** (46.8 mg, 0.21 mmol) in *t*-BuOH (1 mL) and H<sub>2</sub>O (1 mL) to which was added CuSO<sub>4</sub>·5H<sub>2</sub>O (62.0 mg, 0.25 mmol) and sodium ascorbate (99.0 mg, 0.50 mmol). Standard work-up and purification by flash column chromatography (15→30% EtOAc/Hexane) provided triazole **21b** (78.6 mg, 76%) as a colourless oil.

**R<sub>f</sub>** 0.22 (30% EtOAc/Hexane); [α]<sub>D</sub><sup>20</sup> -36.0 (*c* 1.05, CHCl<sub>3</sub>); **IR** (thin film) 2932, 2857, 1717, 1454 cm<sup>-1</sup>; **<sup>1</sup>H NMR** (300 MHz, CDCl<sub>3</sub>) δ 7.57 (1H, s, H<sub>Ar</sub>), 7.33-7.22 (5H, m, ArH), 4.59-4.54 (1H, m, H<sub>1'</sub>), 4.48 (2H, s, OCH<sub>2</sub>Ar), 4.36-4.34 (2H, m, H<sub>1</sub>), 4.02-3.95 (1H, m, H<sub>2</sub>), 3.81-3.76 (1H, m, H<sub>5'</sub>), 3.49-3.41 (1H, m, H<sub>6</sub>), 3.46 (2H, t, *J* = 6.4 Hz, H<sub>9'</sub>), 2.08-2.03 (1H, m, H<sub>2a'</sub>), 1.95-1.86 (1H, m, H<sub>4a</sub>), 1.65-1.40 (13H, m, H<sub>2b'</sub> + H<sub>3a</sub> + H<sub>3'</sub> + H<sub>4a'</sub> + H<sub>4b</sub> + H<sub>5a</sub> + H<sub>6'</sub> + H<sub>7</sub> + H<sub>8'</sub>), 1.37-1.04 (13H, m, H<sub>3b</sub> + H<sub>4b'</sub> + H<sub>5b</sub> + H<sub>7'</sub> + H<sub>8-11</sub>), 0.85 (3H, t, *J* = 6.6 Hz, H<sub>12</sub>); **<sup>13</sup>C NMR** (75 MHz, CDCl<sub>3</sub>) δ 149.9, 138.5, 128.2, 127.5, 127.3, 121.6, 78.1, 73.2, 72.8, 72.0, 70.3, 69.1, 53.2, 36.2, 31.9, 31.7, 31.5, 31.1, 29.7, 29.1, 29.0, 27.8, 25.5, 23.5, 22.5, 22.1, 18.1, 14.0; **HRMS** (ES<sup>+</sup>) Calc. for C<sub>30</sub>H<sub>48</sub>O<sub>3</sub>N<sub>3</sub> [M+H]<sup>+</sup> 498.3690, found 498.3693.

**4-[(2*S'*,6*S'*)-6'-(4-(benzyloxy)butyl)tetrahydropyran-2-yl]-1-[(2*R''*,6*R''*)-6''-(hexyltetrahydropyran-2-yl)methyl]-1*H*-1,2,3-triazole (22)**

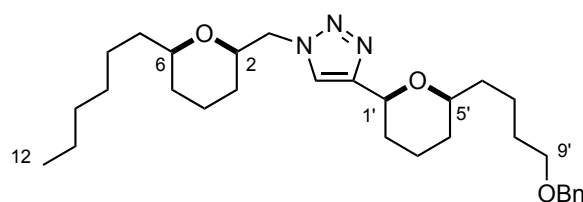

General procedure A was followed with alkyne **16b** (58.0 mg, 0.21 mmol) and azide **13** (47.9 mg, 0.21 mmol) in *t*-BuOH (1 mL) and H<sub>2</sub>O (1 mL) to which was added CuSO<sub>4</sub>·5H<sub>2</sub>O (64.0 mg, 0.26 mmol) and sodium ascorbate (101 mg, 0.51 mmol). Standard work-up and purification by flash column chromatography (10→20% EtOAc/Hexane) provided triazole **22** (45.6 mg, 43%) as a colourless oil.

**R<sub>f</sub>** 0.43 (30% EtOAc/Hexane); [ $\alpha$ ]<sub>D</sub><sup>20</sup> -19.4 (*c* 0.66, CHCl<sub>3</sub>); **IR** (thin film) 2932, 2857, 1755, 1732, 1454 cm<sup>-1</sup>; **<sup>1</sup>H NMR** (300 MHz, CDCl<sub>3</sub>)  $\delta$  7.64 (1H, s, H<sub>Ar</sub>), 7.34-7.27 (5H, m, ArH), 4.61-4.57 (1H, m, H<sub>1'</sub>), 4.49 (2H, s, OCH<sub>2</sub>Ar), 4.45 (1H, dd, *J* = 14.0, 3.2 Hz, H<sub>1a</sub>), 4.21 (1H, dd, *J* = 14.1, 8.0 Hz, H<sub>1b</sub>), 3.68-3.60 (1H, m, H<sub>2</sub>), 3.51-3.43 (1H, m, H<sub>5'</sub>), 3.47 (2H, t, *J* = 6.5 Hz, H<sub>9'</sub>), 3.26-3.18 (1H, m, H<sub>6</sub>), 2.08-2.04 (1H, m, H<sub>2a'</sub>), 1.98-1.81 (2H, m, H<sub>3a'</sub> + H<sub>4a</sub>), 1.69-1.43 (12H, m, H<sub>2b'</sub> + H<sub>3a</sub> + H<sub>3b'</sub> + H<sub>4a'</sub> + H<sub>4b</sub> + H<sub>5a</sub> + H<sub>6'</sub> + H<sub>7</sub> + H<sub>8'</sub>), 1.41-1.10 (13H, m, H<sub>3b</sub> + H<sub>4b'</sub> + H<sub>5b</sub> + H<sub>7'</sub> + H<sub>8-11</sub>), 0.88 (3H, t, *J* = 6.6 Hz, H<sub>12</sub>); **<sup>13</sup>C NMR** (125 MHz, CDCl<sub>3</sub>)  $\delta$  149.6, 138.6, 128.3, 127.6, 127.4, 122.3, 78.2, 77.7, 76.0, 73.0, 72.8, 70.3, 55.0, 36.3, 36.2, 31.8, 31.5, 31.1 (2C), 29.8, 29.2, 28.6, 25.4, 23.5, 23.0, 22.6, 22.1, 14.1; **HRMS** (ES<sup>+</sup>) Calc. for C<sub>30</sub>H<sub>48</sub>O<sub>3</sub>N<sub>3</sub> [M+H]<sup>+</sup> 498.3690, found 498.3680.

**1-[(2*S'*,6*S'*)-6'-(hexyltetrahydropyran-2-yl)methyl]-4-[(2*S''*,6*S''*)-6''-(4-hydroxybutyl) tetrahydropyran-2-yl]-1*H*-1,2,3-triazole (**23**)**

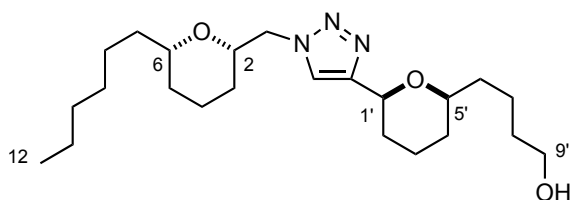

General procedure B was followed with benzyl ether **18b** (17.3 mg, 35.0  $\mu$ mol) in EtOH (2 mL) to which was added Pd(OH)<sub>2</sub> on carbon (4.90 mg, 20% wt on carbon, 6.95  $\mu$ mol). Standard work-up and purification by flash column chromatography (50→70% EtOAc/Hexane) provided alcohol **23** (13.1 mg, 92%), as a colourless oil.

**R<sub>f</sub>** 0.14 (50% EtOAc/Hexane); [ $\alpha$ ]<sub>D</sub><sup>20</sup> -25.2 (*c* 0.5, CHCl<sub>3</sub>); **IR** (thin film) 3431, 2934, 2859, 1751, 1456 cm<sup>-1</sup>; **<sup>1</sup>H NMR** (300 MHz, CDCl<sub>3</sub>)  $\delta$  7.64 (1H, s, H<sub>Ar</sub>), 4.62-4.58 (1H, m, H<sub>1'</sub>), 4.46 (1H, dd, *J* = 14.0, 3.1 Hz, H<sub>1a</sub>), 4.18 (1H, dd, *J* = 14.0, 8.3 Hz, H<sub>1b</sub>), 3.67-3.59 (3H, m, H<sub>2</sub> + H<sub>9'</sub>), 3.51-3.45 (1H, m, H<sub>5'</sub>), 3.22-3.16 (1H, m, H<sub>6</sub>), 2.02-1.74 (3H, m, H<sub>2a'</sub> + H<sub>3a'</sub> + H<sub>4a</sub>), 1.67-1.41 (12H, m, H<sub>2b'</sub> + H<sub>3a</sub> + H<sub>3b'</sub> + H<sub>4a'</sub> + H<sub>4b</sub> + H<sub>5a</sub> + H<sub>6'</sub> + H<sub>7</sub> + H<sub>8'</sub>), 1.38-1.14 (13H, m, H<sub>3b</sub> + H<sub>4b'</sub> + H<sub>5b</sub> + H<sub>7'</sub> + H<sub>8-11</sub>), 0.87 (3H, t, *J* = 6.5 Hz, H<sub>12</sub>); **<sup>13</sup>C NMR** (125

MHz, CDCl<sub>3</sub>)  $\delta$  149.5, 122.6, 78.3, 77.8, 76.0, 72.8, 62.8, 55.2, 36.3, 36.0, 32.6, 31.9, 31.6, 31.2, 31.2, 29.3, 28.6, 25.6, 23.5, 23.0, 22.6, 21.7, 14.1; **HRMS** (ES<sup>+</sup>) Calc. for C<sub>23</sub>H<sub>42</sub>O<sub>3</sub>N<sub>3</sub> [M+H]<sup>+</sup> 408.3221, found 408.3221.

**1-[(2*S*',6*S*')-6'-(hexyltetrahydropyran-2-yl)methyl]-4-[(2*R*'',6*S*'')-6''-(4-hydroxybutyl) tetrahydropyran-2-yl]-1*H*-1,2,3-triazole (24)**

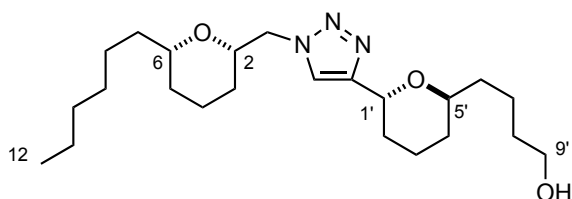

General procedure B was followed with benzyl ether **19b** (27.5 mg, 55.0  $\mu$ mol) in EtOH (4 mL) to which was added Pd(OH)<sub>2</sub> on carbon (7.70 mg, 20% wt on carbon, 11.0  $\mu$ mol). Standard work-up and purification by flash column chromatography (50 $\rightarrow$ 70% EtOAc/Hexane) provided alcohol **24** (21.3 mg, 95%), as a colourless oil.

**R<sub>f</sub>** 0.59 (50% EtOAc/Hexane); [ $\alpha$ ]<sub>D</sub><sup>20</sup> -28.1 (*c* 1.05, CHCl<sub>3</sub>); **IR** (thin film) 3421, 2934, 2860, 1456, 1441, 1381 cm<sup>-1</sup>; **<sup>1</sup>H NMR** (500 MHz, CDCl<sub>3</sub>)  $\delta$  7.66 (1H, s, H<sub>Ar</sub>), 5.09-5.05 (1H, m, H<sub>1'</sub>), 4.47 (1H, dd, *J* = 13.9, 2.6 Hz, H<sub>1a</sub>), 4.25 (1H, dd, *J* = 14.0, 8.0 Hz, H<sub>1b</sub>), 3.68-3.57 (4H, m, H<sub>2</sub> + H<sub>5'</sub> + H<sub>9'</sub>), 3.24-3.19 (1H, m, H<sub>6</sub>), 2.18-2.15 (1H, m, H<sub>2a'</sub>), 2.01-1.93 (1H, m, H<sub>2b'</sub>), 1.87-1.34 (14H, m, H<sub>3a</sub> + H<sub>3'-4'</sub> + H<sub>4</sub> + H<sub>5a</sub> + H<sub>6'</sub> + H<sub>7</sub> + H<sub>8'</sub>), 1.30-1.09 (12H, m, H<sub>3b</sub> + H<sub>5b</sub> + H<sub>7'</sub> + H<sub>8-11</sub>), 0.87 (3H, t, *J* = 6.6 Hz, H<sub>12</sub>); **<sup>13</sup>C NMR** (125 MHz, CDCl<sub>3</sub>)  $\delta$  148.4, 123.3, 77.8, 76.1, 71.3, 67.7, 62.7, 55.0, 36.3, 34.4, 32.7, 31.8, 31.2, 30.7, 29.2, 28.5, 28.3, 25.5, 23.0, 22.6, 21.8, 19.1, 14.1; **HRMS** (ES<sup>+</sup>) Calc. for C<sub>23</sub>H<sub>42</sub>O<sub>3</sub>N<sub>3</sub> [M+H]<sup>+</sup> 408.3221, found 408.3221.

**1-[(2*R*',6*S*')-6'-(hexyltetrahydropyran-2-yl)methyl]-4-[(2*R*'',6*S*'')-6''-(4-hydroxybutyl) tetrahydropyran-2-yl]-1*H*-1,2,3-triazole (25)**

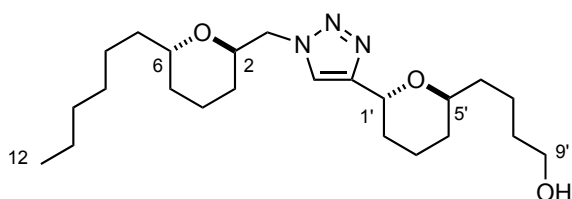

General procedure B was followed with benzyl ether **20b** (10.0 mg, 20.0  $\mu$ mol) in EtOH (2 mL) to which was added Pd(OH)<sub>2</sub> on carbon (2.80 mg, 20% wt on carbon, 4.02  $\mu$ mol).

Standard work-up and purification by flash column chromatography (50→70% EtOAc/Hexane) provided alcohol **25** (7.60 mg, 93%), as a colourless oil.

**R<sub>f</sub>** 0.03 (50% EtOAc/Hexane);  $[\alpha]_{\text{D}}^{20}$  -48.3 (*c* 0.84, CHCl<sub>3</sub>); **IR** (thin film) 3422, 2934, 2860, 1749, 1456 cm<sup>-1</sup>; **<sup>1</sup>H NMR** (500 MHz, CDCl<sub>3</sub>) δ 7.61 (1H, s, H<sub>Ar</sub>), 5.08 (1H, t, *J* = 4.4 Hz, H<sub>1'</sub>), 4.42 (1H, dd, *J* = 14.0, 3.5 Hz, H<sub>1a</sub>), 4.32 (1H, dd, *J* = 14.1, 8.6 Hz, H<sub>1b</sub>), 4.00 (1H, app tt, *J* = 8.7, 3.1 Hz, H<sub>2</sub>), 3.83-3.79 (1H, m, H<sub>5'</sub>), 3.67-3.58 (1H, m, H<sub>9'</sub>), 3.58-3.54 (1H, m, H<sub>6</sub>), 2.19 (1H, app dq, *J* = 13.1, 4.3 Hz, H<sub>2a'</sub>), 1.99-1.92 (1H, m, H<sub>2b'</sub>), 1.75-1.62 (8H, m, H<sub>3a</sub> + H<sub>3'</sub> + H<sub>5a</sub> + H<sub>6'</sub> + H<sub>7</sub>), 1.59-1.28 (9H, m, H<sub>3b</sub> + H<sub>4a'</sub> + H<sub>4</sub> + H<sub>5b</sub> + H<sub>7'-8'</sub>), 1.27-1.12 (8H, m, H<sub>4b'</sub> + H<sub>8a</sub> + H<sub>9-11</sub>), 1.10-1.03 (1H, m, H<sub>8b</sub>), 0.84 (3H, t, *J* = 7.1 Hz, H<sub>12</sub>); **<sup>13</sup>C NMR** (125 MHz, CDCl<sub>3</sub>) δ 148.4, 123.2, 72.5, 71.0, 69.1, 68.0, 62.8, 53.7, 34.5, 32.6, 31.7, 31.4, 30.9, 29.2, 28.9, 28.3, 28.0, 25.6, 22.6, 21.6, 19.2, 18.1, 14.0; **HRMS** (ES<sup>+</sup>) Calc. for C<sub>23</sub>H<sub>42</sub>O<sub>3</sub>N<sub>3</sub> [M+H]<sup>+</sup> 408.3221, found 408.3218.

**1-[(2*R'*,6*S'*)-6'-(hexyltetrahydropyran-2-yl)methyl]-4-[(2*S''*,6*S''*)-6''-(4-hydroxybutyl) tetrahydropyran-2-yl]-1*H*-1,2,3-triazole (**26**)**

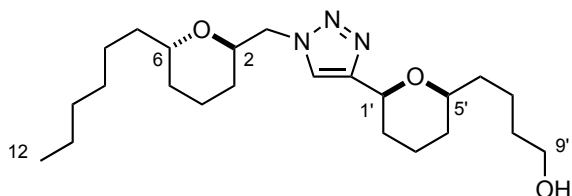

General procedure B was followed with benzyl ether **21b** (17.2 mg, 35.0 μmol) in EtOH (4 mL) to which was added Pd(OH)<sub>2</sub> on carbon (4.80 mg, 20% wt on carbon, 6.91 μmol). Standard work-up and purification by flash column chromatography (50→70% EtOAc/Hexane) provided alcohol **26** (13.0 mg, 92%), as a colourless oil.

**R<sub>f</sub>** 0.16 (60% EtOAc/Hexane);  $[\alpha]_{\text{D}}^{20}$  -41.7 (*c* 1.04, CHCl<sub>3</sub>); **IR** (thin film) 3424, 2932, 2859, 1742, 1458 cm<sup>-1</sup>; **<sup>1</sup>H NMR** (400 MHz, CDCl<sub>3</sub>) δ 7.61 (1H, s, H<sub>Ar</sub>), 4.59-4.56 (1H, m, H<sub>1'</sub>), 4.38-4.37 (2H, m, H<sub>1</sub>), 4.03-3.97 (1H, m, H<sub>2</sub>), 3.82-3.78 (1H, m, H<sub>5'</sub>), 3.64 (2H, m, H<sub>9'</sub>), 3.50-3.45 (1H, m, H<sub>6</sub>), 2.07-2.04 (1H, m, H<sub>2a'</sub>), 1.94-1.92 (1H, m, H<sub>3a'</sub>), 1.74-1.45 (11H, m, H<sub>2b'</sub> + H<sub>3a</sub> + H<sub>3b'</sub> + H<sub>4a'</sub> + H<sub>4</sub> + H<sub>5a</sub> + H<sub>7</sub> + H<sub>8'</sub>), 1.40-1.08 (15H, m, H<sub>3b</sub> + H<sub>4b'</sub> + H<sub>5b</sub> + H<sub>6'-7'</sub> + H<sub>8-11</sub>), 0.86 (3H, t, *J* = 6.8 Hz, H<sub>12</sub>); **<sup>13</sup>C NMR** (125 MHz, CDCl<sub>3</sub>) δ 149.6, 121.9, 78.3, 73.0, 72.2, 69.1, 62.8, 53.5, 36.0, 32.7, 31.9, 31.8, 31.5, 31.2, 29.1, 29.0, 27.8, 25.6, 23.5, 22.6, 21.7, 18.2, 14.1; **HRMS** (ES<sup>+</sup>) Calc. for C<sub>23</sub>H<sub>42</sub>O<sub>3</sub>N<sub>3</sub> [M+H]<sup>+</sup> 408.3221, found 408.3217.

**1-[(2*R*',6*R*')-6'-(hexyltetrahydropyran-2-yl)methyl]-4-[(2*S*'',6*S*'')-6''-(4-hydroxybutyl) tetrahydropyran-2-yl]-1*H*-1,2,3-triazole (27)**

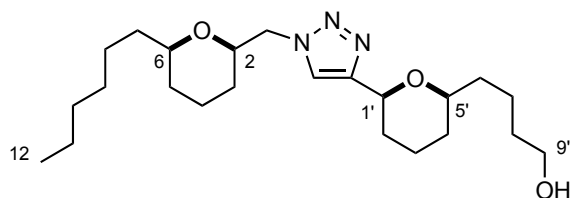

General procedure B was followed with benzyl ether **22** (23.1 mg, 46.0  $\mu\text{mol}$ ) in EtOH (4 mL) to which was added Pd(OH)<sub>2</sub> on carbon (6.50 mg, 20% wt on carbon, 9.00  $\mu\text{mol}$ ). Standard work-up and purification by flash column chromatography (50 $\rightarrow$ 70% EtOAc/Hexane) provided alcohol **27** (17.1 mg, 90%), as a colourless oil.

**R<sub>f</sub>** 0.06 (60% EtOAc/Hexane);  $[\alpha]_{\text{D}}^{20}$  -20.3 (*c* 1.71, CHCl<sub>3</sub>); **IR** (thin film) 2297, 2932, 2859, 1792, 1734, 1628, 1559 cm<sup>-1</sup>; **<sup>1</sup>H NMR** (500 MHz, CDCl<sub>3</sub>)  $\delta$  7.67 (1H, s, H<sub>A</sub>r), 4.64-4.60 (1H, m, H<sub>1'</sub>), 4.47 (1H, dd, *J* = 14.1, 3.1 Hz, H<sub>1a</sub>'), 4.22 (1H, dd, *J* = 14.0, 8.1 Hz, H<sub>1b</sub>'), 3.67-3.63 (3H, m, H<sub>2</sub> + H<sub>9'</sub>), 3.52-3.47 (1H, m, H<sub>5'</sub>), 3.26-3.20 (1H, m, H<sub>6</sub>), 2.09-2.05 (1H, m, H<sub>2a</sub>'), 2.01-1.84 (2H, m, H<sub>3a</sub>' + H<sub>4a</sub>'), 1.72-1.41 (10H, m, H<sub>2b</sub>' + H<sub>3a</sub>' + H<sub>3b</sub>' + H<sub>4a</sub>' + H<sub>4b</sub>' + H<sub>5a</sub>' + H<sub>6'</sub> + H<sub>8'</sub>), 1.40-1.11 (15H, m, H<sub>3b</sub>' + H<sub>4b</sub>' + H<sub>5b</sub>' + H<sub>7'</sub> + H<sub>7-11</sub>'), 0.88 (3H, t, *J* = 6.7 Hz, H<sub>12</sub>'); **<sup>13</sup>C NMR** (125 MHz, CDCl<sub>3</sub>)  $\delta$  149.6, 122.2, 78.3, 77.8, 76.0, 73.0, 62.8, 55.0, 36.3, 36.1, 32.7, 31.9, 31.4, 31.2, 31.1, 29.3, 28.6, 25.5, 23.5, 23.0, 22.6, 21.7, 14.1; **HRMS** (ES<sup>+</sup>) Calc. for C<sub>23</sub>H<sub>42</sub>O<sub>3</sub>N<sub>3</sub> [M+H]<sup>+</sup> 408.3221, found 408.3220.

**4-[(2*S*',6*S*')-6'-(hexyltetrahydropyran-2-yl)]-1-[(2*S*'',6*S*'')-6''-(4-hydroxybutyl) tetrahydropyran-2-yl)methyl]-1*H*-1,2,3-triazole (28)**

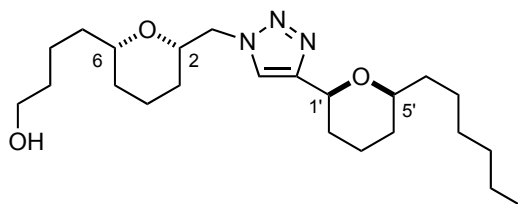

General procedure B was followed with benzyl ether **18c** (26.2 mg, 53.0  $\mu\text{mol}$ ) in EtOH (4 mL) to which was added Pd(OH)<sub>2</sub> on carbon (7.40 mg, 20% wt on carbon, 11.0  $\mu\text{mol}$ ). Standard work-up and purification by flash column chromatography (60% EtOAc/Hexane) provided alcohol **28** (21.5 mg, 100%), as a colourless oil.

**R<sub>f</sub>** 0.2 (60% EtOAc/Hexane);  $[\alpha]_D^{20}$  -20.3 (*c* 0.39, CHCl<sub>3</sub>); **IR** (thin film) 3395, 2932, 2859, 1456, 1439 cm<sup>-1</sup>; **<sup>1</sup>H NMR** (500 MHz, CDCl<sub>3</sub>) δ 7.63 (1H s, H<sub>Ar</sub>), 4.60-4.58 (1H, m, H<sub>1'</sub>), 4.44 (1H, dd, *J* = 14.0, 2.8 Hz, H<sub>1a</sub>), 4.19 (1H, dd, *J* = 14.0, 8.4 Hz, H<sub>1b</sub>), 3.67-3.63 (1H, m, H<sub>2</sub>), 3.61-3.56 (2H, m, H<sub>10</sub>), 3.48-3.44 (1H, m, H<sub>5'</sub>), 3.24-3.20 (1H, m, H<sub>6</sub>), 2.05-2.03 (1H, m, H<sub>2a'</sub>), 1.94-1.84 (2H, m, H<sub>3a'</sub> + H<sub>4a</sub>), 1.66-1.40 (14H, m, H<sub>2b'</sub> + H<sub>3a</sub> + H<sub>3b'</sub> + H<sub>4a'</sub> + H<sub>4b</sub> + H<sub>5a</sub> + H<sub>6'</sub> + H<sub>7</sub> + H<sub>9</sub> + H<sub>9'</sub>), 1.35-1.17 (11H, m, H<sub>3b</sub> + H<sub>4b'</sub> + H<sub>5b</sub> + H<sub>7'-8'</sub> + H<sub>8</sub> + H<sub>10'</sub>), 0.86 (3H, t, *J* = 6.1 Hz, H<sub>11'</sub>); **<sup>13</sup>C NMR** (125 MHz, CDCl<sub>3</sub>) δ 149.8, 122.2, 78.6, 77.6, 76.1, 73.3, 62.6, 55.0, 36.5, 35.7, 32.5, 31.8, 31.7, 31.2, 31.2, 29.4, 28.6, 25.5, 23.6, 23.0, 22.6, 21.7, 14.1; **HRMS** (CI<sup>+</sup>) Calc. for C<sub>23</sub>H<sub>42</sub>O<sub>3</sub>N<sub>3</sub> [M+H]<sup>+</sup> 408.3221, found 408.3218.

**1-[(2*S'*,6*S'*)-6'-(hexyltetrahydropyran-2-yl)methyl]-4-[(2*S''*,6*S''*)-6''-(4-(sulfonyl-1-phenyl-1*H*-1,2,3,4-tetrazolyl)butyl)tetrahydropyran-2-yl]-1*H*-1,2,3-triazole (29)**

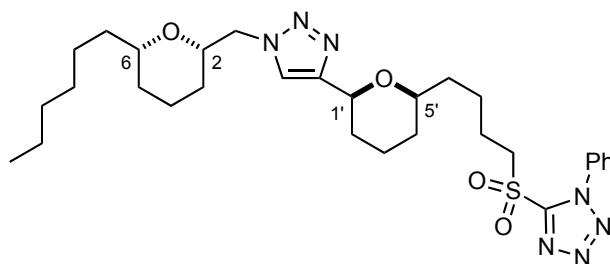

To a solution of alcohol **23** (38.2 mg, 94.0 μmol) in THF (2 mL) at 0 °C was added 1-phenyl-1*H*-tetrazole-5-thiol (21.7 mg, 120 μmol) and PPh<sub>3</sub> (32.0 mg, 120 μmol) followed by DIAD (24.0 μL, 120 μmol) dropwise. The reaction mixture was warmed to RT over 3 h, then quenched by the addition of saturated aqueous NH<sub>4</sub>Cl (5 mL) and EtOAc (5 mL). The organics were extracted with EtOAc (3 × 5 mL), dried (Na<sub>2</sub>SO<sub>4</sub>), filtered and concentrated *in vacuo*. Purification by flash column chromatography (20→50% EtOAc/Hexane) provided 1-[(2*S'*,6*S'*)-6'-(hexyltetrahydropyran-2-yl)methyl]-4-[(2*S''*,6*S''*)-6''-(4-(sulfonyl-1-phenyl-1*H*-1,2,3,4-tetrazolyl)butyl)tetrahydropyran-2-yl]-1*H*-1,2,3-triazole (35.8 mg, 67%), as a colourless oil.

**R<sub>f</sub>** 0.46 (30% Acetone/Hexane);  $[\alpha]_D^{20}$  -26.1 (*c* 1.01, CHCl<sub>3</sub>); **IR** (thin film) 2932, 2857, 1728, 1499, 1385, 1086 cm<sup>-1</sup>; **<sup>1</sup>H NMR** (300 MHz, CDCl<sub>3</sub>) δ 7.68 (1H, s, H<sub>Ar</sub>), 7.61-7.51 (5H, m, ArH), 4.66-4.62 (1H, m, H<sub>1'</sub>), 4.48 (1H, dd, *J* = 13.9, 3.0 Hz, H<sub>1a</sub>), 4.20 (1H, dd, *J* = 14.0, 8.4 Hz, H<sub>1b</sub>), 3.68-3.60 (1H, m, H<sub>2</sub>), 3.51-3.44 (1H, m, H<sub>5'</sub>), 3.38 (2H, t, *J* = 7.3 Hz, H<sub>9</sub>), 3.23-3.16 (1H, m, H<sub>6</sub>), 2.10-2.07 (1H, m, H<sub>2a'</sub>), 1.97-1.79 (4H, m, H<sub>4</sub> + H<sub>8'</sub>), 1.68-1.42 (10H, m, H<sub>2b'</sub> + H<sub>3a</sub> + H<sub>3'</sub> + H<sub>4a'</sub> + H<sub>5a</sub> + H<sub>6'</sub> + H<sub>7</sub>), 1.37-1.14 (13H, m, H<sub>3b</sub> + H<sub>4b'</sub> +

$\underline{H}_{5b} + \underline{H}_{7'} + \underline{H}_{8-11}$ ), 0.86 (3H, t,  $J = 6.4$  Hz,  $\underline{H}_{12}$ );  $^{13}\text{C NMR}$  (75 MHz,  $\text{CDCl}_3$ )  $\delta$  154.4, 149.5, 133.7, 130.0, 129.7, 123.8, 122.3, 77.9, 77.8, 76.0, 73.1, 55.0, 36.3, 35.7, 33.2, 31.8, 31.6, 31.2, 31.1, 29.3, 29.1, 28.6, 25.5, 24.6, 23.5, 22.9, 22.6, 14.1; **HRMS** ( $\text{ES}^+$ ) Calc. for  $\text{C}_{30}\text{H}_{45}\text{O}_2\text{N}_7\text{S}_1\text{Na}$   $[\text{M}+\text{Na}]^+$  590.3261, found 590.3245.

To a solution of 1-[(2*S'*,6*S'*)-6'-(hexyltetrahydropyran-2-yl)methyl]-4-[(2*S''*,6*S''*)-6''-(4-(sulfanyl-1-phenyl-*IH*-1,2,3,4-tetrazolyl)butyl)tetrahydropyran-2-yl]-*IH*-1,2,3-triazole (35.8 mg, 63.0  $\mu\text{mol}$ ) in MeOH (1 mL) at 0 °C was added a mixture of ammonium molybdate (39.0 mg, 32.0  $\mu\text{mol}$ ) and  $\text{H}_2\text{O}_2$  (143  $\mu\text{L}$ , 30% v/v solution in  $\text{H}_2\text{O}$ , 1.26 mmol). After 16 h at RT, the reaction mixture was diluted with MeOH (3 mL) and  $\text{H}_2\text{O}$  (3 mL). The organics were extracted with  $\text{CH}_2\text{Cl}_2$  (3  $\times$  5 mL), dried ( $\text{Na}_2\text{SO}_4$ ), filtered and concentrated *in vacuo*. Purification by flash column chromatography (20% Acetone/Hexane) provided sulfone **29** (34.3 mg, 91%), as a colourless oil.

$R_f$  0.43 (30% Acetone/Hexane);  $[\alpha]_D^{20}$  -20.1 ( $c$  1.00,  $\text{CHCl}_3$ ); **IR** (thin film) 2932, 2857, 1732, 1595, 1499, 1340  $\text{cm}^{-1}$ ;  $^1\text{H NMR}$  (400 MHz,  $\text{CDCl}_3$ )  $\delta$  7.72-7.55 (6H, m,  $\text{ArH} + \underline{H}_{\text{Ar}}$ ), 4.60-4.57 (1H, m,  $\underline{H}_{1'}$ ), 4.44 (1H, dd,  $J = 14.0, 3.2$  Hz,  $\underline{H}_{1a}$ ), 4.18 (1H, dd,  $J = 14.0, 8.3$  Hz,  $\underline{H}_{1b}$ ), 3.72-3.68 (2H, m,  $\underline{H}_{9'}$ ), 3.65-3.59 (1H, m,  $\underline{H}_2$ ), 3.51-3.45 (1H, m,  $\underline{H}_{5'}$ ), 3.21-3.16 (1H, m,  $\underline{H}_6$ ), 2.01-1.91 (3H, m,  $\underline{H}_{2a'} + \underline{H}_{8'}$ ), 1.86-1.82 (1H, m,  $\underline{H}_{4a}$ ), 1.70-1.42 (11H, m,  $\underline{H}_{2b'} + \underline{H}_{3a} + \underline{H}_{3'} + \underline{H}_{4a'} + \underline{H}_{4b} + \underline{H}_{5a} + \underline{H}_{6'} + \underline{H}_{10}$ ), 1.39-1.10 (13H, m,  $\underline{H}_{3b} + \underline{H}_{4b'} + \underline{H}_{5b} + \underline{H}_{7'} + \underline{H}_{7-9} + \underline{H}_{11}$ ), 0.86 (3H, t,  $J = 6.7$  Hz,  $\underline{H}_{12}$ );  $^{13}\text{C NMR}$  (75 MHz,  $\text{CDCl}_3$ )  $\delta$  153.4, 149.4, 133.0, 131.4, 129.6, 125.0, 122.3, 77.8, 77.7, 76.1, 73.1, 55.9, 55.0, 36.3, 35.5, 31.8, 31.6, 31.2, 31.2, 29.3, 28.6, 25.5, 24.2, 23.5, 23.0, 22.6, 22.0, 14.1; **HRMS** ( $\text{ES}^+$ ) Calc. for  $\text{C}_{30}\text{H}_{46}\text{O}_4\text{N}_7\text{S}_1$   $[\text{M}+\text{H}]^+$  600.3340, found 600.3320.

**1-[(2*S'*,6*S'*)-6'-(hexyltetrahydropyran-2-yl)methyl]-4-[(2*S''*,6*S''*)-6''-[10-[(5*S*)-3-(5-methyl-2,5-dihydrofuran-2-one)decyl)-tetrahydropyran-2-yl]-*IH*-1,2,3-triazole (**31**)**

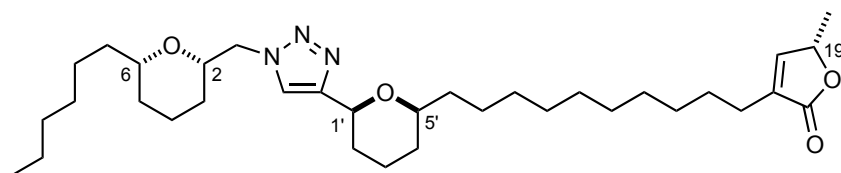

To a solution of sulfone **29** (31.5 mg, 53.0  $\mu\text{mol}$ ) in THF (3 mL) at -78 °C was added NaHMDS (410  $\mu\text{L}$ , 0.2 M solution in THF, 82.0  $\mu\text{mol}$ ). After 10 min, a solution of aldehyde **30** (37.0 mg, 190  $\mu\text{mol}$ ) in THF (1 mL) was added dropwise *via* cannula. After 1.25 h, saturated aqueous  $\text{NH}_4\text{Cl}$  (4 mL) was added, and the reaction mixture was warmed

to RT. The organics were extracted with EtOAc (3 x 5 mL) and the combined organic extracts were washed with brine (10 mL), dried (Na<sub>2</sub>SO<sub>4</sub>), filtered and concentrated *in vacuo*. Purification by flash column chromatography (3% EtOAc/CH<sub>2</sub>Cl<sub>2</sub>) provided 1-[(2*S*',6*S*')-6'-(hexyltetrahydropyran-2-yl)methyl]-4-[(2*S*'',6*S*'')-6''-[(4*E*)-10-[(5*S*)-3-(5-methyl-2,5-dihydrofuran-2-one)dec-4-ene)-tetrahydropyran-2-yl]-1*H*-1,2,3-triazole (18.4 mg, 61%) as a colourless oil.

**R<sub>f</sub>** 0.61 (30% Acetone/Hexane); [ $\alpha$ ]<sub>D</sub><sup>20</sup> -9.40 (*c* 1.84, CHCl<sub>3</sub>); **IR** (thin film) 2934, 2856, 1751, 1456, 1084 cm<sup>-1</sup>; **<sup>1</sup>H NMR** (400 MHz, CDCl<sub>3</sub>)  $\delta$  7.64 (1H, s, H<sub>Ar</sub>), 6.97 (1H, app q, *J* = 1.5 Hz, H<sub>18'</sub>), 5.37-5.31 (2H, m, H<sub>9'-10'</sub>), 4.98 (1H, qq, *J* = 6.7, 1.7 Hz, H<sub>19'</sub>), 4.60 (1H, dd, *J* = 11.1, 1.9 Hz, H<sub>1'</sub>), 4.46 (1H, dd, *J* = 14.0, 3.0 Hz, H<sub>1a</sub>), 4.18 (1H, dd, *J* = 14.1, 8.3 Hz, H<sub>1b</sub>), 3.62 (1H, app ddt, *J* = 11.3, 8.5, 2.5 Hz, H<sub>2</sub>), 3.49-3.43 (1H, m, H<sub>5'</sub>), 3.23-3.16 (1H, m, H<sub>6</sub>), 2.27-2.22 (2H, m, H<sub>15'</sub>), 2.02-1.83 (7H, m, H<sub>2a'</sub> + H<sub>3a'</sub> + H<sub>4a</sub> + H<sub>8'</sub> + H<sub>11'</sub>), 1.64-1.43 (10H, m, H<sub>2b'</sub> + H<sub>3a</sub> + H<sub>3b'</sub> + H<sub>4a'</sub> + H<sub>4b</sub> + H<sub>5a</sub> + H<sub>10</sub> + H<sub>14'</sub>), 1.41-1.30 (8H, m, H<sub>6'-7'</sub> + H<sub>7</sub> + H<sub>12'</sub>), 1.39 (3H, d, *J* = 6.8 Hz, H<sub>20'</sub>), 1.29-1.11 (11H, m, H<sub>3b</sub> + H<sub>4b'</sub> + H<sub>5b</sub> + H<sub>8-9</sub> + H<sub>11</sub> + H<sub>13'</sub>), 0.87 (3H, t, *J* = 6.7 Hz, H<sub>12</sub>); **<sup>13</sup>C NMR** (125 MHz, CDCl<sub>3</sub>)  $\delta$  173.9, 149.7, 148.9, 134.2, 130.3, 130.2, 122.4, 78.3, 77.8, 77.3, 76.1, 73.0, 55.1, 36.3, 36.0, 32.6, 32.3, 31.8, 31.7, 31.2, 31.1, 29.3, 29.2, 28.6, 28.6, 27.2, 25.6, 25.5, 25.1, 23.5, 23.0, 22.6, 19.2, 14.1; **HRMS** (ES<sup>+</sup>) Calc. for C<sub>34</sub>H<sub>55</sub>O<sub>4</sub>N<sub>3</sub>Na [M+Na]<sup>+</sup> 592.4099, found 592.4079.

To a solution of 1-[(2*S*',6*S*')-6'-(hexyltetrahydropyran-2-yl)methyl]-4-[(2*S*'',6*S*'')-6''-[(4*E*)-10-[(5*S*)-3-(5-methyl-2,5-dihydrofuran-2-one)dec-4-ene)-tetrahydropyran-2-yl]-1*H*-1,2,3-triazole (17.1 mg, 30.0  $\mu$ mol) and TsNHNH<sub>2</sub> (340 mg, 1.80 mmol) in DME (3 mL) at reflux was added a solution of NaOAc (240 mg, 1.80 mmol) in H<sub>2</sub>O (3 mL) over 3 h. The reaction mixture was cooled and diluted with H<sub>2</sub>O (3 mL) and EtOAc (5 mL) and the organics were extracted with EtOAc (3 x 10 mL). The combined organic extracts were washed with 3 N HCl (3 x 5 mL), NaHCO<sub>3</sub> (10 mL), brine (10 mL), dried (Na<sub>2</sub>SO<sub>4</sub>), filtered and concentrated *in vacuo*. Purification by flash column chromatography (8% EtOAc/CH<sub>2</sub>Cl<sub>2</sub>) provided alkane **31** (14.7 mg, 86%) as a colourless oil.

**R<sub>f</sub>** 0.22 (3% EtOAc/CH<sub>2</sub>Cl<sub>2</sub>); [ $\alpha$ ]<sub>D</sub><sup>20</sup> -8.1 (*c* 1.47, CHCl<sub>3</sub>); **IR** (thin film) 2928, 2855, 1755, 1456, 1317, 1198 cm<sup>-1</sup>; **<sup>1</sup>H NMR** (400 MHz, CDCl<sub>3</sub>)  $\delta$  7.64 (1H, s, H<sub>Ar</sub>), 6.98 (1H, app q, *J* = 1.5 Hz, H<sub>18'</sub>), 4.98 (1H, qq, *J* = 6.8, 1.8 Hz, H<sub>19'</sub>), 4.61-4.58 (1H, m, H<sub>1'</sub>), 4.46 (1H, dd, *J* = 14.1, 3.0 Hz, H<sub>1a</sub>), 4.18 (1H, dd, *J* = 14.1, 8.2 Hz, H<sub>1b</sub>), 3.65-3.60 (1H, m, H<sub>2</sub>), 3.48-3.43 (1H, m, H<sub>5'</sub>), 3.22-3.17 (1H, m, H<sub>6</sub>), 2.27-2.23 (2H, m, H<sub>15'</sub>), 2.02-1.83 (3H, m, H<sub>2a'</sub> + H<sub>3a'</sub> + H<sub>4a</sub>), 1.66-1.45 (9H, m, H<sub>2b'</sub> + H<sub>3a</sub> + H<sub>3b'</sub> + H<sub>4a'</sub> + H<sub>4b</sub> + H<sub>10</sub> + H<sub>14'</sub>), 1.43-1.32 (5H, m,



$\underline{H}_{5a} + \underline{H}_{6'} + \underline{H}_7$ ), 1.39 (3H, d,  $J = 6.8$  Hz,  $\underline{H}_{20'}$ ), 1.32-1.11 (23H, m,  $\underline{H}_{3b} + \underline{H}_{4b'} + \underline{H}_{5b} + \underline{H}_{7-13'} + \underline{H}_{8-9} + \underline{H}_{11}$ ), 0.87 (3H, t,  $J = 6.5$  Hz,  $\underline{H}_{12}$ );  $^{13}\text{C}$  NMR (125 MHz,  $\text{CDCl}_3$ )  $\delta$  173.9, 149.9, 148.9, 134.3, 122.3, 78.4, 77.8, 77.4, 76.1, 73.1, 55.0, 36.5, 36.4, 31.9, 31.8, 31.2, 31.2, 29.7, 29.6 (2C), 29.5, 29.3, 29.3, 29.2, 28.6, 27.4, 25.6, 25.5, 25.1, 23.6, 23.0, 22.6, 19.2, 14.1; HRMS ( $\text{ES}^+$ ) Calc. for  $\text{C}_{34}\text{H}_{58}\text{O}_4\text{N}_3$   $[\text{M}+\text{H}]^+$  572.4435, found 572.4405.

**4-[(2*S'*,6*S'*)-6'--(hexyltetrahydropyran-2-yl)]-1-[(2*S''*,6*S''*)-6''-[10-[(5*S*)-3-(5-methyl-2,5-dihydrofuran-2-one)decyl-(tetrahydropyran-2-yl)methyl]-1*H*-1,2,3-triazole (32)**

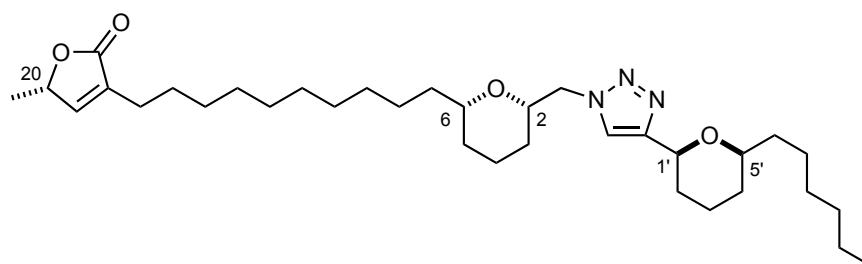

To a solution of sulfone **33** (21.9 mg, 37.0  $\mu\text{mol}$ ) in THF (2 mL) at  $-78$   $^\circ\text{C}$  was added NaHMDS (220  $\mu\text{L}$ , 0.20 M solution in THF, 44.0  $\mu\text{mol}$ ). After 10 min, a solution of aldehyde **30** (11.0 mg, 55.0  $\mu\text{mol}$ ) in THF (1 mL) was added dropwise *via* cannula. After 1.5 h, saturated aqueous  $\text{NH}_4\text{Cl}$  (5 mL) was added, and the reaction mixture was warmed to RT. The organics were extracted with EtOAc (3 x 5 mL) and the combined organic extracts were washed with brine (10 mL), dried ( $\text{Na}_2\text{SO}_4$ ), filtered and concentrated *in vacuo*. Purification by flash column chromatography (3% EtOAc/ $\text{CH}_2\text{Cl}_2$ ) provided 4-[(2*S'*,6*S'*)-6'--(hexyltetrahydropyran-2-yl)]-1-[(2*S''*,6*S''*)-6''-[10-[(5*S*)-3-(5-methyl-2,5-dihydrofuran-2-one)dec-4-ene-(tetrahydropyran-2-yl)methyl]-1*H*-1,2,3-triazole (9.20 mg, 44%) as a colourless oil.

$R_f$  0.43 (30% EtOAc/Hexane);  $[\alpha]_D^{20}$   $-5.7$  ( $c$  0.92,  $\text{CHCl}_3$ ); IR (thin film) 2932, 2859, 2097,  $1755\text{ cm}^{-1}$ ;  $^1\text{H}$  NMR (300 MHz,  $\text{CDCl}_3$ )  $\delta$  7.63 (1H, s,  $\underline{H}_{Ar}$ ), 7.00-6.97 (1H, m,  $\underline{H}_{19}$ ), 5.43-5.29 (2H, m,  $\underline{H}_{10-11}$ ), 5.03-4.95 (1H, m,  $\underline{H}_{20}$ ), 4.61-4.58 (1H, m,  $\underline{H}_{1'}$ ), 4.45 (1H, dd,  $J = 14.1, 3.1$  Hz,  $\underline{H}_{1a}$ ), 4.20 (1H, dd,  $J = 14.0, 8.0$  Hz,  $\underline{H}_{1b}$ ), 3.69-3.60 (1H, m,  $\underline{H}_2$ ), 3.50-3.42 (1H, m,  $\underline{H}_5$ ), 3.26-3.17 (1H, m,  $\underline{H}_6$ ), 2.29-2.23 (2H, m,  $\underline{H}_{16}$ ), 2.04-1.83 (7H, m,  $\underline{H}_{2a'} + \underline{H}_{3a'} + \underline{H}_{4a} + \underline{H}_9 + \underline{H}_{12}$ ), 1.71-1.48 (7H, m,  $\underline{H}_{2b'} + \underline{H}_{3a} + \underline{H}_{3b'} + \underline{H}_{4a'} + \underline{H}_{4b} + \underline{H}_{15}$ ), 1.46-1.32 (9H, m,  $\underline{H}_{5a} + \underline{H}_{6'} + \underline{H}_{7-8} + \underline{H}_{13}$ ), 1.40 (3H, d,  $J = 6.8$  Hz,  $\underline{H}_{21}$ ), 1.30-1.11 (13H, m,  $\underline{H}_{3b} + \underline{H}_{4b'} + \underline{H}_{5b} + \underline{H}_{7-10'} + \underline{H}_{14}$ ), 0.86 (3H, t,  $J = 6.9$  Hz,  $\underline{H}_{11'}$ );  $^{13}\text{C}$  NMR (125 MHz,  $\text{CDCl}_3$ )  $\delta$  173.8, 149.9, 148.9, 134.2, 130.3, 130.2, 122.3, 78.4, 77.7, 77.4, 76.1, 73.1, 55.0, 36.5, 35.8, 32.5,

32.4, 31.8, 31.7, 31.2 (2C), 29.4, 29.2, 28.7, 28.6, 27.3, 25.5 (2C), 25.1, 23.6, 23.0, 22.6, 19.2, 14.1; **HRMS** (ES<sup>+</sup>) Calc. for C<sub>34</sub>H<sub>56</sub>O<sub>4</sub>N<sub>3</sub> [M+H]<sup>+</sup> 570.4279, found 570.4262.

To a solution of 4-[(2*S'*,6*S'*)-6'--(hexyltetrahydropyran-2-yl)]-1-[(2*S''*,6*S''*)-6''-[(4*E*)-10-[(5*S*)-3-(5-methyl-2,5-dihydrofuran-2-one)dec-4-ene-(tetrahydropyran-2-yl)methyl]-*IH*-1,2,3-triazole (9.20 mg, 16.0 μmol) and TsNHNH<sub>2</sub> (180 mg, 970 μmol) in DME (1 mL) at reflux was added a solution of NaOAc (131 mg, 970 μmol) in H<sub>2</sub>O (1 mL) over 3 h. The reaction mixture was cooled and diluted with H<sub>2</sub>O (3 mL) and EtOAc (5 mL) and the organics were extracted with EtOAc (3 x 5 mL). The combined organic extracts were washed with 3 N HCl (3 x 5 mL), NaHCO<sub>3</sub> (10 mL), brine (10 mL), dried (Na<sub>2</sub>SO<sub>4</sub>), filtered and concentrated *in vacuo*. Purification by flash column chromatography (8% EtOAc/CH<sub>2</sub>Cl<sub>2</sub>) provided alkane **32** (6.90 mg, 75%) as a colourless oil.

**R<sub>f</sub>** 0.43 (30% EtOAc/Hexane); [α]<sub>D</sub><sup>20</sup> -6.4 (*c* 0.67, CHCl<sub>3</sub>); **IR** (thin film) 2930, 2855, 1757, 1456, 1373, 1317 cm<sup>-1</sup>; **<sup>1</sup>H NMR** (400 MHz, CDCl<sub>3</sub>) δ 7.67 (1H, s, H<sub>A</sub>r), 6.99-6.98 (1H, m, H<sub>19</sub>), 5.03-4.96 (1H, m, H<sub>20</sub>), 4.68-4.61 (1H, m, H<sub>1</sub>'), 4.47 (1H, dd, *J* = 14.0, 3.2 Hz, H<sub>1a</sub>), 4.21 (1H, dd, *J* = 13.9, 8.1 Hz, H<sub>1b</sub>), 3.37-3.62 (1H, m, H<sub>2</sub>), 3.49-3.44 (1H, m, H<sub>5'</sub>), 3.26-3.18 (1H, m, H<sub>6</sub>), 2.28-2.24 (2H, m, H<sub>16</sub>), 2.09-2.04 (1H, m, H<sub>2a'</sub>), 1.95-1.84 (2H, m, H<sub>3a'</sub> + H<sub>4a</sub>), 1.67-1.46 (10H, m, H<sub>2b'</sub> + H<sub>3a</sub> + H<sub>3b'</sub> + H<sub>4a'</sub> + H<sub>4b</sub> + H<sub>5a</sub> + H<sub>9'</sub> + H<sub>15</sub>), 1.43-1.36 (4H, m, H<sub>6'</sub> + H<sub>7</sub>), 1.40 (3H, d, *J* = 6.8 Hz, H<sub>21</sub>), 1.32-1.12 (23H, m, H<sub>3b</sub> + H<sub>4b'</sub> + H<sub>5b</sub> + H<sub>7'-8'</sub> + H<sub>8-14</sub> + H<sub>10'</sub>), 0.87 (3H, t, *J* = 6.9 Hz, H<sub>11'</sub>); **<sup>13</sup>C NMR** (125 MHz, CDCl<sub>3</sub>) δ 173.9, 149.2, 148.9, 134.3, 122.9, 78.4, 77.9, 77.4, 75.9, 72.7, 55.4, 36.5, 36.3, 31.8 (2C), 31.2, 31.1, 29.7, 29.6 (2C), 29.5, 29.4, 29.3, 29.2, 28.5, 27.4, 25.6, 25.5, 25.2, 23.5, 22.9, 22.6, 19.2, 14.1; **HRMS** (ES<sup>+</sup>) Calc. for C<sub>34</sub>H<sub>58</sub>O<sub>4</sub>N<sub>3</sub> [M+H]<sup>+</sup> 572.4435, found 572.4413.

**4-[(2*S'*,6*S'*)-6'--(hexyltetrahydropyran-2-yl)]-1-[(2*S''*,6*S''*)-6''-(4-(sulfonyl-1-phenyl-*IH*-1,2,3,4-tetrazolyl)butyltetrahydropyran-2-yl)methyl]-*IH*-1,2,3-triazole (**33**)**

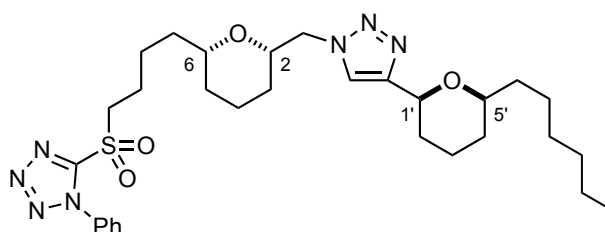

To a solution of alcohol **28** (21.9 mg, 54.0 μmol) in THF (2 mL) at 0 °C was added 1-phenyl-*IH*-tetrazole-5-thiol (12.0 mg, 70.0 μmol) and PPh<sub>3</sub> (18.0 mg, 70.0 μmol) followed by DIAD (14.0 μL, 70.0 μmol) dropwise. The reaction mixture was warmed to RT over 3

h, then quenched by the addition of saturated aqueous  $\text{NH}_4\text{Cl}$  (5 mL) and EtOAc (5 mL). The organics were extracted with EtOAc ( $3 \times 5$  mL), dried ( $\text{Na}_2\text{SO}_4$ ), filtered and concentrated *in vacuo*. Purification by flash column chromatography (15→30% EtOAc/Hexane) provided 4-[(2*S'*,6*S'*)-6'-*(hexyltetrahydropyran-2-yl)*]-1-[(2*S''*,6*S''*)-6''-(4-(sulfanyl-1-phenyl-*IH*-1,2,3,4-tetrazolyl)butyltetrahydropyran-2-yl)methyl]-*IH*-1,2,3-triazole (23.1 mg, 76%), as a colourless oil.

$R_f$  0.57 (30% Acetone/Hexane);  $[\alpha]_D^{20}$  -15.4 ( $c$  1.0,  $\text{CHCl}_3$ ); **IR** (thin film) 2932, 2857, 1499, 1456, 1387  $\text{cm}^{-1}$ ;  **$^1\text{H NMR}$**  (500 MHz,  $\text{CDCl}_3$ )  $\delta$  7.60 (1H, s,  $\underline{\text{H}}_{\text{Ar}}$ ), 7.58-7.52 (5H, m, Ar $\underline{\text{H}}$ ), 4.59 (1H, dd,  $J = 11.1, 1.9$  Hz,  $\underline{\text{H}}_{1'}$ ), 4.43 (1H, dd,  $J = 14.1, 3.3$  Hz,  $\underline{\text{H}}_{1a}$ ), 4.20 (1H, dd,  $J = 14.1, 8.0$  Hz,  $\underline{\text{H}}_{1b}$ ), 3.67-3.62 (1H, m,  $\underline{\text{H}}_2$ ), 3.46-3.42 (1H, m,  $\underline{\text{H}}_{5'}$ ), 3.41-3.31 (2H, m,  $\underline{\text{H}}_{10}$ ), 3.24-3.20 (1H, m,  $\underline{\text{H}}_6$ ), 2.04-2.02 (1H, m,  $\underline{\text{H}}_{2a'}$ ), 1.90-1.76 (4H, m,  $\underline{\text{H}}_4 + \underline{\text{H}}_9$ ), 1.64-1.36 (12H, m,  $\underline{\text{H}}_{2b'}$  +  $\underline{\text{H}}_{3a}$  +  $\underline{\text{H}}_{3'}$  +  $\underline{\text{H}}_{4a'}$  +  $\underline{\text{H}}_{5a}$  +  $\underline{\text{H}}_6$  +  $\underline{\text{H}}_{7-8}$ ), 1.31-1.12 (11H, m,  $\underline{\text{H}}_{3b}$  +  $\underline{\text{H}}_{4b'}$  +  $\underline{\text{H}}_{5b}$  +  $\underline{\text{H}}_{7-10'}$ ), 0.85 (3H, t,  $J = 6.6$  Hz,  $\underline{\text{H}}_{11'}$ );  **$^{13}\text{C NMR}$**  (125 MHz,  $\text{CDCl}_3$ )  $\delta$  154.3, 149.8, 133.6, 130.0, 129.7, 123.7, 122.2, 78.4, 77.3, 76.1, 73.1, 54.9, 36.5, 35.4, 33.1, 31.8, 31.7, 31.2, 31.1, 29.3, 28.9, 28.5, 25.5, 24.5, 23.5, 22.9, 22.6, 14.1; **HRMS** ( $\text{CI}^+$ ) Calc. for  $\text{C}_{30}\text{H}_{46}\text{O}_2\text{N}_7\text{S}$   $[\text{M}+\text{H}]^+$  568.3428, found 568.3425.

To a solution of 4-[(2*S'*,6*S'*)-6'-*(hexyltetrahydropyran-2-yl)*]-1-[(2*S''*,6*S''*)-6''-(4-(sulfanyl-1-phenyl-*IH*-1,2,3,4-tetrazolyl)butyltetrahydropyran-2-yl)methyl]-*IH*-1,2,3-triazole (22.0 mg, 39.0  $\mu\text{mol}$ ) in MeOH (1 mL) at 0 °C was added a mixture of ammonium molybdate (24.0 mg, 19.0  $\mu\text{mol}$ ) and  $\text{H}_2\text{O}_2$  (90.0  $\mu\text{L}$ , 30% v/v solution in  $\text{H}_2\text{O}$ , 770  $\mu\text{mol}$ ). After 16 h at RT, the reaction mixture was diluted with MeOH (3 mL) and  $\text{H}_2\text{O}$  (3 mL). The organics were extracted with  $\text{CH}_2\text{Cl}_2$  ( $3 \times 5$  mL), dried ( $\text{Na}_2\text{SO}_4$ ), filtered and concentrated *in vacuo*. Purification by flash column chromatography (15% Acetone/Hexane) provided sulfone **33** (21.9 mg, 94%), as a colourless oil.

$R_f$  0.5 (30% Acetone/Hexane);  $[\alpha]_D^{20}$  -15.0 ( $c$  0.98,  $\text{CHCl}_3$ ); **IR** (thin film) 2936, 2859, 1499, 1456, 1339  $\text{cm}^{-1}$ ;  **$^1\text{H NMR}$**  (500 MHz,  $\text{CDCl}_3$ )  $\delta$  7.72-7.68 (2H, m, Ar $\underline{\text{H}}$ ), 7.64-7.54 (4H, m, Ar $\underline{\text{H}}$  +  $\underline{\text{H}}_{\text{Ar}}$ ), 4.60-4.58 (1H, m,  $\underline{\text{H}}_{1'}$ ), 4.43 (1H, dd,  $J = 13.9, 3.2$  Hz,  $\underline{\text{H}}_{1a}$ ), 4.22 (1H, dd,  $J = 13.8, 8.0$  Hz,  $\underline{\text{H}}_{1b}$ ), 3.76-3.65 (3H, m,  $\underline{\text{H}}_2 + \underline{\text{H}}_{10}$ ), 3.48-3.43 (1H, m,  $\underline{\text{H}}_{5'}$ ), 3.25-3.21 (1H, m,  $\underline{\text{H}}_6$ ), 2.05-2.03 (1H, m,  $\underline{\text{H}}_{2a'}$ ), 1.94-1.84 (4H, m,  $\underline{\text{H}}_{3a'}$  +  $\underline{\text{H}}_{4a}$  +  $\underline{\text{H}}_9$ ), 1.65-1.39 (12H, m,  $\underline{\text{H}}_{2b'}$  +  $\underline{\text{H}}_{3a}$  +  $\underline{\text{H}}_{3b'}$  +  $\underline{\text{H}}_{4a'}$  +  $\underline{\text{H}}_{4b}$  +  $\underline{\text{H}}_{5a}$  +  $\underline{\text{H}}_6$  +  $\underline{\text{H}}_{7-8}$ ), 1.31-1.15 (11H, m,  $\underline{\text{H}}_{3b}$  +  $\underline{\text{H}}_{4b'}$  +  $\underline{\text{H}}_{5b}$  +  $\underline{\text{H}}_{7-10'}$ ), 0.85 (3H, t,  $J = 6.5$  Hz,  $\underline{\text{H}}_{11'}$ );  **$^{13}\text{C NMR}$**  (125 MHz,  $\text{CDCl}_3$ )  $\delta$  153.4, 149.9, 133.0, 131.4, 129.7, 125.0, 121.2, 78.4, 77.0, 76.1, 73.2, 55.8, 54.9, 36.5, 35.2, 31.8, 31.7, 31.2,

31.1, 29.3, 28.4, 25.5, 24.1, 23.5, 22.8, 22.6, 21.9, 14.1; **HRMS** ( $ES^+$ ) Calc. for  $C_{30}H_{45}O_4N_7SNa$   $[M+Na]^+$  622.3160, found 622.3138.

**4-[(2*S'*,6*S'*)-6'-(4-hydroxybutyl tetrahydropyran-2-yl)]-1-[(2*S''*,6*S''*)-6''-[10-[(5*S*)-3-(5-methyl-2,5-dihydrofuran-2-one)decyl-(tetrahydropyran-2-yl)methyl]]-1*H*-1,2,3-triazole (34)**

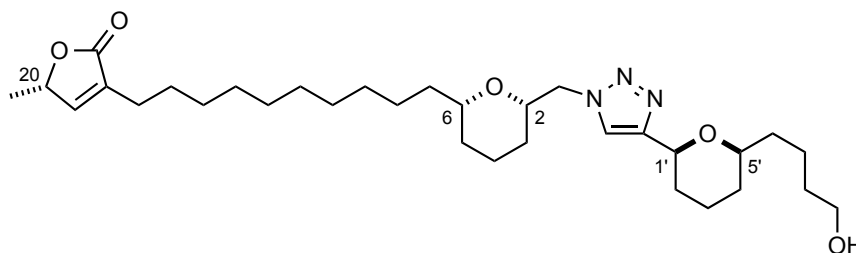

To a solution of benzyl ether **37** (11.0 mg, 16.9  $\mu$ mol) in  $CH_2Cl_2$  (2 mL) at  $-15\text{ }^\circ C$  was added  $BCl_3 \cdot DMS$  (30  $\mu$ L, 2.0 M solution in  $CH_2Cl_2$ , 60  $\mu$ mol) dropwise. TLC analysis after 3.5 h indicated incomplete reaction therefore further  $BCl_3 \cdot DMS$  (30  $\mu$ L, 2.0 M solution in  $CH_2Cl_2$ , 60  $\mu$ mol) was added dropwise and the reaction allowed to warm to RT overnight. The reaction was quenched by the addition of saturated aqueous  $NaHCO_3$  (5 mL) and the organics were extracted with  $Et_2O$  (3 x 5 mL). The combined organic extracts were dried ( $Na_2SO_4$ ), filtered and concentrated *in vacuo*. Purification by flash column chromatography (50% $\rightarrow$ 100%  $EtOAc/Hexane$ ) provided alcohol **34** (2.2 mg, 23%), as a colourless oil.

$R_f$  0.16 (50%  $EtOAc/Hexane$ );  $[\alpha]_D^{20}$   $-6.5$  ( $c$  0.2,  $CHCl_3$ ); **IR** (thin film) 2924, 2853, 1751, 1456, 1439  $cm^{-1}$ ;  **$^1H$  NMR** (500 MHz,  $CDCl_3$ )  $\delta$  7.64 (1H, s,  $H_{Ar}$ ), 6.99 (1H, s,  $H_{19}$ ), 5.00 (1H, q,  $J = 6.8$  Hz,  $H_{20}$ ), 4.61 (1H, m,  $H_{1'}$ ), 4.46 (1H, dd,  $J = 14.0, 3.0$  Hz,  $H_{1a}$ ), 4.19 (1H, dd,  $J = 14.0, 8.2$  Hz,  $H_{1b}$ ), 3.66-3.62 (1H, m,  $H_2$ ), 3.64 (t,  $J = 6.4$  Hz,  $H_{9'}$ ), 3.51-3.47 (1H, m,  $H_{5'}$ ), 3.25-3.19 (1H, m,  $H_6$ ), 2.26 (2H, t,  $J = 7.6$  Hz,  $H_{16}$ ), 2.01 (1H, app d,  $J = 13.5$  Hz,  $H_{2a'}$ ), 1.94-1.92 (1H, m,  $H_{2b'}$ ), 1.87-1.84 (1H, m,  $H_{3a'}$ ), 1.66-1.18 (33H, m,  $H_{3-5} + H_{3b'} + H_{4'} + H_{6'-8'} + H_{7-15}$ ), 1.40 (3H, d,  $J = 6.8$  Hz,  $H_{21}$ );  **$^{13}C$  NMR** (125 MHz,  $CDCl_3$ )  $\delta$  174.0, 149.6, 149.1, 134.4, 122.7, 78.5, 78.0, 77.6, 76.2, 73.1, 63.0, 55.4, 36.5, 36.2, 32.9, 31.8, 31.4, 31.3, 29.8 (2C), 29.7, 29.5, 29.4, 28.8, 27.6, 25.8, 25.3, 23.7, 23.1, 21.9, 19.4; **HRMS** ( $ES^+$ ) Calc. for  $C_{32}H_{54}O_5N_3$   $[M+H]^+$  560.4058, found 560.4046.

**4-[(2*S'*,6*S'*)-6'-(4-(benzyloxy)butyl)tetrahydropyran-2-yl]-1-[(2*S''*,6*S''*)-6''-(4-hydroxybutyl)tetrahydropyran-2-yl)methyl]-1*H*-1,2,3-triazole (35)**

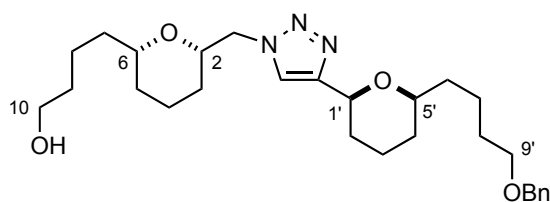

To a solution of triazole **18d** (150 mg, 0.210 mmol) in THF (5 mL) at 0 °C was TBAF (2.10 mL, 1.0 M solution in THF, 2.10 mmol) dropwise. The reaction mixture was stirred at RT for 4 h, then quenched by the addition of saturated aqueous NaHCO<sub>3</sub> (15 mL). The mixture was extracted with CH<sub>2</sub>Cl<sub>2</sub> (3 x 15 mL) and the combined organics dried (MgSO<sub>4</sub>), filtered and concentrated *in vacuo*. Purification by flash column chromatography (70% EtOAc/Hexane) provided alcohol **35** (84.0 mg, 83%), as a colourless oil.

**R<sub>f</sub>** 0.21 (50% EtOAc/Hexane);  $[\alpha]_{\text{D}}^{20}$  -94.6 (*c* 2.6, CHCl<sub>3</sub>); **IR** (thin film) 3005, 2939, 2860, 1558, 1541 cm<sup>-1</sup>; **<sup>1</sup>H NMR** (300 MHz, CDCl<sub>3</sub>) δ 7.56 (1H, s, H<sub>Ar</sub>), 7.30-7.17 (5H, m, ArH), 4.53 (1H, dd, *J* = 10.8, 1.8 Hz, H<sub>1'</sub>), 4.43 (2H, s, OCH<sub>2</sub>Ar), 4.38 (1H, dd, *J* = 14.0, 2.8 Hz, H<sub>1a</sub>), 4.12 (1H, dd, *J* = 14.0, 8.3 Hz, H<sub>1b</sub>), 3.59 (1H, app qt, *J* = 8.3, 2.8 Hz, H<sub>2</sub>), 3.51 (2H, t, *J* = 6.3 Hz, H<sub>10</sub>), 3.47-3.43 (1H, m, H<sub>5'</sub>), 3.40 (2H, t, *J* = 6.5 Hz, H<sub>9'</sub>), 3.15 (1H, app t, *J* = 9.3 Hz, H<sub>6</sub>), 2.00-1.70 (5H, m, H<sub>3a'</sub> + H<sub>4</sub> + H<sub>9</sub>), 1.62-1.14 (19H, m, H<sub>2'</sub> + H<sub>3</sub> + H<sub>3b'</sub> + H<sub>5-8</sub> + H<sub>4'-8'</sub>); **<sup>13</sup>C NMR** (75 MHz, CDCl<sub>3</sub>) δ 149.9, 138.7, 128.5, 127.7, 127.6, 122.4, 78.5, 77.7, 76.3, 73.5, 73.0, 70.5, 62.8, 55.1, 36.4, 35.9, 32.6, 31.8, 31.4, 31.3, 29.9, 28.7, 23.7, 23.1, 22.3, 21.8; **HRMS** (ES<sup>+</sup>) Calc. for C<sub>28</sub>H<sub>44</sub>O<sub>4</sub>N<sub>3</sub> [M+H]<sup>+</sup> 486.3326, found 486.3315.

**4-[(2*S'*,6*S'*)-6'-[4-(benzyloxy)butyltetrahydropyran-2-yl]-1-[(2*S''*,6*S''*)-6''-(4-(sulfonyl-1-phenyl-1*H*-1,2,3,4-tetrazolyl)butyltetrahydropyran-2-yl)methyl]-1*H*-1,2,3-triazole (36)**

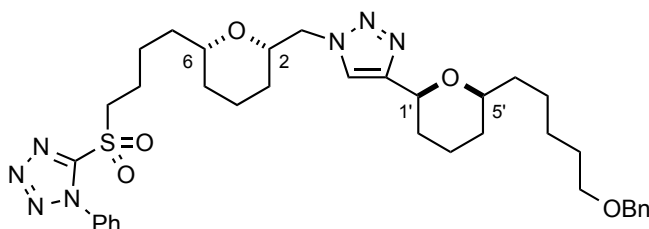

To a solution of alcohol **35** (84.0 mg, 173 μmol) in THF (2 mL) at 0 °C was added 1-phenyl-1*H*-tetrazole-5-thiol (46.0 mg, 260 μmol) and PPh<sub>3</sub> (68.0 mg, 260 μmol) followed by DIAD (51.0 μL, 260 μmol) dropwise. The reaction mixture was warmed to RT overnight then quenched by the addition of saturated aqueous NH<sub>4</sub>Cl (10 mL) and EtOAc

(10 mL). The organics were extracted with EtOAc (2 × 10 mL), dried (Na<sub>2</sub>SO<sub>4</sub>), filtered and concentrated *in vacuo*. Purification by flash column chromatography (40→50% EtOAc/Hexane) provided 4-[(2*S'*,6*S'*)-6'--(4-(benzyloxy)butyltetrahydropyran-2-yl)]-1-[(2*S''*,6*S''*)-6''-(4-(sulfanyl-1-phenyl-1*H*-1,2,3,4-tetrazolyl)butyltetrahydropyran-2-yl)methyl]-1*H*-1,2,3-triazole (100 mg) as a colourless oil.

To a solution of 4-[(2*S'*,6*S'*)-6'--(4-(benzyloxy)butyltetrahydropyran-2-yl)]-1-[(2*S''*,6*S''*)-6''-(4-(sulfanyl-1-phenyl-1*H*-1,2,3,4-tetrazolyl)butyltetrahydropyran-2-yl)methyl]-1*H*-1,2,3-triazole (100 mg, 154 μmol) in MeOH (3 mL) at 0 °C was added a mixture of ammonium molybdate (95.0 mg, 77.0 μmol) and H<sub>2</sub>O<sub>2</sub> (350 μL, 30% v/v solution in H<sub>2</sub>O, 3.08 mmol). After 16 h at RT, the reaction mixture was diluted with MeOH (5 mL) and H<sub>2</sub>O (5 mL). The organics were extracted with CH<sub>2</sub>Cl<sub>2</sub> (3 × 10 mL) and the combined organic layers washed with brine (30 mL), dried (MgSO<sub>4</sub>), filtered and concentrated *in vacuo*. Purification by flash column chromatography (40% EtOAc/Hexane) provided sulfone **36** (82.0 mg, 68%, 2 steps), as a colourless oil.

**R<sub>f</sub>** 0.45 (50% Acetone/Hexane); [ $\alpha$ ]<sub>D</sub><sup>20</sup> -12.9 (*c* 1.6, CHCl<sub>3</sub>); **IR** (thin film) 2934, 2918, 2859, 1595, 1497, 1339 cm<sup>-1</sup>; **<sup>1</sup>H NMR** (500 MHz, CDCl<sub>3</sub>)  $\delta$  7.69 (2H, dt, *J* = 6.5, 1.5 Hz, ArH), 7.63-7.57 (4H, m, ArH + H<sub>Ar</sub>), 7.34-7.31 (4H, m, ArH), 7.29-7.24 (1H, m, ArH), 4.59 (1H, dd, *J* = 10.9, 1.7 Hz, H<sub>1'</sub>), 4.48 (2H, s, OCH<sub>2</sub>Ar), 4.42 (1H, dd, *J* = 14.0, 3.5 Hz, H<sub>1a</sub>), 4.20 (1H, dd, *J* = 14.0, 8.1 Hz, H<sub>1b</sub>), 3.73-3.64 (3H, m, H<sub>2</sub> + H<sub>10</sub>), 3.49-3.44 (1H, m, H<sub>5'</sub>), 3.45 (2H, t, *J* = 6.6 Hz, H<sub>9'</sub>), 3.22 (1H, app t, *J* = 8.3 Hz, H<sub>6</sub>), 2.04-2.01 (1H, m, H<sub>2a'</sub>), 1.96-1.83 (4H, m, H<sub>3a'</sub> + H<sub>4a</sub> + H<sub>9</sub>), 1.70-1.38 (15H, m, H<sub>2b'</sub> + H<sub>3</sub> + H<sub>3b'</sub> + H<sub>4'</sub> + H<sub>4b</sub> + H<sub>5</sub> + H<sub>6'</sub> + H<sub>7-8</sub>), 1.32-1.13 (4H, m, H<sub>7'-8'</sub>); **<sup>13</sup>C NMR** (125 MHz, CDCl<sub>3</sub>)  $\delta$  153.5, 150.0, 138.8, 133.1, 131.6, 129.9, 128.5, 127.8, 127.6, 125.1, 122.3, 78.5, 77.2, 76.3, 73.3, 73.0, 70.5, 56.0, 55.1, 36.4, 35.4, 31.9, 31.3, 31.2, 29.9, 28.6, 24.2, 23.7, 23.0, 22.3, 22.1; **HRMS** (ES<sup>+</sup>) Calc. for C<sub>35</sub>H<sub>48</sub>O<sub>5</sub>N<sub>7</sub>S [M+H]<sup>+</sup> 678.3432, found 678.3429.

**4-[(2*S'*,6*S'*)-6'--(4-(benzyloxy)butyl tetrahydropyran-2-yl)]-1-[(2*S''*,6*S''*)-6''-[10-[(5*S*)-3-(5-methyl-2,5-dihydrofuran-2-one)decyl-(tetrahydropyran-2-yl)methyl]-1*H*-1,2,3-triazole (37)**

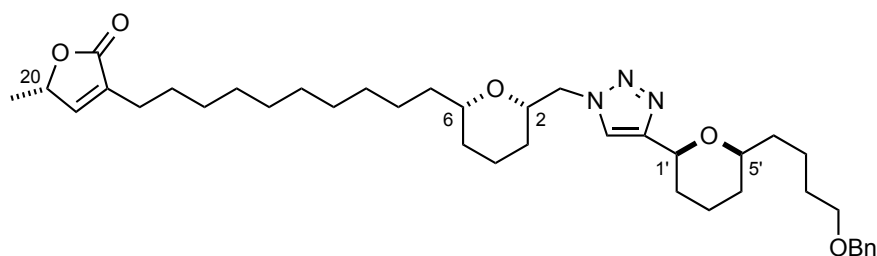

Sulfone **36** (53.0 mg, 78.2  $\mu\text{mol}$ ) was azeotroped 3 times with toluene then suspended in THF (2 mL) at  $-78\text{ }^\circ\text{C}$  and NaHMDS (235  $\mu\text{L}$ , 0.40 M solution in THF, 94.0  $\mu\text{mol}$ ) was added. After 10 min, a solution of aldehyde **30** (45.0 mg, 229  $\mu\text{mol}$ ) in THF (1 mL) was added dropwise *via* cannula. After 1 h, the reaction was allowed to come up to RT. After 2 h further stirring, saturated aqueous  $\text{NH}_4\text{Cl}$  (5 mL) was added. The organics were extracted with EtOAc (3 x 5 mL) and the combined organic extracts were washed with brine (10 mL), dried ( $\text{MgSO}_4$ ), filtered and concentrated *in vacuo*. Purification by flash column chromatography (30 $\rightarrow$ 40% EtOAc/Hexane) provided 4-[(2*S'*,6*S'*)-6'-(4-(benzyloxy)butyl)tetrahydropyran-2-yl]-1-[(2*S''*,6*S''*)-6''-[(4*E*)-10-[(5*S*)-3-(5-methyl-2,5-dihydrofuran-2-one)dec-4-ene-(tetrahydropyran-2-yl)methyl]-1*H*-1,2,3-triazole (34.0 mg, 67%) as a colourless oil.

$R_f$  0.61 (50% EtOAc/Hexane);  $[\alpha]_D^{20}$   $-5.8$  ( $c$  0.5,  $\text{CHCl}_3$ ); **IR** (thin film) 2930, 2855, 1749  $\text{cm}^{-1}$ ;  **$^1\text{H NMR}$**  (300 MHz,  $\text{CDCl}_3$ )  $\delta$  7.62 (1H, s,  $\underline{\text{H}}_{\text{Ar}}$ ), 7.33-7.30 (4H, m,  $\text{ArH}$ ), 7.29-7.24 (1H, m,  $\text{ArH}$ ), 6.97 (1H, app q,  $J = 1.6$  Hz,  $\underline{\text{H}}_{19}$ ), 5.37-5.33 (2H, m,  $\underline{\text{H}}_{10-11}$ ), 4.98 (1H, app qq,  $J = 6.7, 1.6$  Hz,  $\underline{\text{H}}_{20}$ ), 4.59 (1H, dd,  $J = 10.7, 1.8$  Hz,  $\underline{\text{H}}_1$ ), 4.48 (2H, s,  $\text{OCH}_2\text{Ar}$ ), 4.44 (1H, dd,  $J = 14.0, 3.4$  Hz,  $\underline{\text{H}}_{1a}$ ), 4.19 (1H, dd,  $J = 14.0, 8.1$  Hz,  $\underline{\text{H}}_{1b}$ ), 3.67-3.59 (1H, m,  $\underline{\text{H}}_2$ ), 3.50-3.42 (1H, m,  $\underline{\text{H}}_5$ ), 3.46 (2H, t,  $J = 6.5$  Hz,  $\underline{\text{H}}_9$ ), 3.22-3.17 (1H, m,  $\underline{\text{H}}_6$ ), 2.28-2.22 (2H, m,  $\underline{\text{H}}_{16}$ ), 2.03-1.83 (7H, m,  $\underline{\text{H}}_{2a'}$  +  $\underline{\text{H}}_{3a'}$  +  $\underline{\text{H}}_{4a}$  +  $\underline{\text{H}}_9$  +  $\underline{\text{H}}_{12}$ ), 1.69-1.14 (25H, m,  $\underline{\text{H}}_{2b'}$  +  $\underline{\text{H}}_3$  +  $\underline{\text{H}}_{3b'}$  +  $\underline{\text{H}}_{4b}$  +  $\underline{\text{H}}_{4'}$  +  $\underline{\text{H}}_5$  +  $\underline{\text{H}}_{7-8}$  +  $\underline{\text{H}}_{6'-8'}$  +  $\underline{\text{H}}_{13-15}$ ), 1.39 (3H, d,  $J = 6.7$  Hz,  $\underline{\text{H}}_{21}$ );  **$^{13}\text{C NMR}$**  (75 MHz,  $\text{CDCl}_3$ )  $\delta$  173.6, 150.0, 149.0, 138.8, 134.4, 130.5, 130.3, 129.9, 127.8, 127.6, 122.5, 78.4, 77.8, 77.4, 76.3, 73.3, 73.0, 70.5, 55.1, 36.4, 35.9, 32.6, 32.5, 31.9, 31.4, 29.9, 29.4, 28.9, 28.8, 27.4, 25.7, 25.3, 23.8, 23.1, 22.3, 19.4; **HRMS** ( $\text{ES}^+$ ) Calc. for  $\text{C}_{39}\text{H}_{58}\text{O}_5\text{N}_3$   $[\text{M}+\text{H}]^+$  648.4371, found 648.4365.

To a solution of 4-[(2*S'*,6*S'*)-6'-(4-(benzyloxy)butyl)tetrahydropyran-2-yl]-1-[(2*S''*,6*S''*)-6''-[(4*E*)-10-[(5*S*)-3-(5-methyl-2,5-dihydrofuran-2-one)dec-4-ene-(tetrahydropyran-2-yl)methyl]-1*H*-1,2,3-triazole (34.0 mg, 52.5  $\mu\text{mol}$ ) and  $\text{TsNHNH}_2$  (595 mg, 3.19 mmol) in DME (2 mL) at reflux was added a solution of NaOAc (432 mg, 3.19 mmol) in  $\text{H}_2\text{O}$  (1.5 mL) over 3 h. The reaction mixture was cooled and diluted with  $\text{H}_2\text{O}$  (3 mL) and

EtOAc (5 mL) and the organics were extracted with EtOAc (2 x 5 mL). The combined organic extracts were washed with 3 N HCl (3 x 5 mL), NaHCO<sub>3</sub> (10 mL), brine (10 mL), dried (MgSO<sub>4</sub>), filtered and concentrated *in vacuo*. Purification by flash column chromatography (40% EtOAc/Hexane) then a second column (75→90% Et<sub>2</sub>O/Hexane) provided alkane **37** (22.0 mg, 65%) as a colourless oil.

**R<sub>f</sub>** 0.12 (30% EtOAc/Hexane); [ $\alpha$ ]<sub>D</sub><sup>20</sup> -7.2 (*c* 0.5, CHCl<sub>3</sub>); **IR** (thin film) 2926, 2853, 1751, 1717, 1454, 1439 cm<sup>-1</sup>; **<sup>1</sup>H NMR** (500 MHz, CDCl<sub>3</sub>)  $\delta$  7.65 (1H, s, H<sub>Ar</sub>), 7.33-7.30 (4H, m, ArH), 7.29-7.24 (1H, m, ArH), 6.98 (1H, s, H<sub>19</sub>), 4.99 (1H, q, *J* = 6.9 Hz, H<sub>20</sub>), 4.61 (1H, d, *J* = 10.7 Hz, H<sub>17</sub>), 4.49 (2H, s, OCH<sub>2</sub>Ar), 4.45 (1H, dd, *J* = 14.0, 2.9 Hz, H<sub>1a</sub>), 4.19 (1H, dd, *J* = 14.0, 8.2 Hz, H<sub>1b</sub>), 3.64 (1H, app t, *J* = 9.6 Hz, H<sub>2</sub>), 3.50-3.45 (1H, m, H<sub>5'</sub>), 3.46 (2H, t, *J* = 6.5 Hz, H<sub>9</sub>), 3.20 (1H, app t, *J* = 9.1 Hz, H<sub>6</sub>), 2.27-2.24 (2H, m, H<sub>16</sub>), 2.09-2.00 (1H, m, H<sub>2a'</sub>), 1.93-1.79 (6H, m, H<sub>2b'</sub> + H<sub>3a'</sub> + H<sub>9</sub> + H<sub>12</sub>), 1.65-1.13 (29H, m, H<sub>3b'</sub> + H<sub>4-5</sub> + H<sub>4'</sub> + H<sub>6'-9'</sub> + H<sub>7-8</sub> + H<sub>10-11</sub> + H<sub>13-15</sub>), 1.40 (3H, d, *J* = 6.9 Hz, H<sub>21</sub>); **<sup>13</sup>C NMR** (125 MHz, CDCl<sub>3</sub>)  $\delta$  174.1, 149.7, 149.0, 138.8, 134.4, 128.5, 127.8, 127.6, 122.7, 78.4, 78.0, 77.6, 76.2, 73.2, 73.0, 70.5, 55.3, 36.5, 36.4, 31.9, 31.4, 31.3, 29.9, 29.8 (2C), 29.7, 29.5, 29.4, 27.6, 25.8, 23.1, 22.3, 19.4, 14.1; **HRMS** (ES<sup>+</sup>) Calc. for C<sub>39</sub>H<sub>60</sub>O<sub>5</sub>N<sub>3</sub> [M+H]<sup>+</sup> 650.4527, found 650.4511.

**4-[(2*S'*,6*S'*)-6'-(4-hydroxybutyl)tetrahydropyran-2-yl]-1-[(2*S''*,6*S''*)-6''-(4-hydroxybutyl)tetrahydropyran-2-yl)methyl]-1*H*-1,2,3-triazole (**38**)**

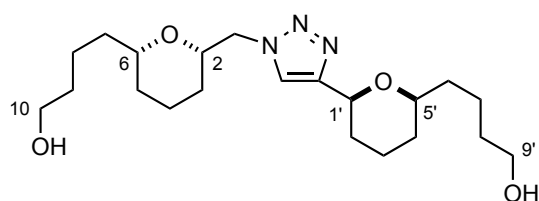

General procedure B was followed with benzyl ether **35** (12.0 mg, 24.7  $\mu$ mol) in EtOH (2 mL) to which was added Pd(OH)<sub>2</sub> on carbon (3.50 mg, 20% wt on carbon, 4.90  $\mu$ mol). Standard work-up and purification by flash column chromatography (1% MeOH/EtOAc) provided alcohol **38** (7.0 mg, 71%), as a colourless oil.

**R<sub>f</sub>** 0.13 (EtOAc); [ $\alpha$ ]<sub>D</sub><sup>20</sup> -22.6 (*c* 0.7, CHCl<sub>3</sub>); **IR** (thin film) 3402, 3017, 2940, 2862 cm<sup>-1</sup>; **<sup>1</sup>H NMR** (400 MHz, CDCl<sub>3</sub>)  $\delta$  7.65 (1H, s, H<sub>Ar</sub>), 4.60 (1H, d, *J* = 10.7 Hz, H<sub>17</sub>), 4.45 (1H, dd, *J* = 14.0, 2.8 Hz, H<sub>1a</sub>), 4.21 (1H, dd, *J* = 14.0, 8.4 Hz, H<sub>1b</sub>), 3.71-3.64 (3H, m, H<sub>2</sub> + H<sub>9</sub>), 3.58 (2H, t, *J* = 6.4 Hz, H<sub>10</sub>), 3.54-3.46 (1H, m, H<sub>5'</sub>), 3.23 (1H, app t, *J* = 9.5 Hz, H<sub>6</sub>),



2.08-1.85 (5H, m,  $\underline{H}_{3a'}$  +  $\underline{H}_4$  +  $\underline{H}_9$ ), 1.62-1.17 (19H, m,  $\underline{H}_{2'}$  +  $\underline{H}_3$  +  $\underline{H}_{3b'}$  +  $\underline{H}_{5-8}$  +  $\underline{H}_{4'-8'}$ );  $^{13}\text{C}$  NMR (125 MHz,  $\text{CDCl}_3$ )  $\delta$  149.7, 122.4, 78.6, 77.7, 76.3, 73.5, 62.7 (2C), 55.2, 36.0, 35.9, 32.7, 32.6, 31.7, 31.4, 31.3, 28.7, 23.7, 23.1, 21.8 (2C); HRMS ( $\text{ES}^+$ ) Calc. for  $\text{C}_{21}\text{H}_{38}\text{O}_4\text{N}_3$   $[\text{M}+\text{H}]^+$  396.2857, found 396.2852.

## References

---

- <sup>1</sup> a) G. J. Florence, J. C. Morris, R. G. Murray, R. R. Vanga, J. D. Osler, T. K. Smith, *Org. Lett.* **2011**, *13*, 514-517; b) G. J. Florence, J. C. Morris, R. G. Murray, R. R. Vanga, J. D. Osler, T. K. Smith, *Chem. Eur. J.* **2013**, *19*, 8309-8320.
- <sup>2</sup> V. Rawat, P. V. Chouthaiwale, G. Suryavanshi, A. Sudalai, *Tetrahedron: Asymmetry* **2009**, *20*, 2173-8320.
- <sup>3</sup> S. E. Schaus, B. D. Brandes, J. F. Larrow, M. Tokunaga, K. B. Hansen, A. E. Gould, M. E. Furrow, E. N. Jacobsen, *J. Am. Chem. Soc.* **2002**, *124*, 1307-1315.
- <sup>4</sup> C. Cook, X. Guinchard, F. Liron, E. Roulland, *Org. Lett.* **2010**, *12*, 744-747.
- <sup>5</sup> G. C. Paddon-Jones, C. S. P. McErlean, P. Hayes, C. J. Moore, W. A. Konig, W. Kitching, *J. Org. Chem.* **2001**, *66*, 7487-7495.
- <sup>6</sup> R. V. Reddy, University of St Andrews, PhD thesis, **2009**.

## **Appendix**

### **$^1\text{H}$ and $^{13}\text{C}$ NMR spectra for selected novel compounds**

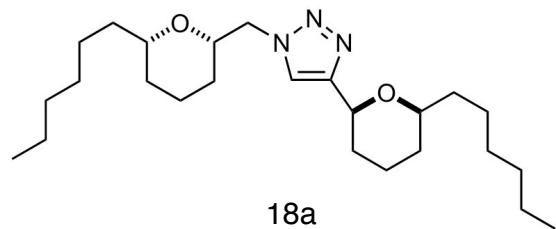

$^1\text{H}$  NMR ( $\text{CDCl}_3$ , 400 MHz)

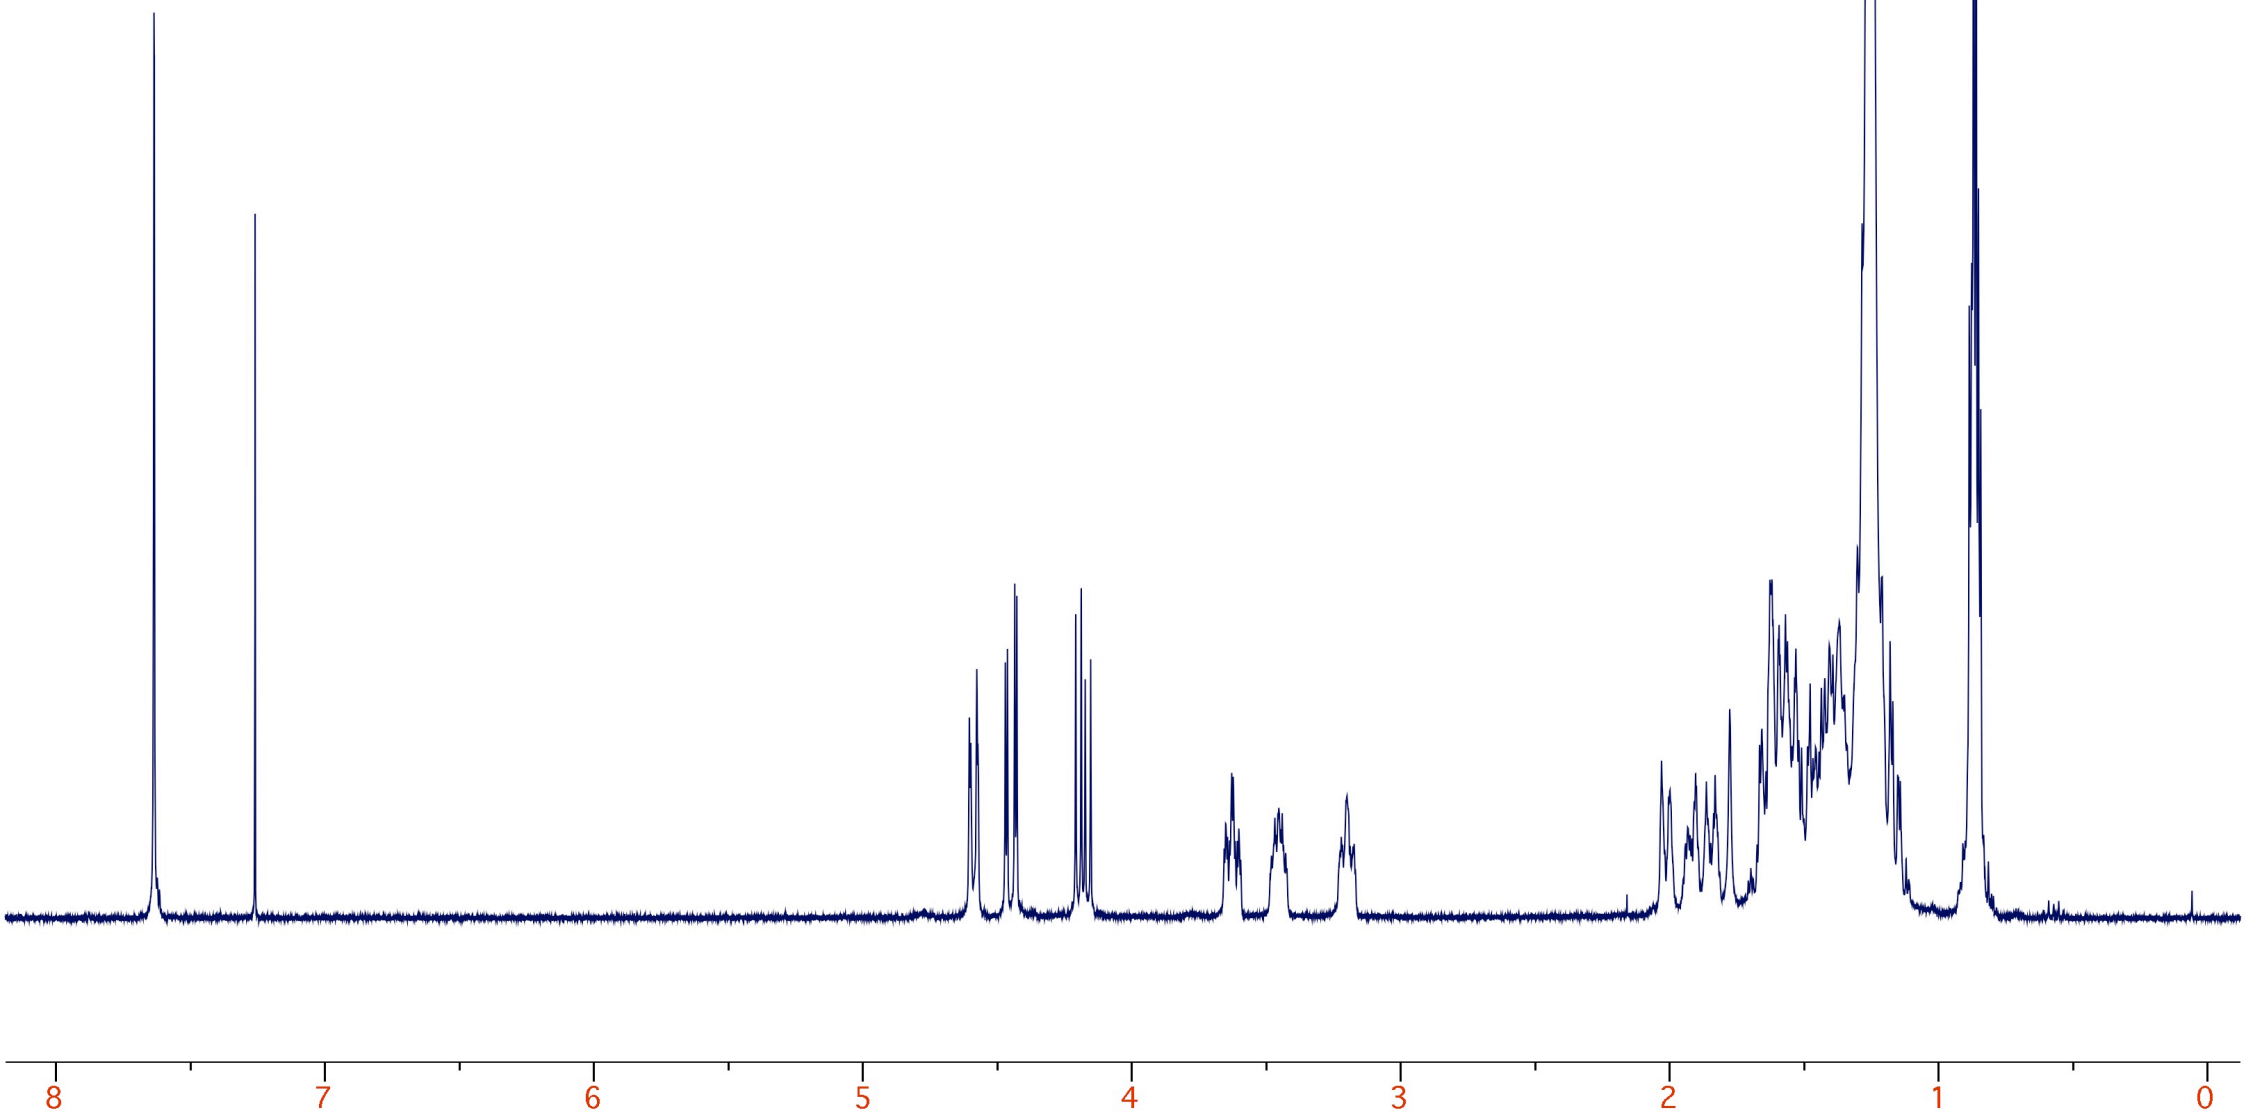

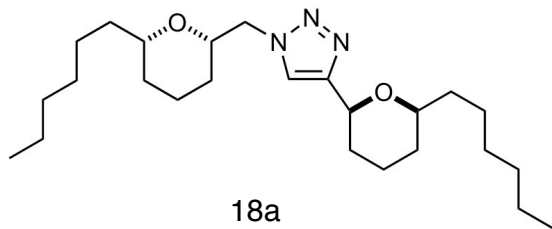

18a  
 $^{13}\text{C}$  NMR ( $\text{CDCl}_3$ , 100 MHz)

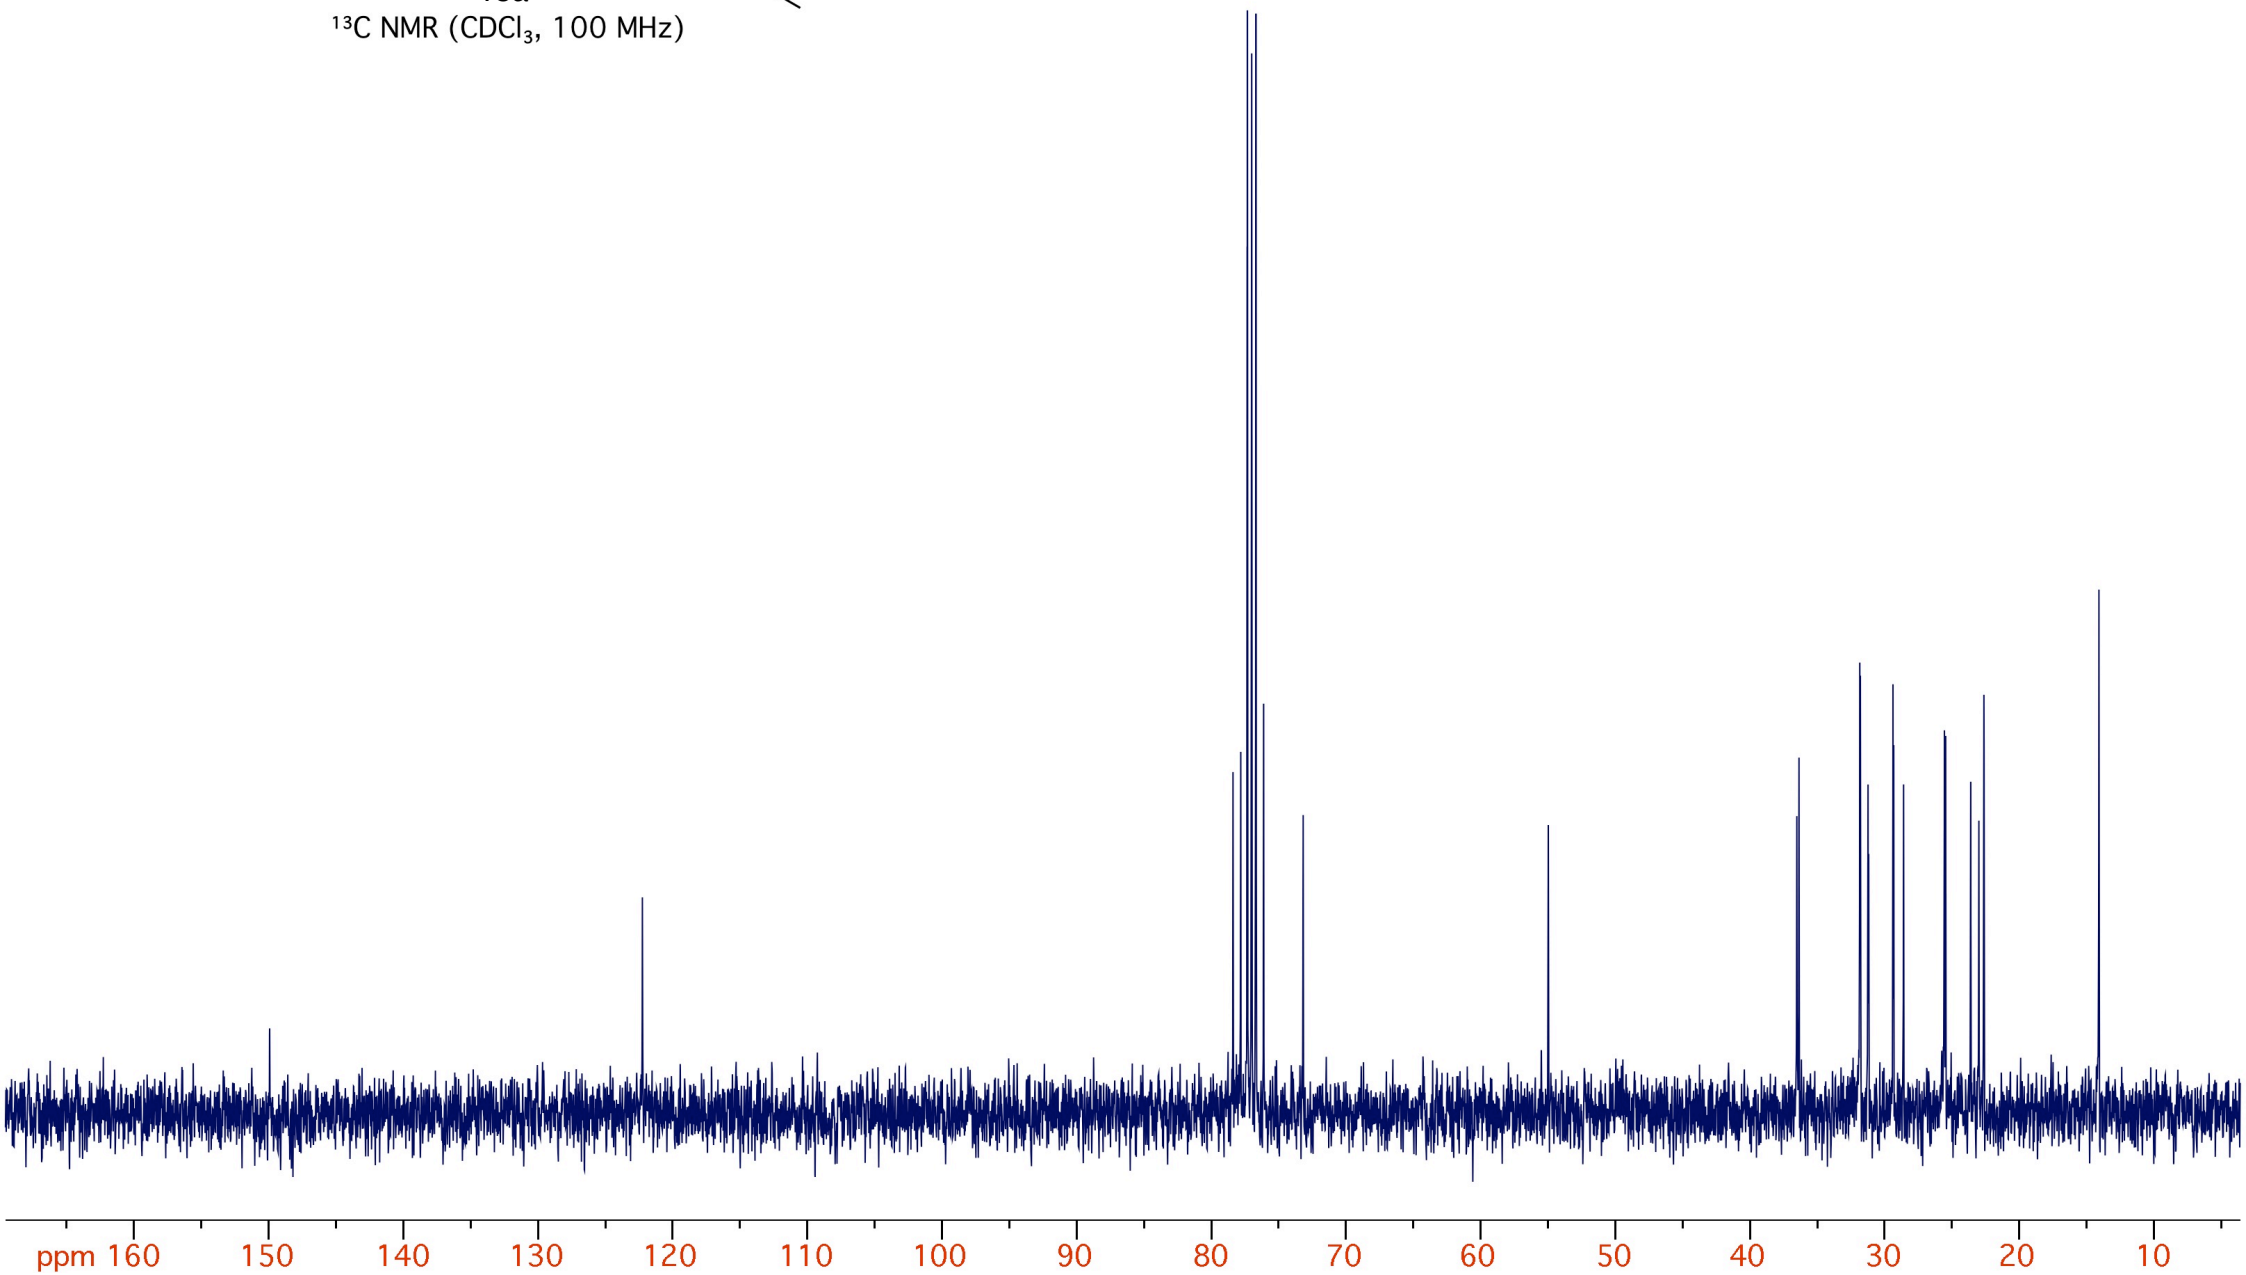

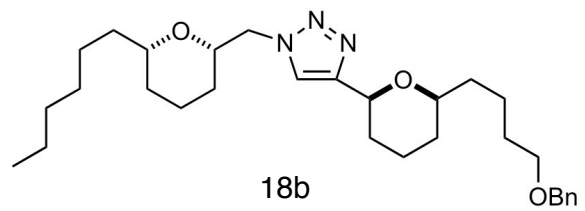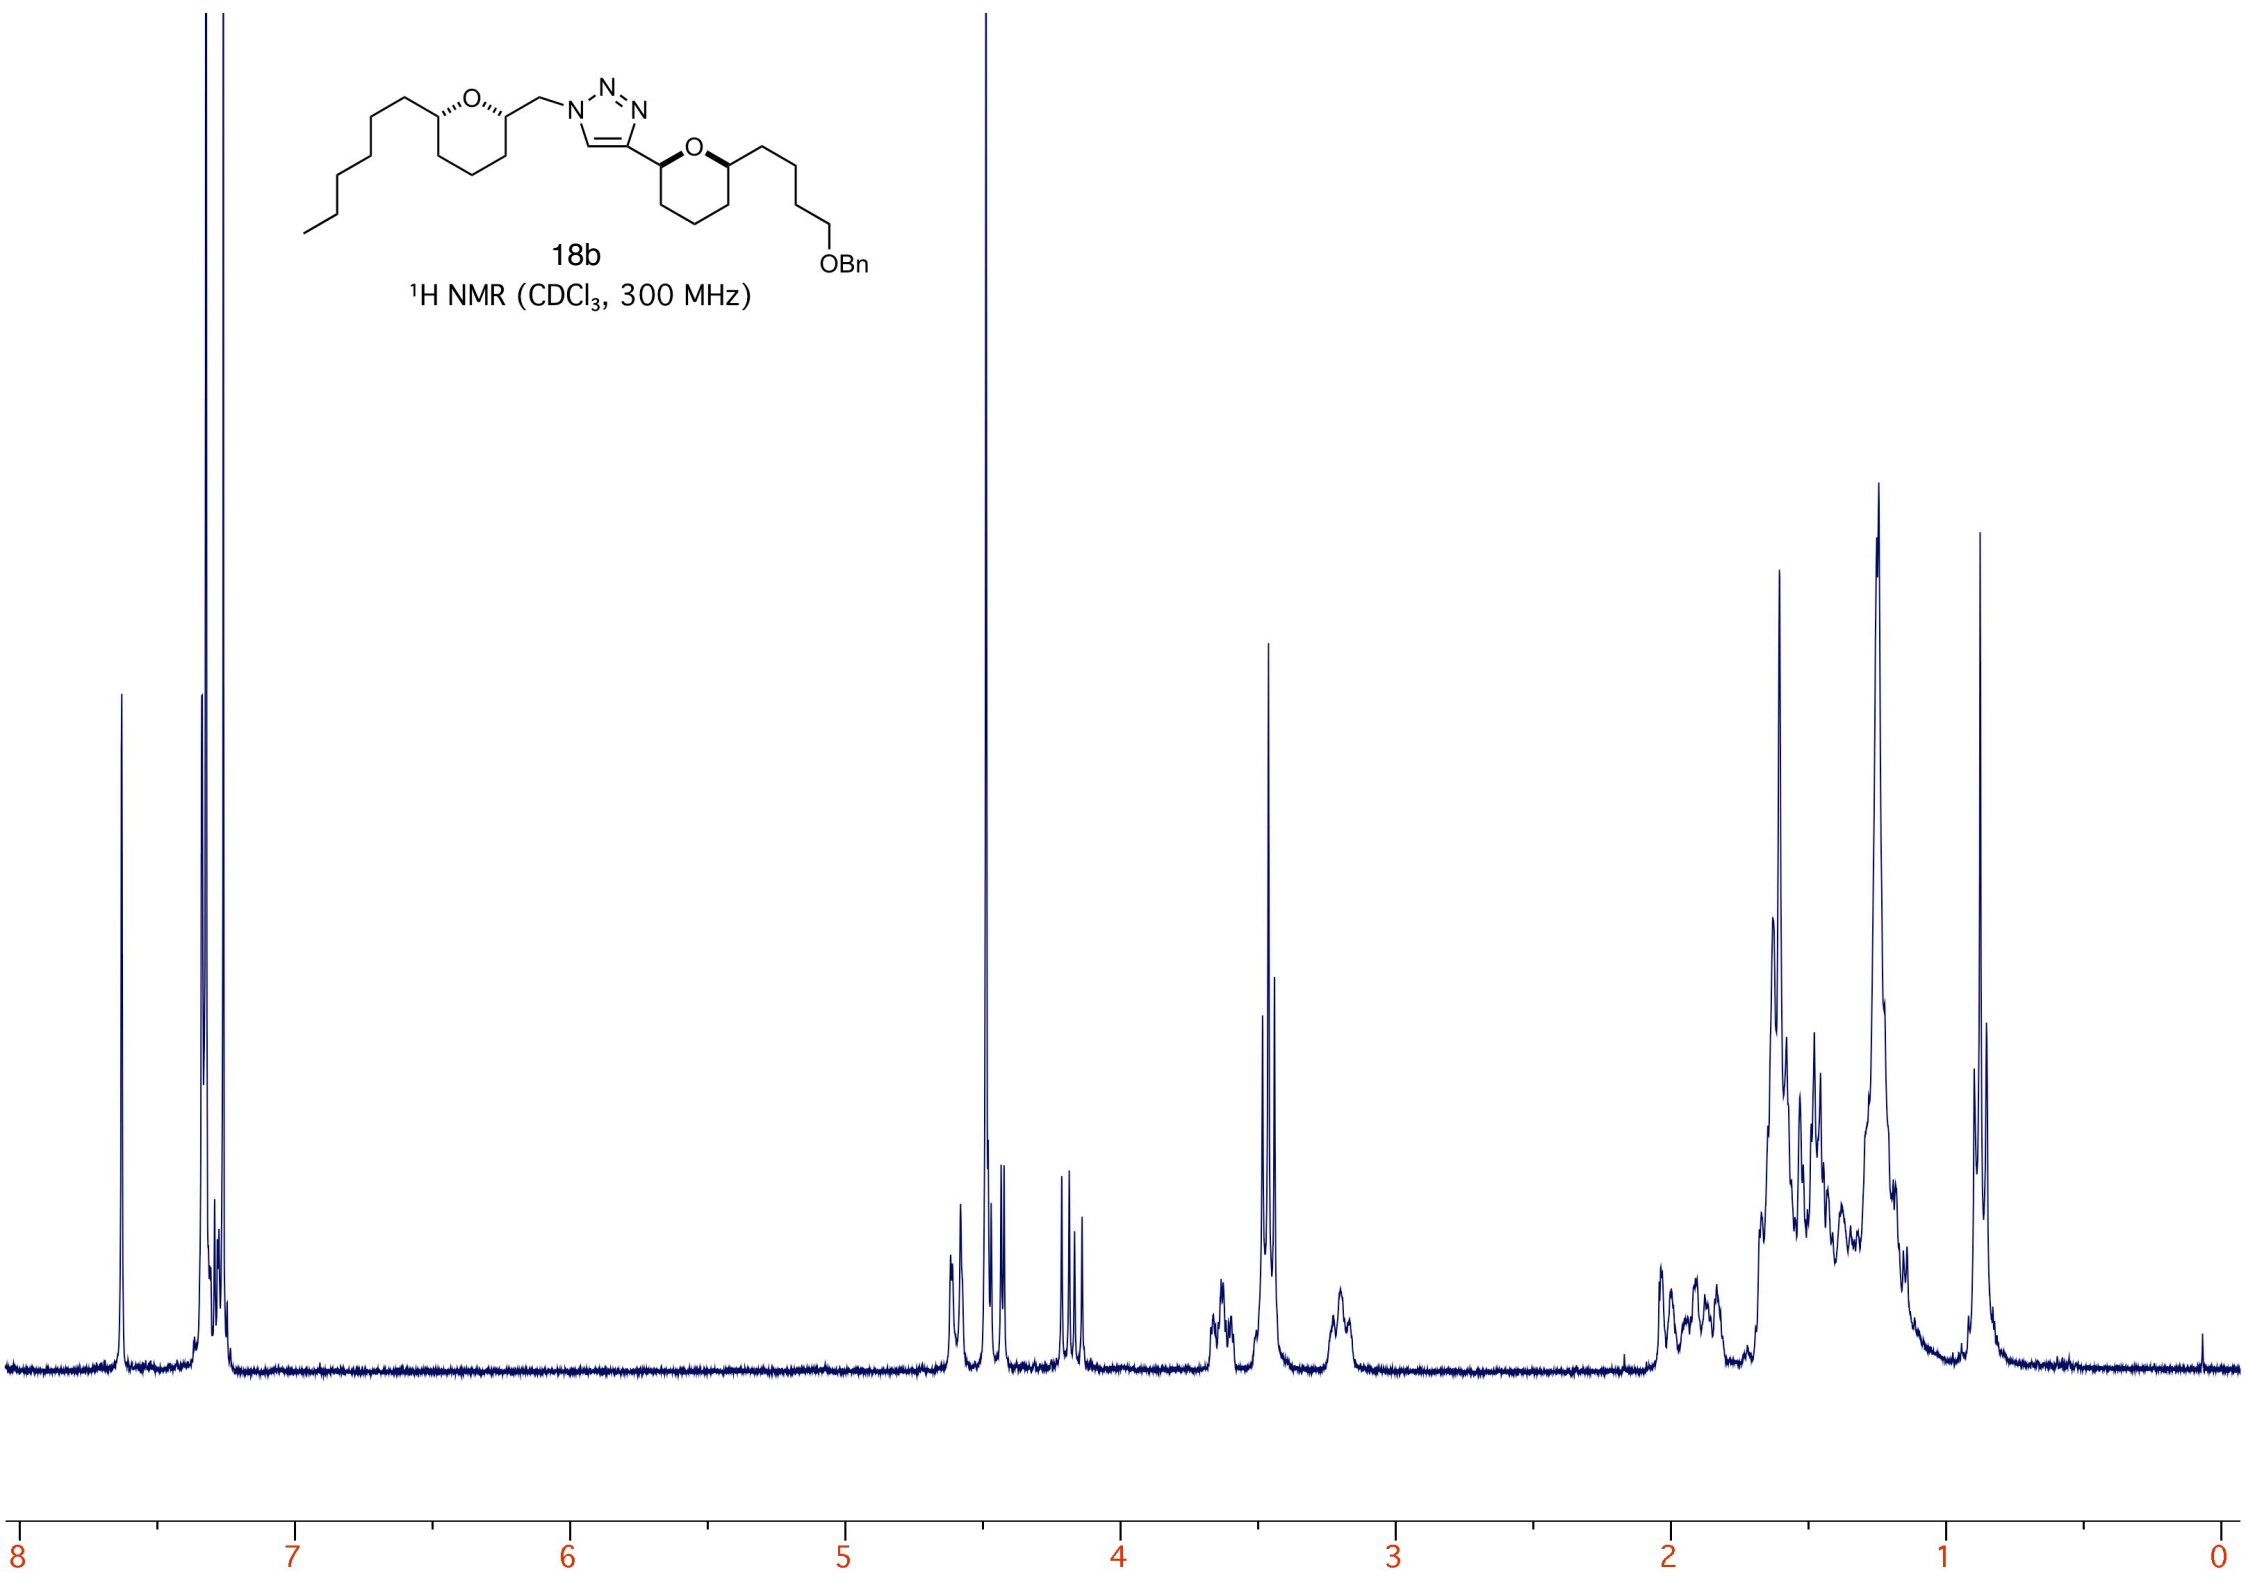

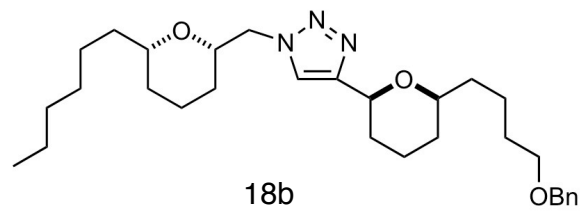

$^{13}\text{C}$  NMR ( $\text{CDCl}_3$ , 75 MHz)

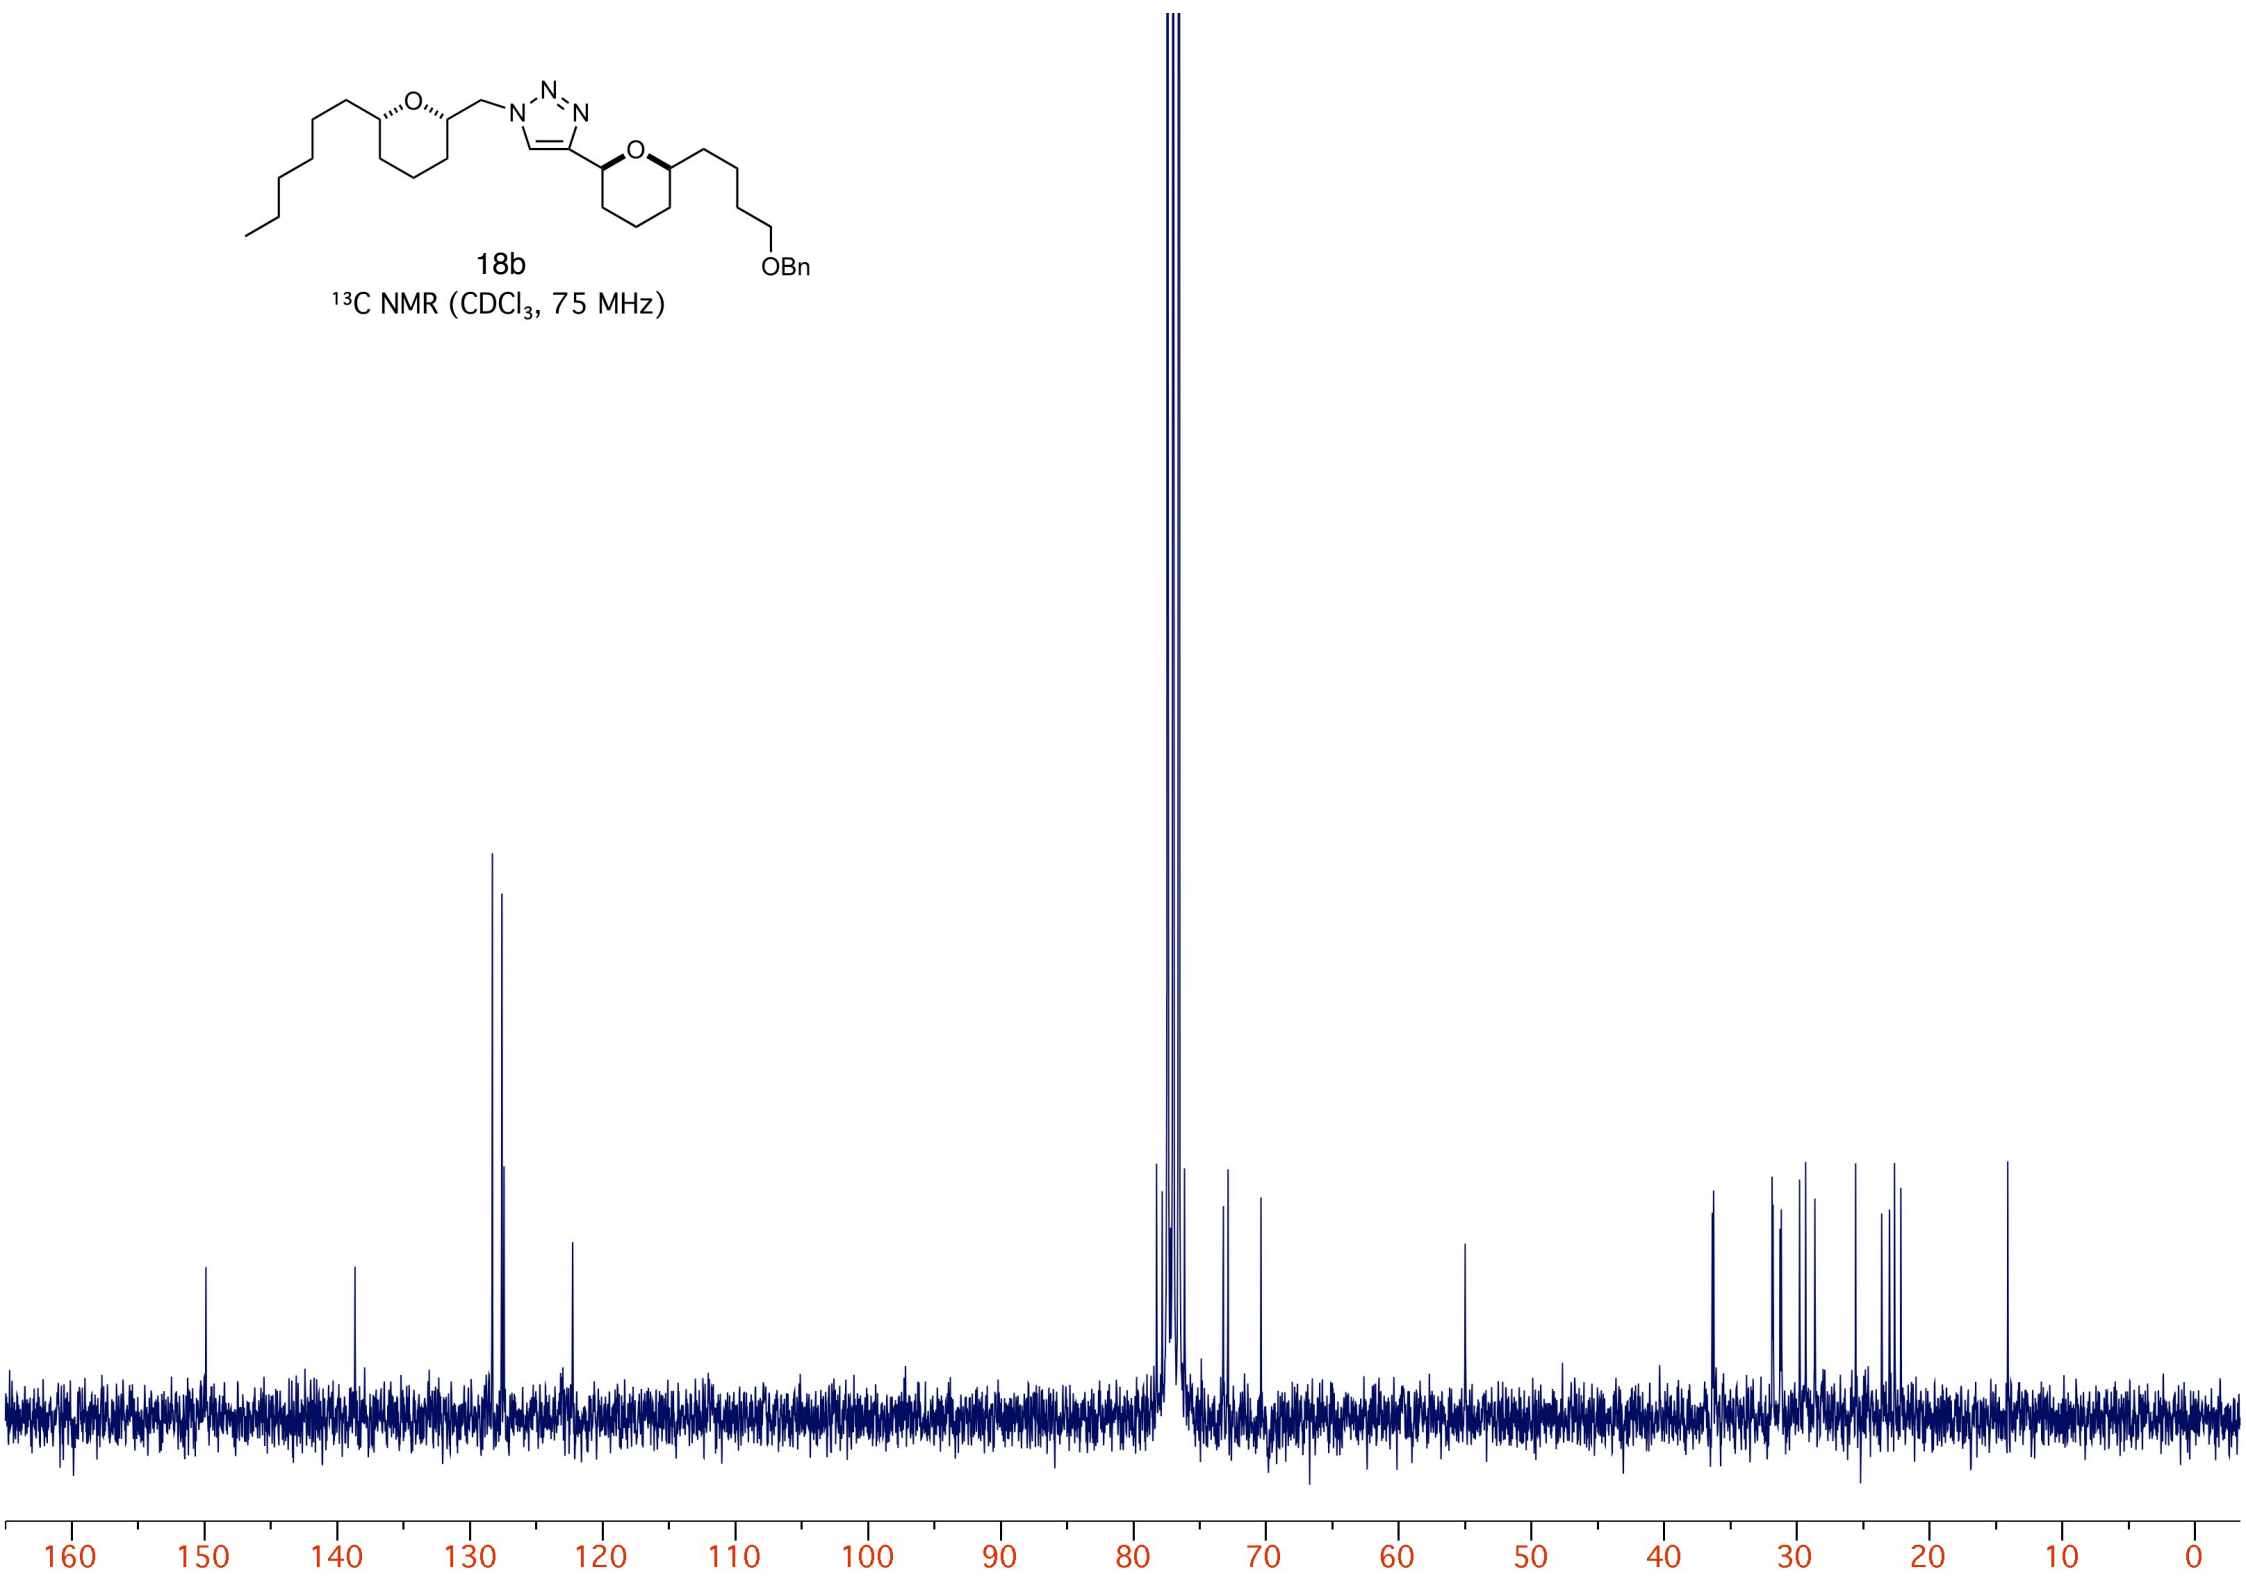

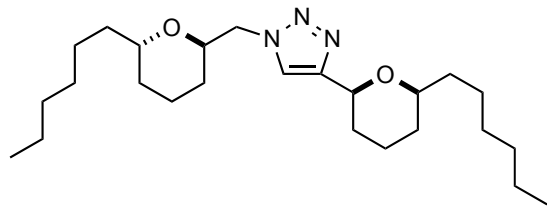

19a

$^1\text{H NMR}$  ( $\text{CDCl}_3$ , 400 MHz)

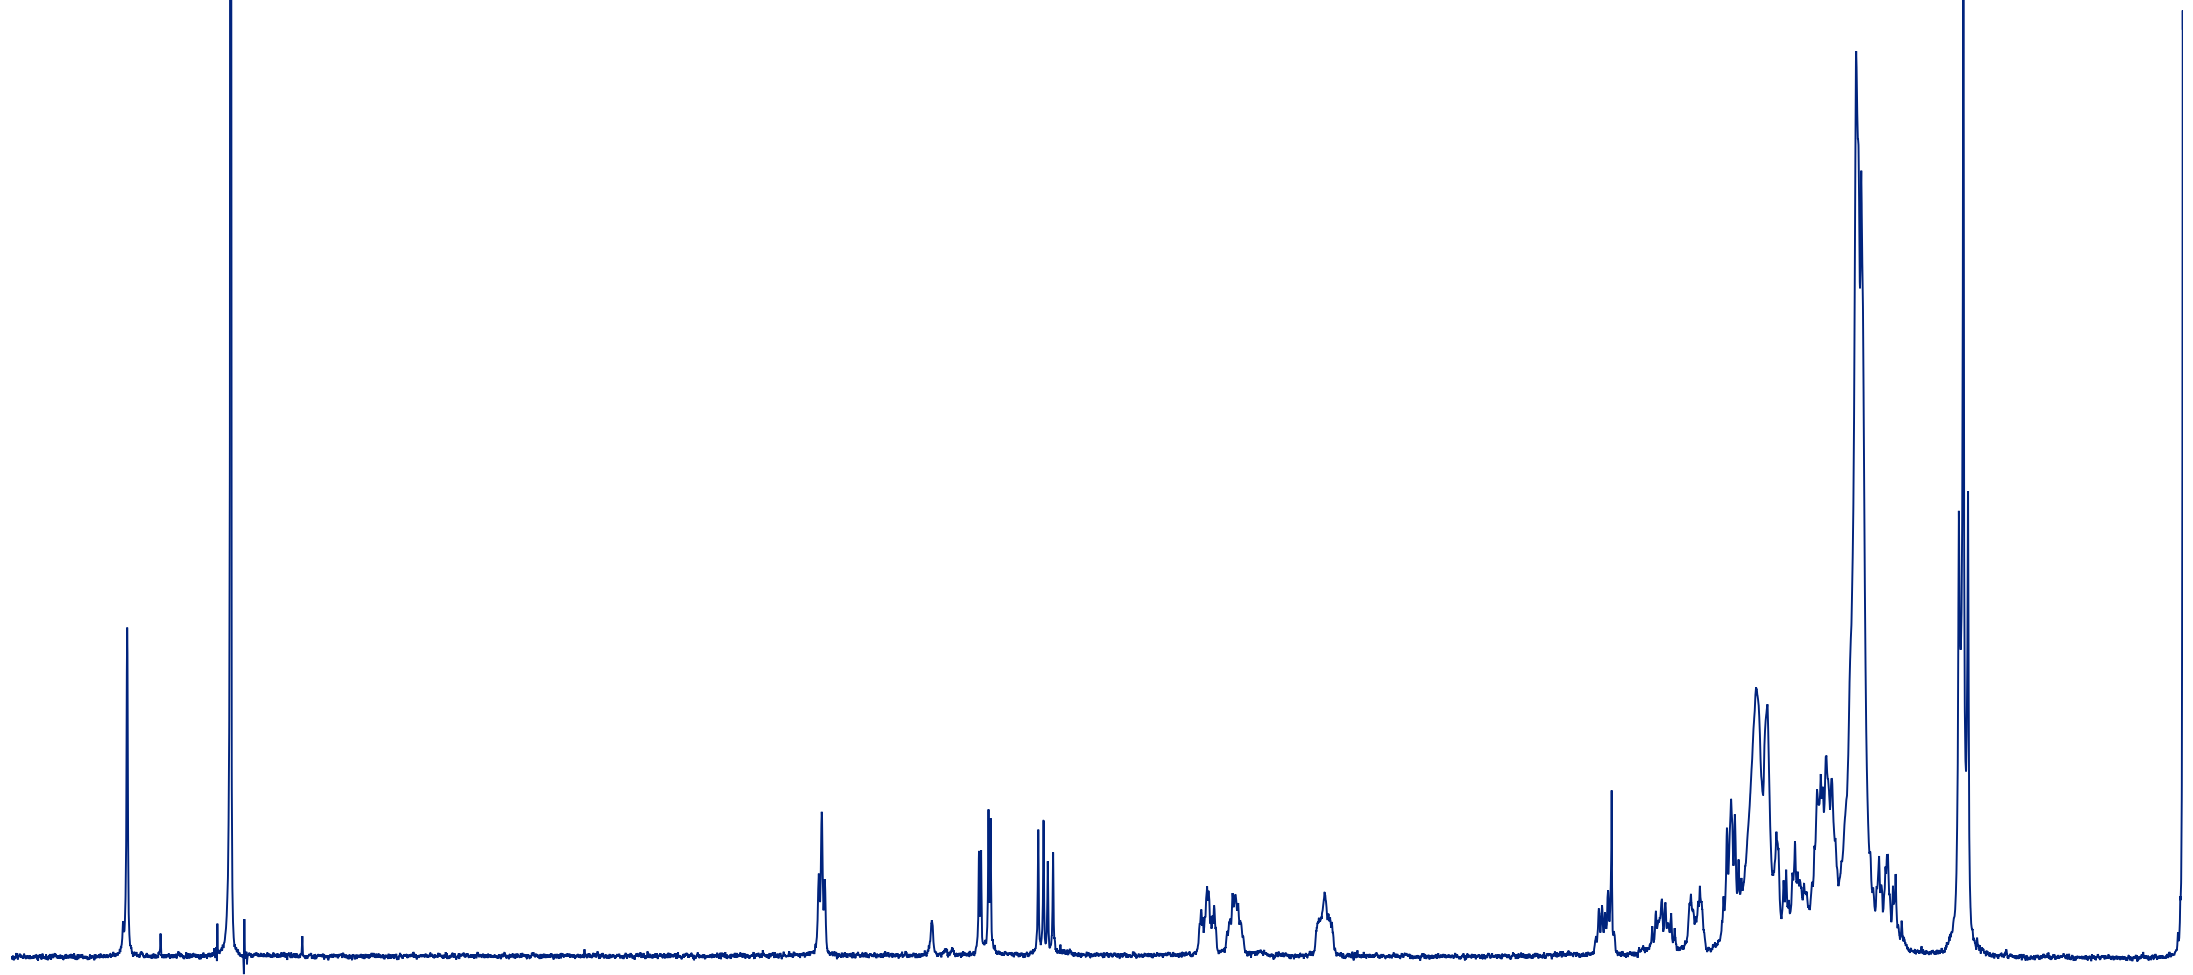

3

7

6

5

4

3

2

1

0

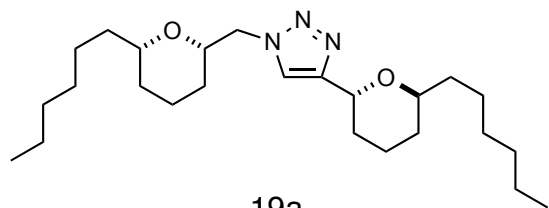

19a

$^{13}\text{C}$  NMR ( $\text{CDCl}_3$ , 125 MHz)

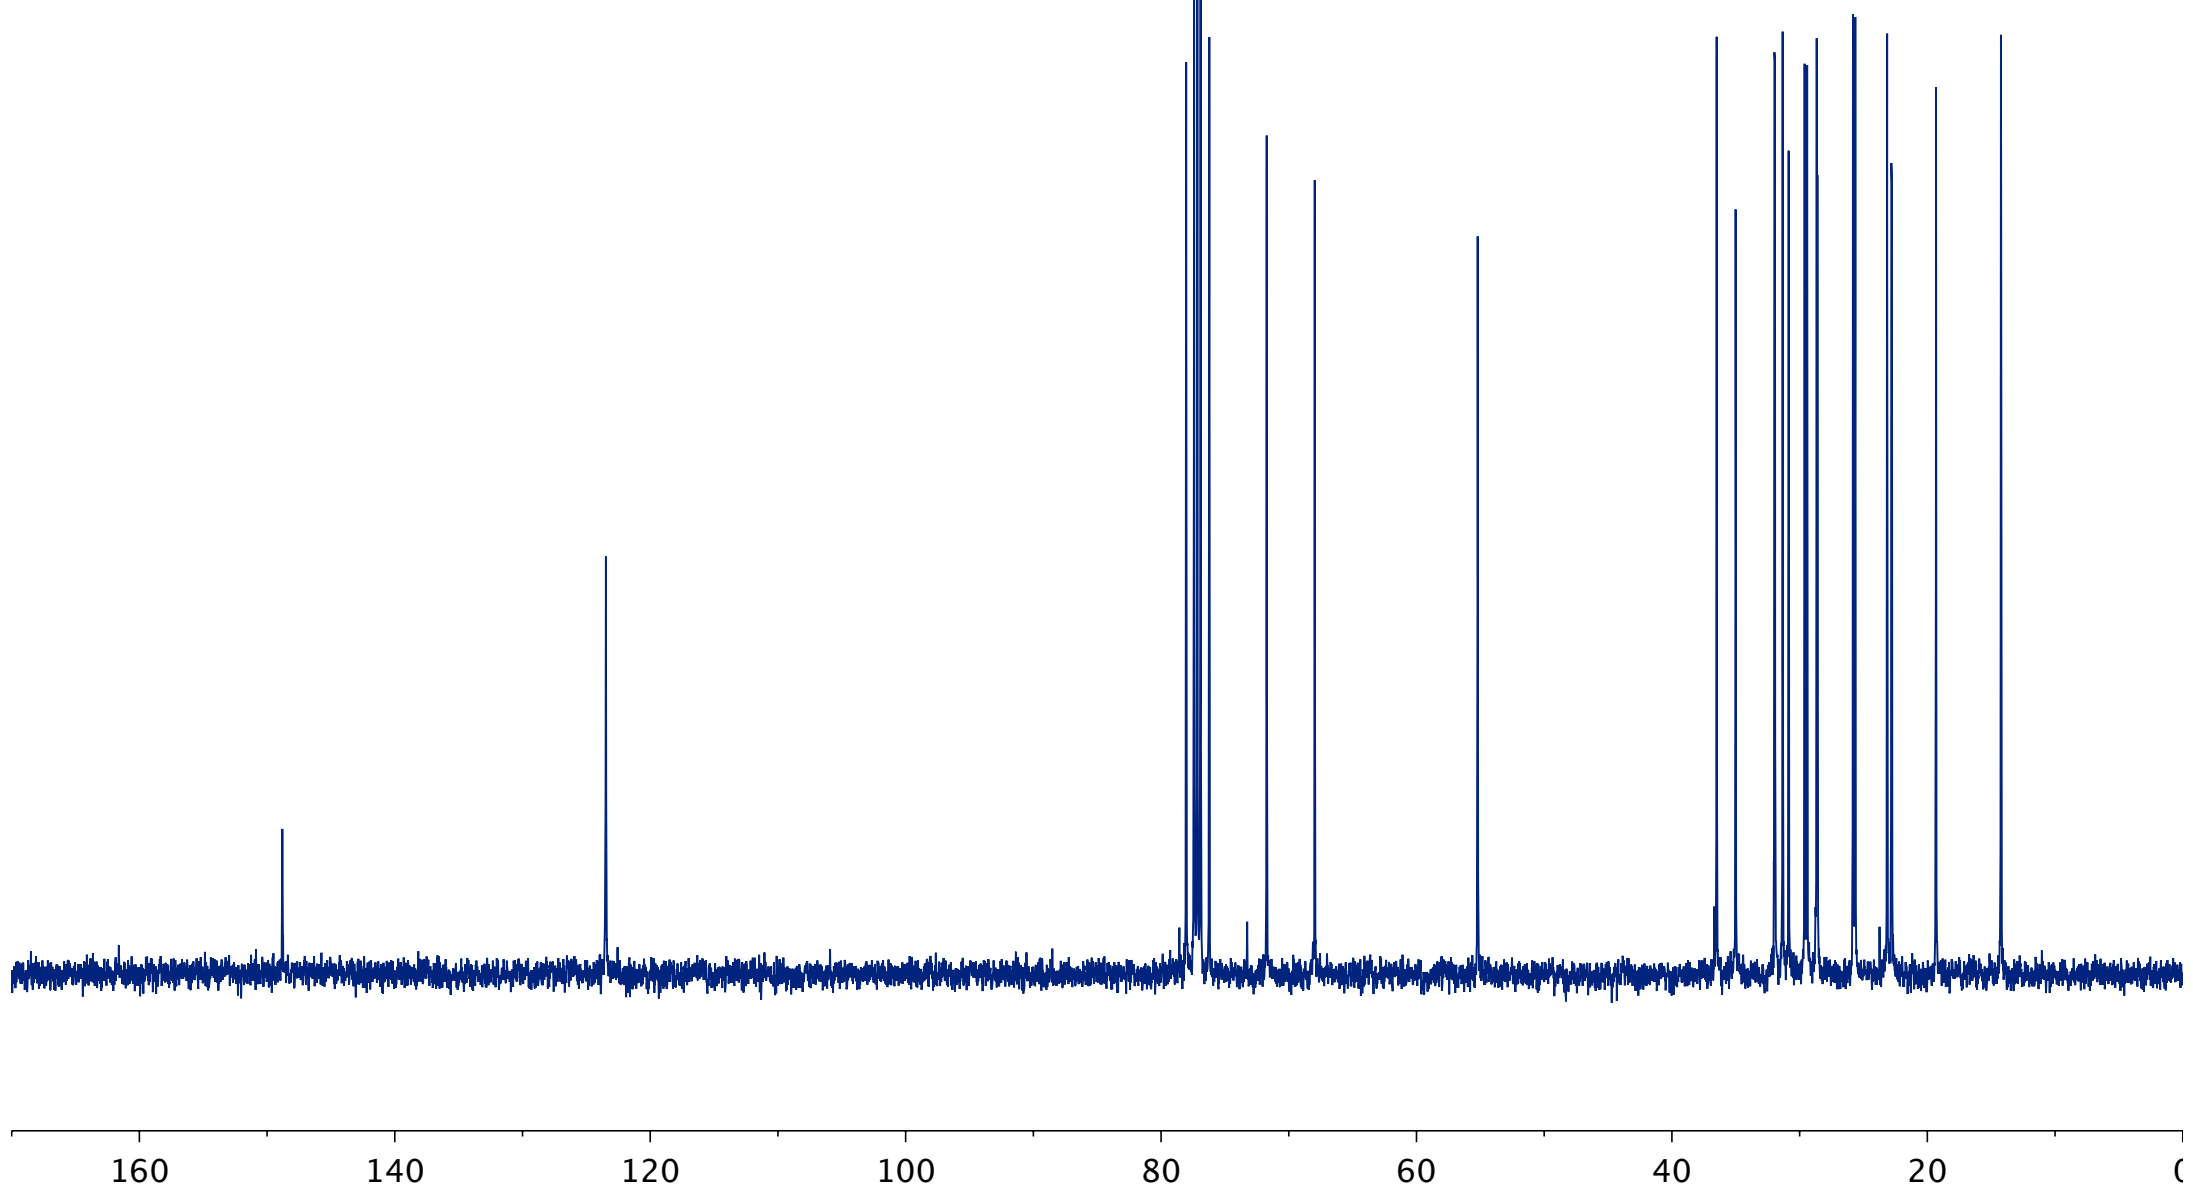



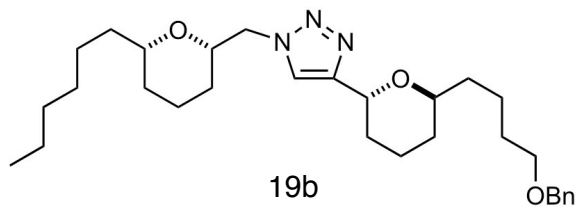

<sup>1</sup>H NMR (CDCl<sub>3</sub>, 300 MHz)

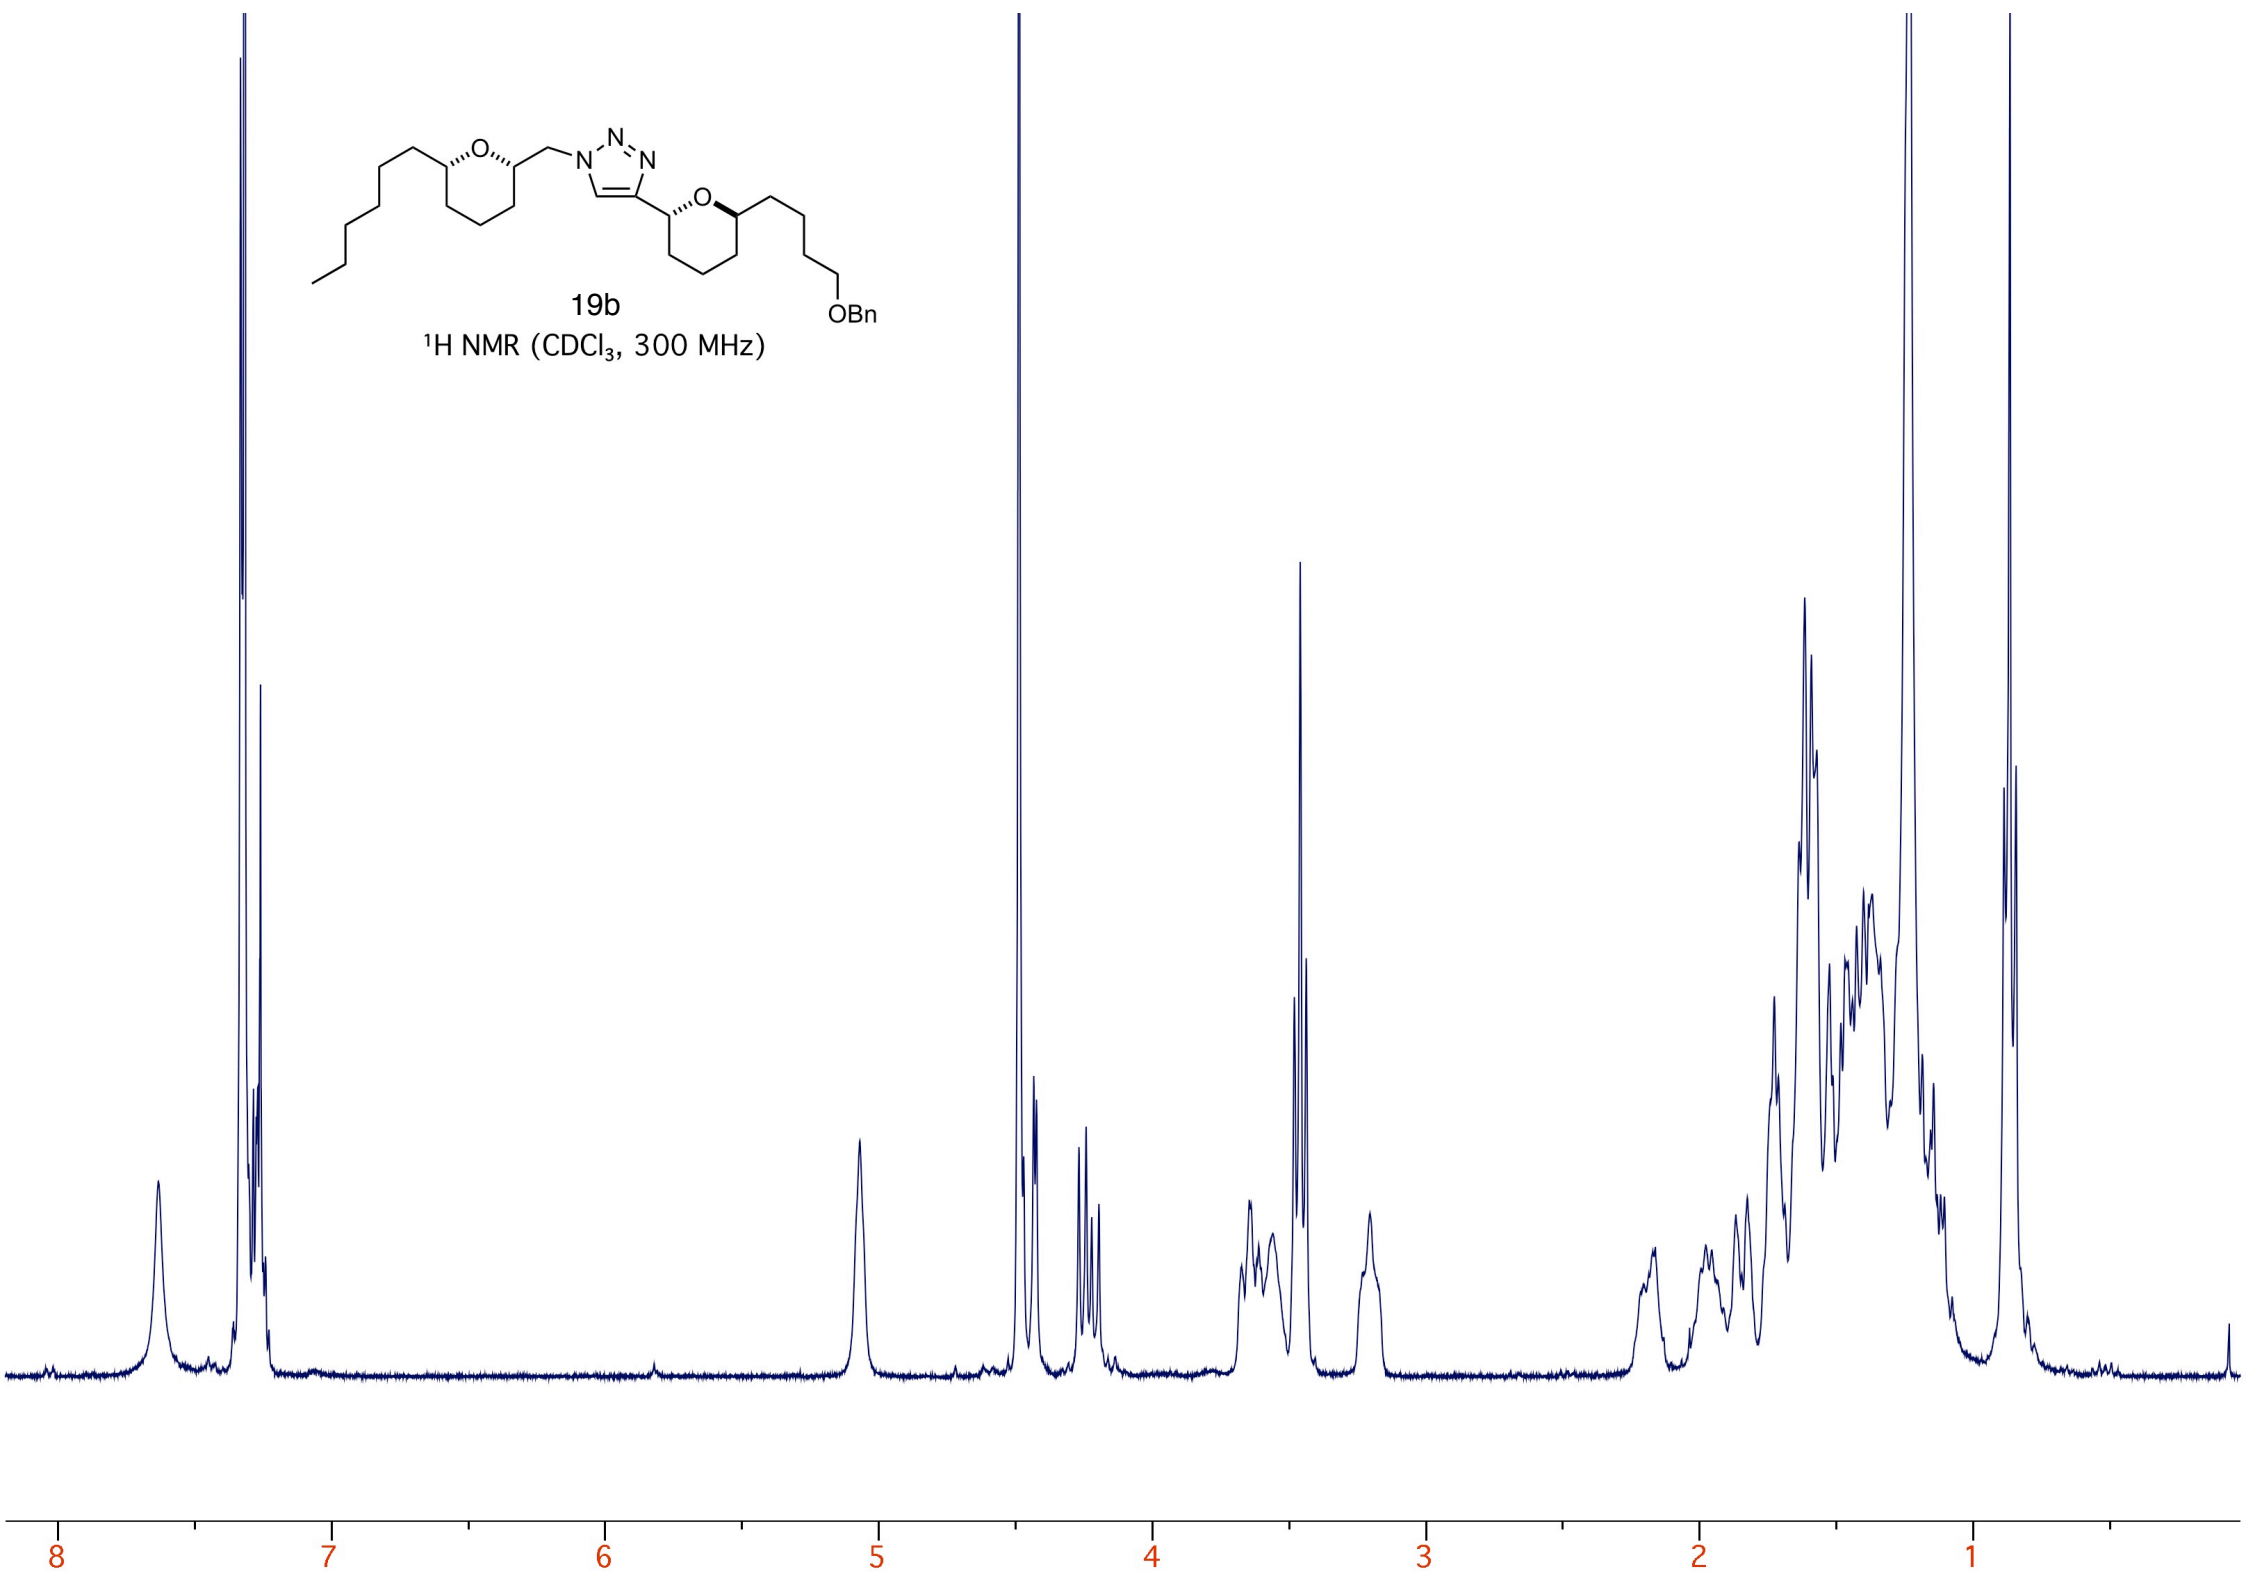

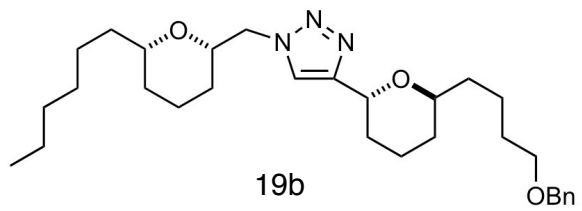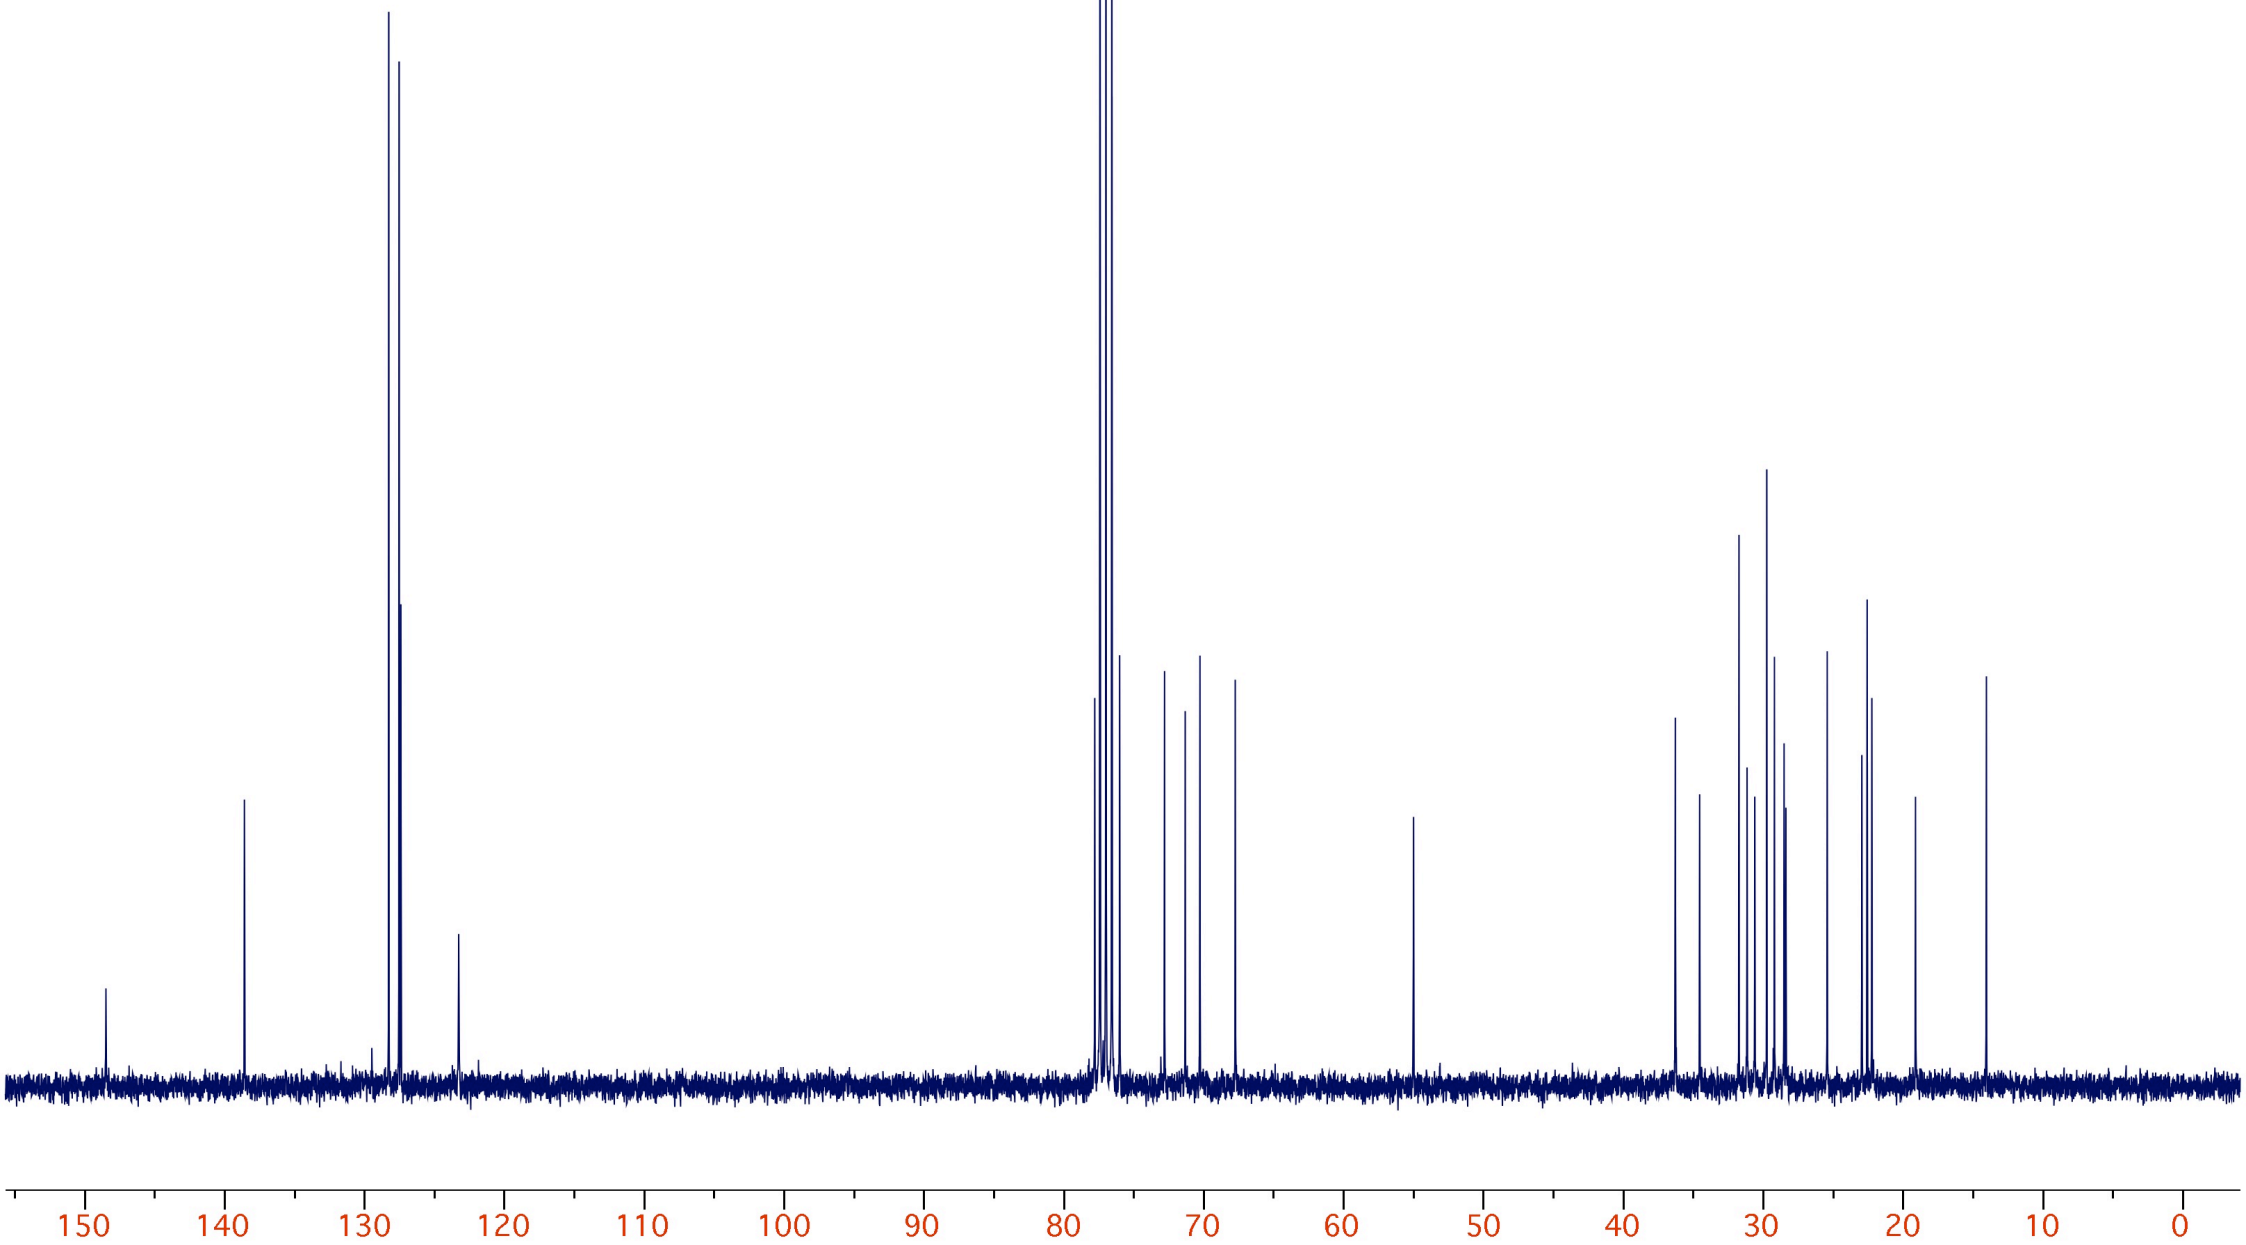

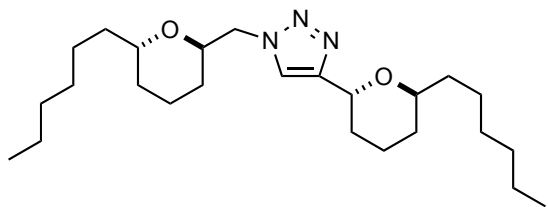

20a

$^1\text{H}$  NMR ( $\text{CDCl}_3$ , 400 MHz)

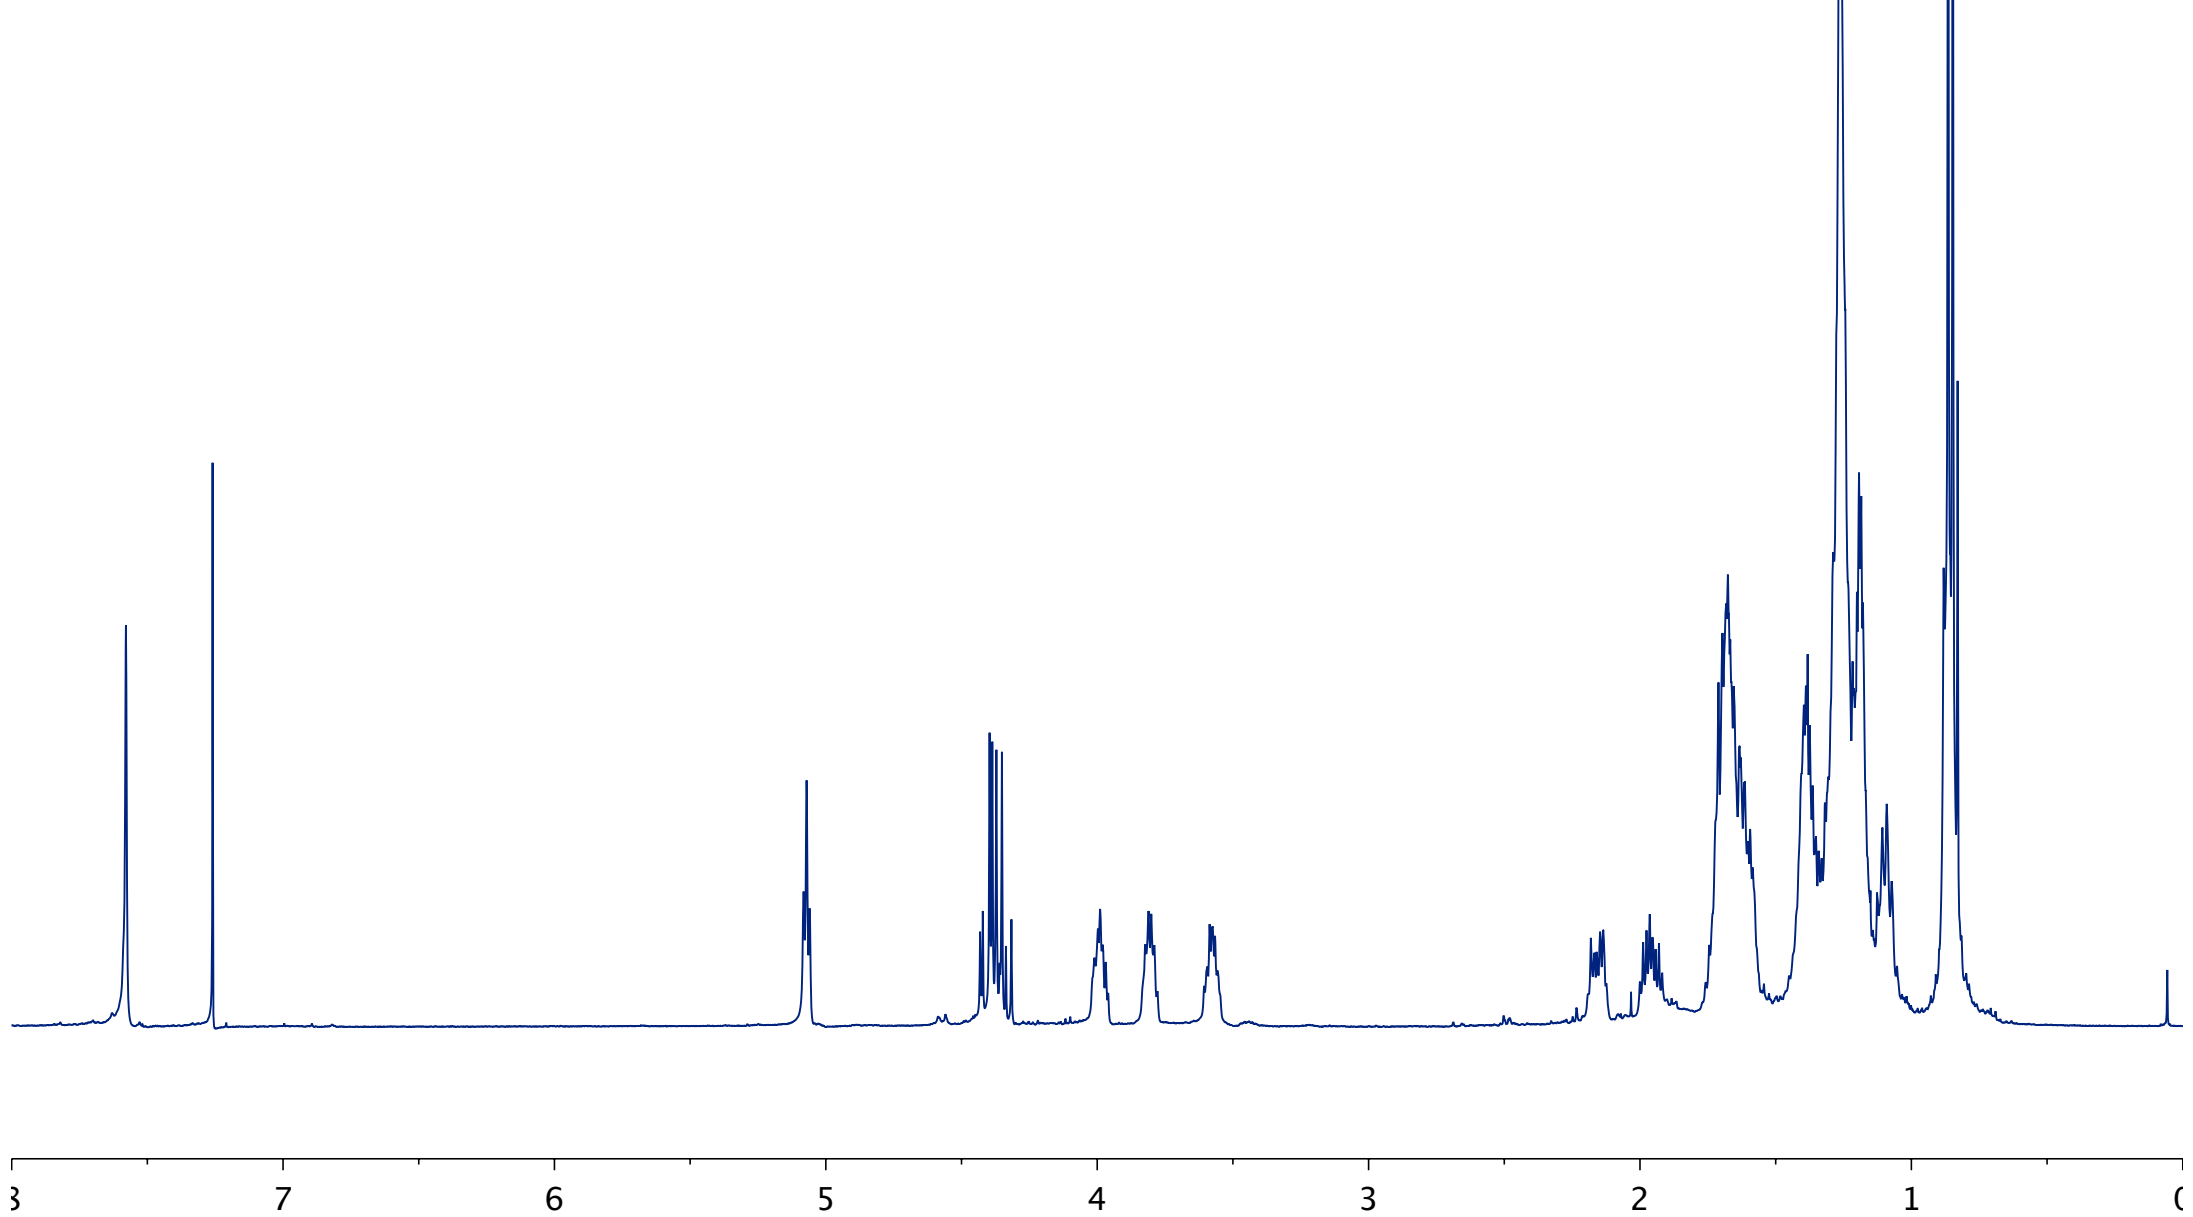

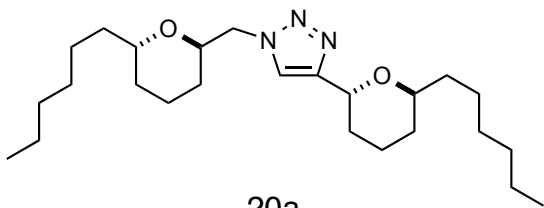

20a

$^{13}\text{C}$  NMR ( $\text{CDCl}_3$ , 125 MHz)

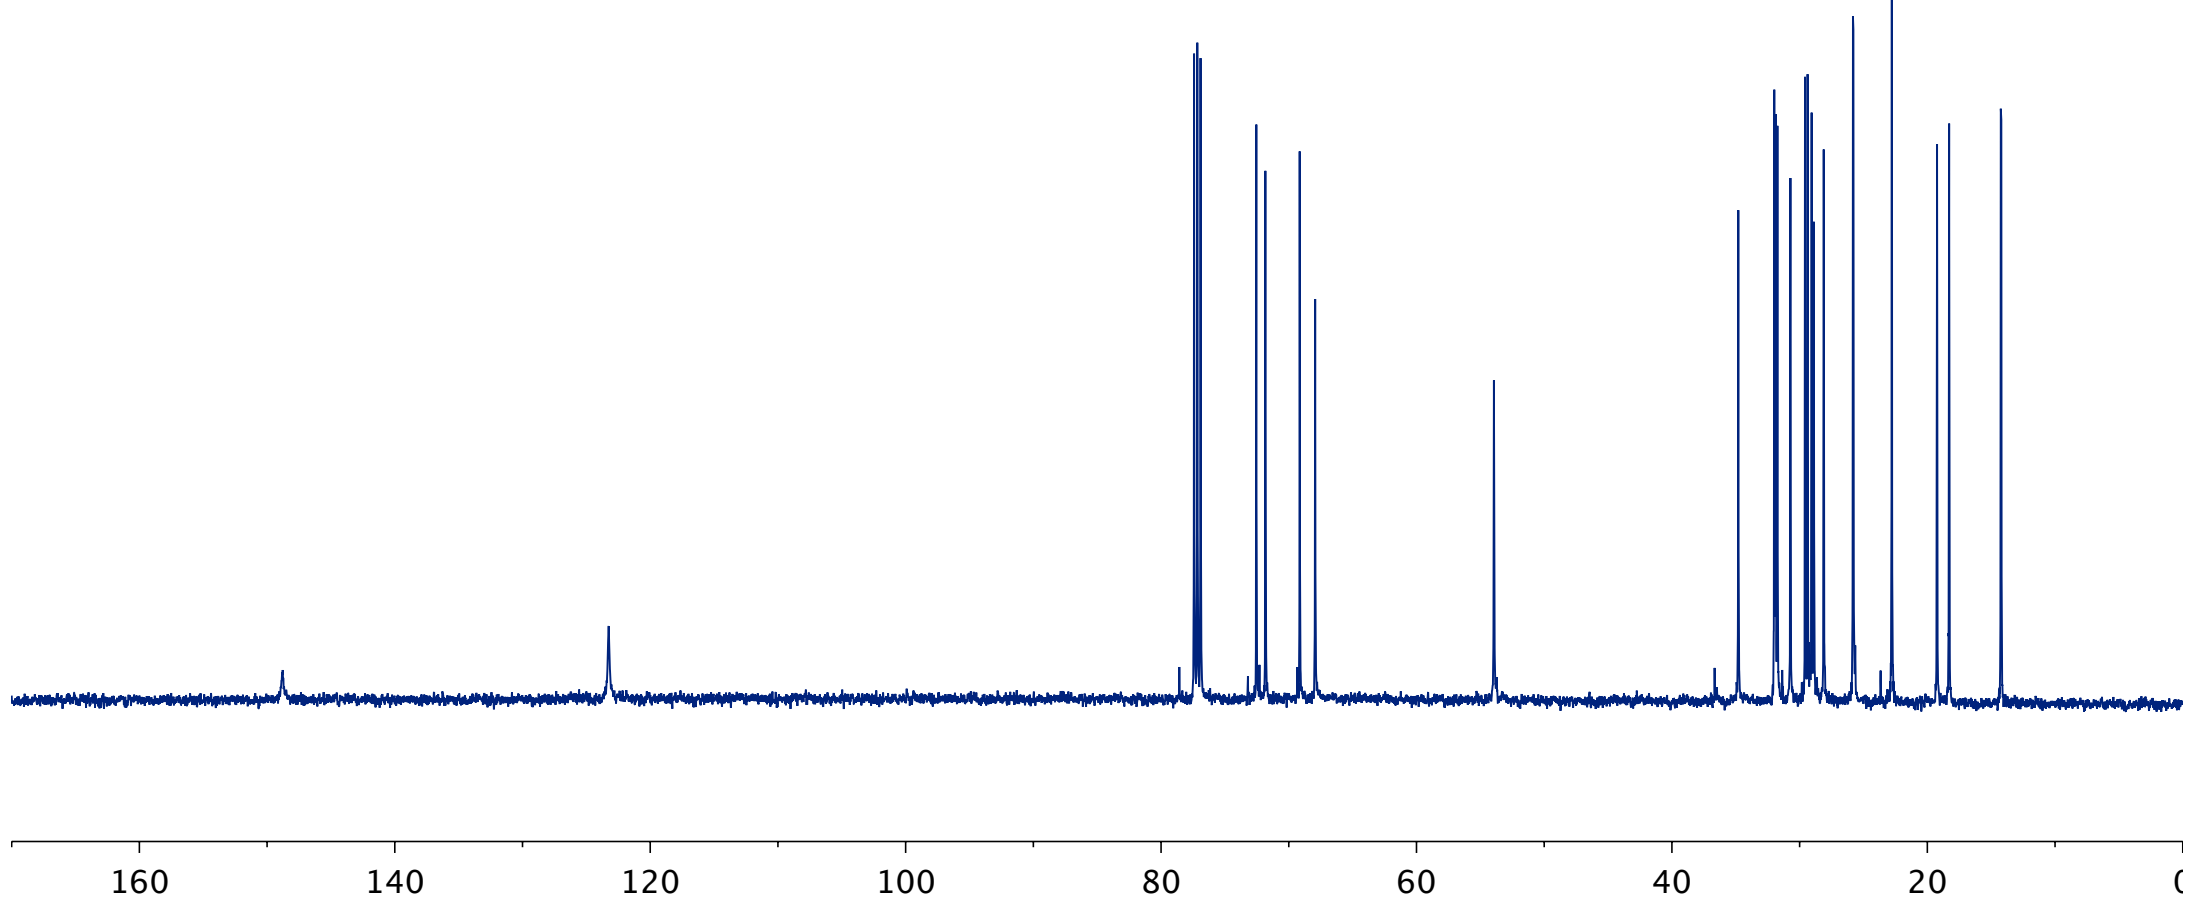

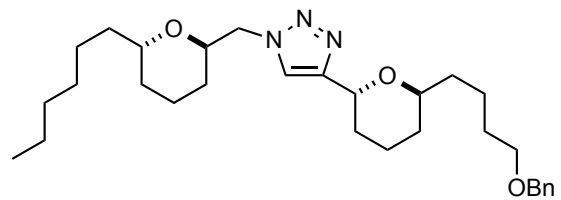

20b  
<sup>1</sup>H NMR (CDCl<sub>3</sub>, 300 MHz)

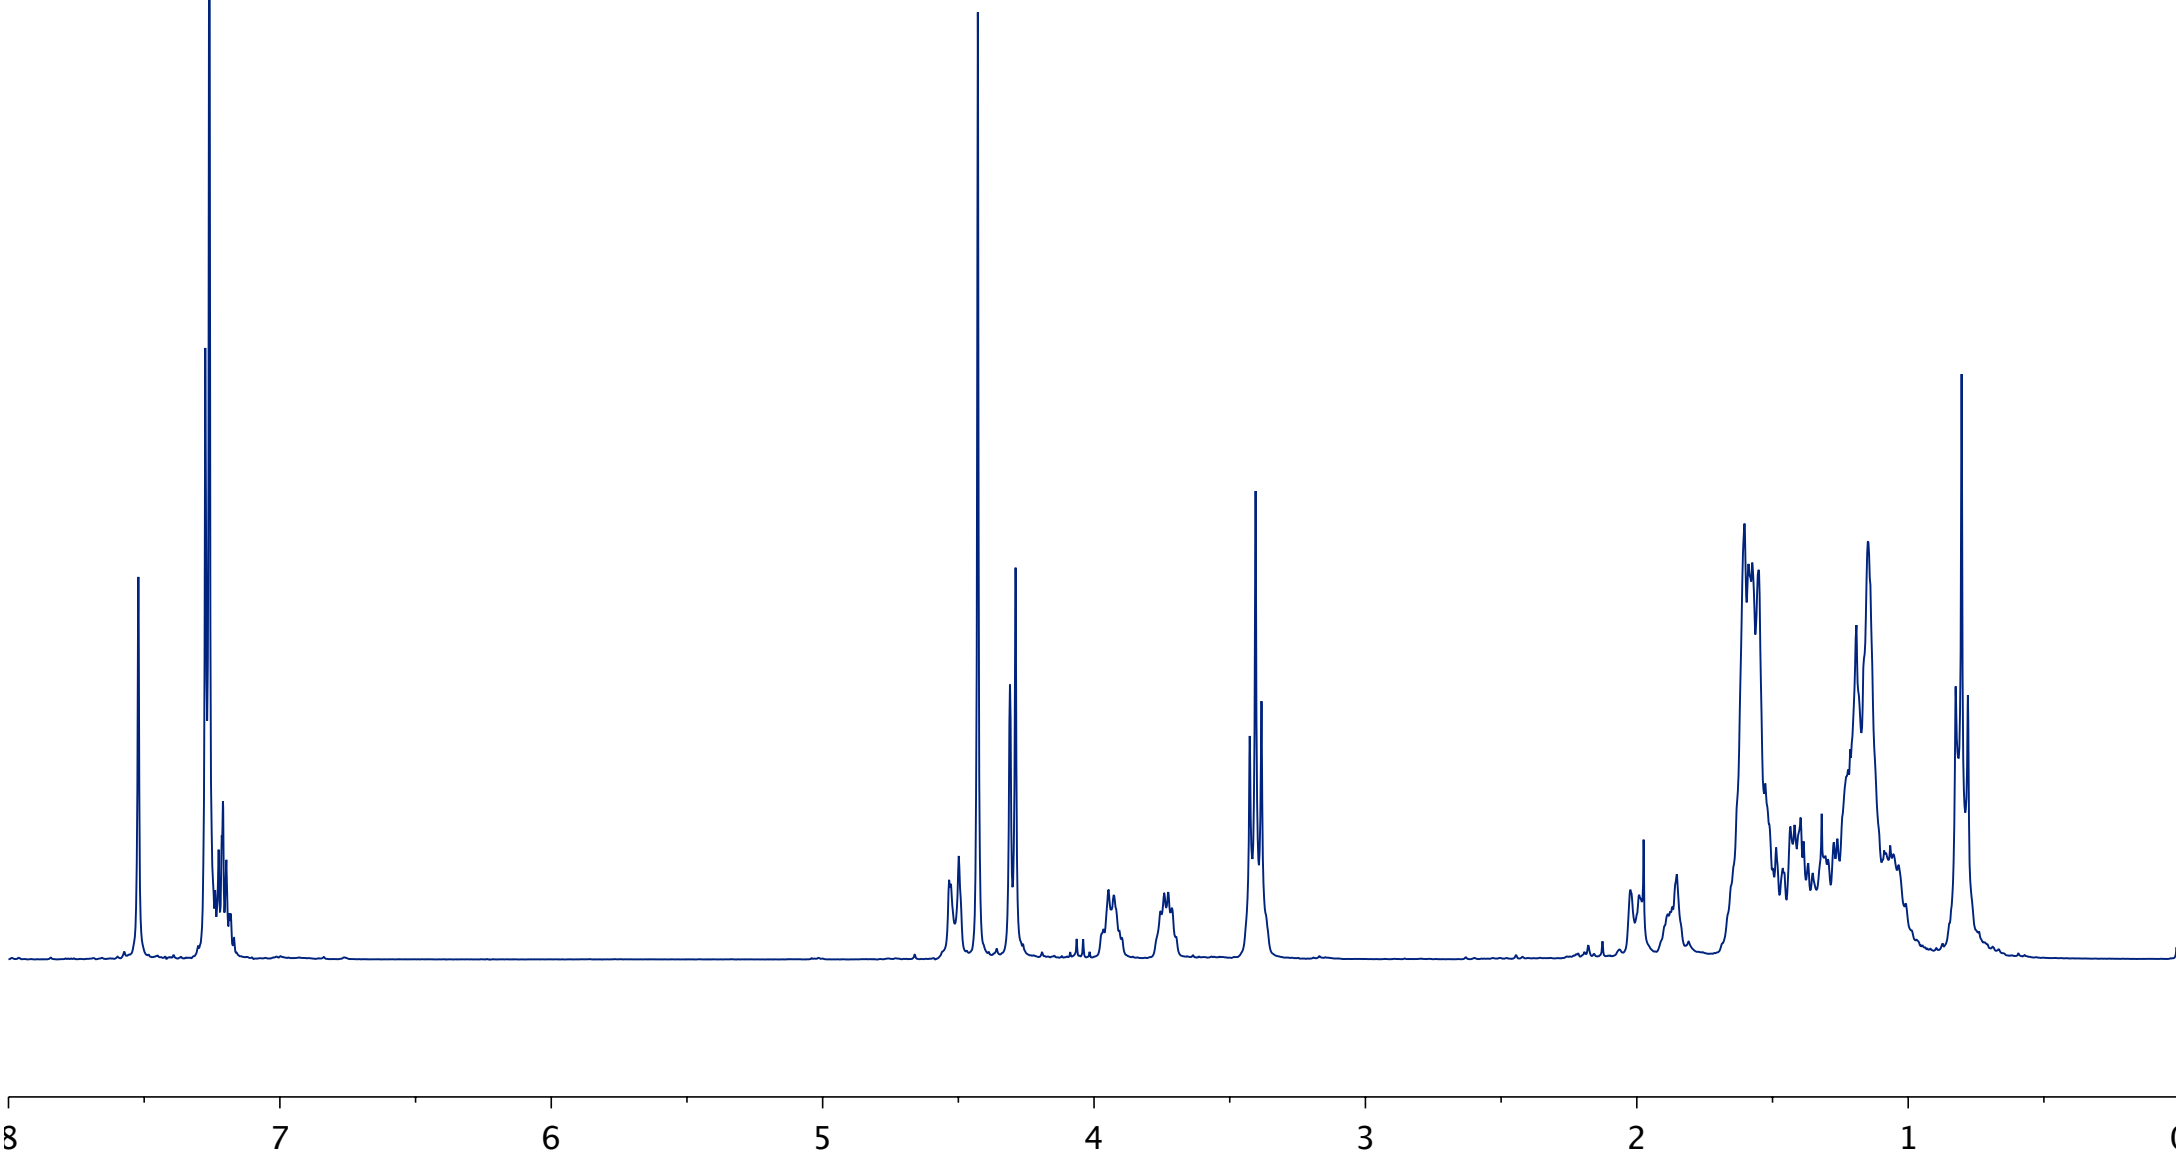

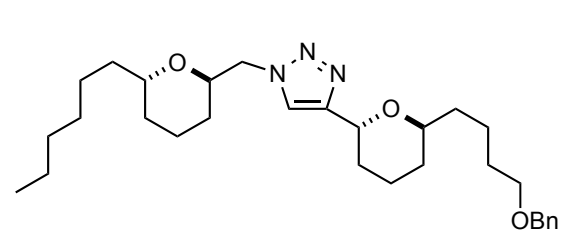

20b  
<sup>13</sup>C NMR (CDCl<sub>3</sub>, 75 MHz)

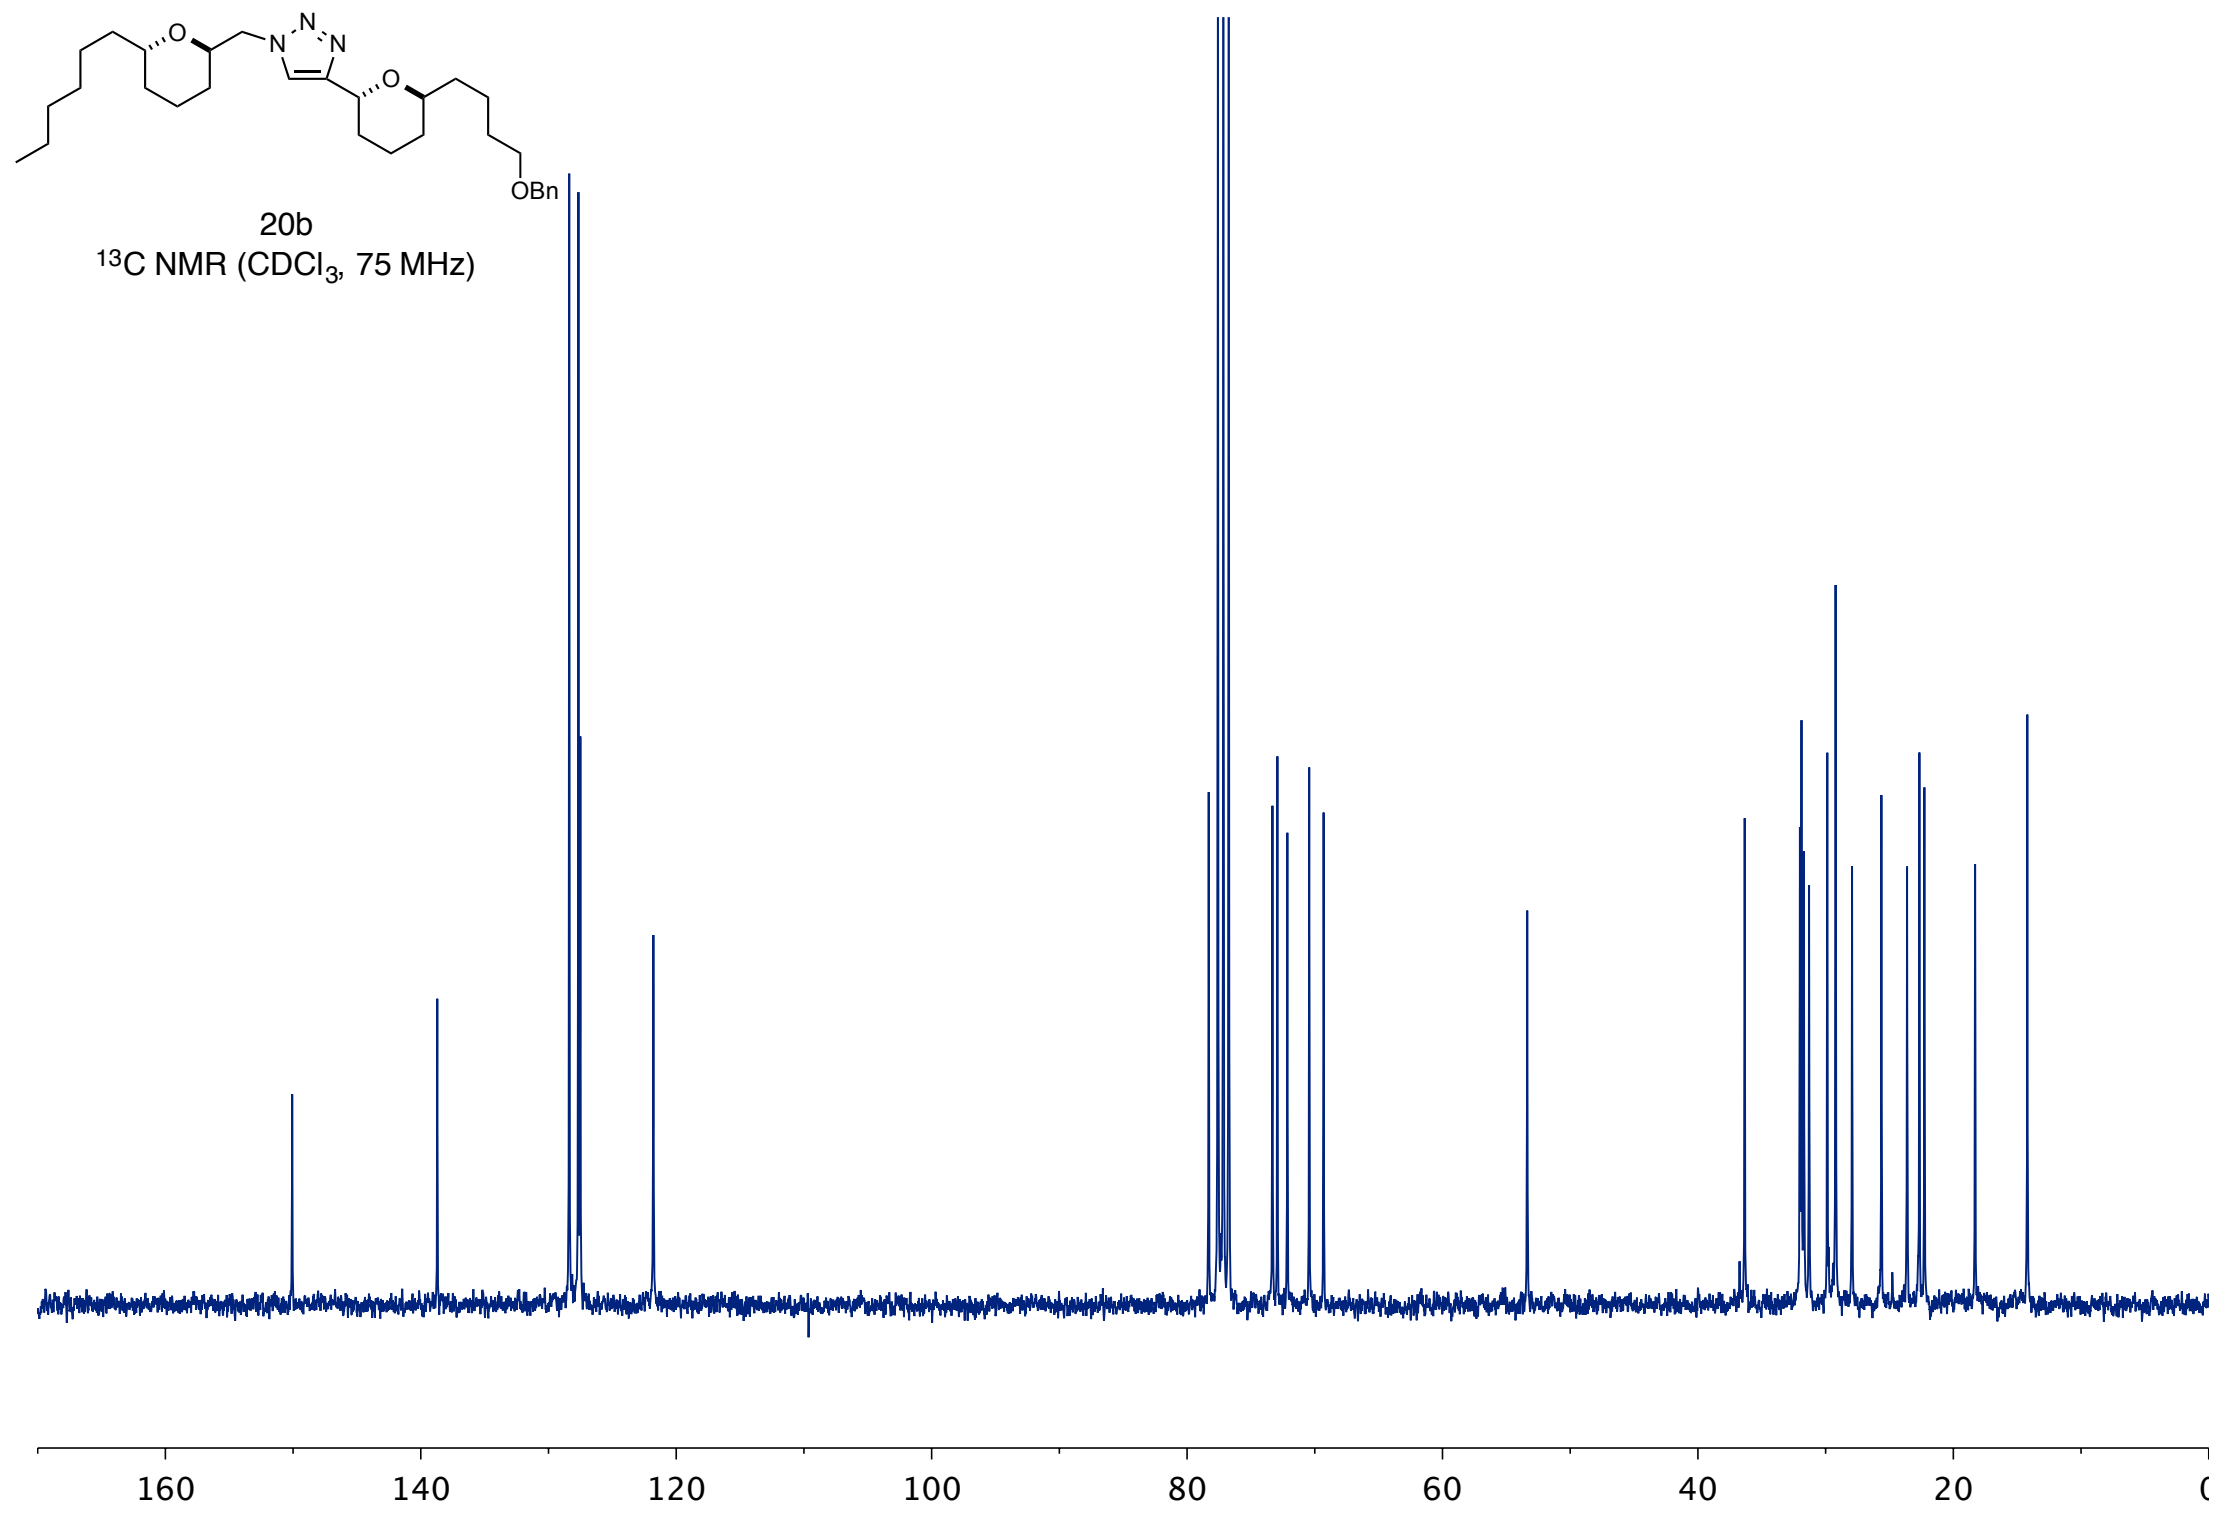

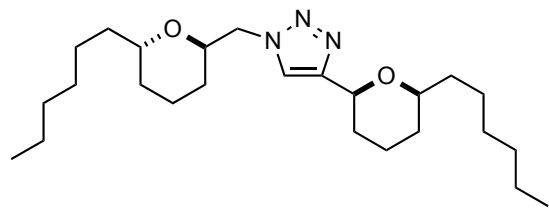

21a  
 $^1\text{H}$  NMR ( $\text{CDCl}_3$ , 500 MHz)

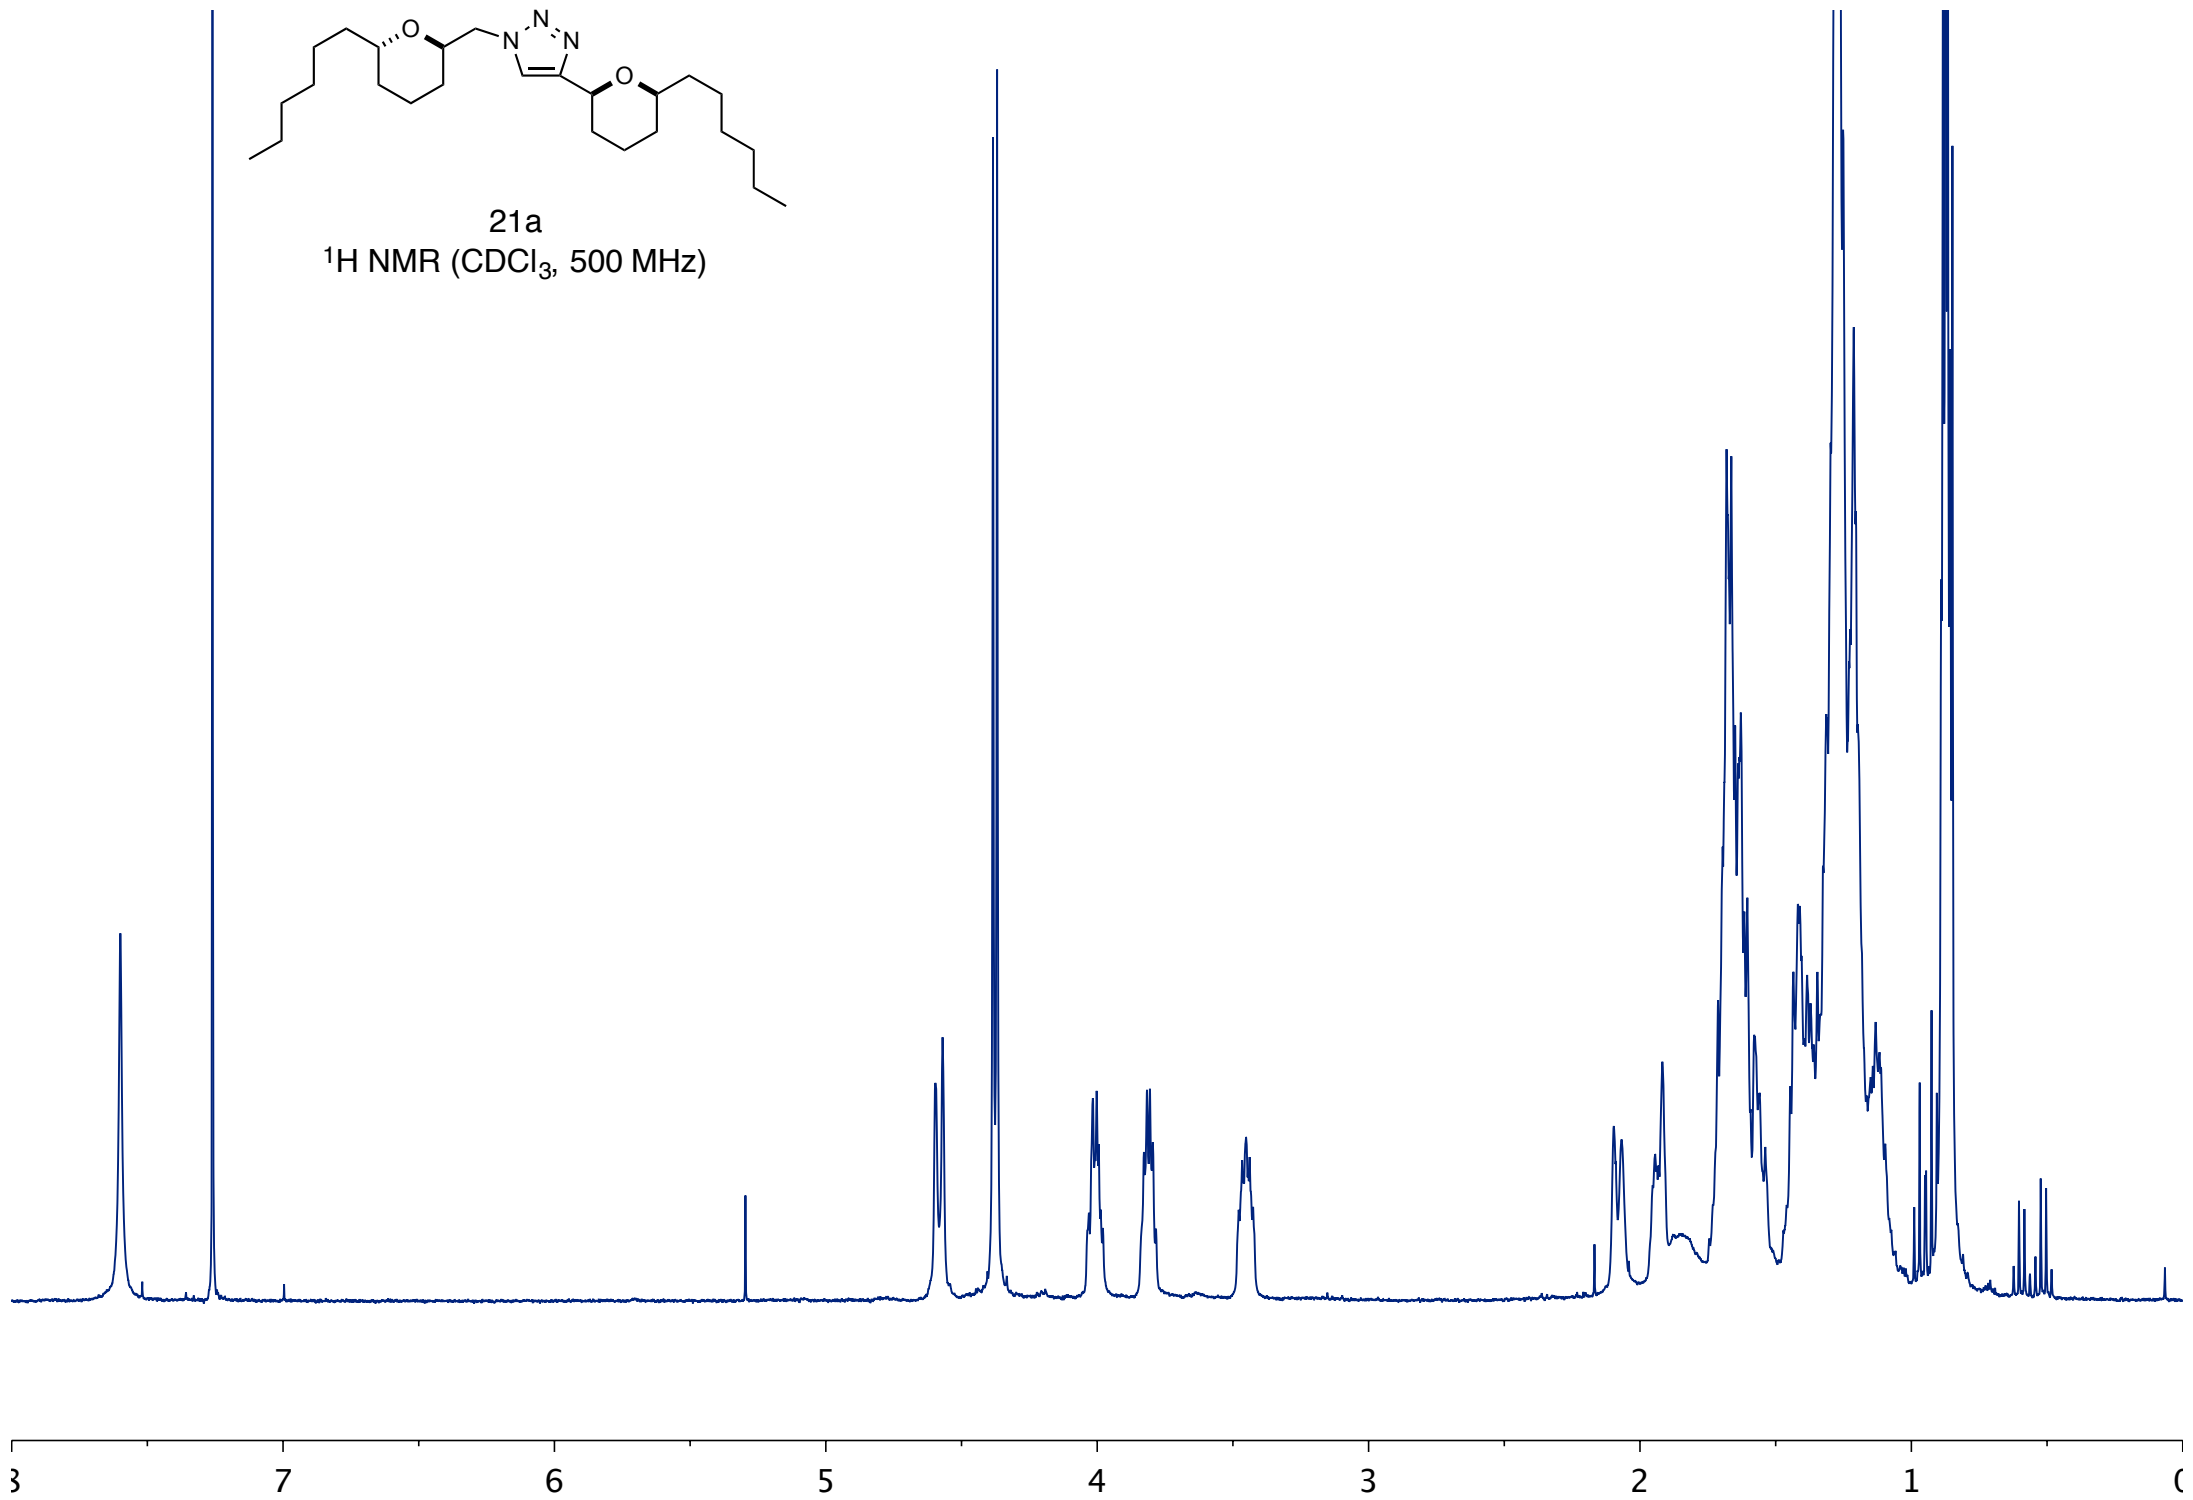

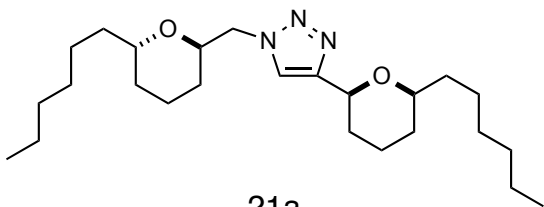

21a

$^{13}\text{C}$  NMR ( $\text{CDCl}_3$ , 125 MHz)

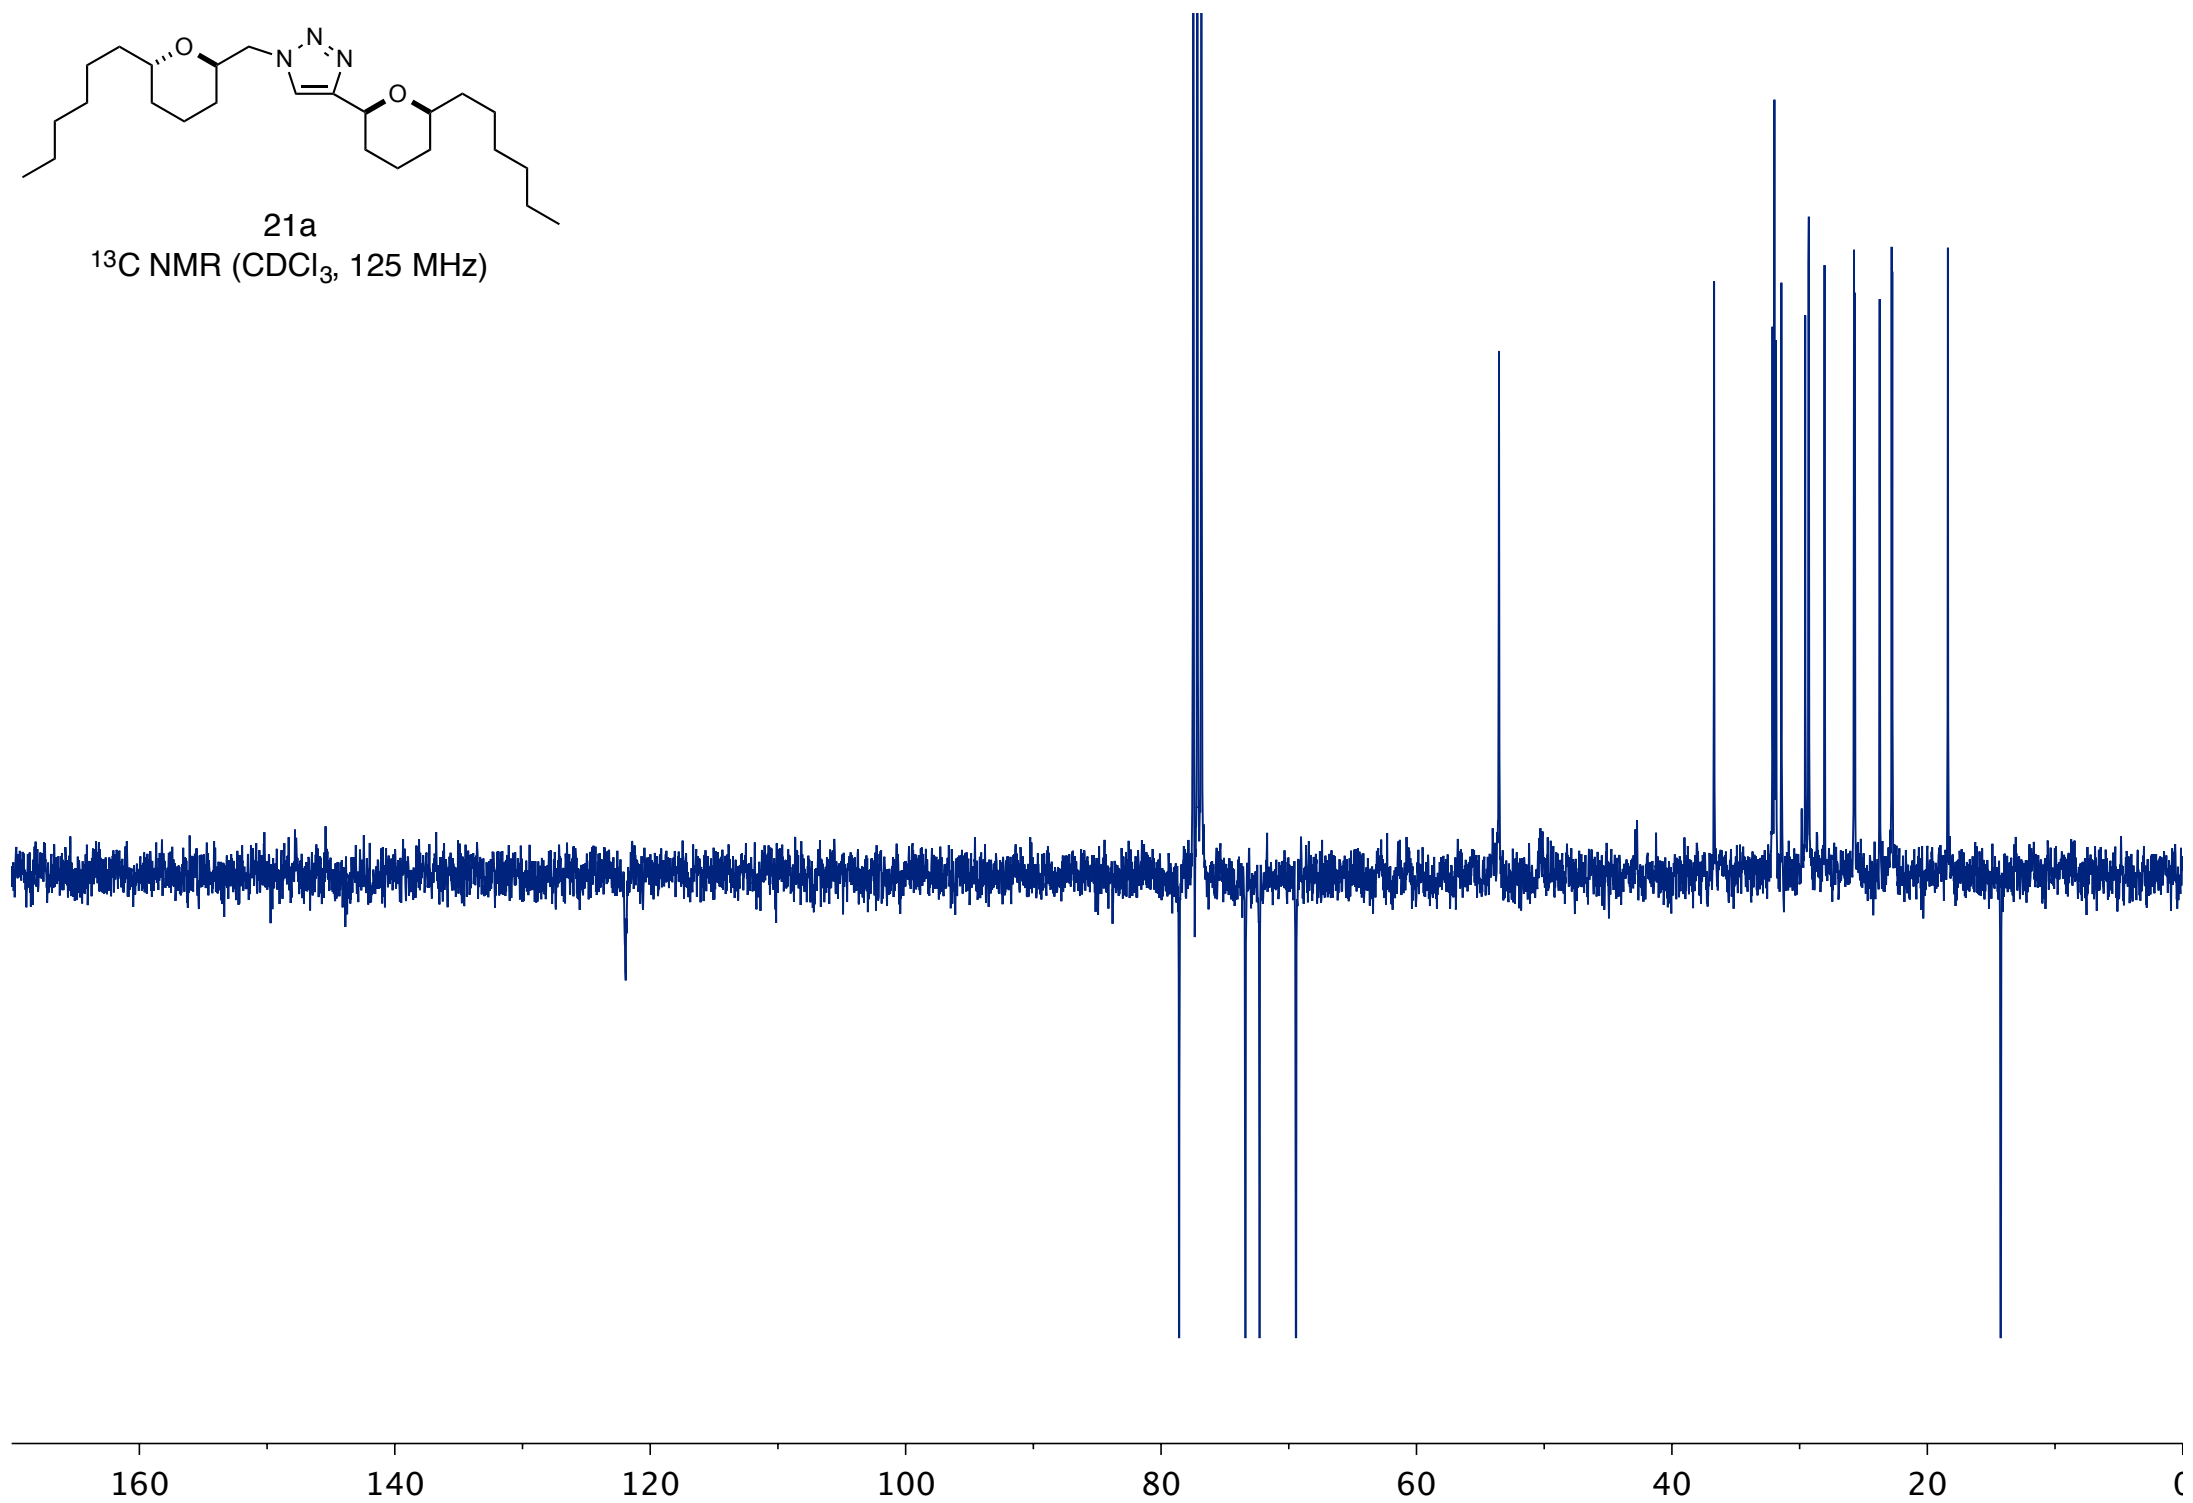



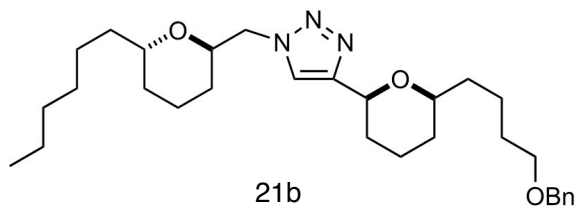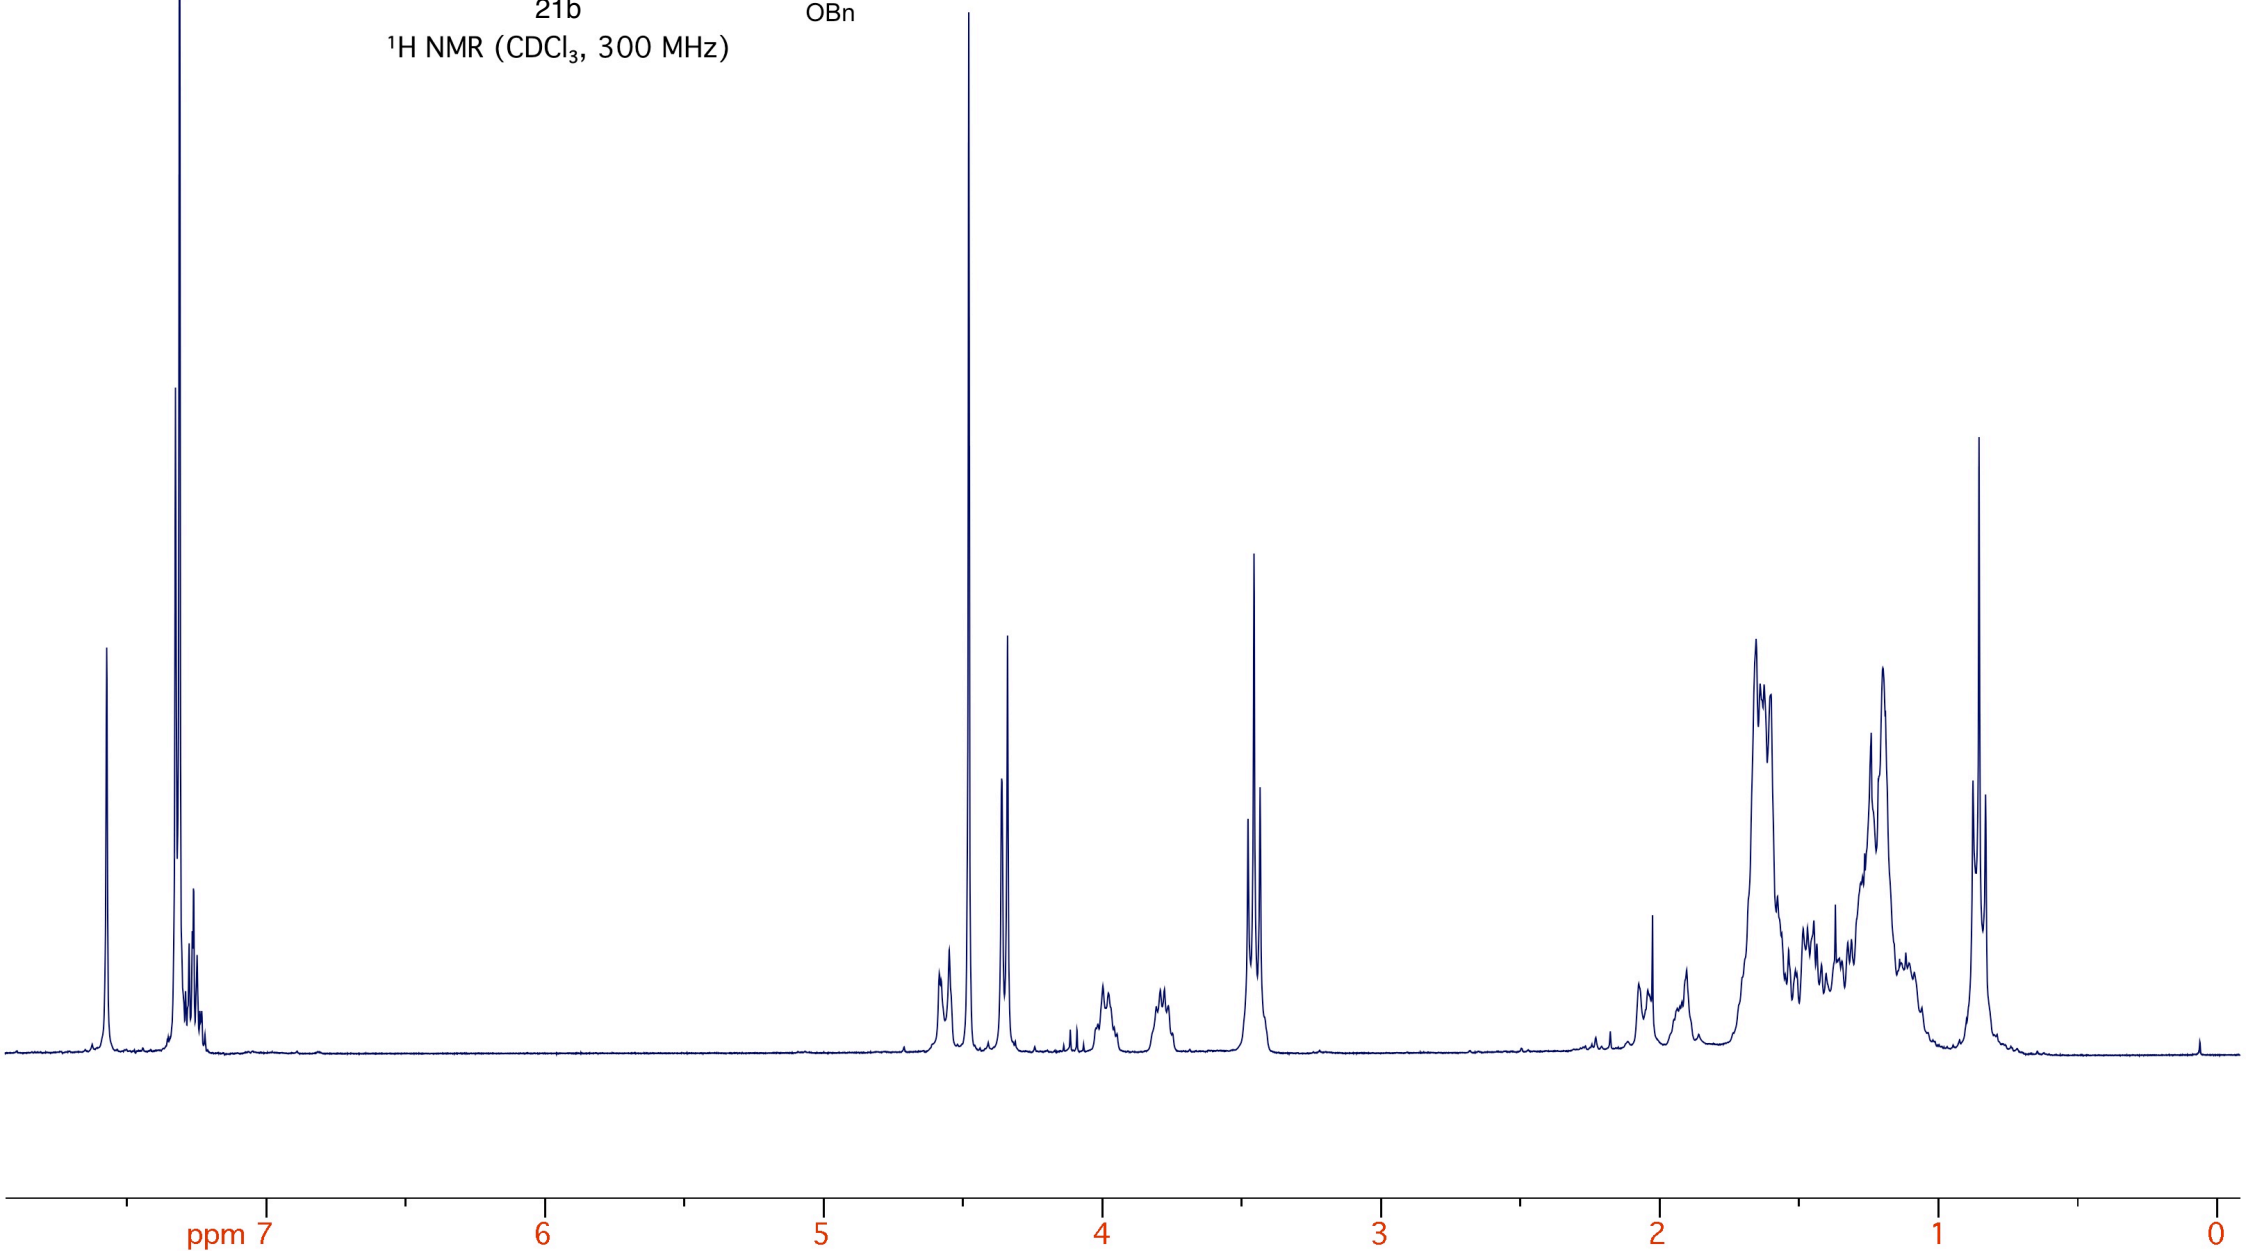

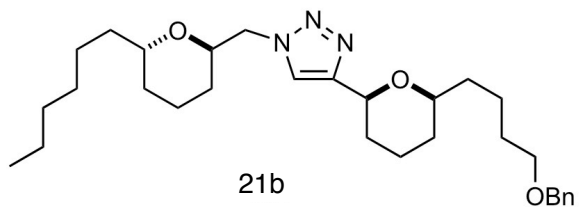

<sup>13</sup>C NMR (CDCl<sub>3</sub>, 75 MHz)

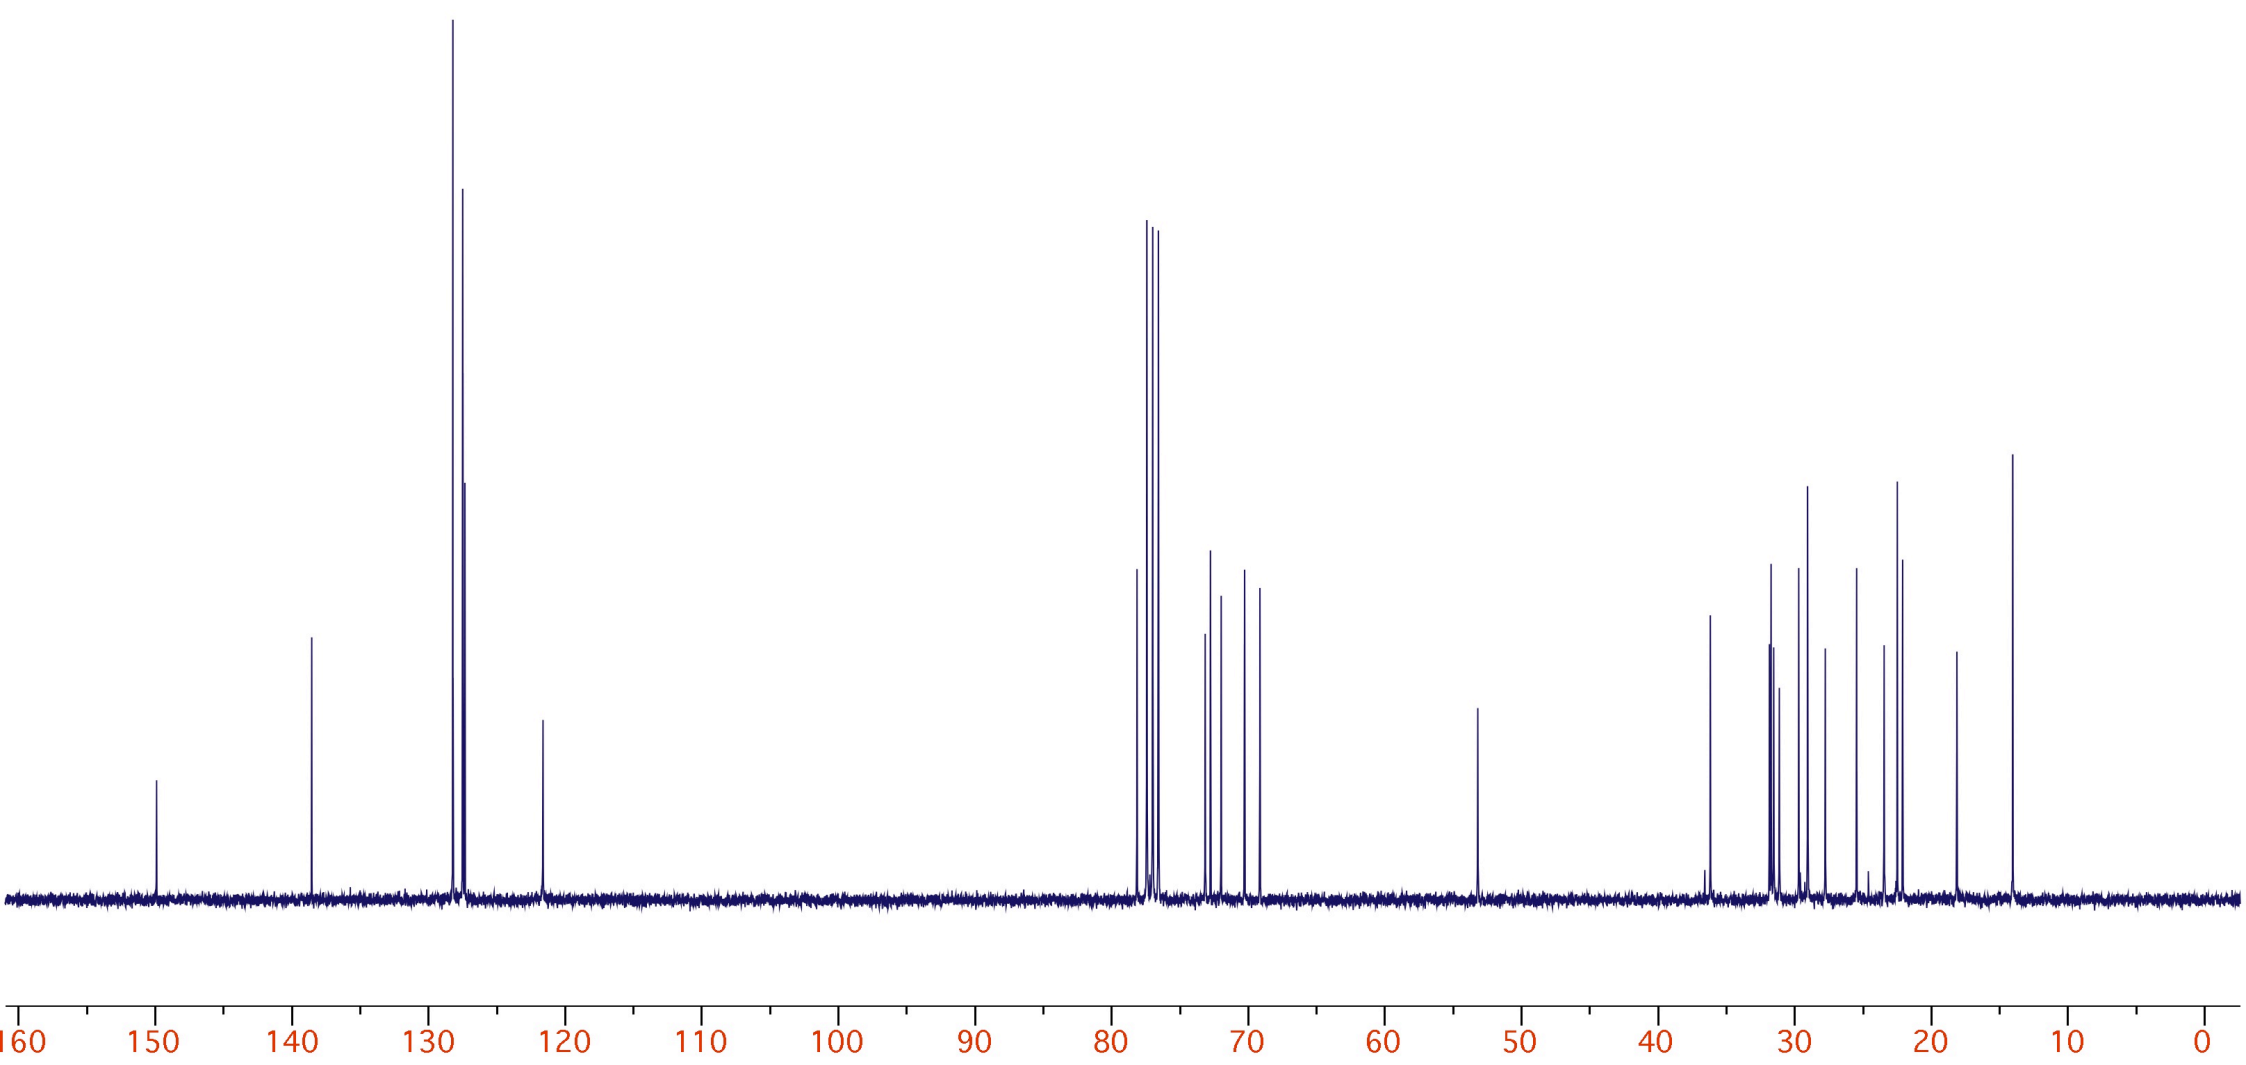

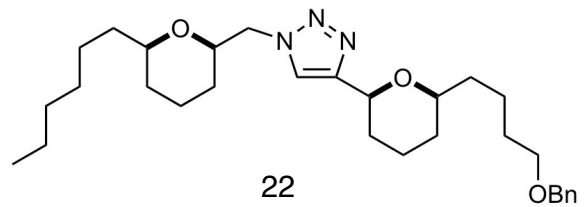

$^1\text{H NMR}$  ( $\text{CDCl}_3$ , 300 MHz)

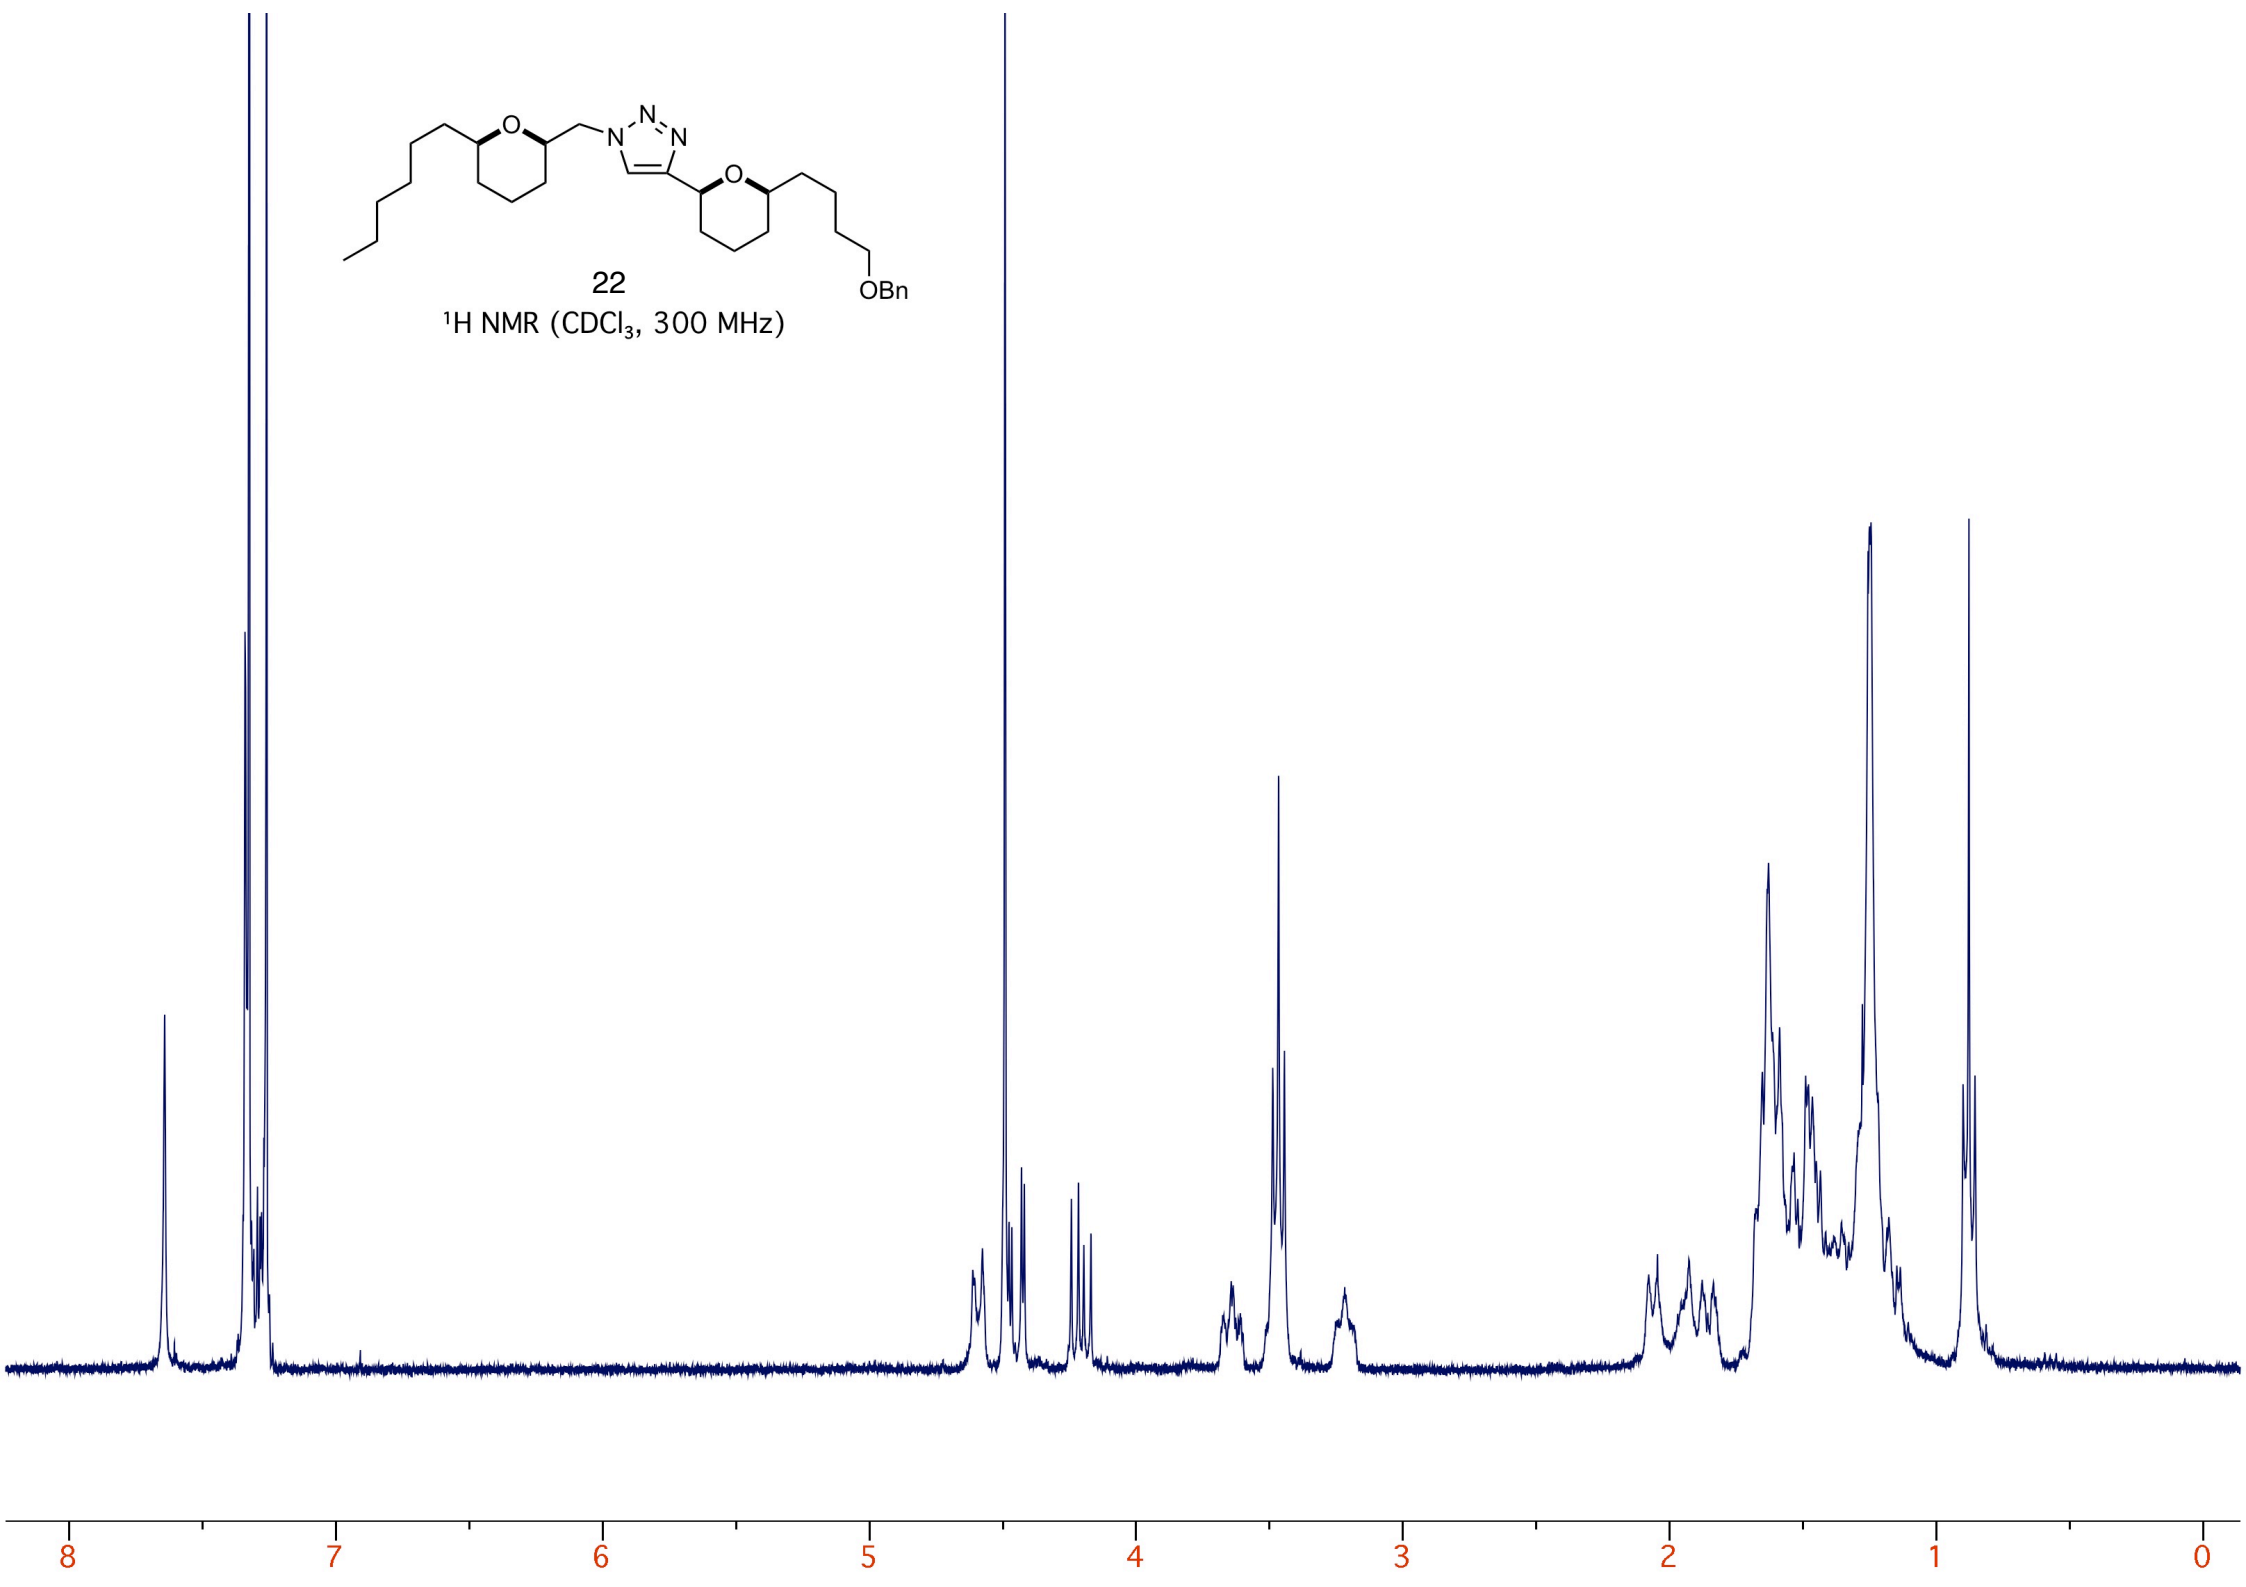

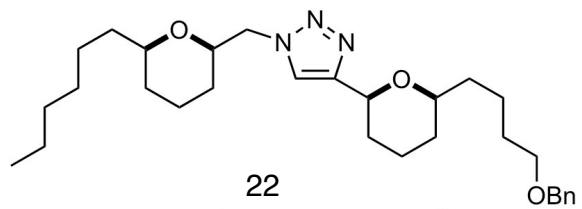

$^{13}\text{C}$  NMR ( $\text{CDCl}_3$ , 125 MHz)

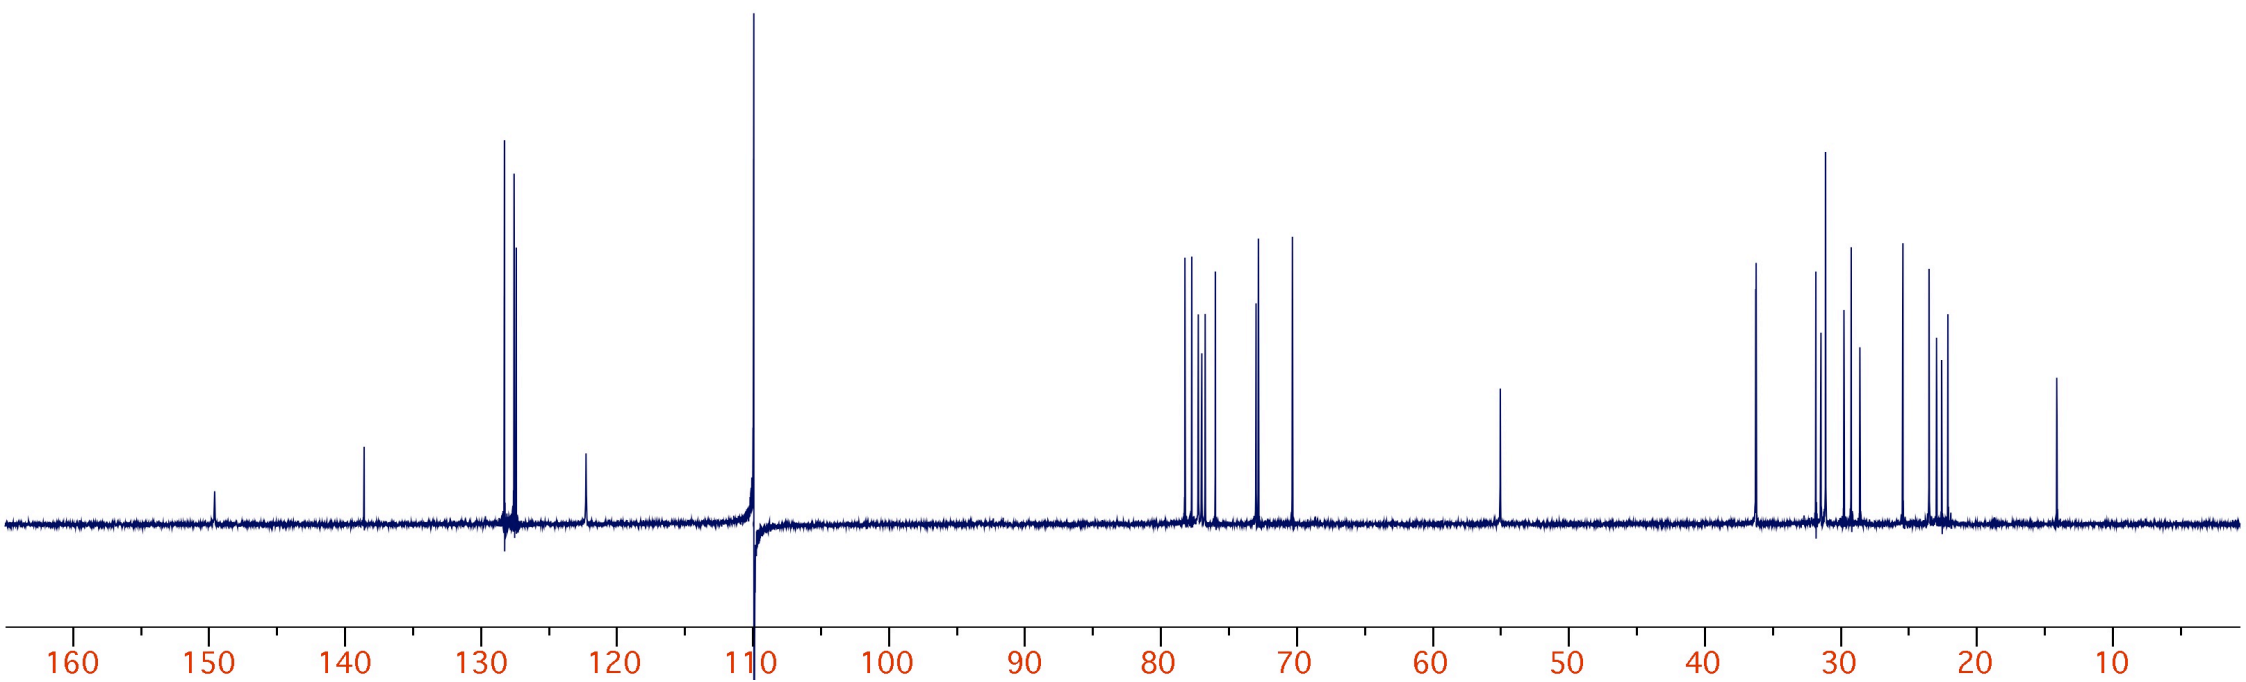

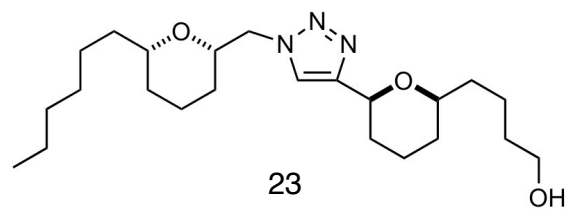

$^1\text{H}$  NMR ( $\text{CDCl}_3$ , 300 MHz)

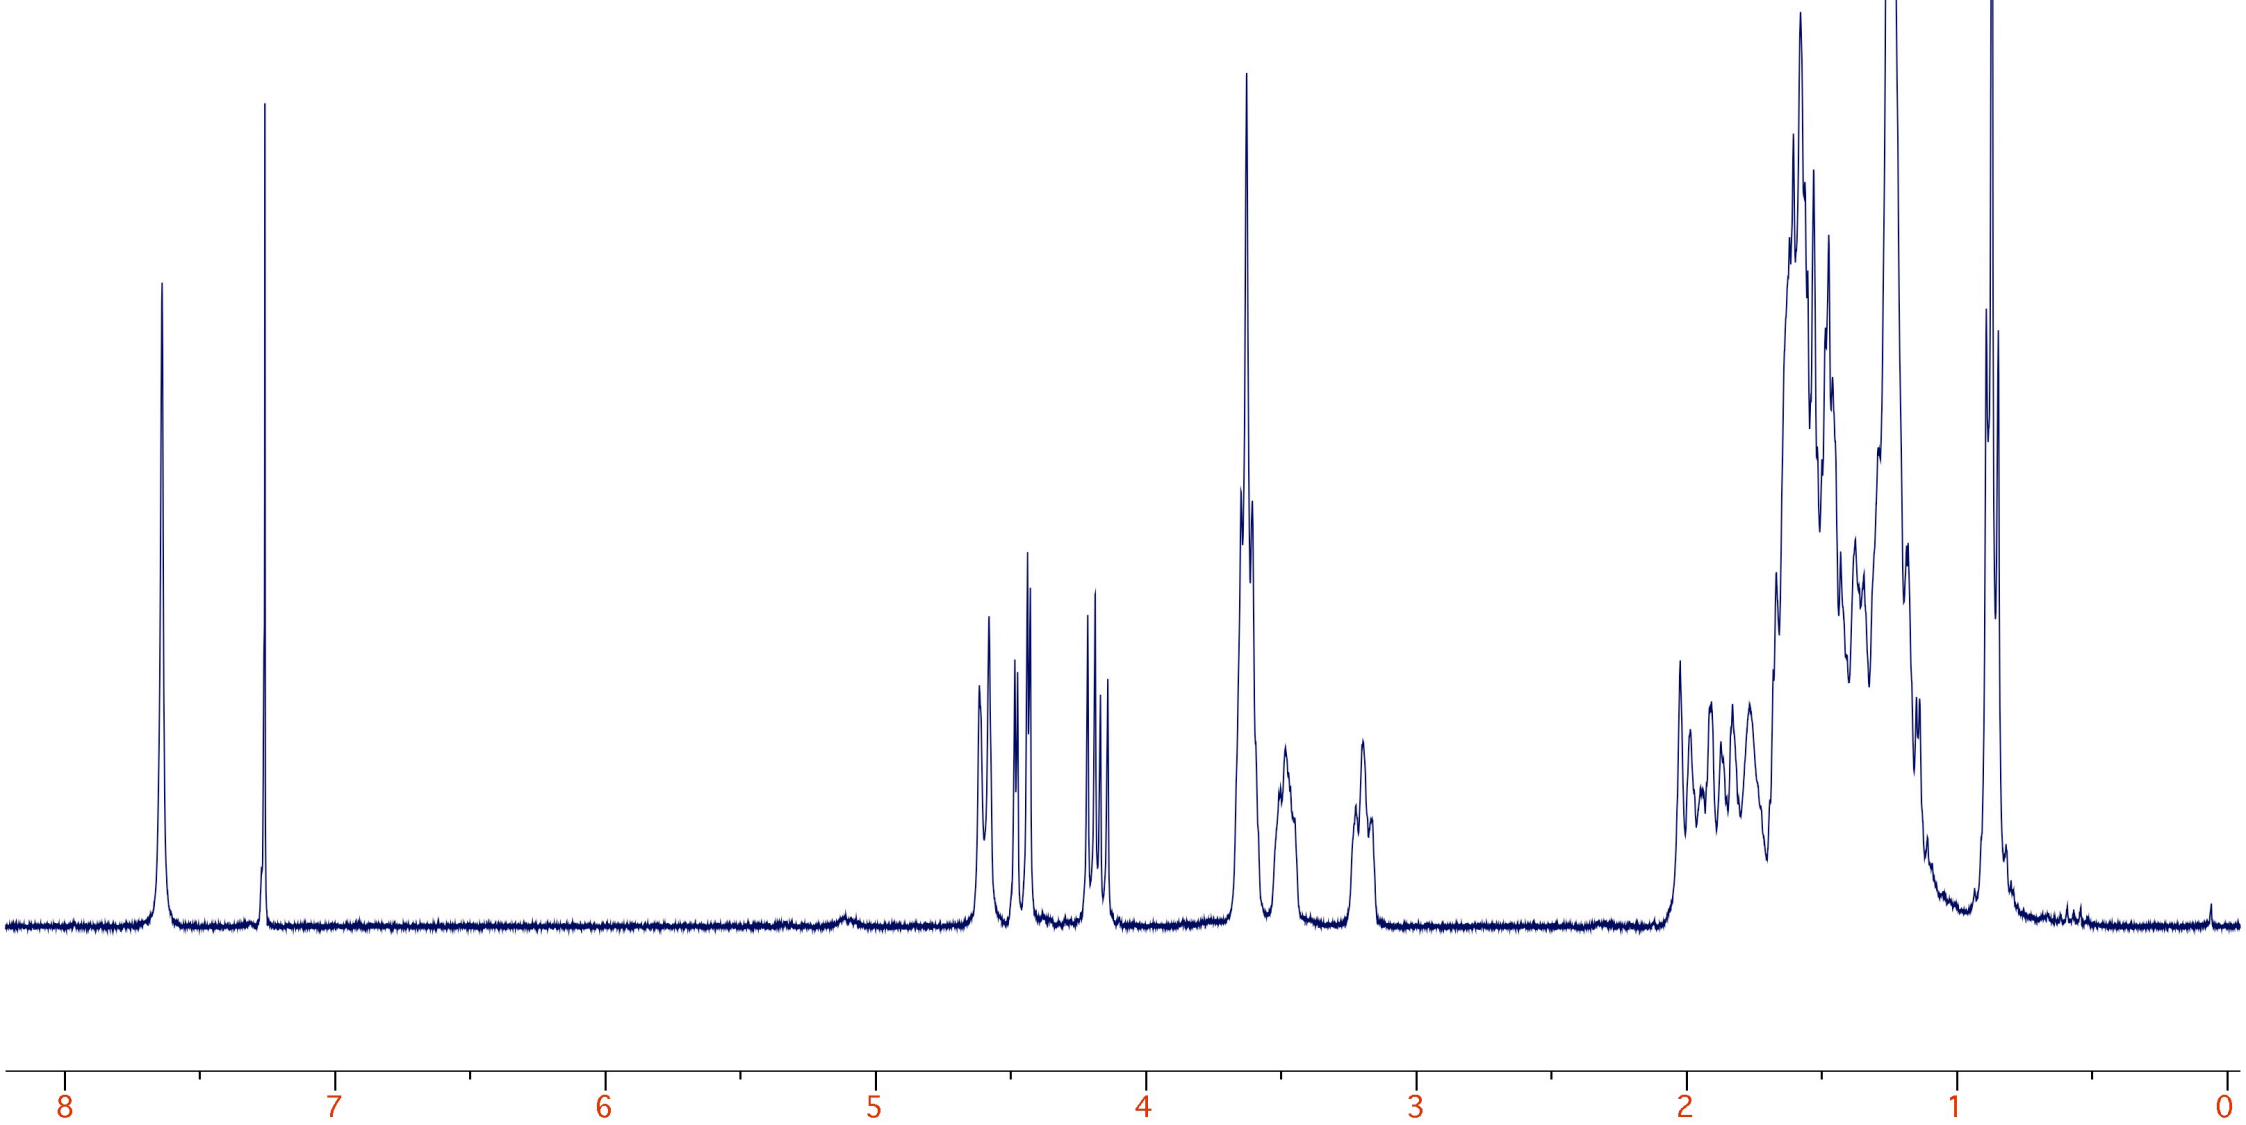

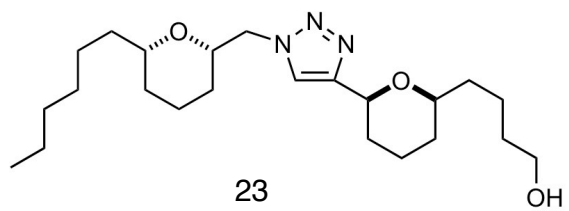

$^{13}\text{C}$  NMR ( $\text{CDCl}_3$ , 125 MHz)

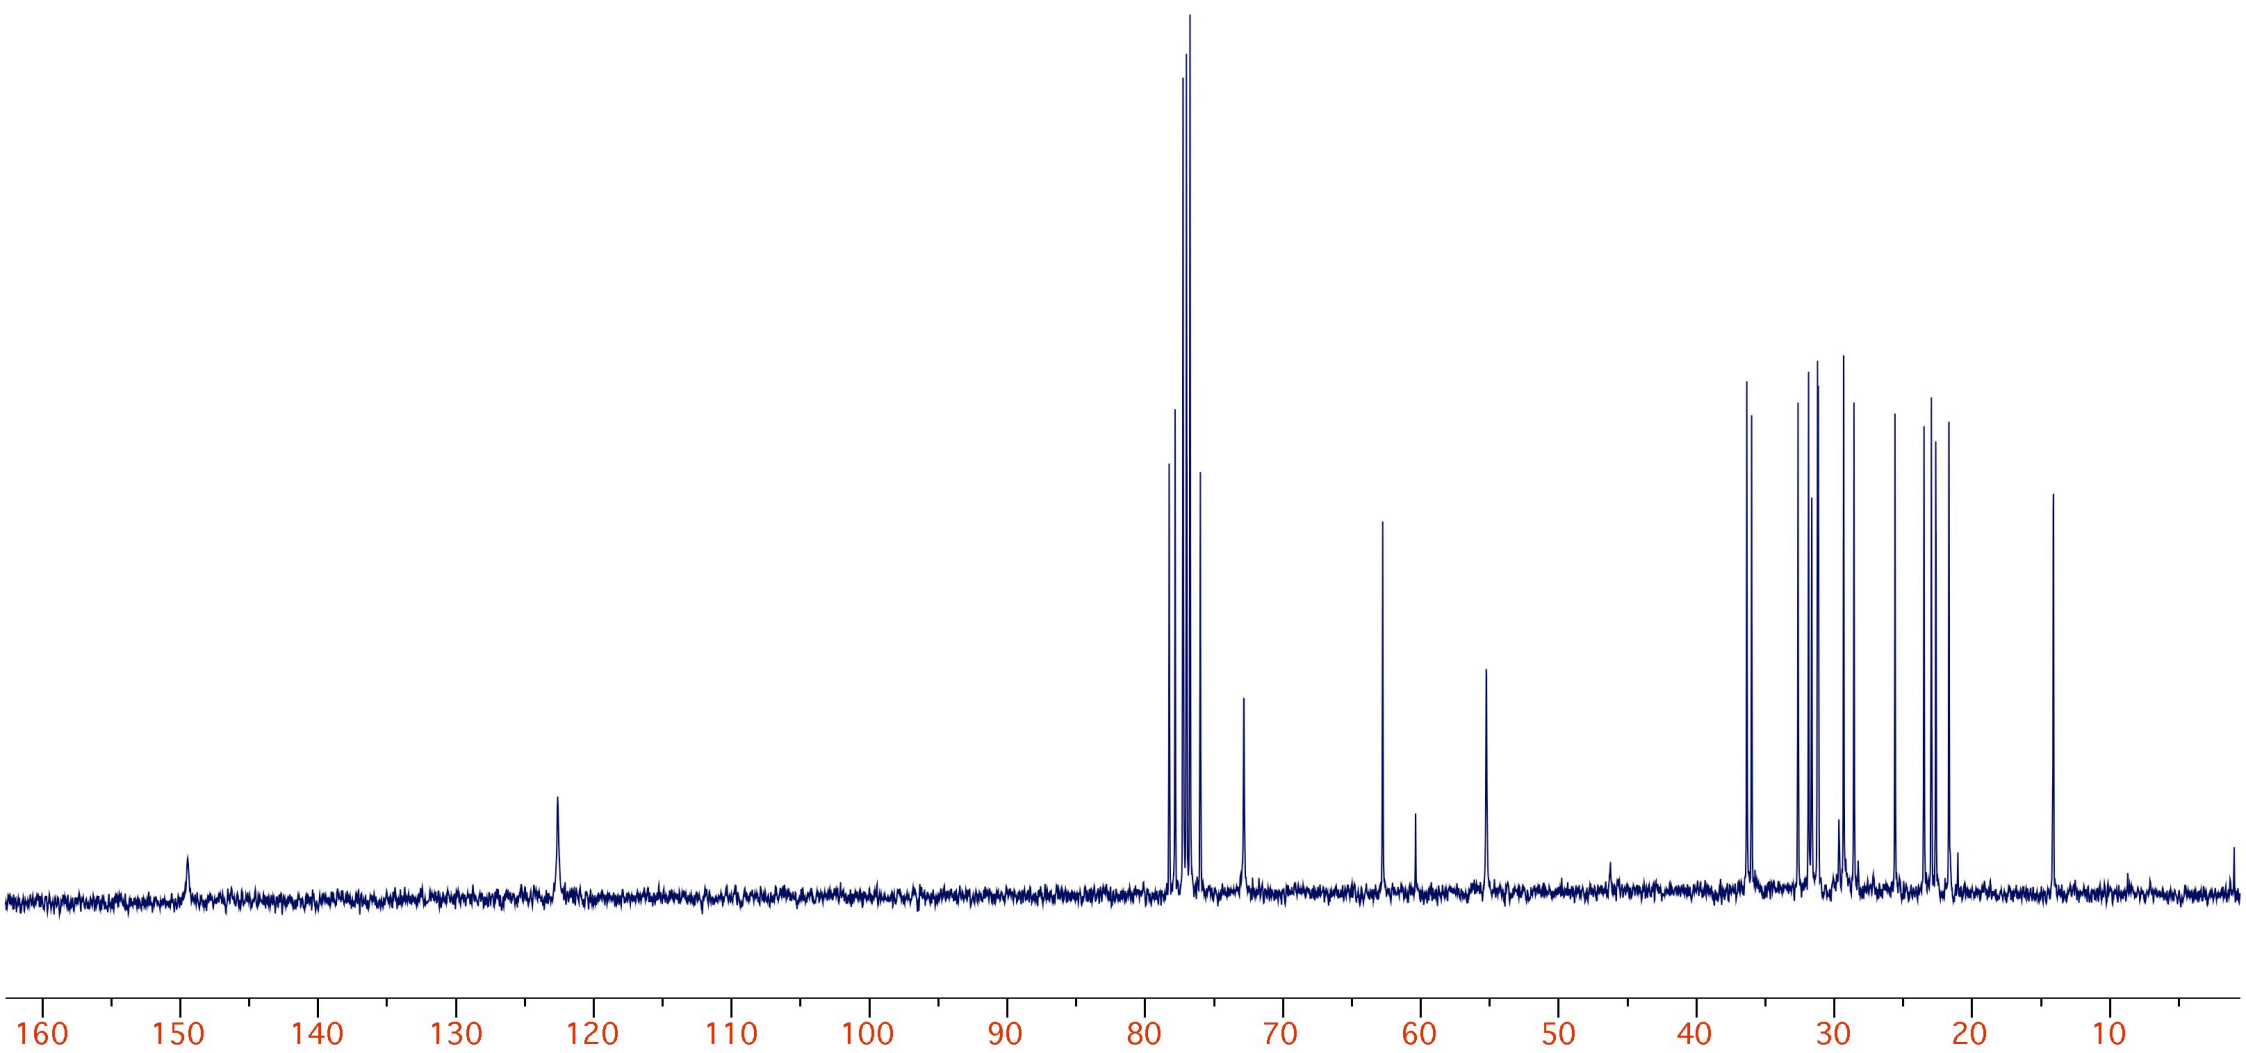

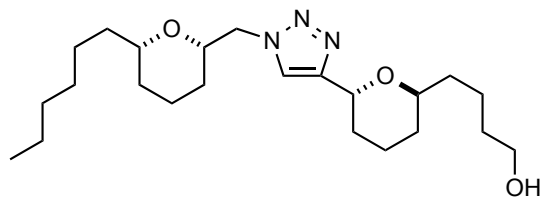

24

$^1\text{H}$  NMR ( $\text{CDCl}_3$ , 500 MHz)

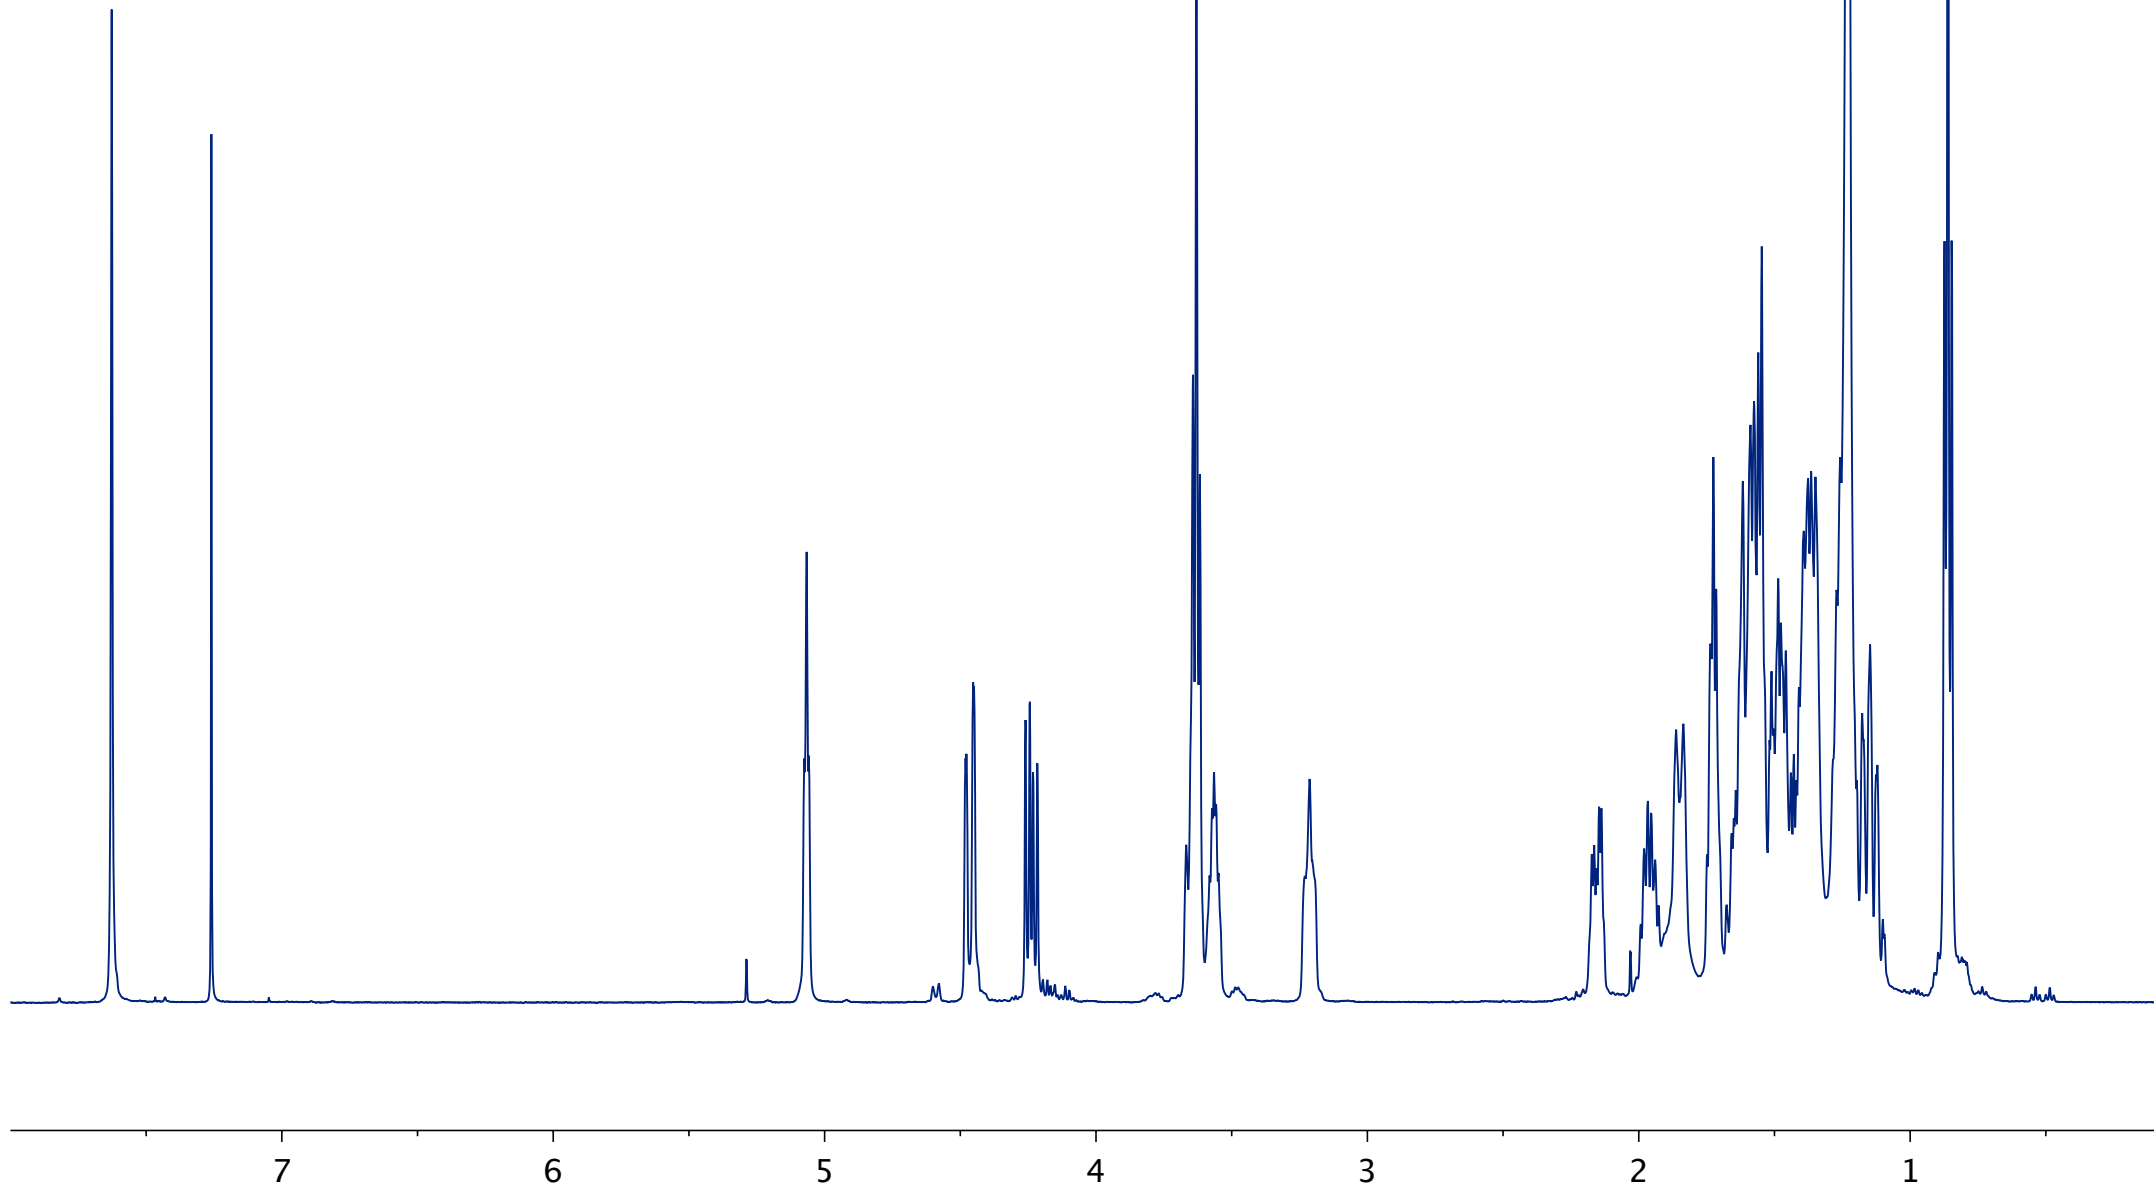

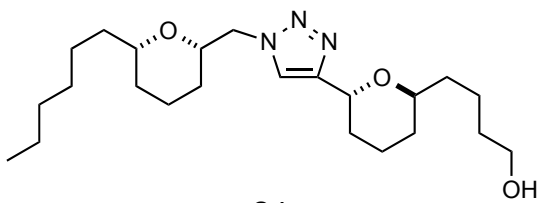

24

$^{13}\text{C}$  NMR ( $\text{CDCl}_3$ , 125 MHz)

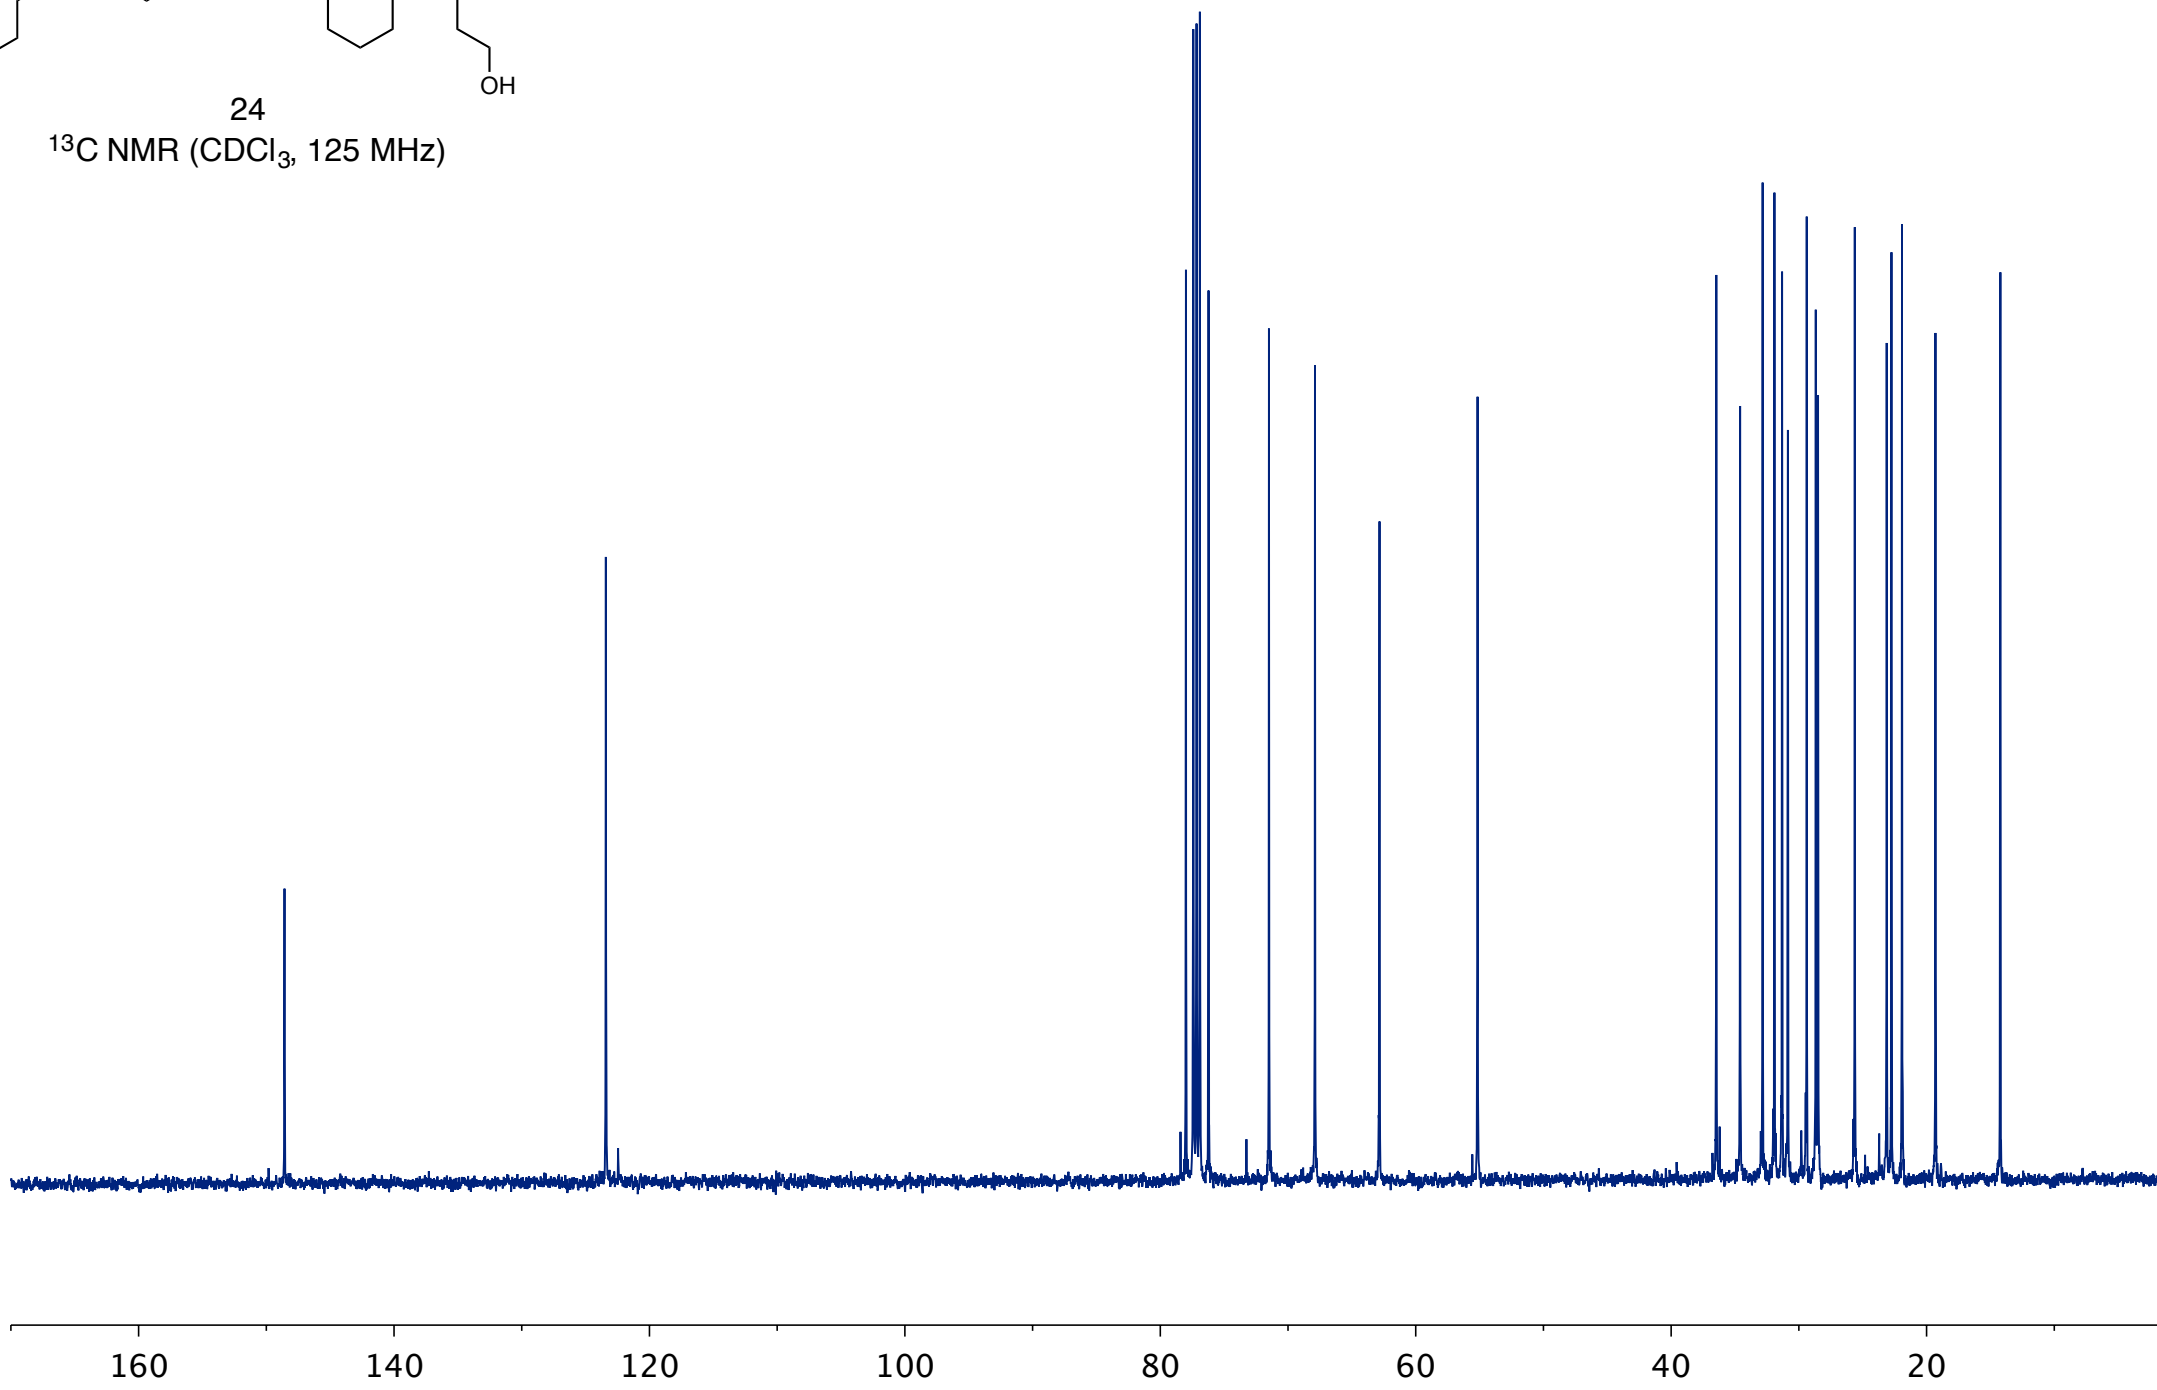



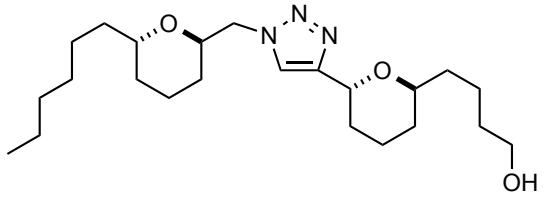

25

$^1\text{H}$  NMR ( $\text{CDCl}_3$ , 500 MHz)

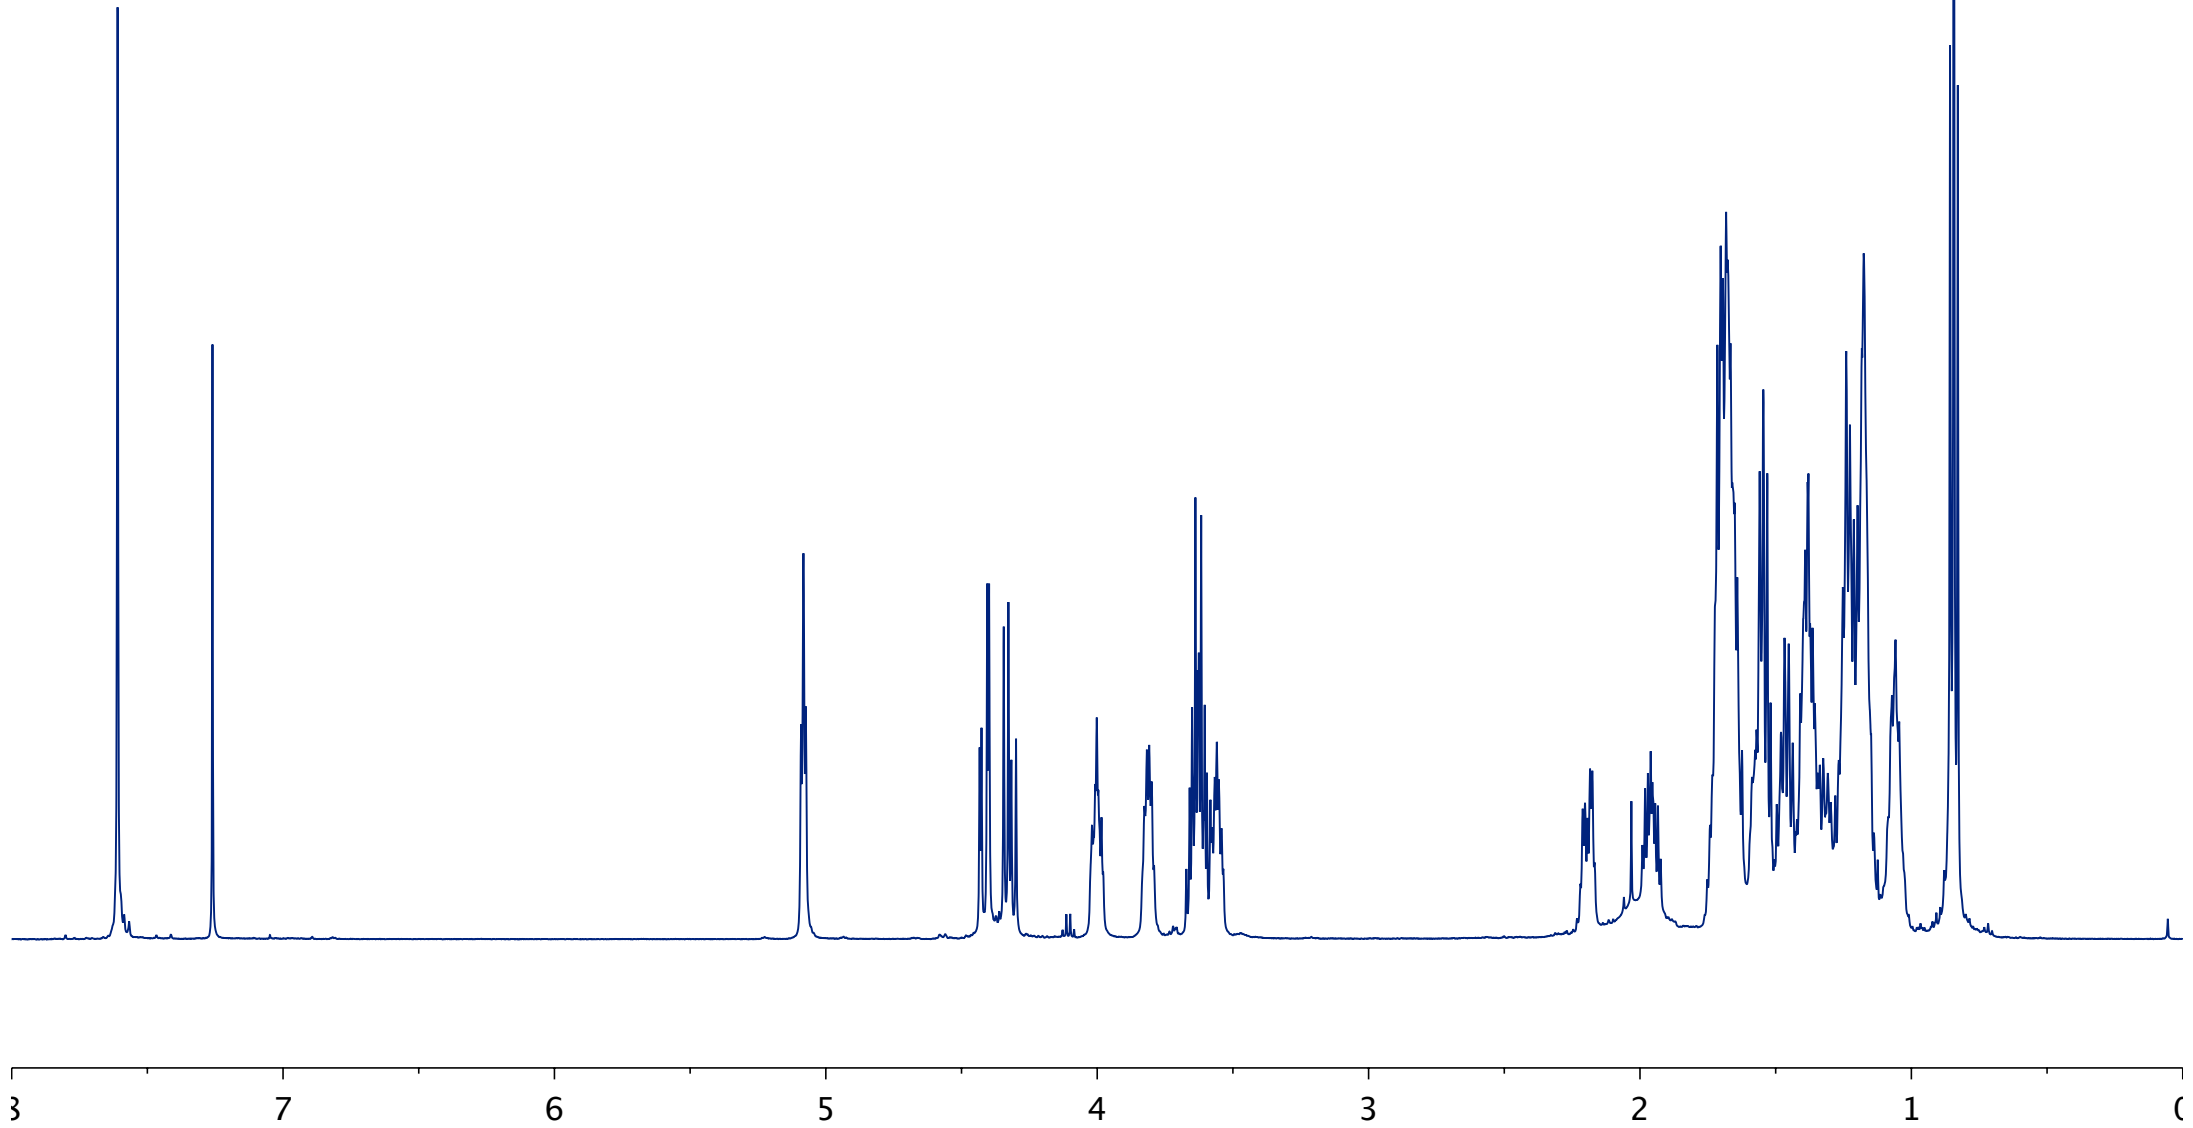

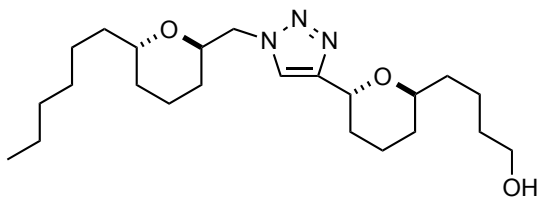

25

$^{13}\text{C}$  NMR ( $\text{CDCl}_3$ , 125 MHz)

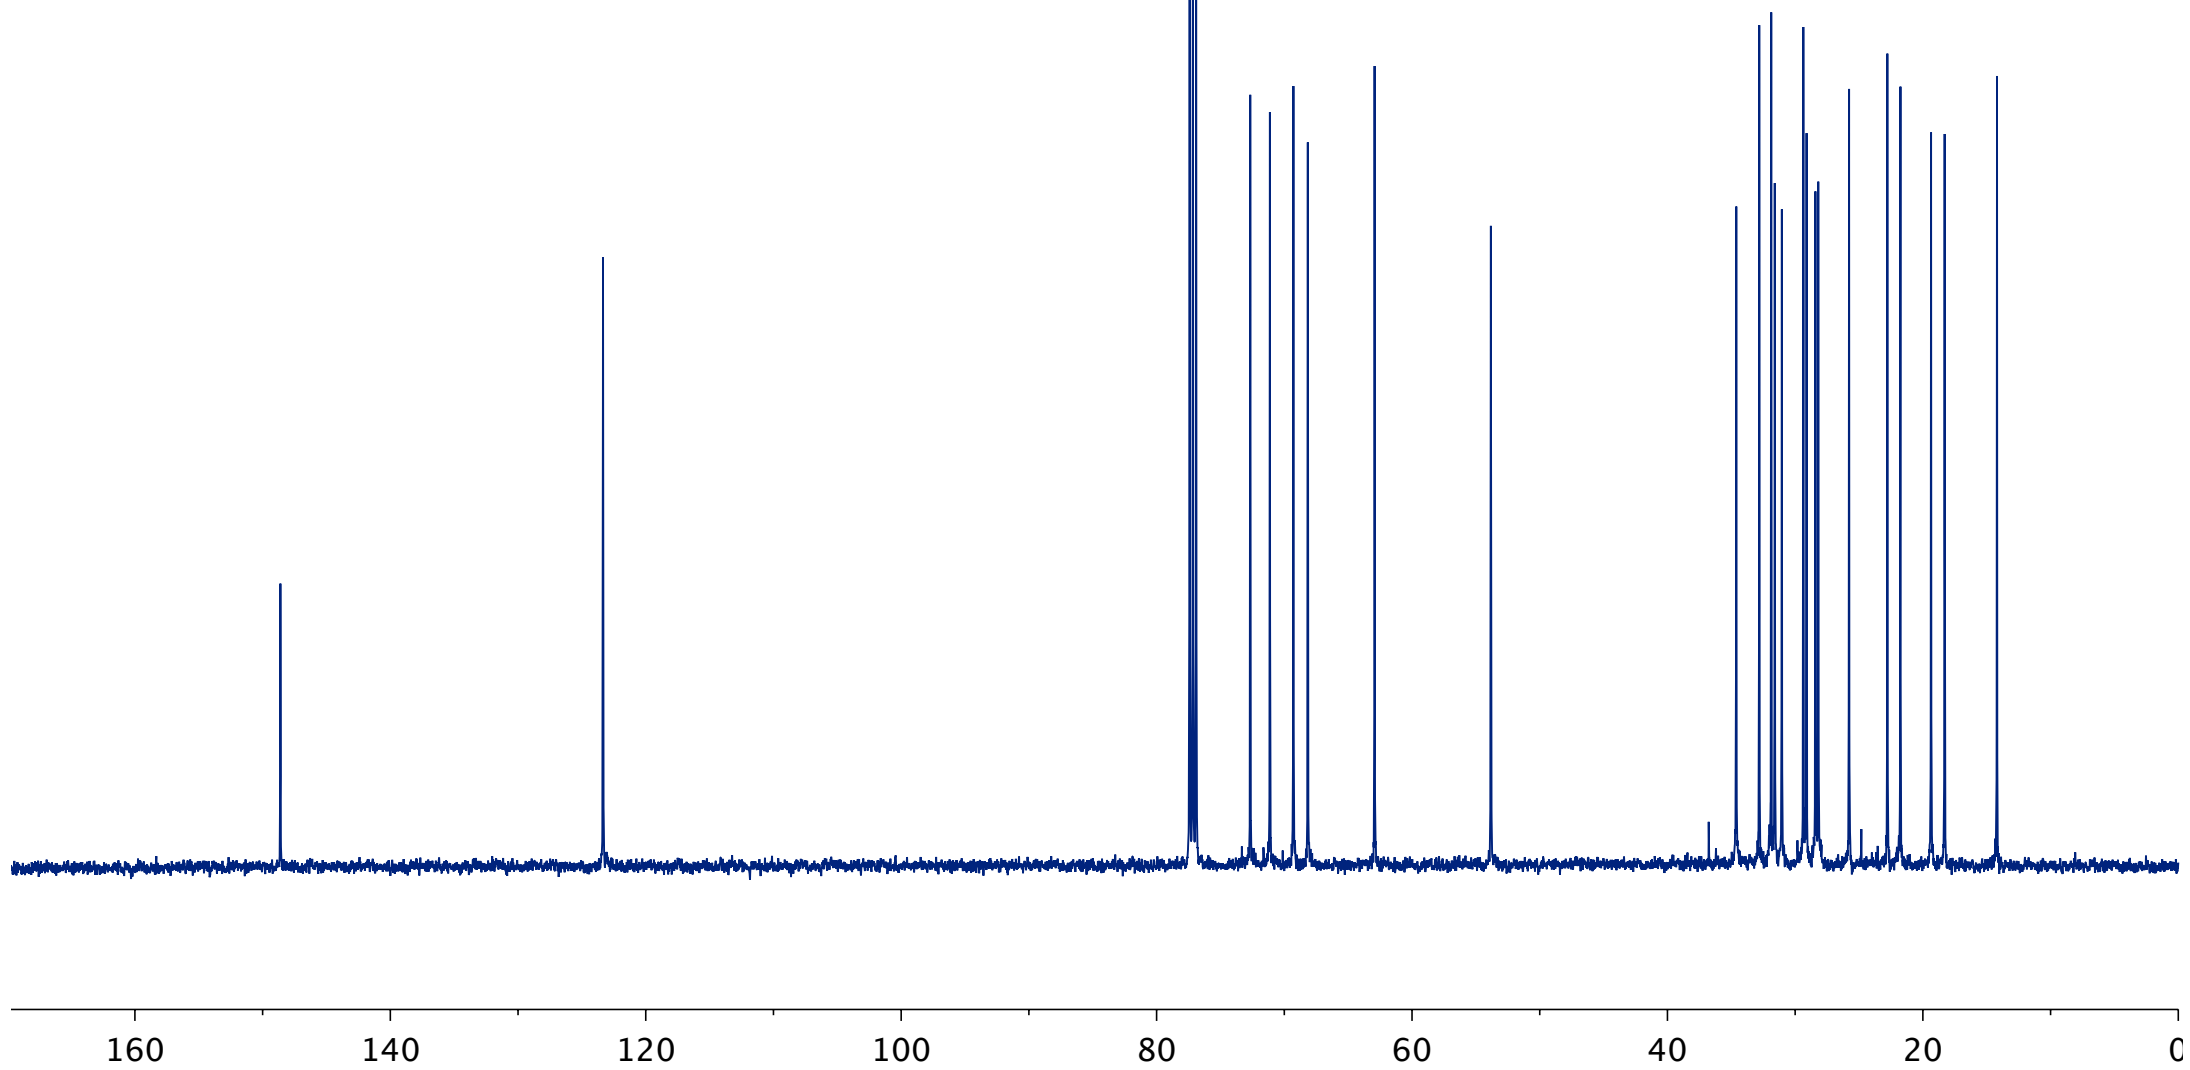

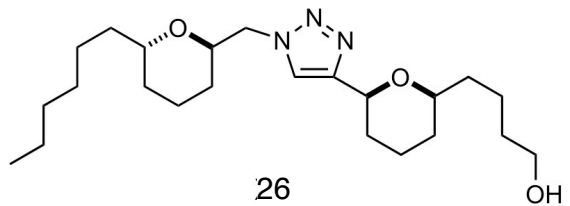

26  
<sup>1</sup>H NMR (CDCl<sub>3</sub>, 400 MHz)

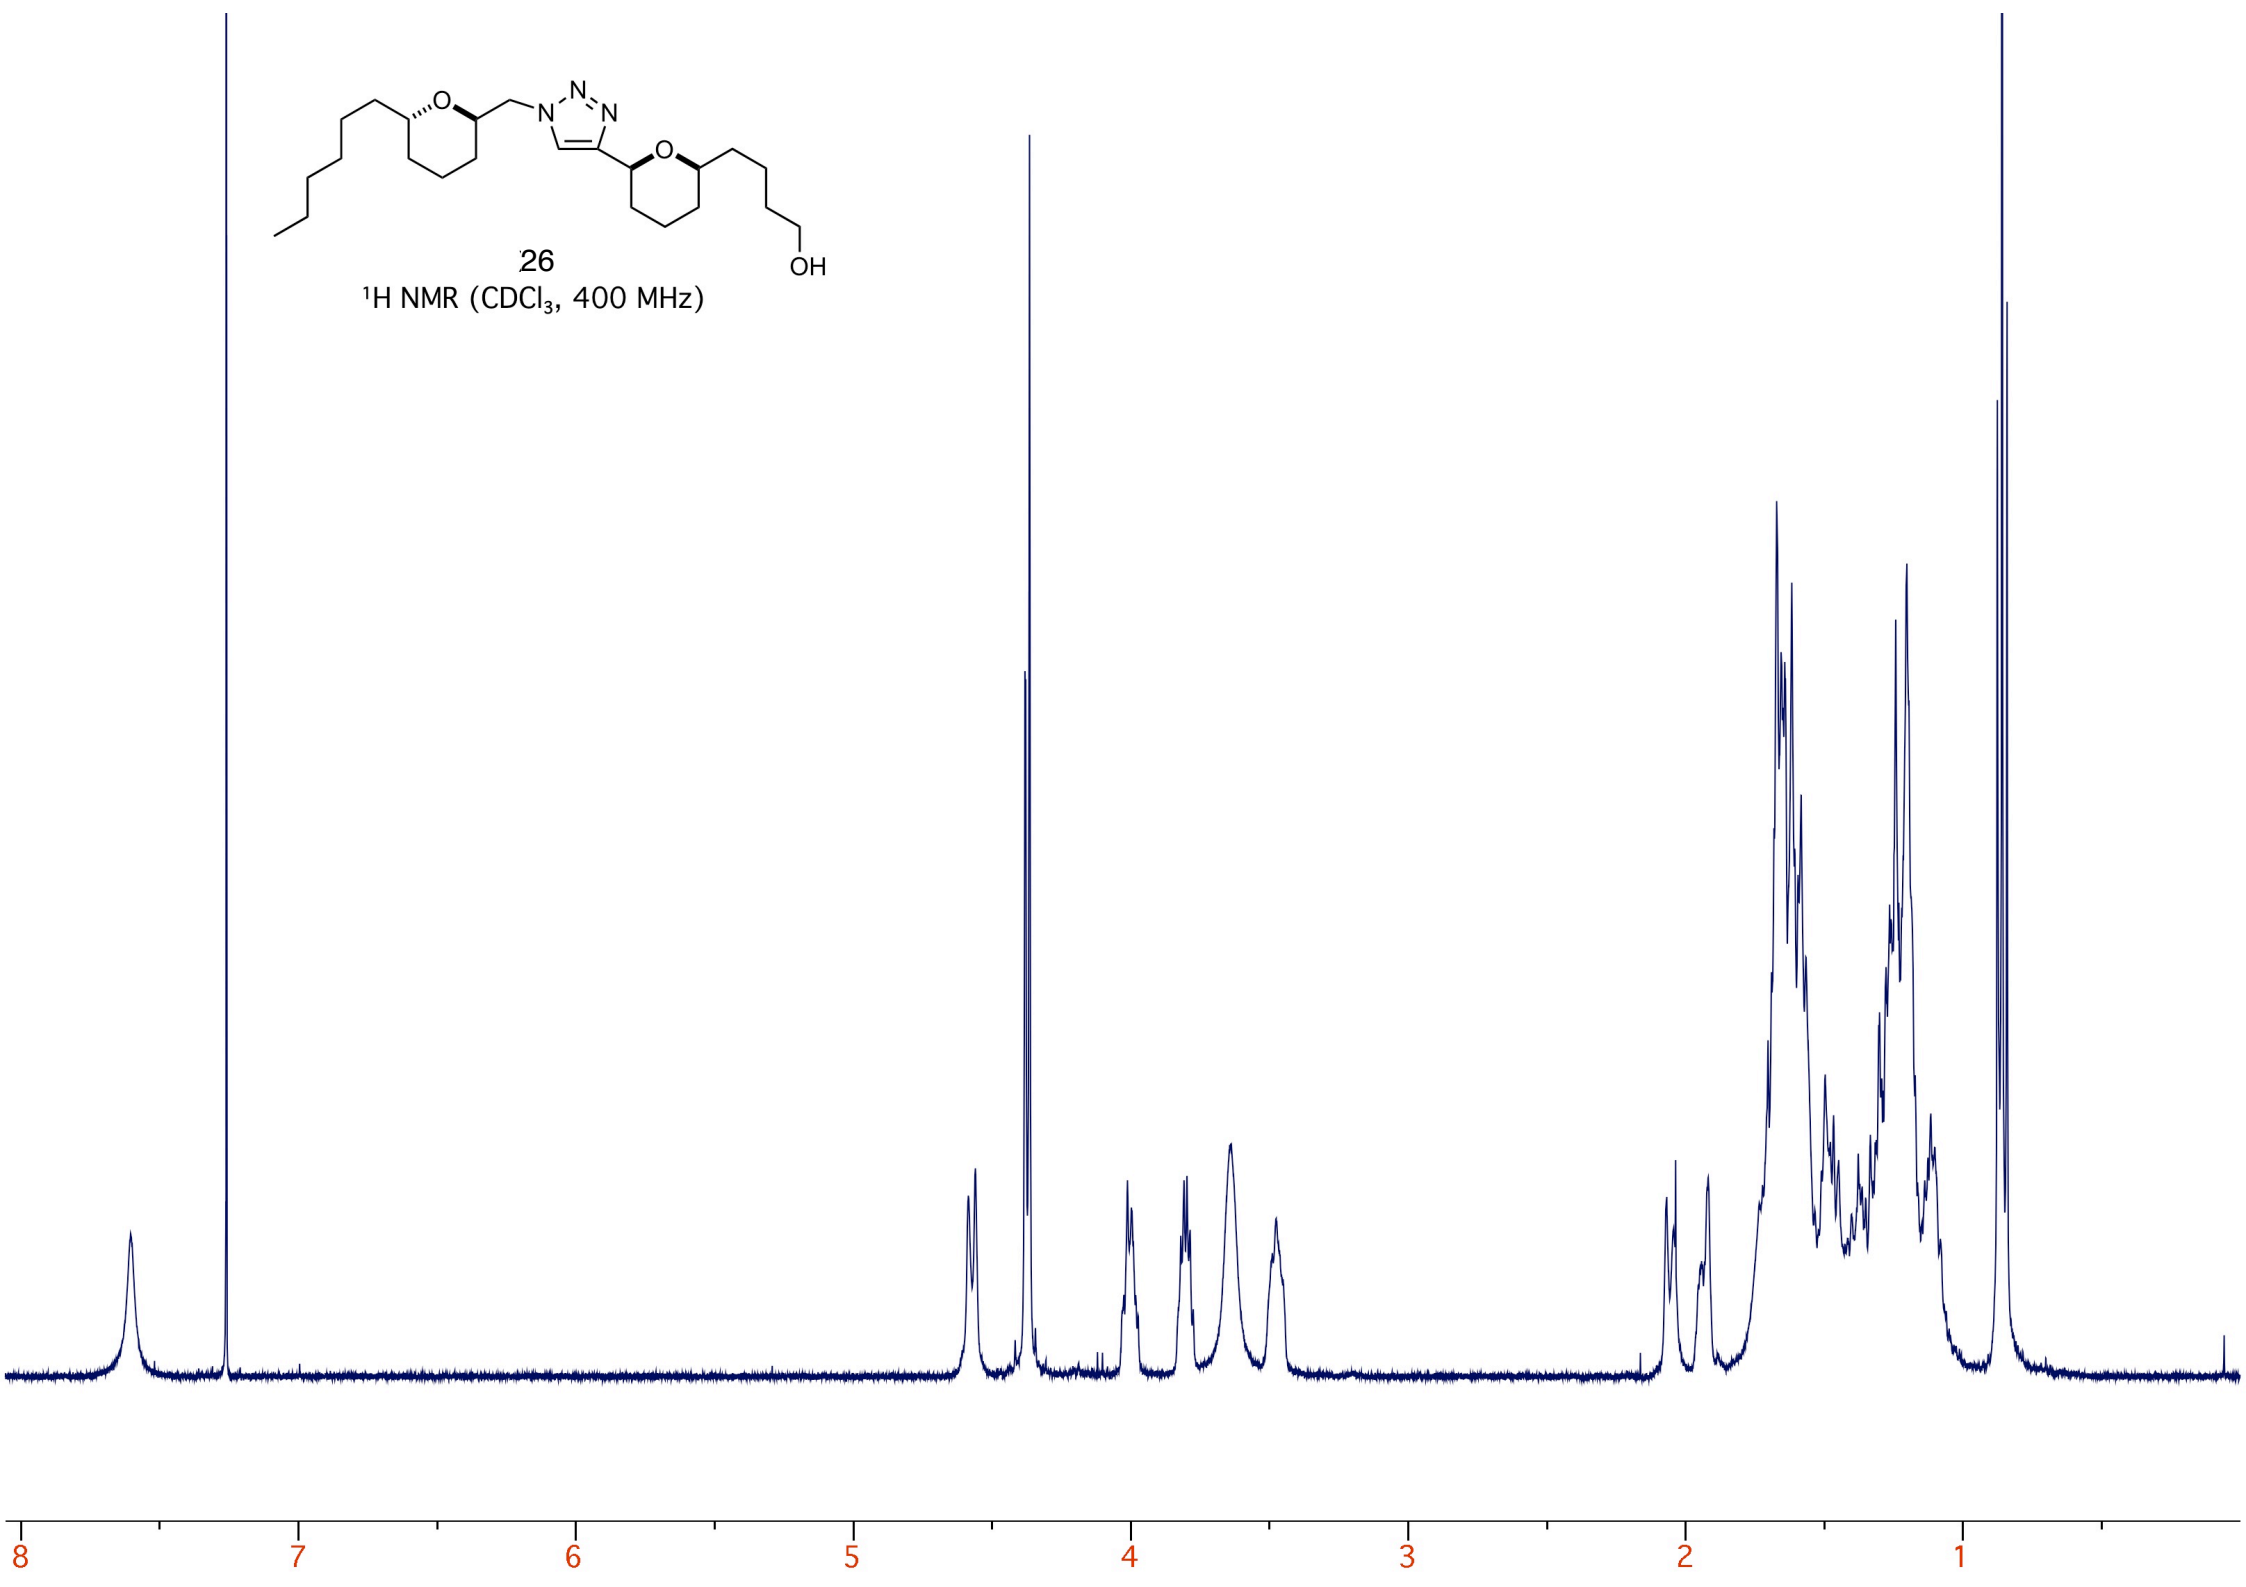

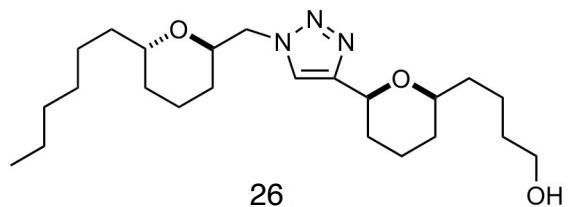

26

$^{13}\text{C}$  NMR ( $\text{CDCl}_3$ , 125 MHz)

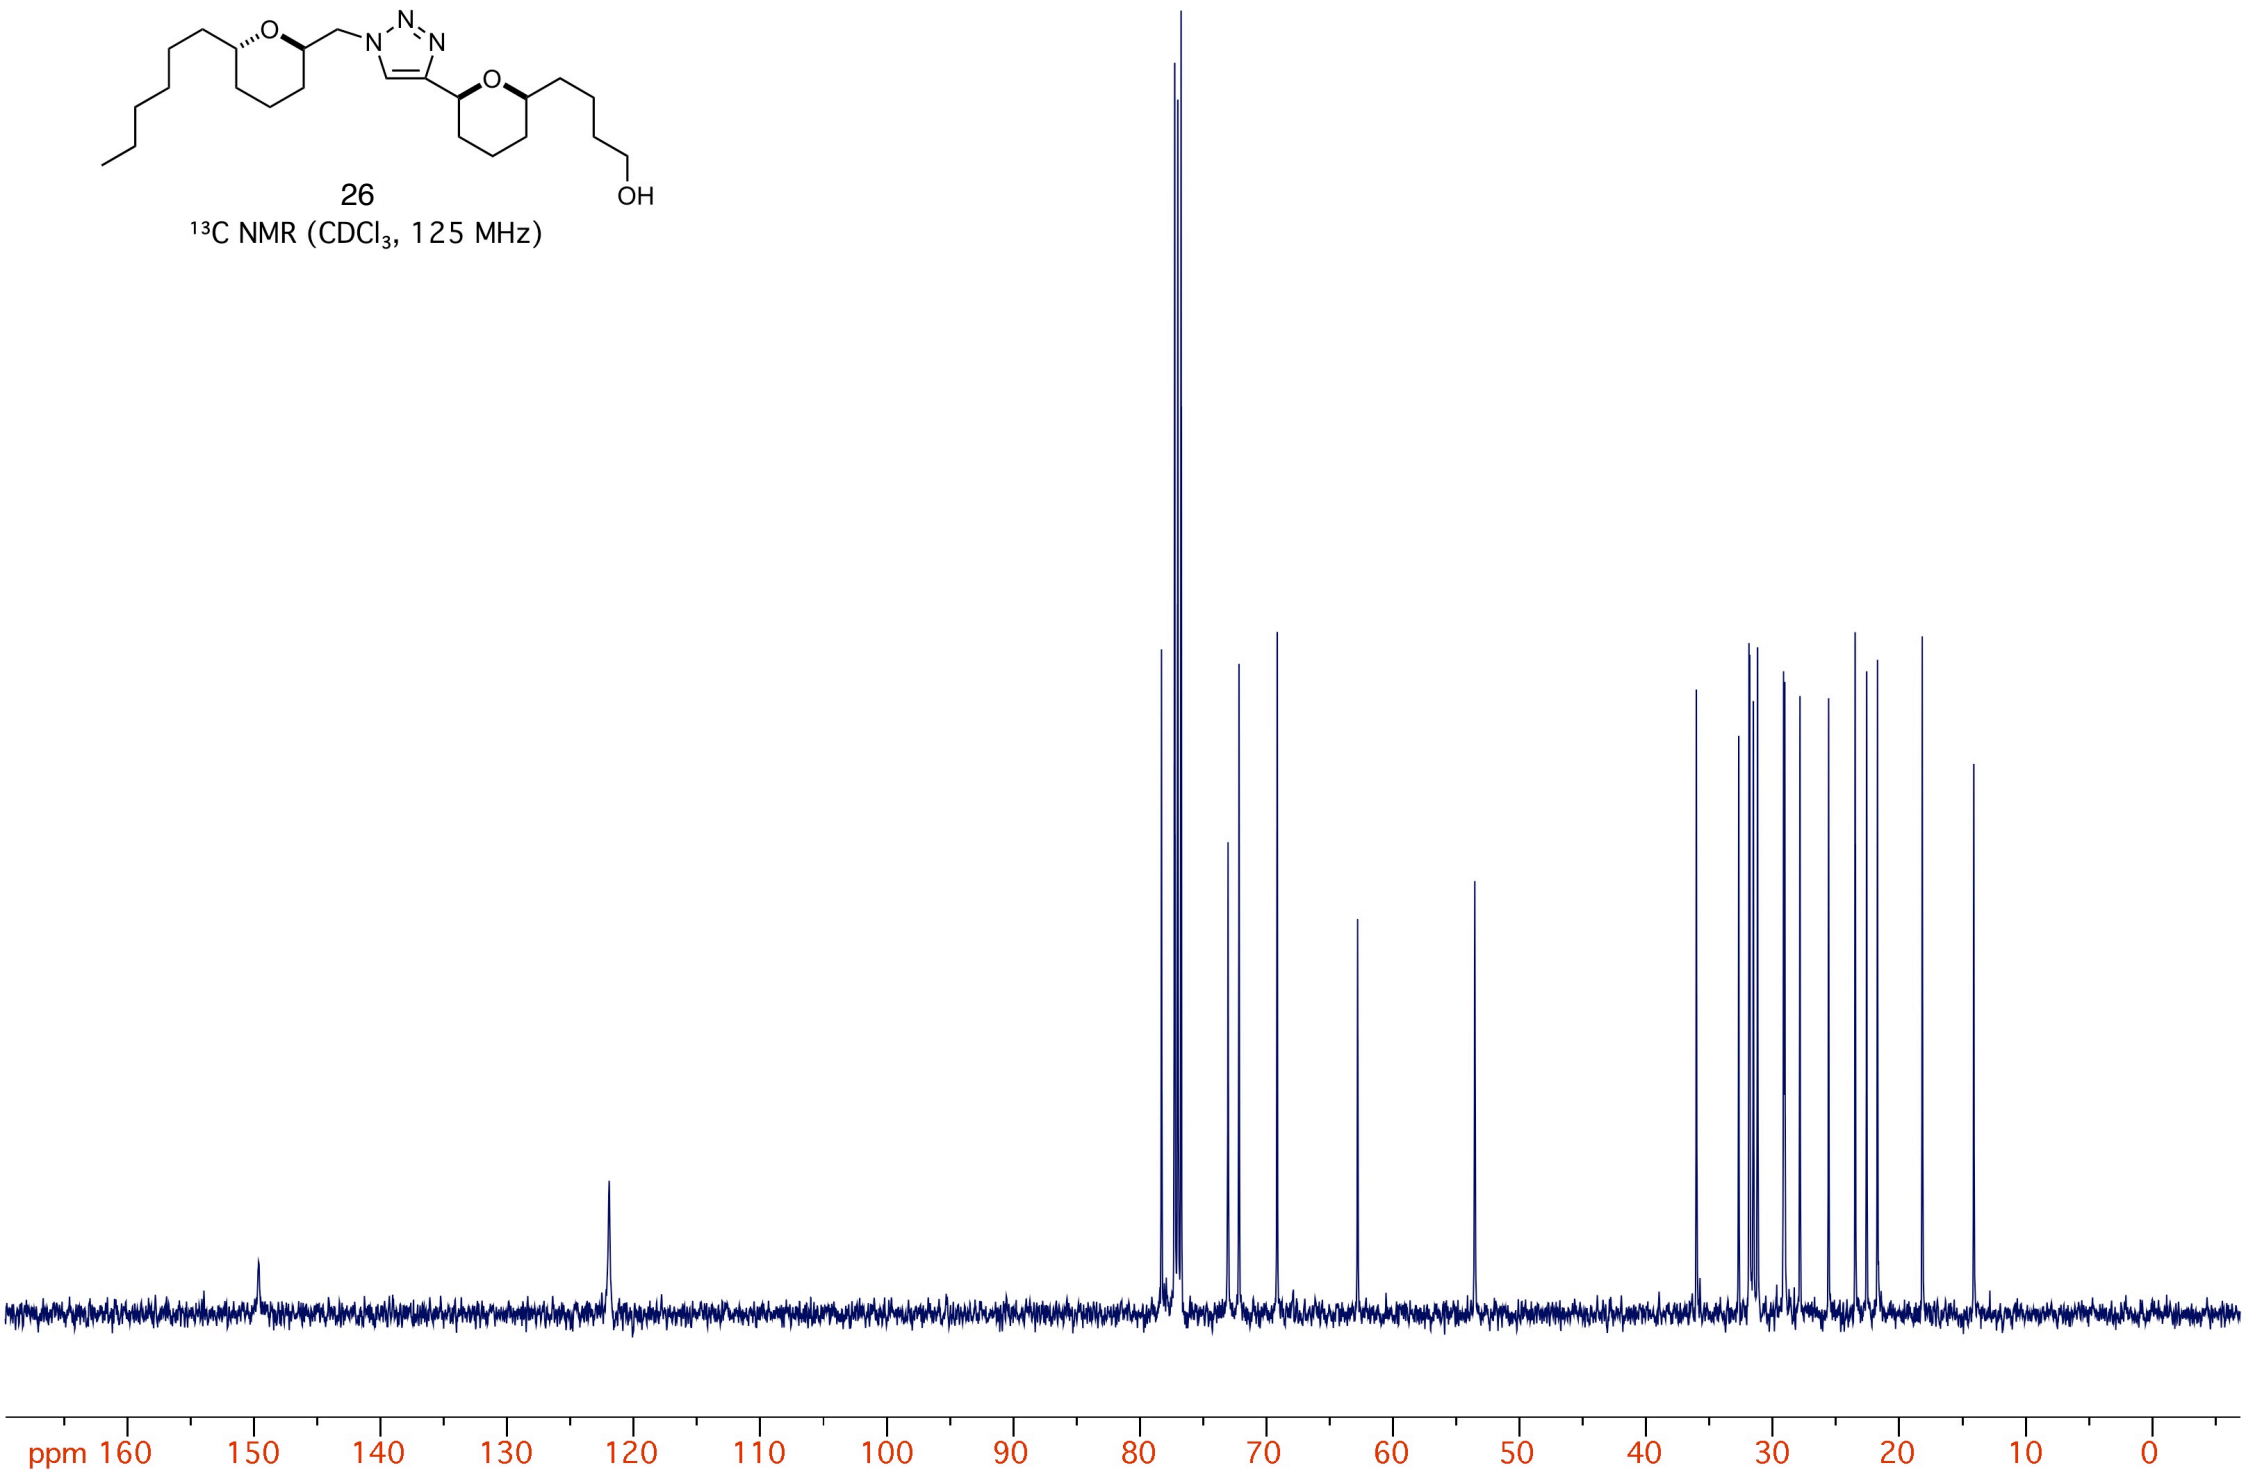

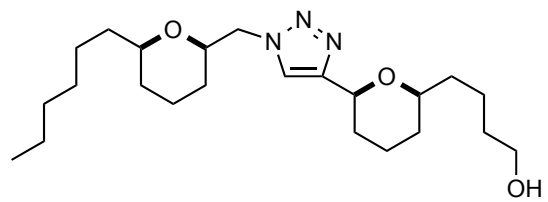

27

$^1\text{H NMR}$  ( $\text{CDCl}_3$ , 500 MHz)

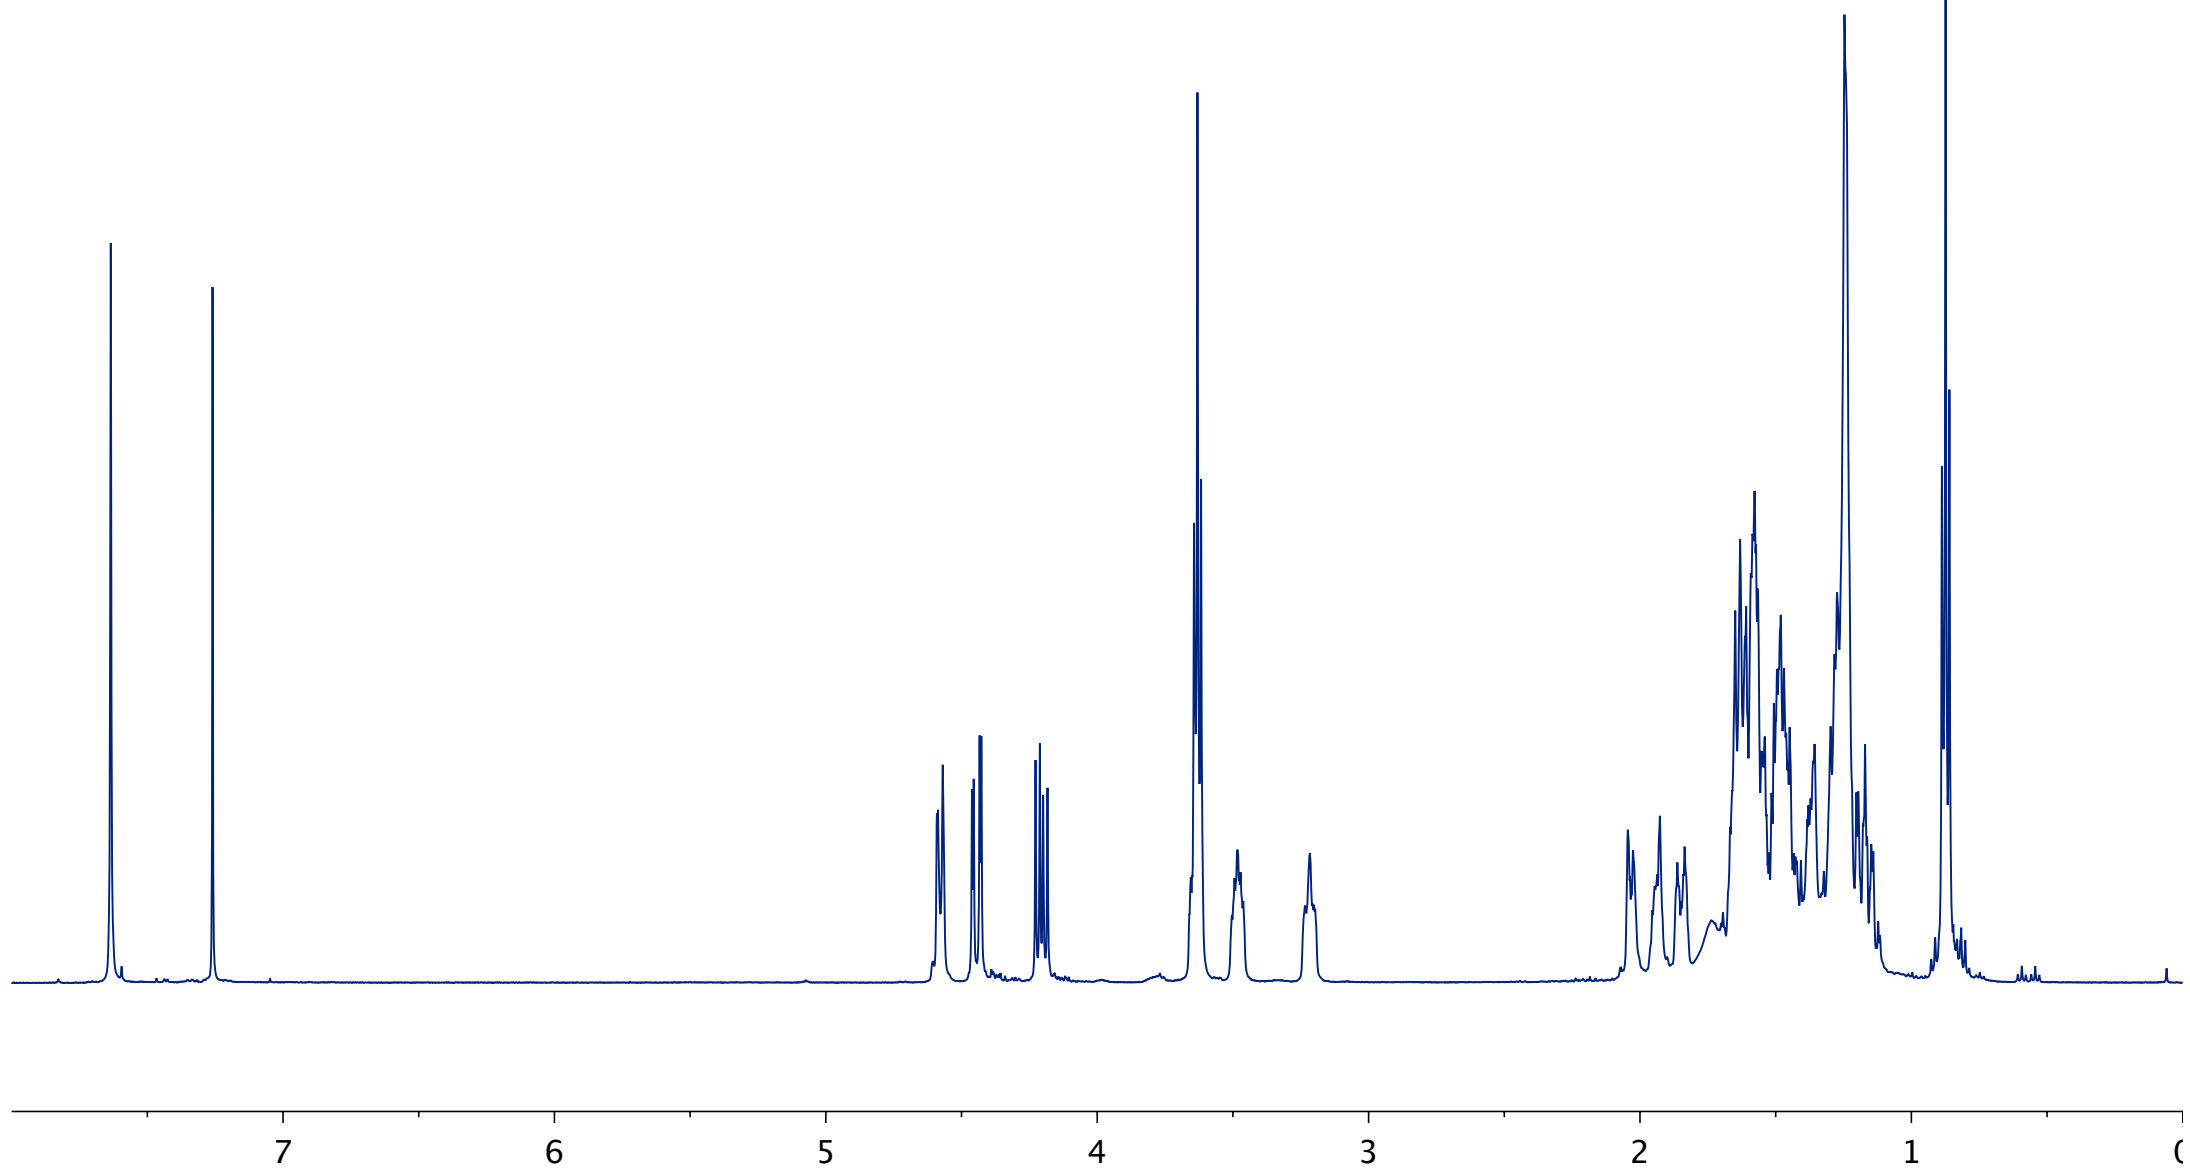

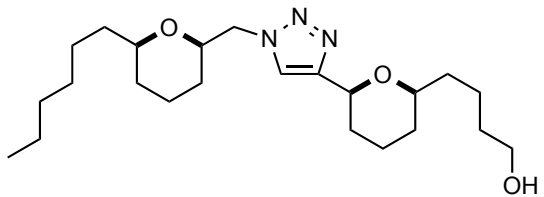

27

$^{13}\text{C}$  NMR ( $\text{CDCl}_3$ , 125 MHz)

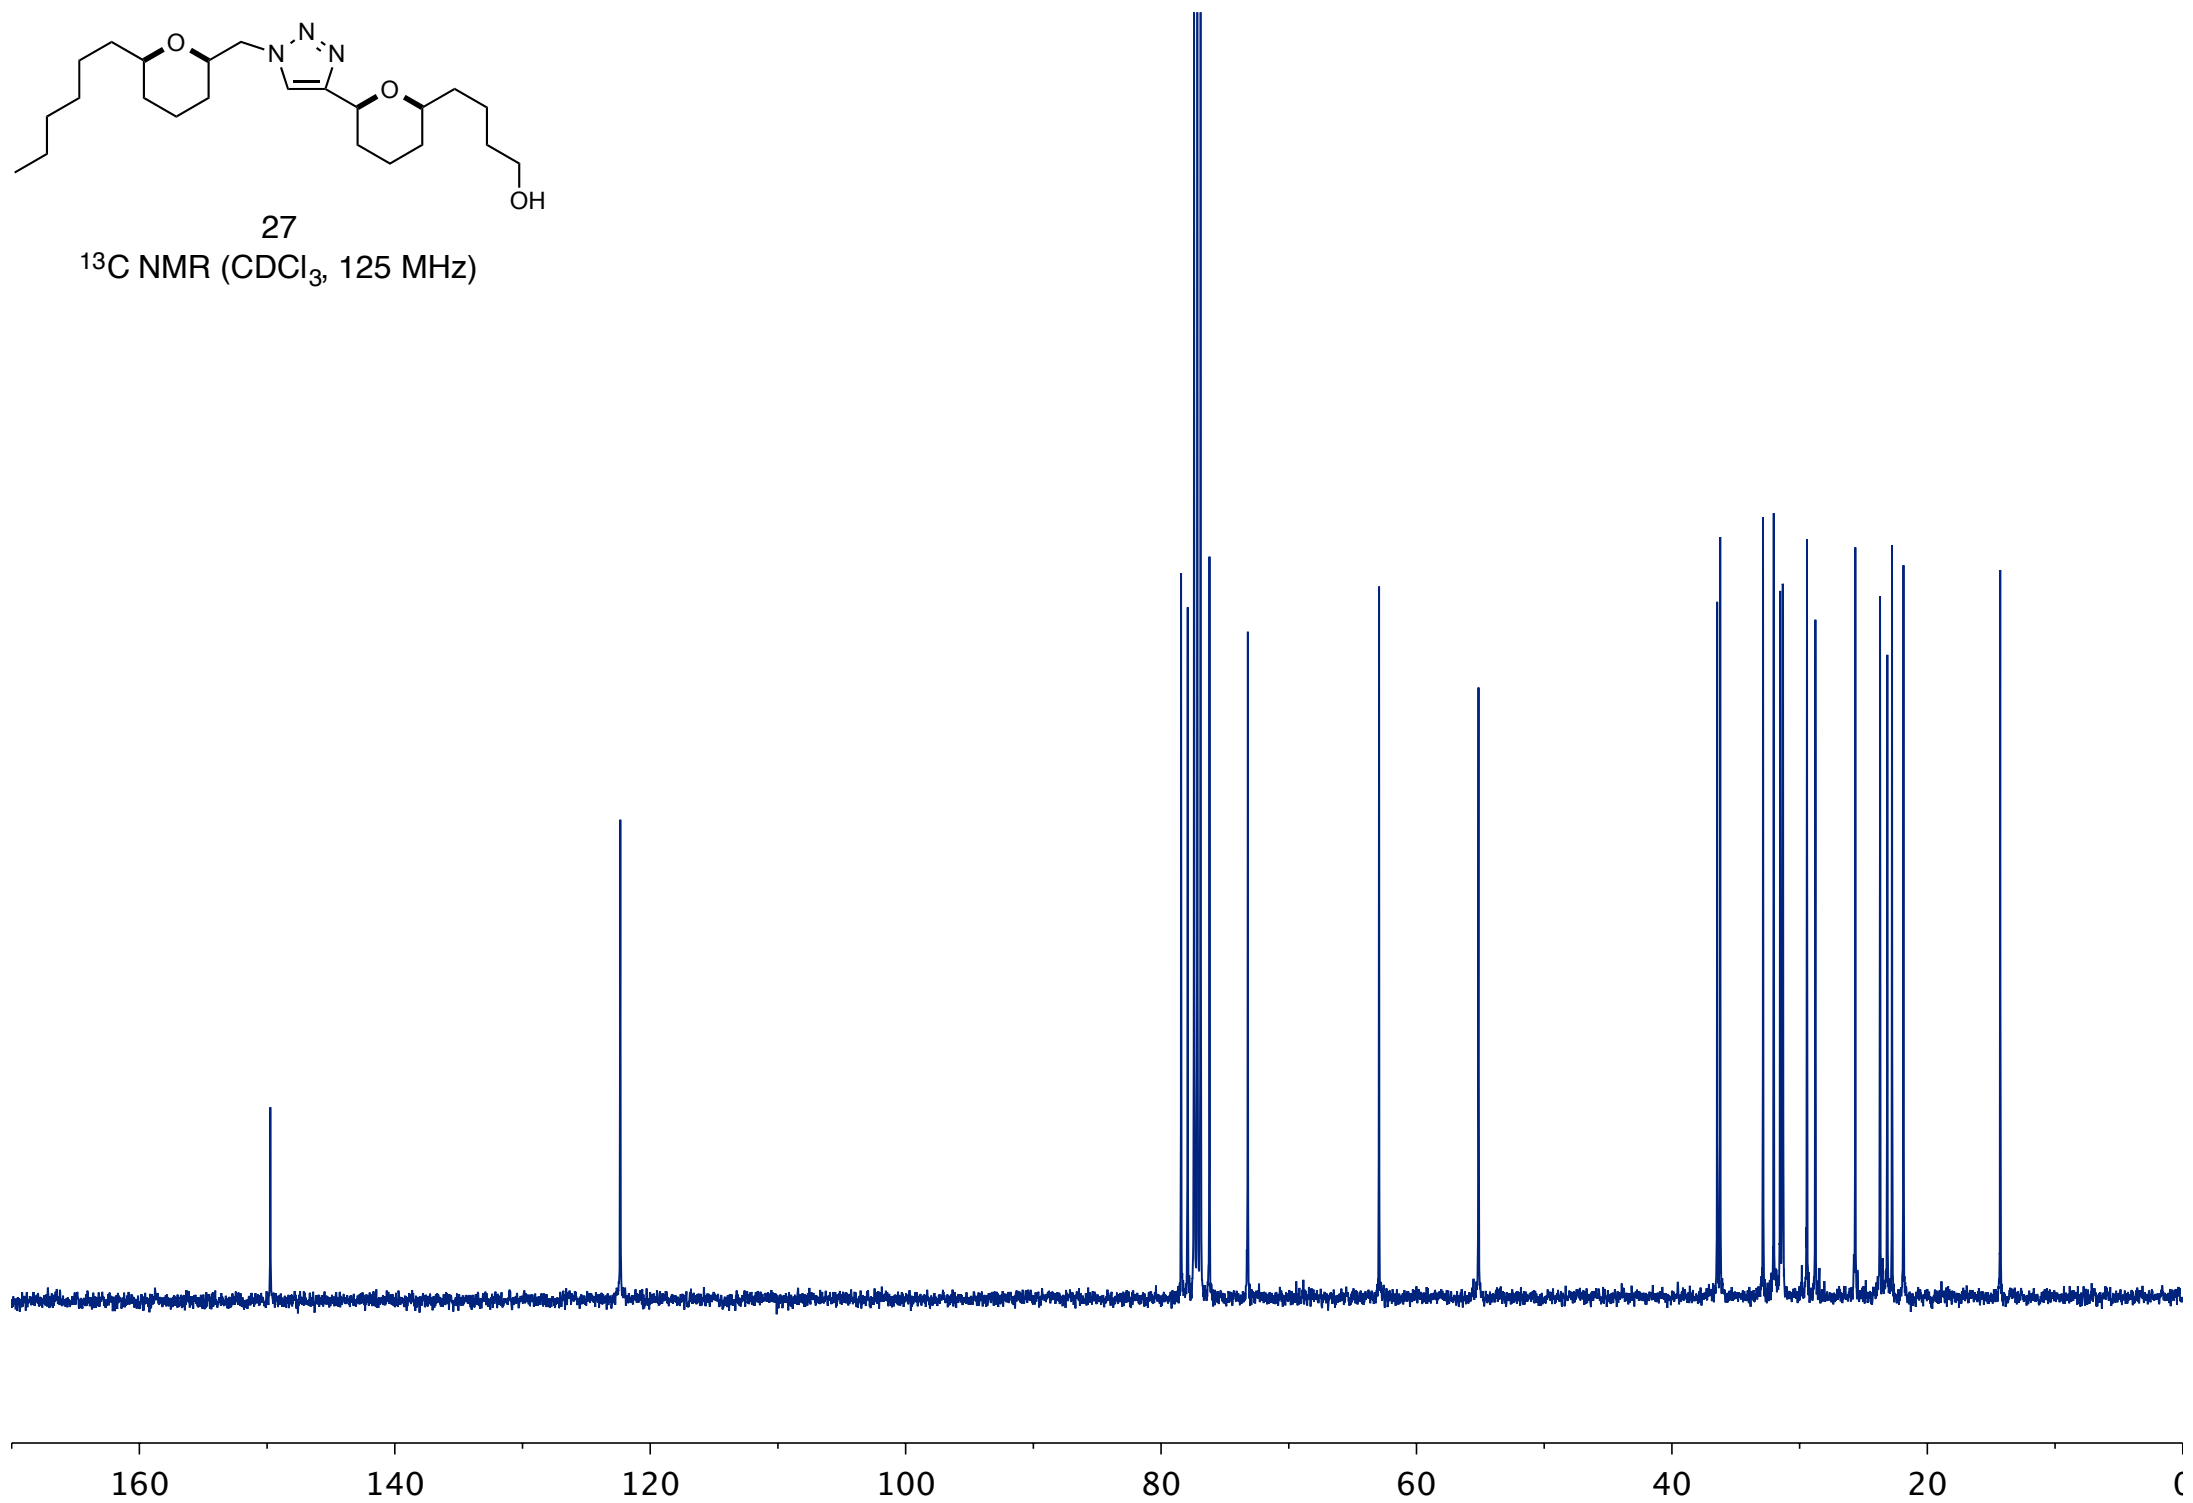

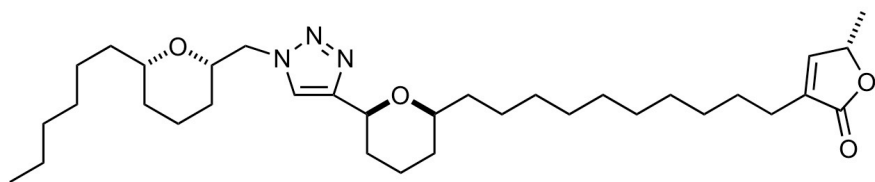

31

$^1\text{H}$  NMR ( $\text{CDCl}_3$ , 400 MHz)

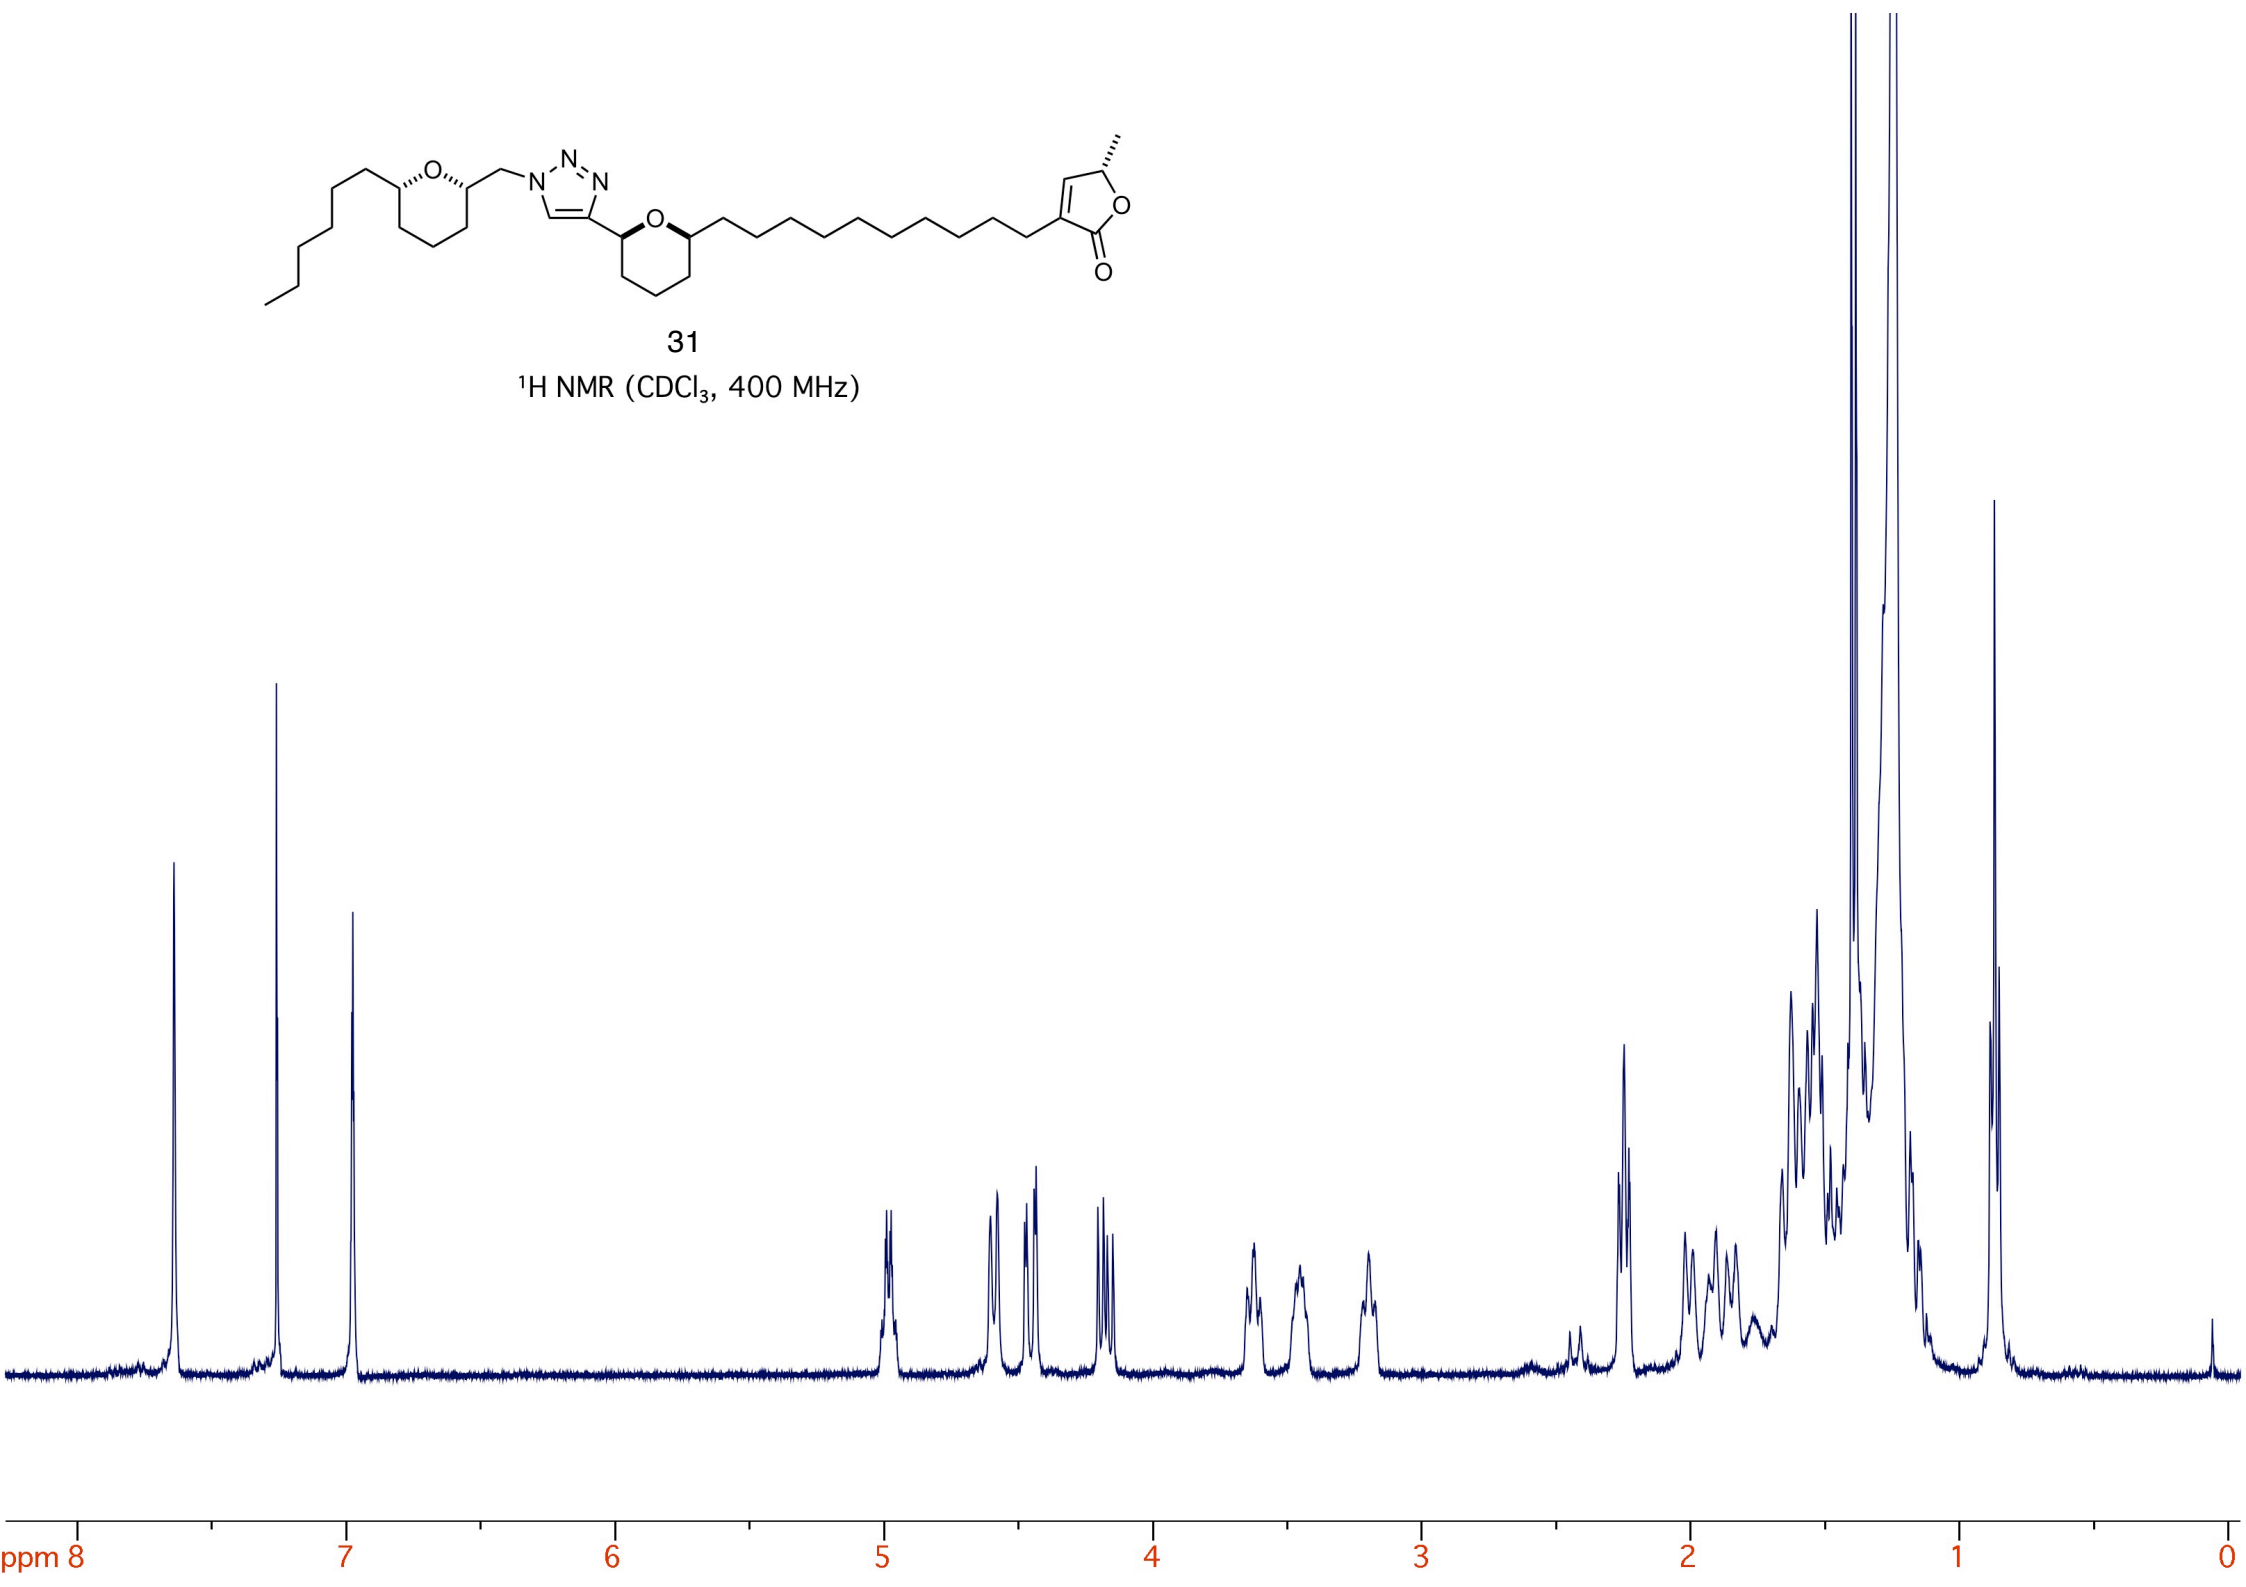

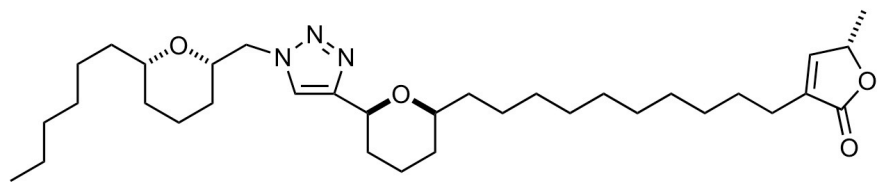

31

$^{13}\text{C}$  NMR ( $\text{CDCl}_3$ , 125 MHz)

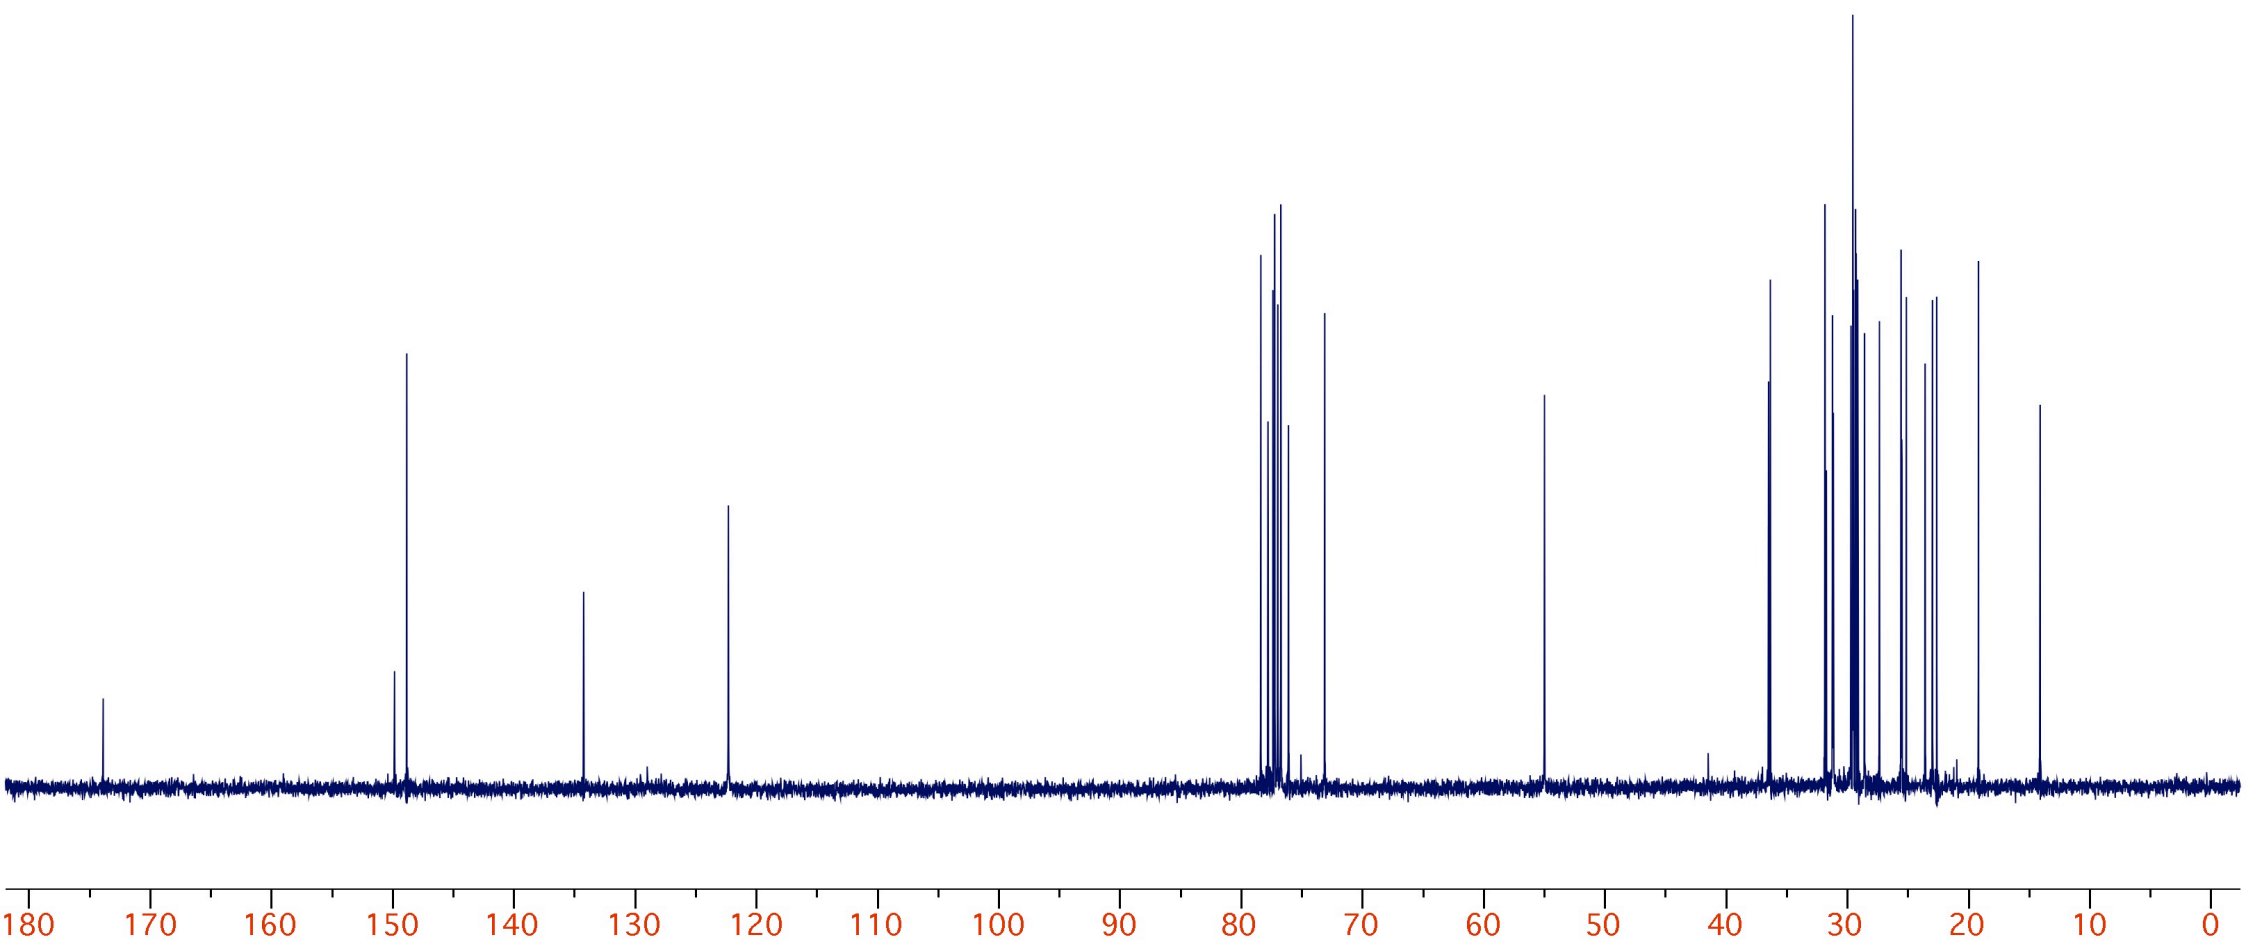



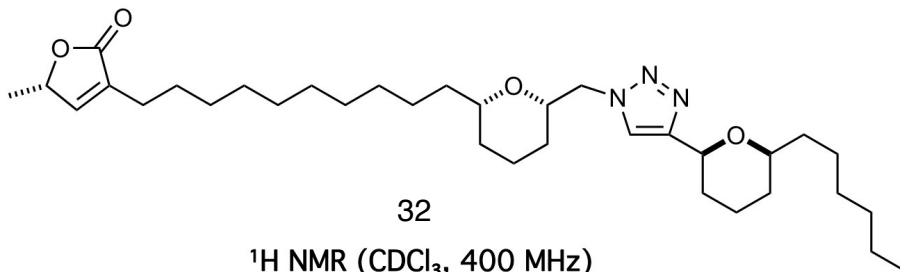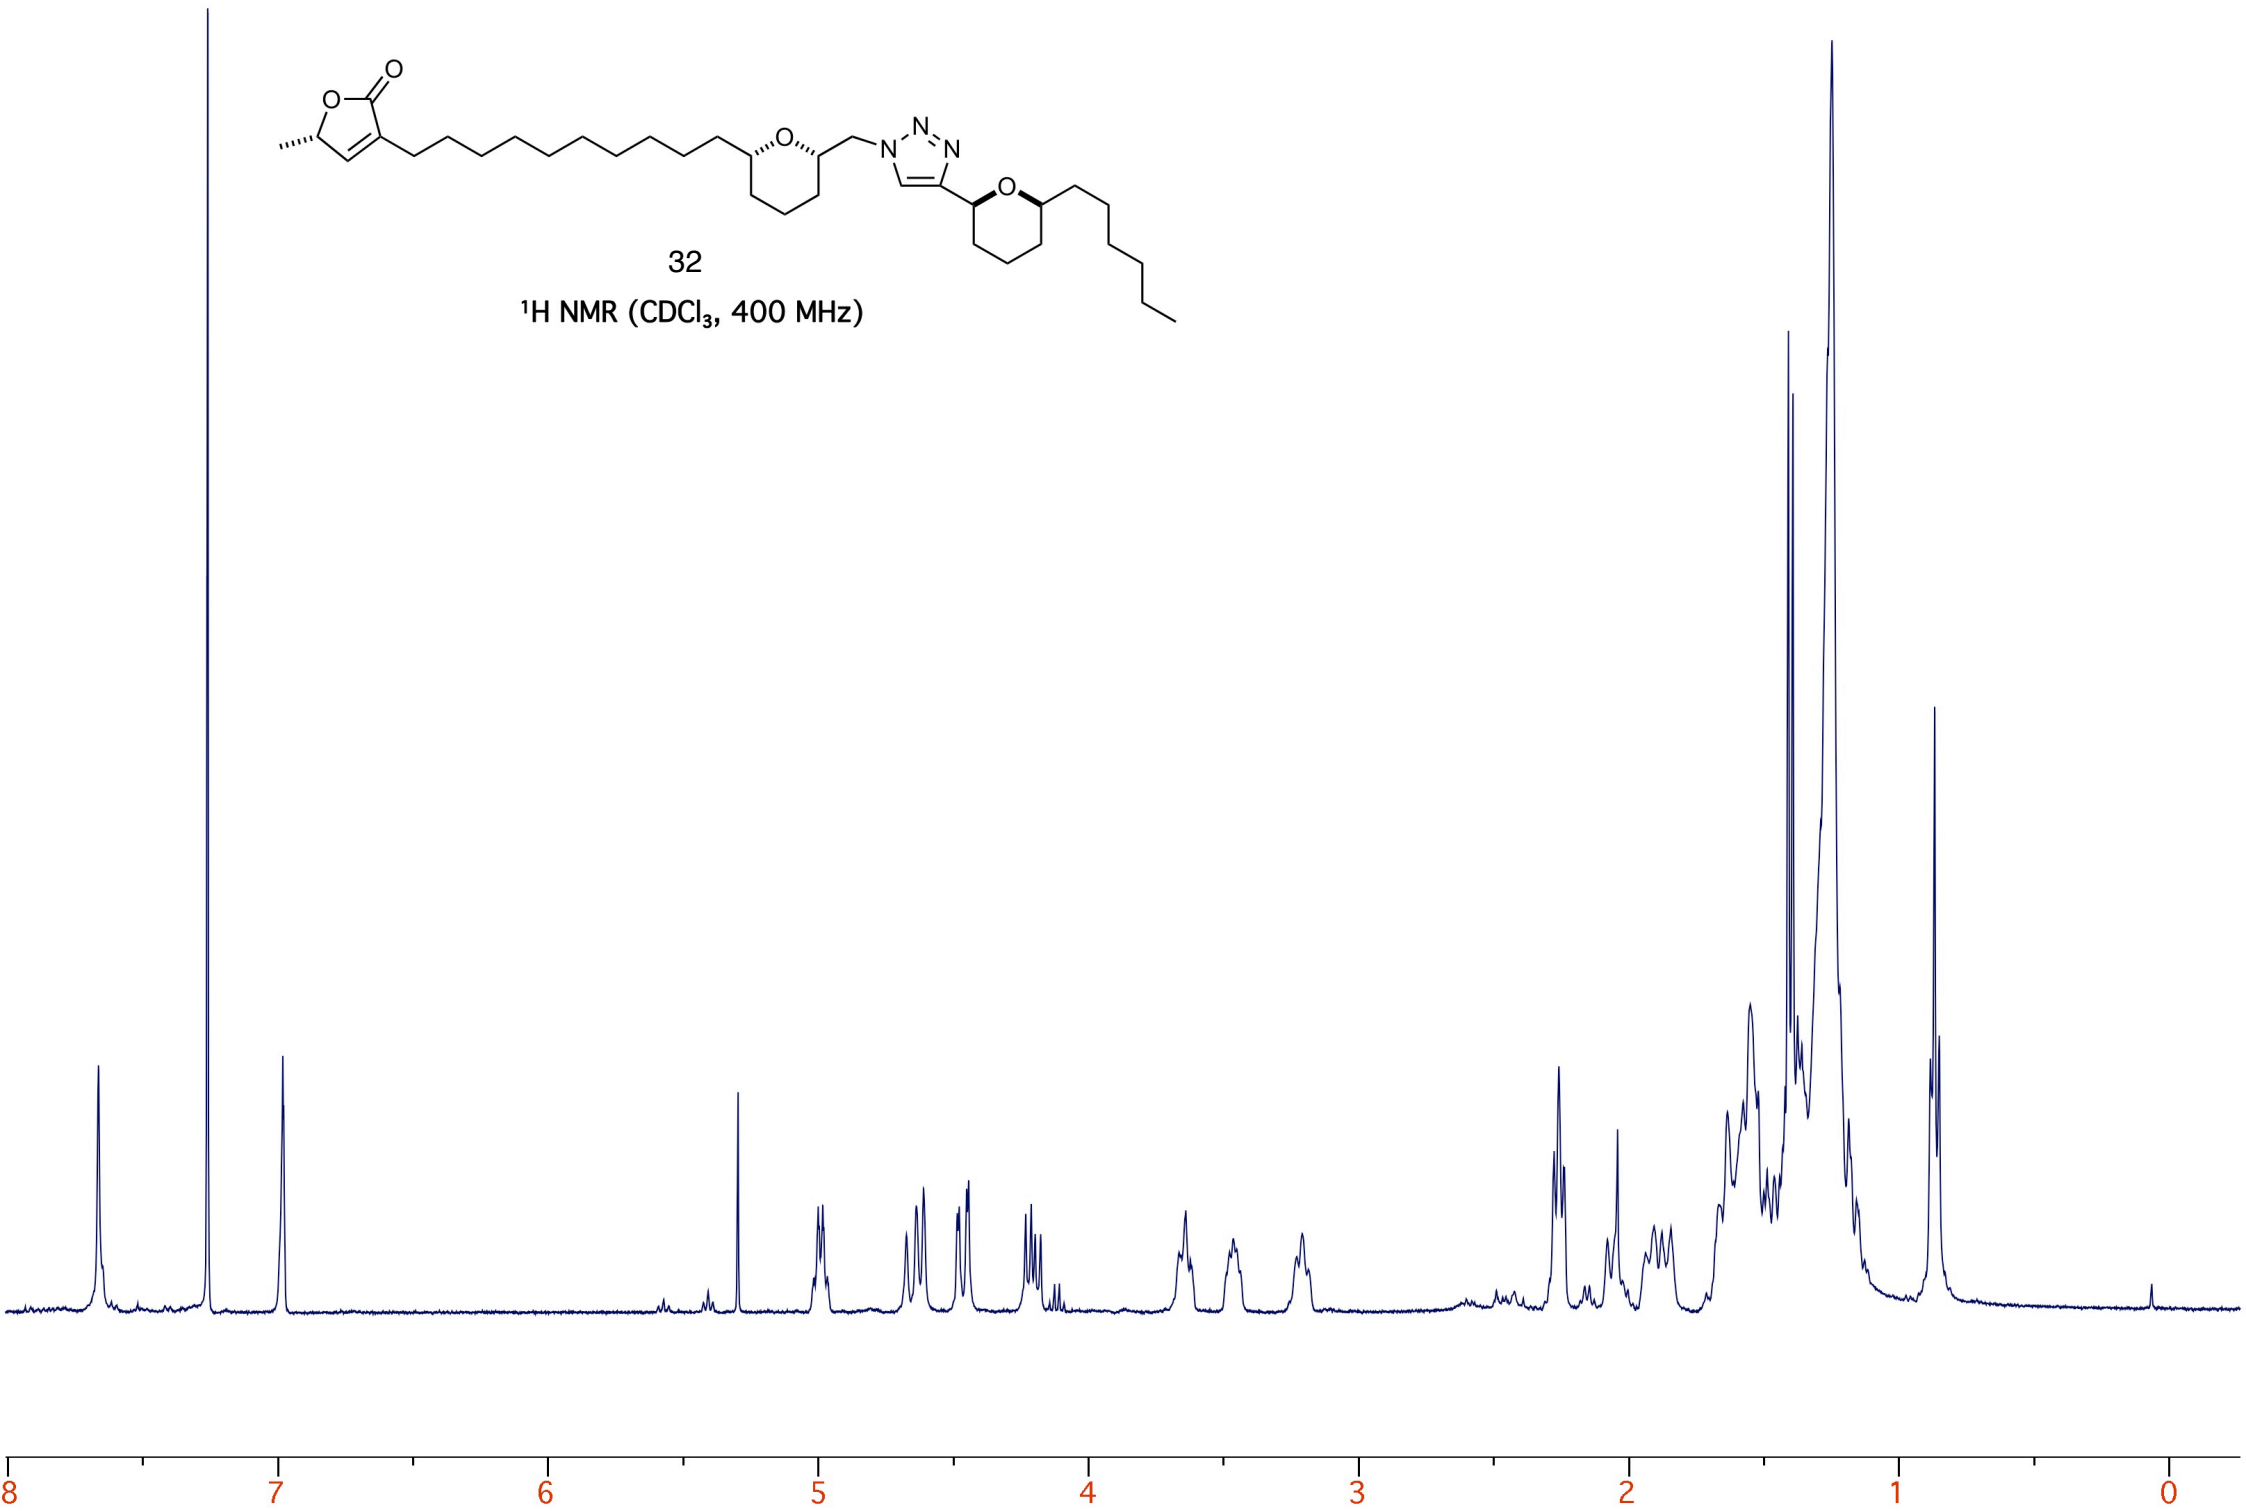

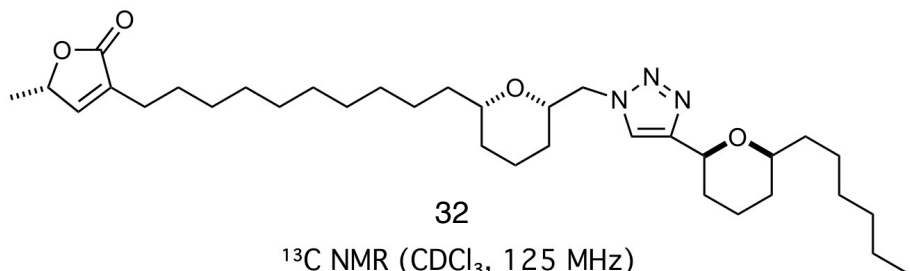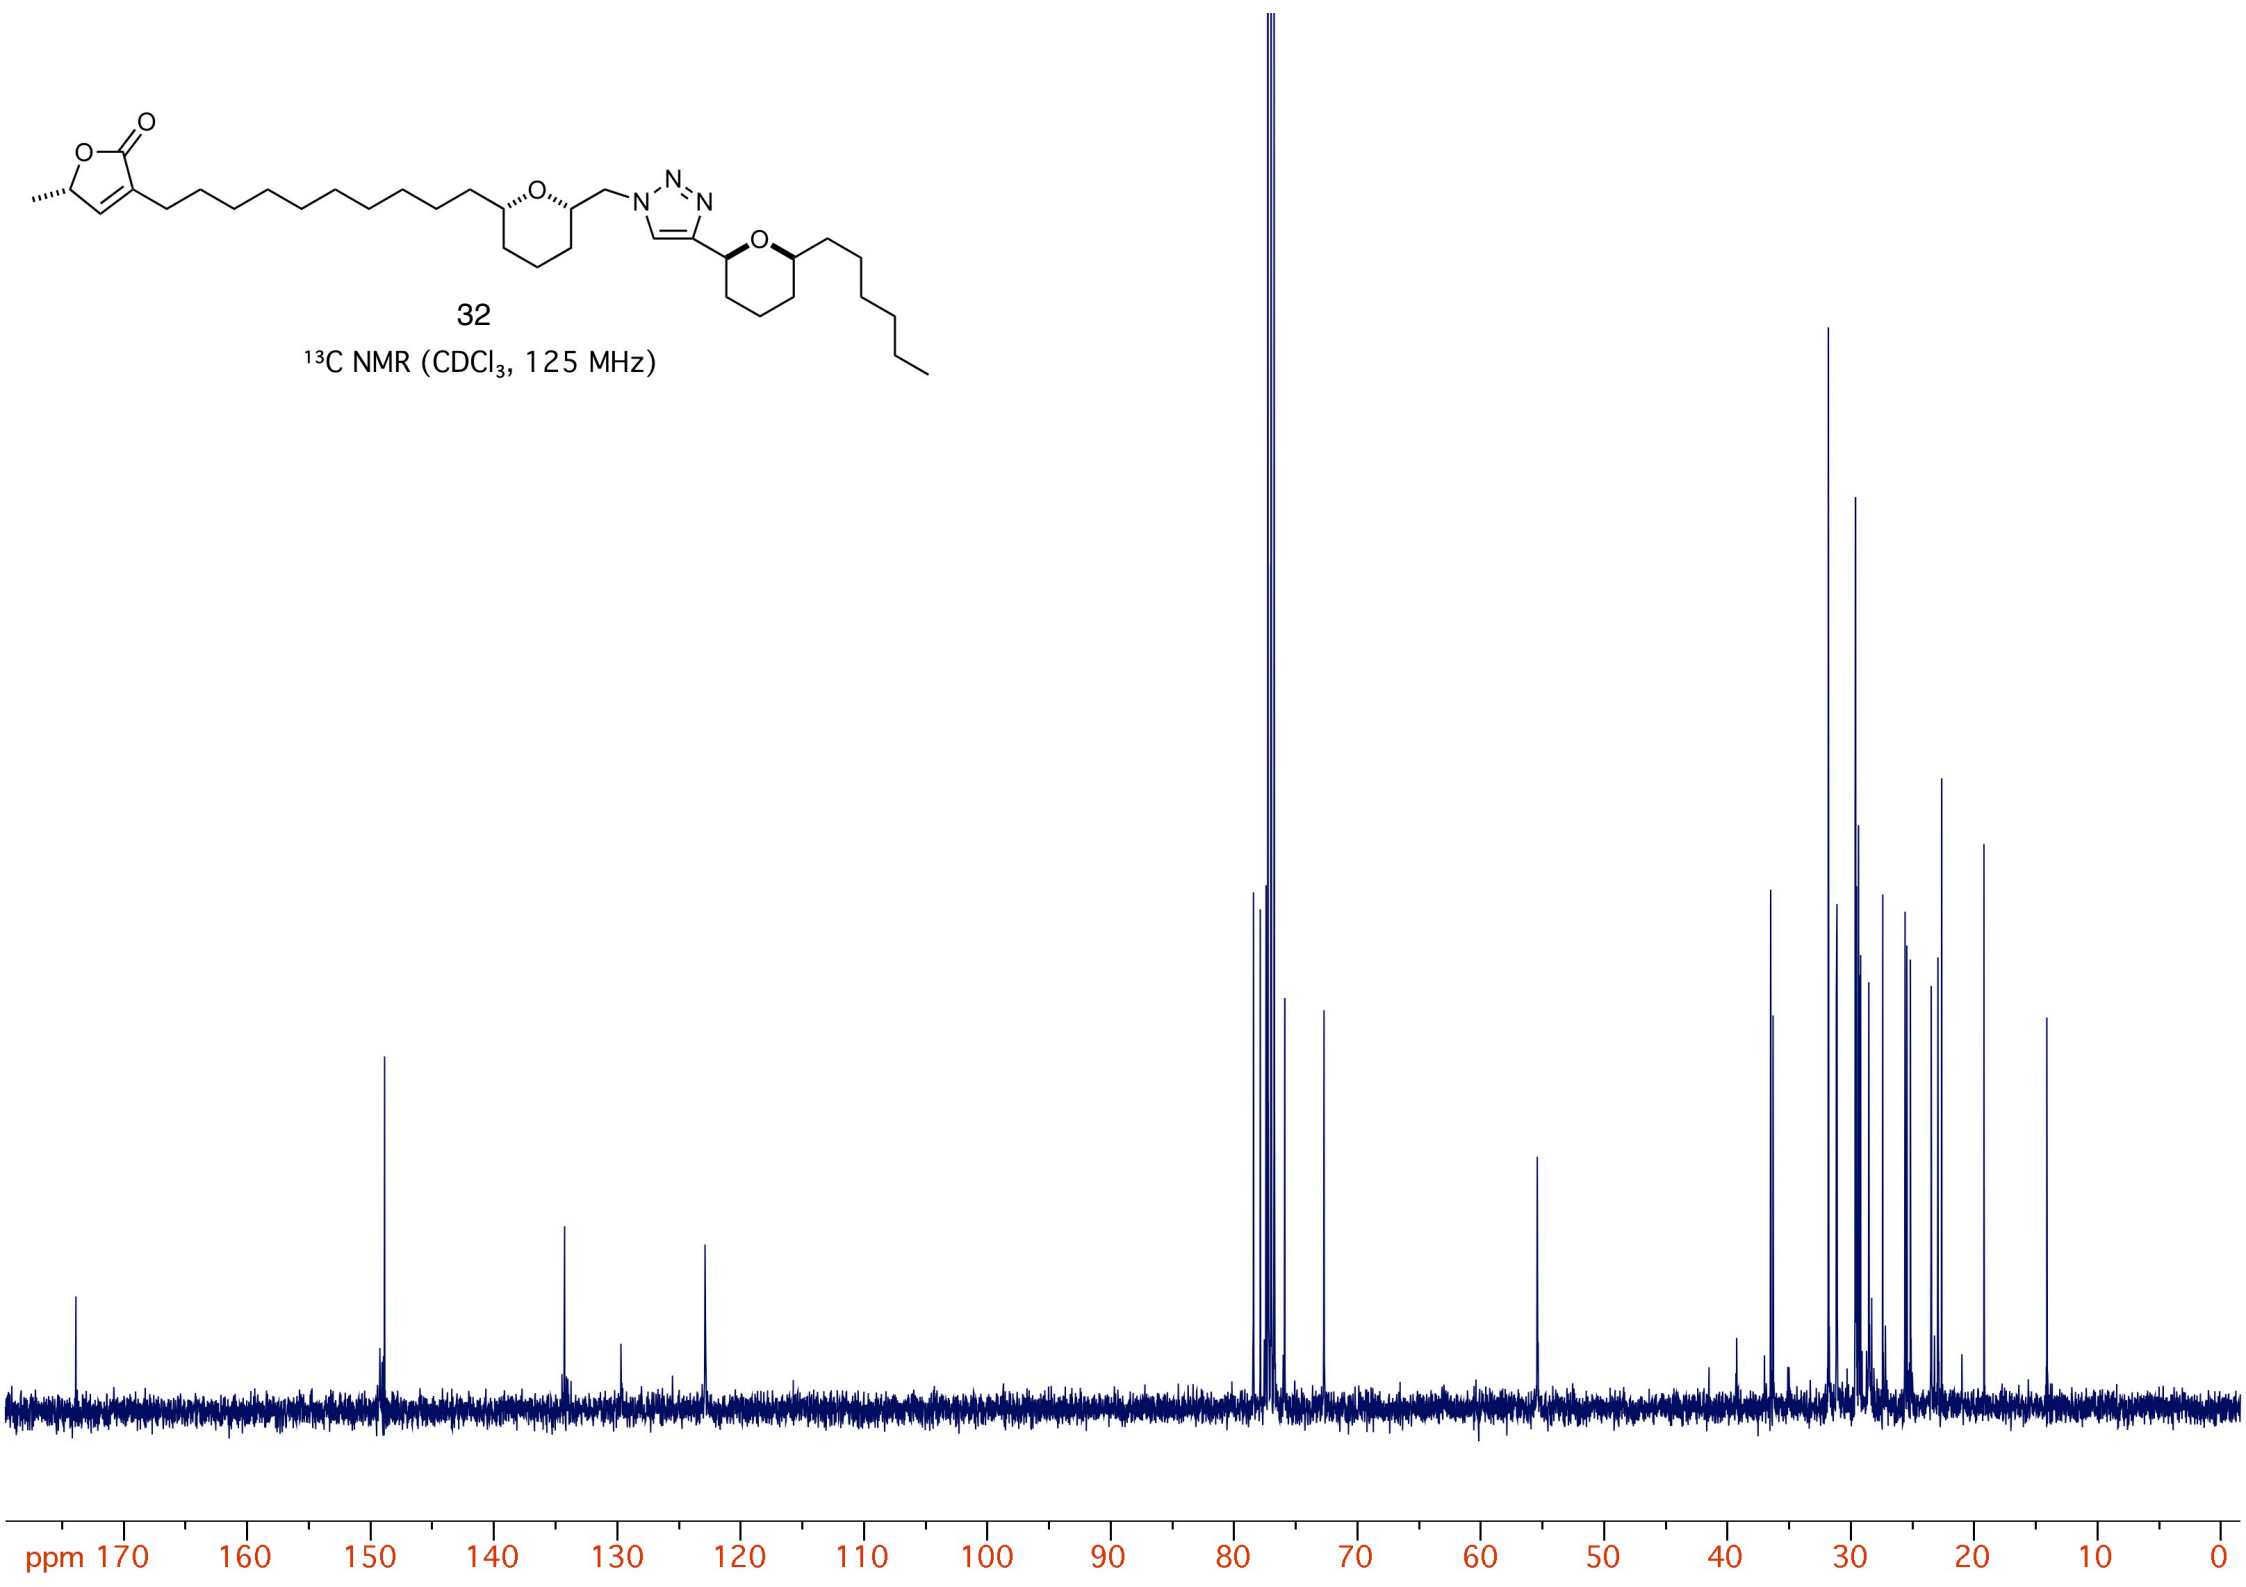

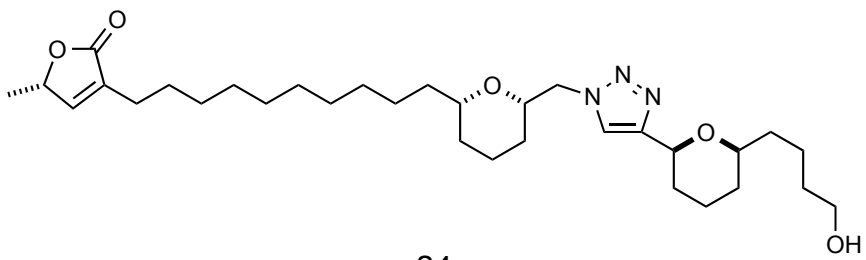

34  
<sup>1</sup>H NMR (CDCl<sub>3</sub>, 500 MHz)

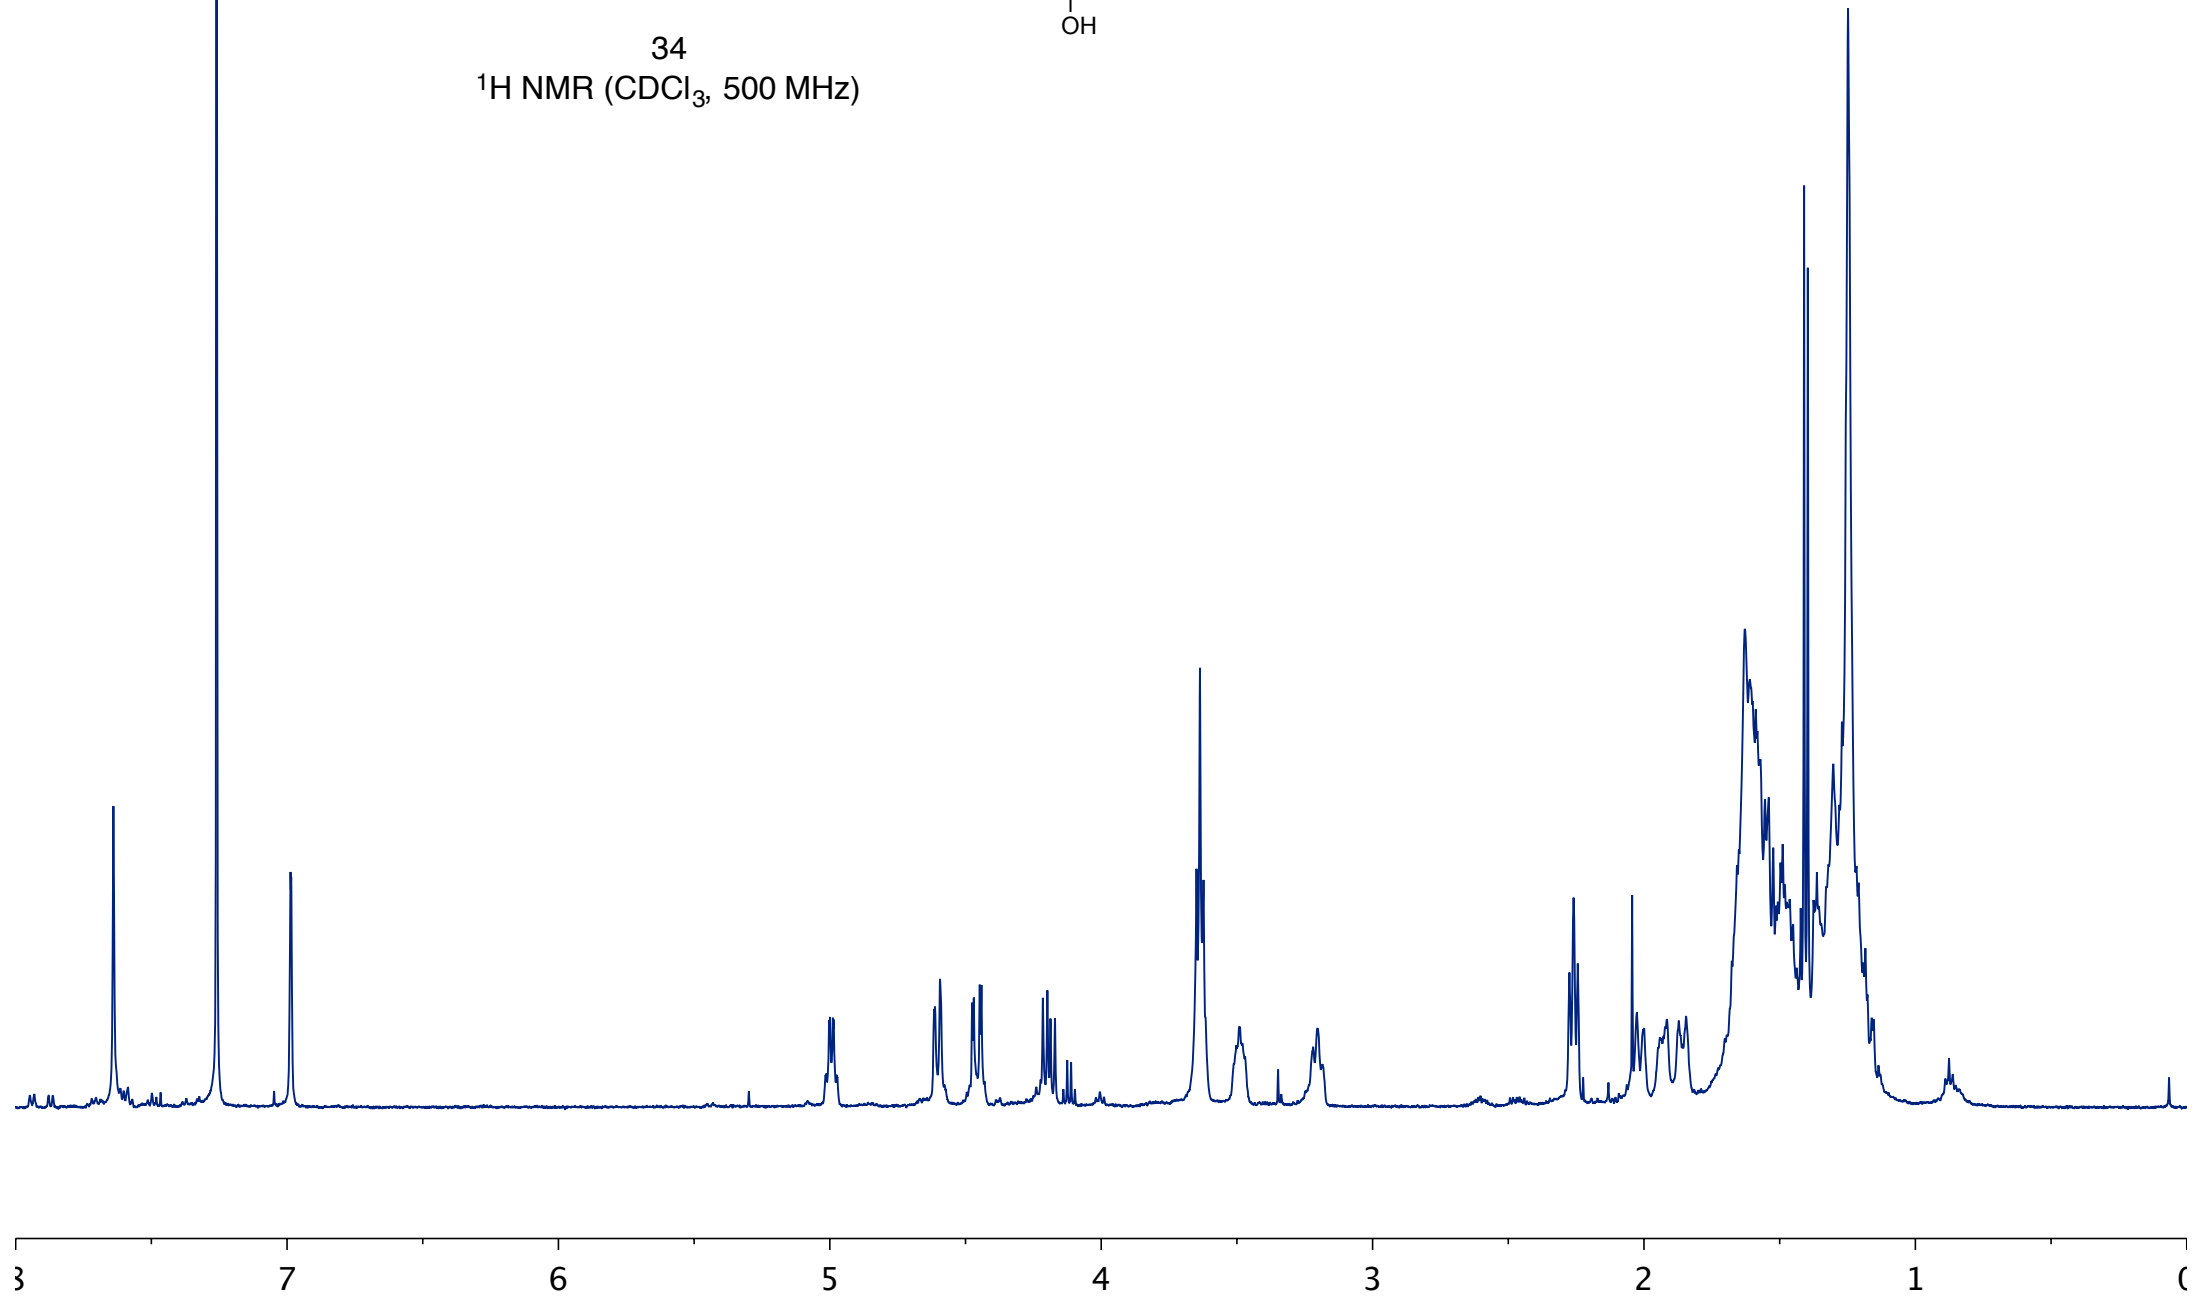

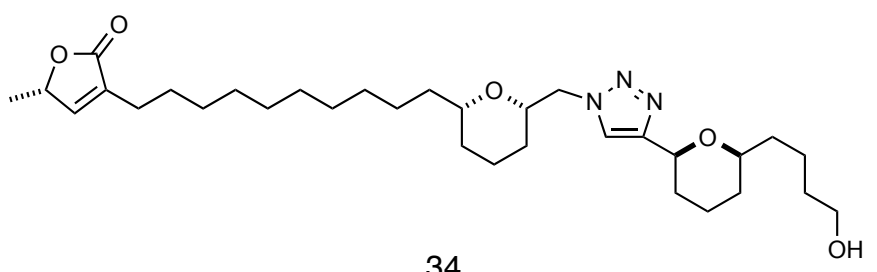

34  
<sup>13</sup>C NMR (CDCl<sub>3</sub>, 125 MHz)

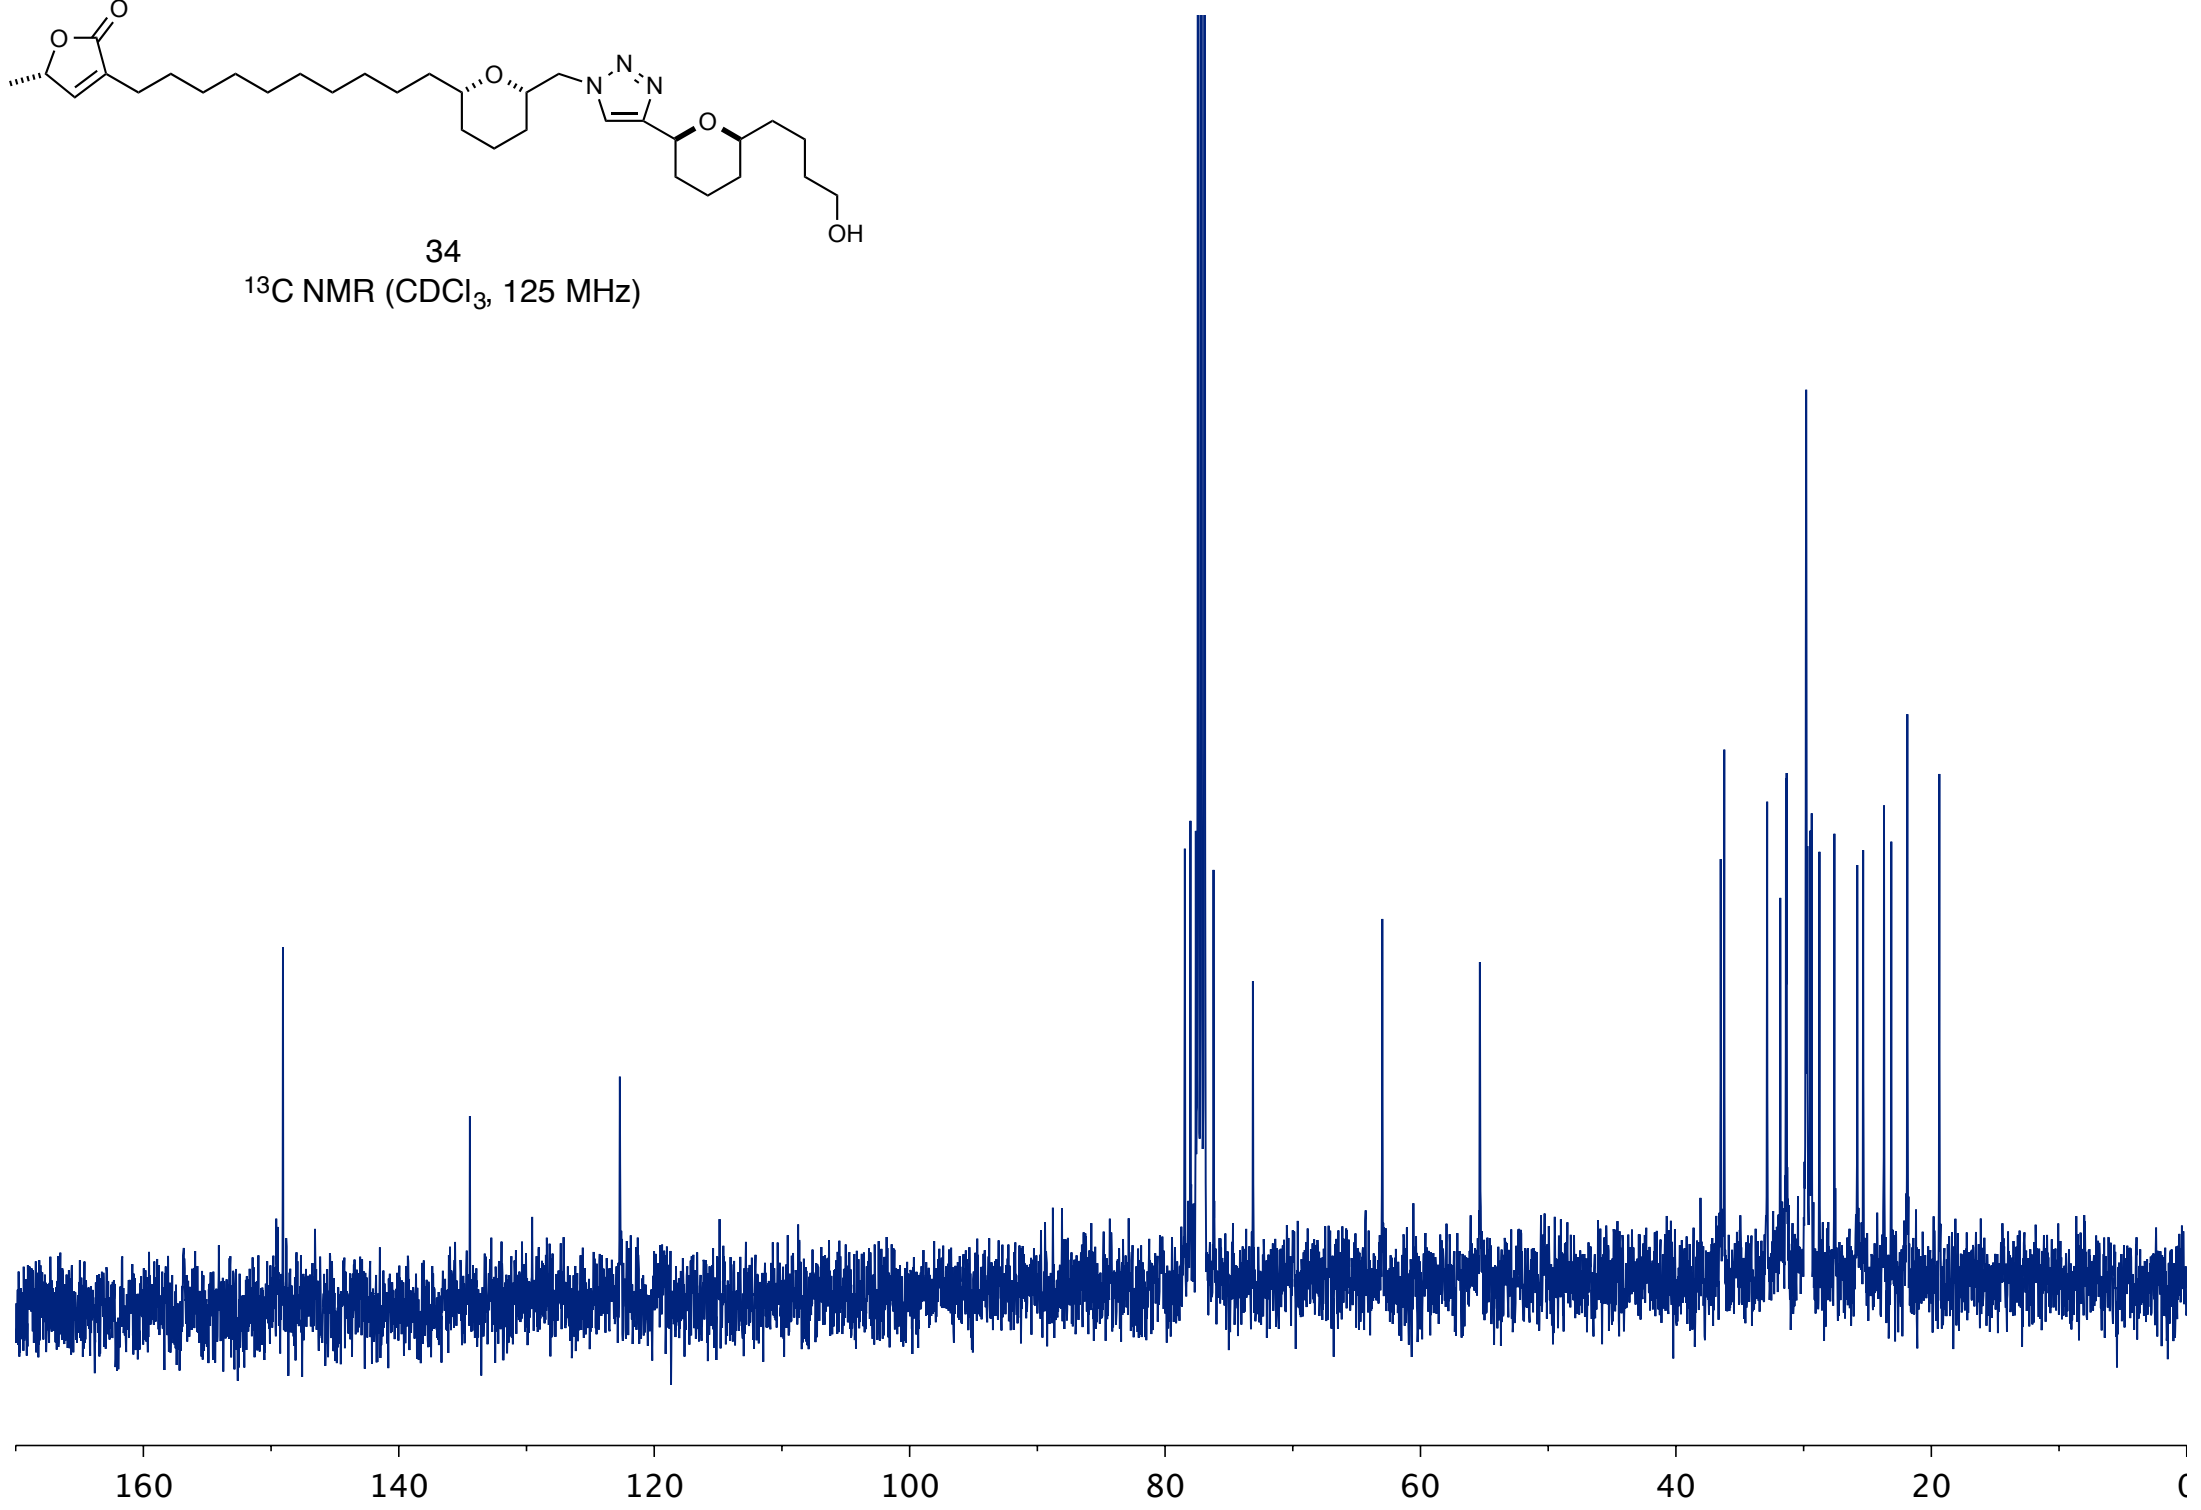

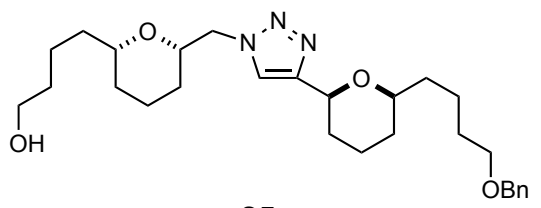

35

<sup>1</sup>H NMR (CDCl<sub>3</sub>, 300 MHz)

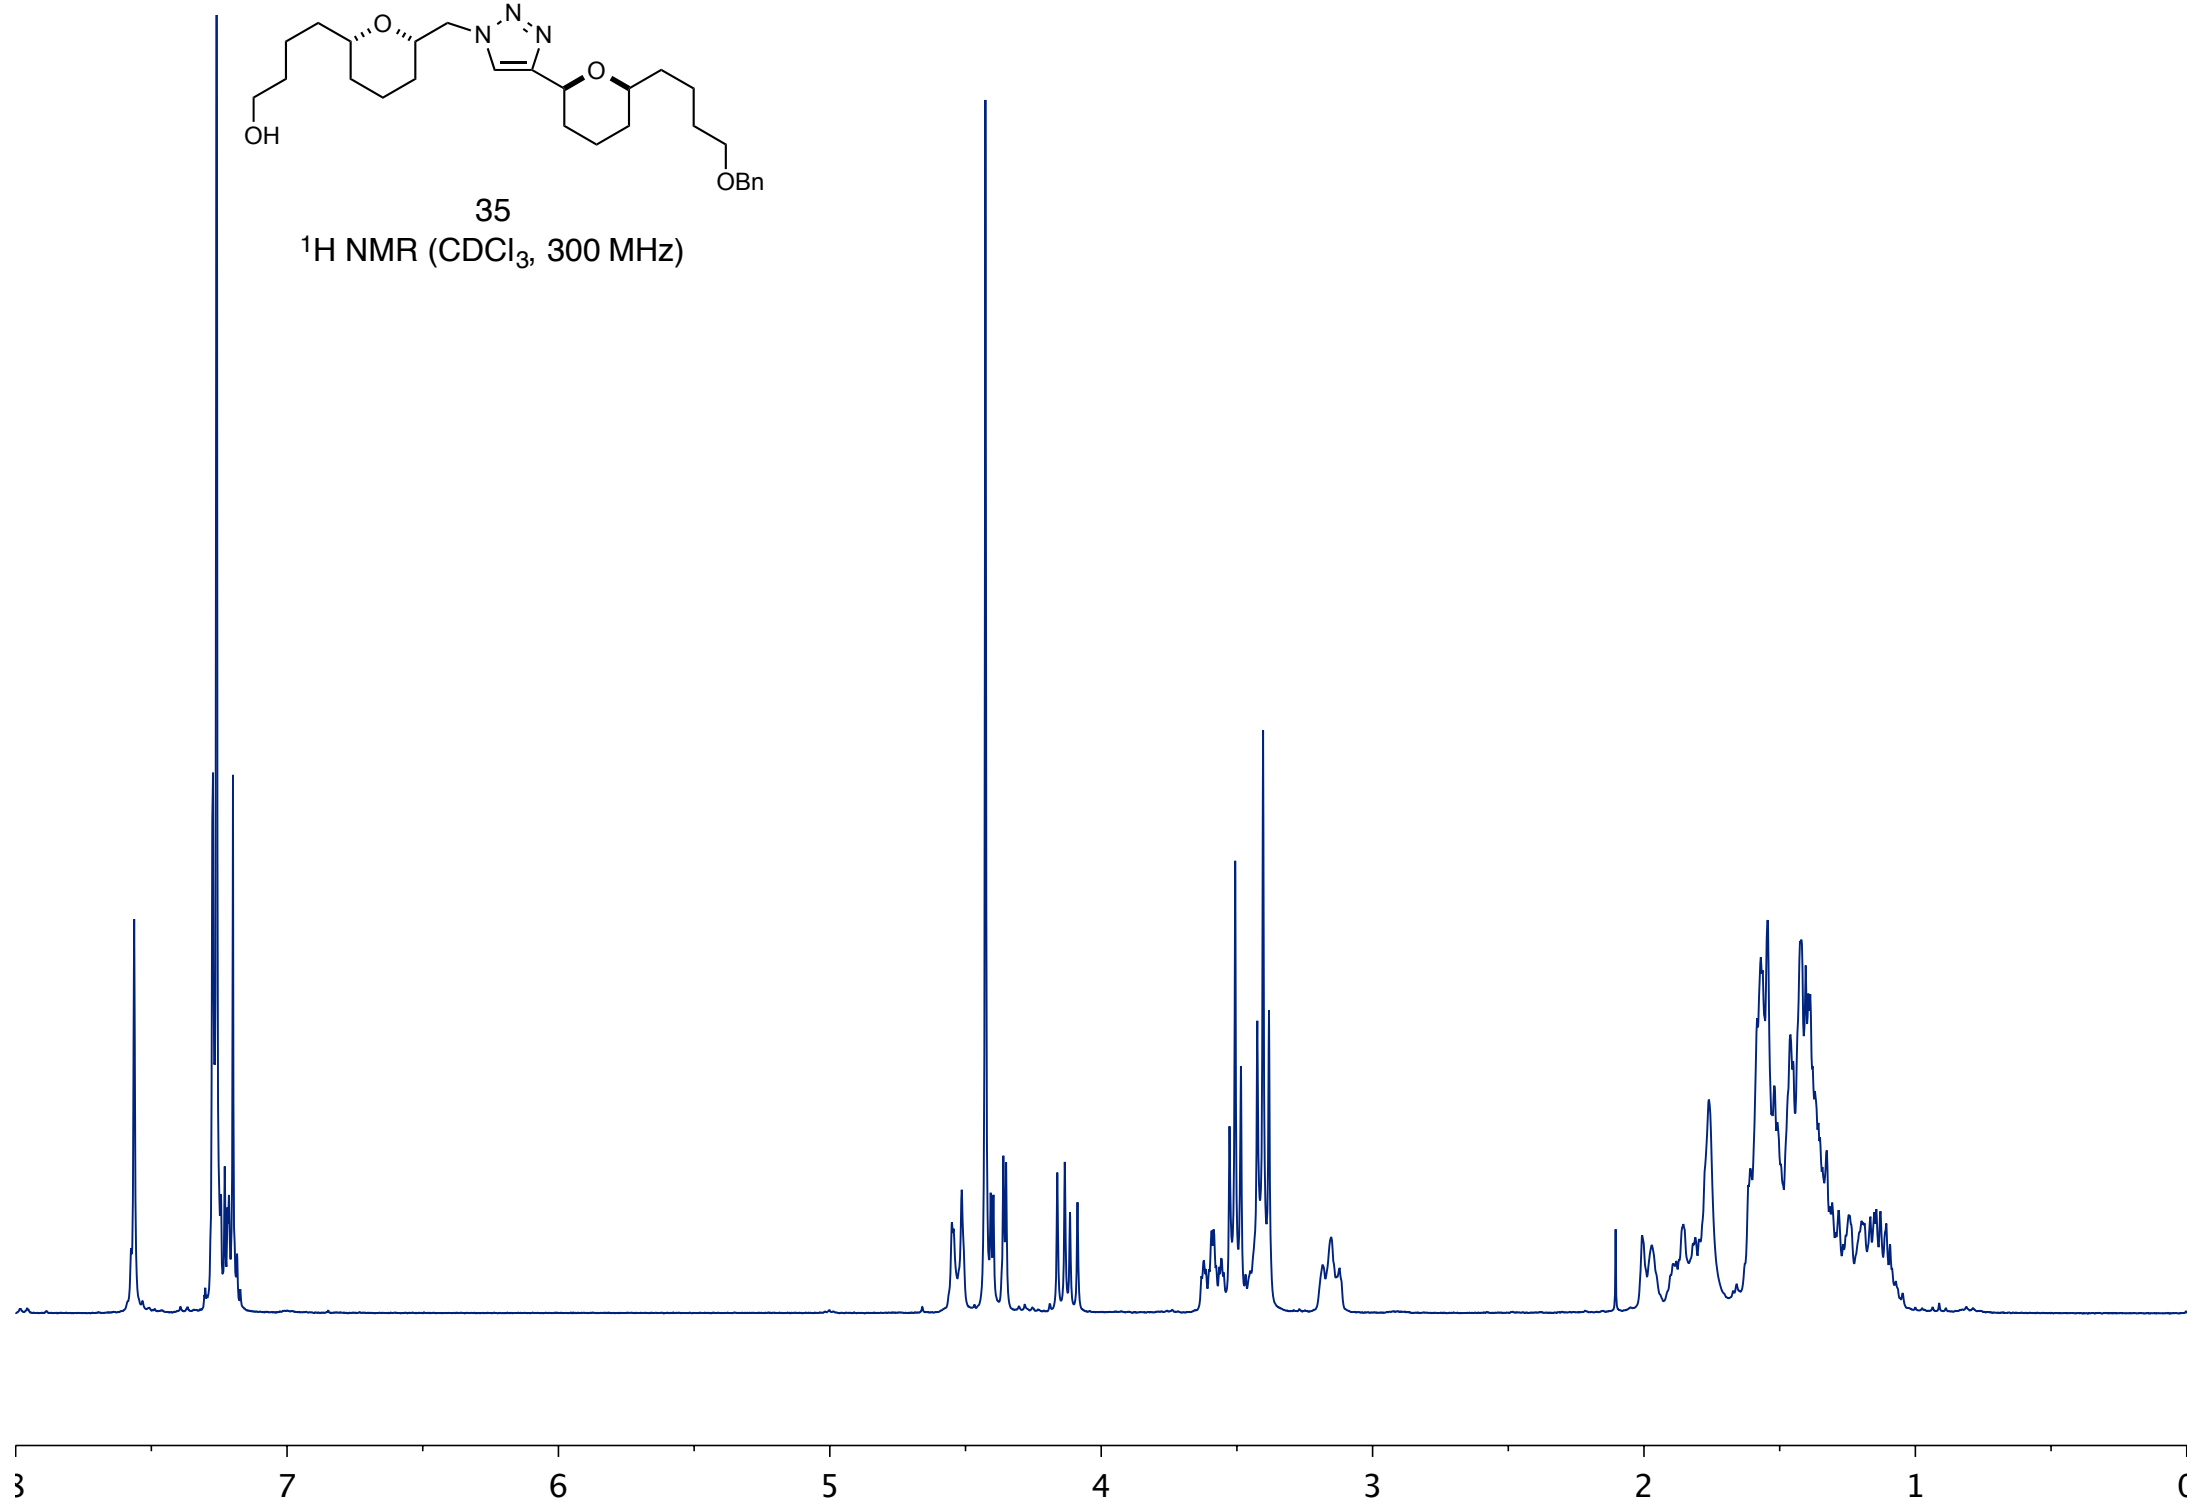

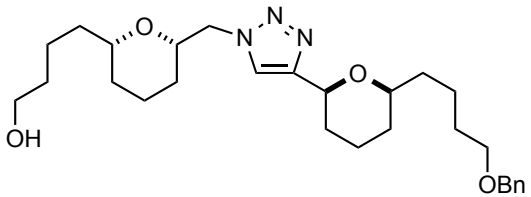

35

$^{13}\text{C}$  NMR ( $\text{CDCl}_3$ , 75 MHz)

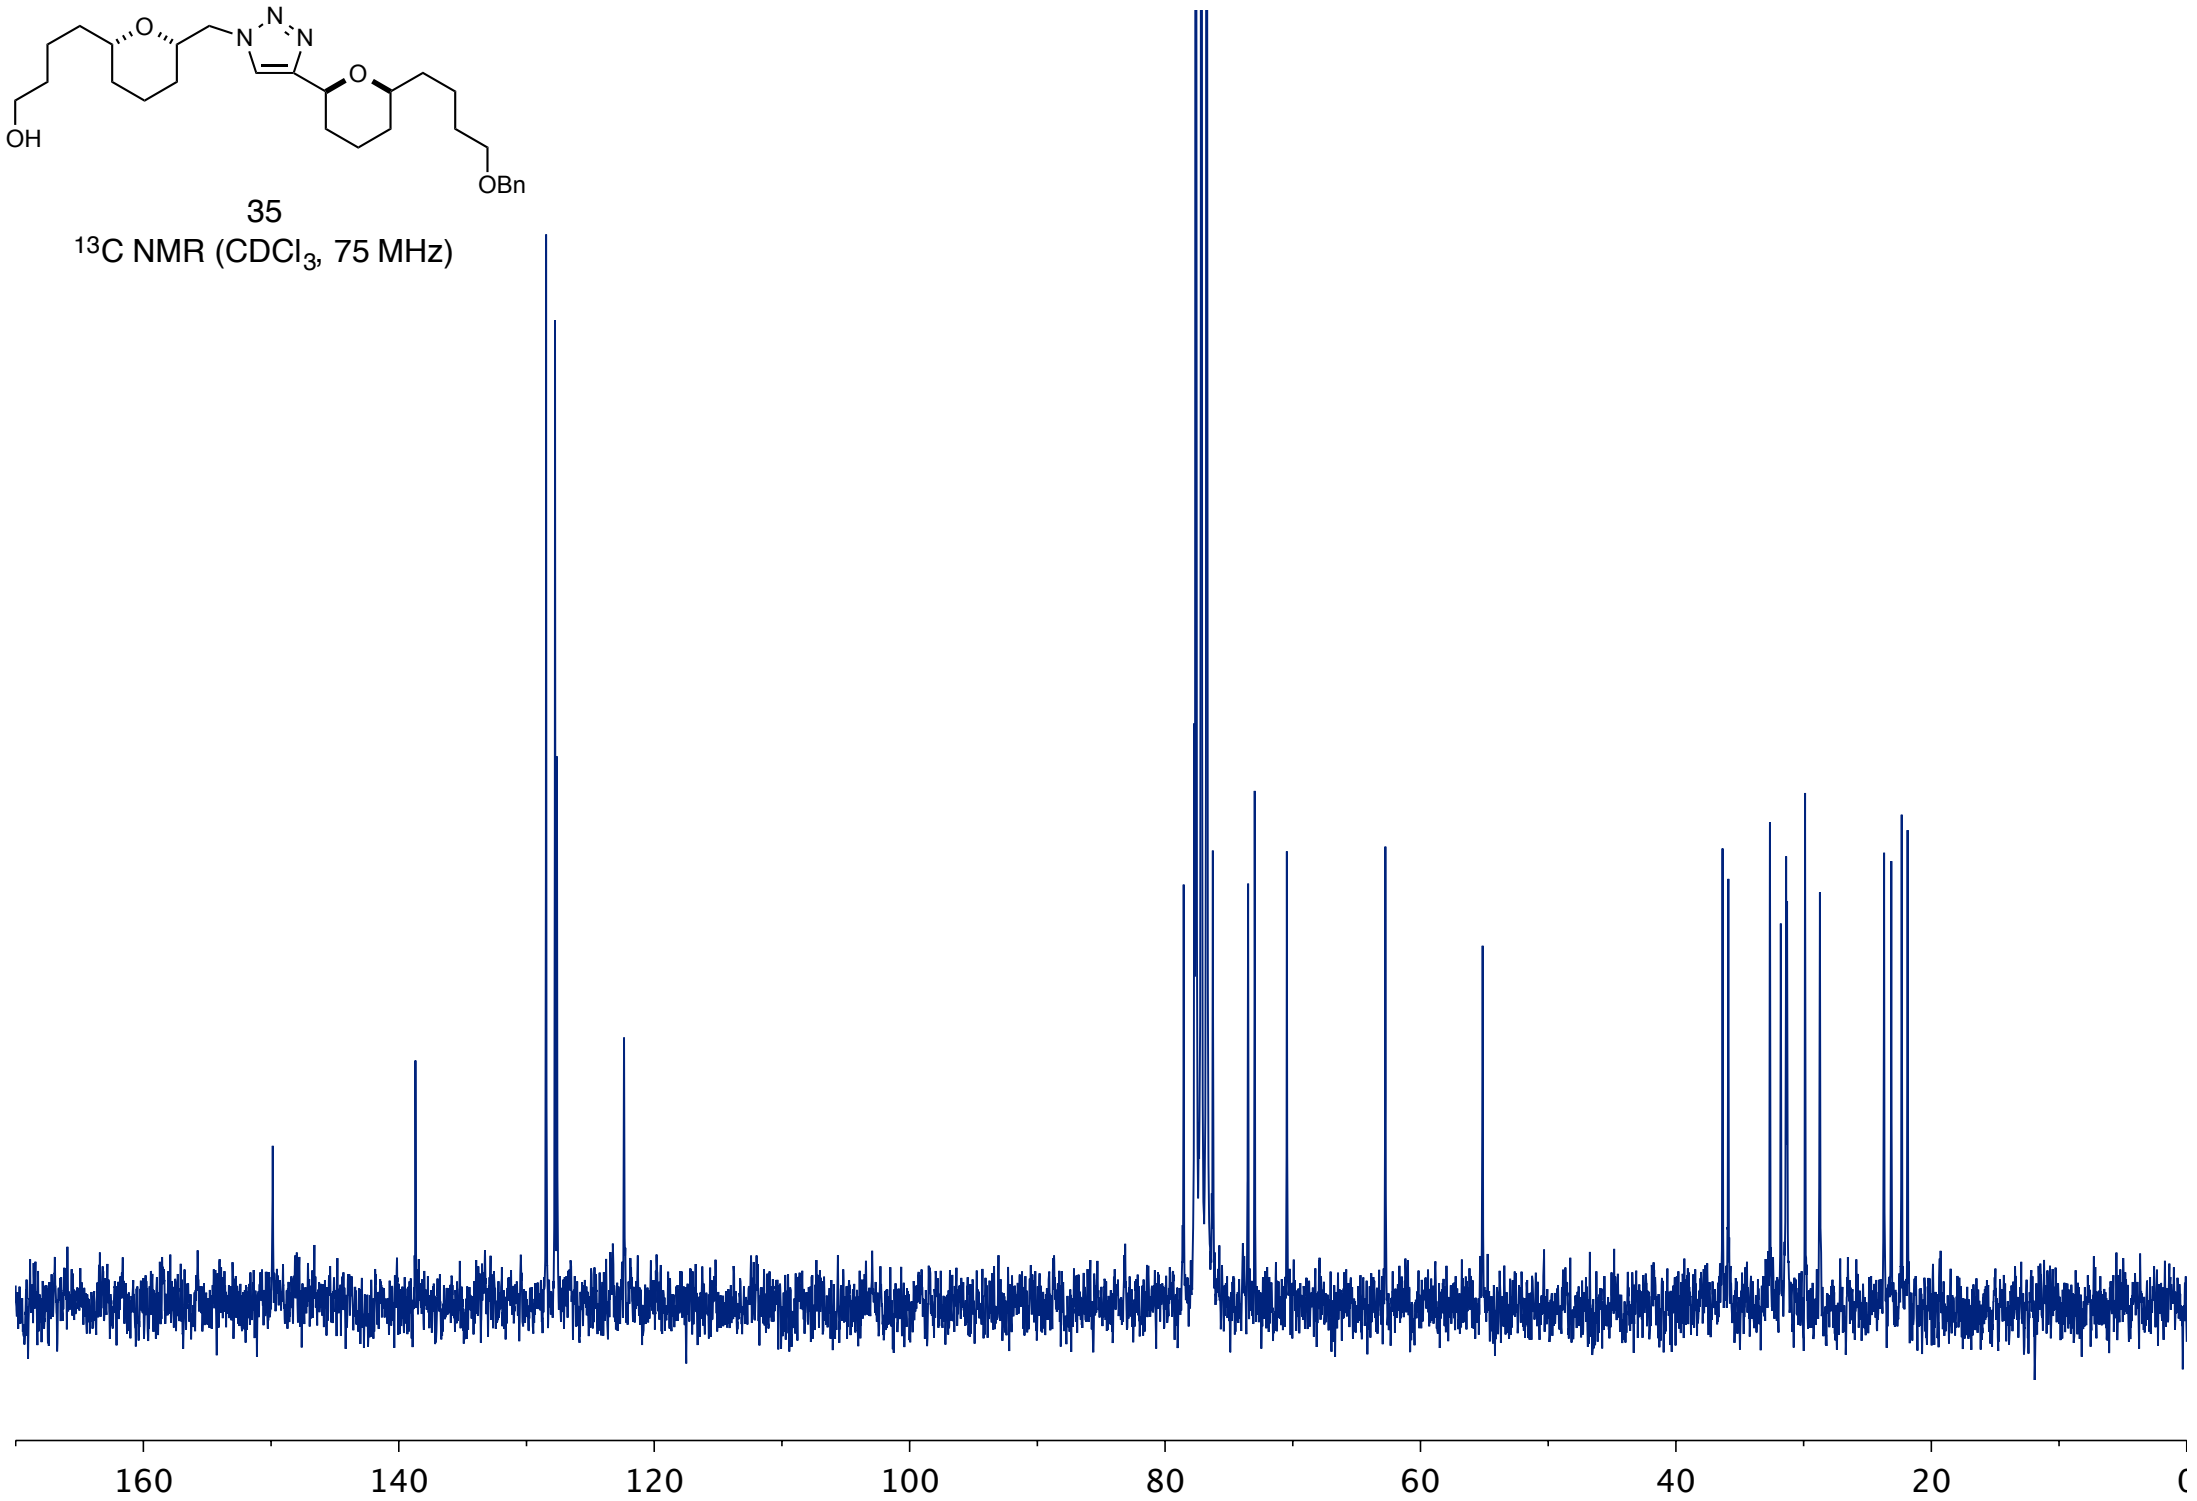

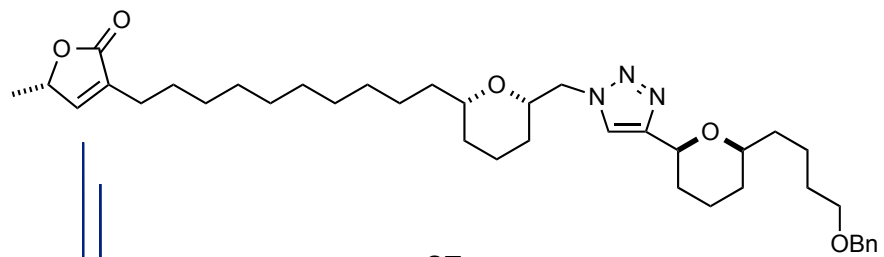

37  
<sup>1</sup>H NMR (CDCl<sub>3</sub>, 500 MHz)

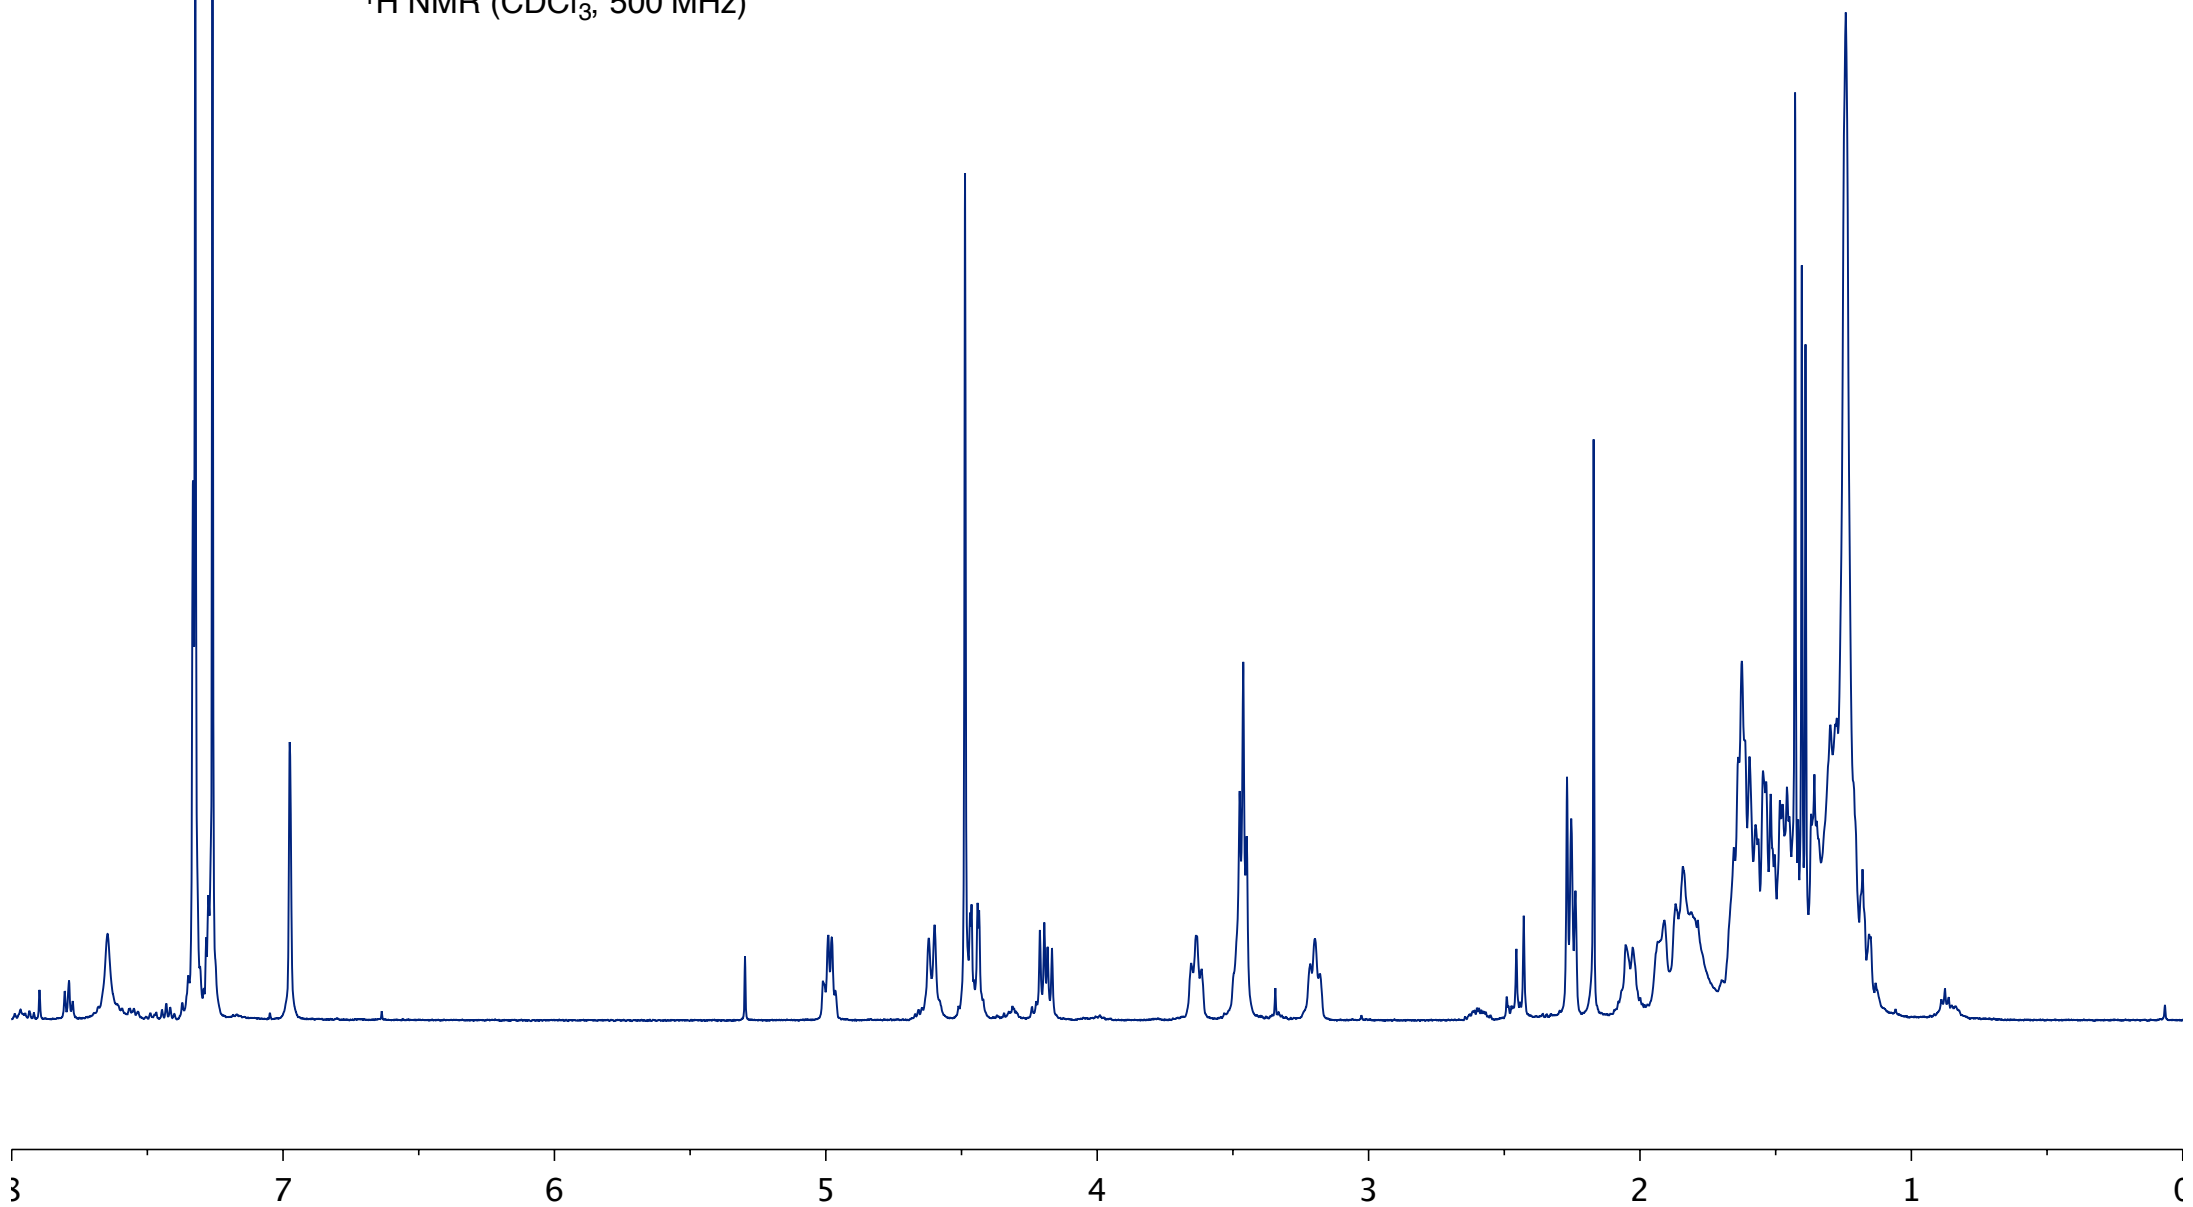

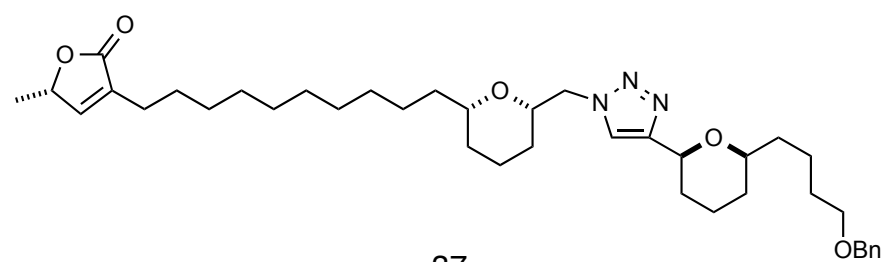

37

$^{13}\text{C}$  NMR ( $\text{CDCl}_3$ , 125 MHz)

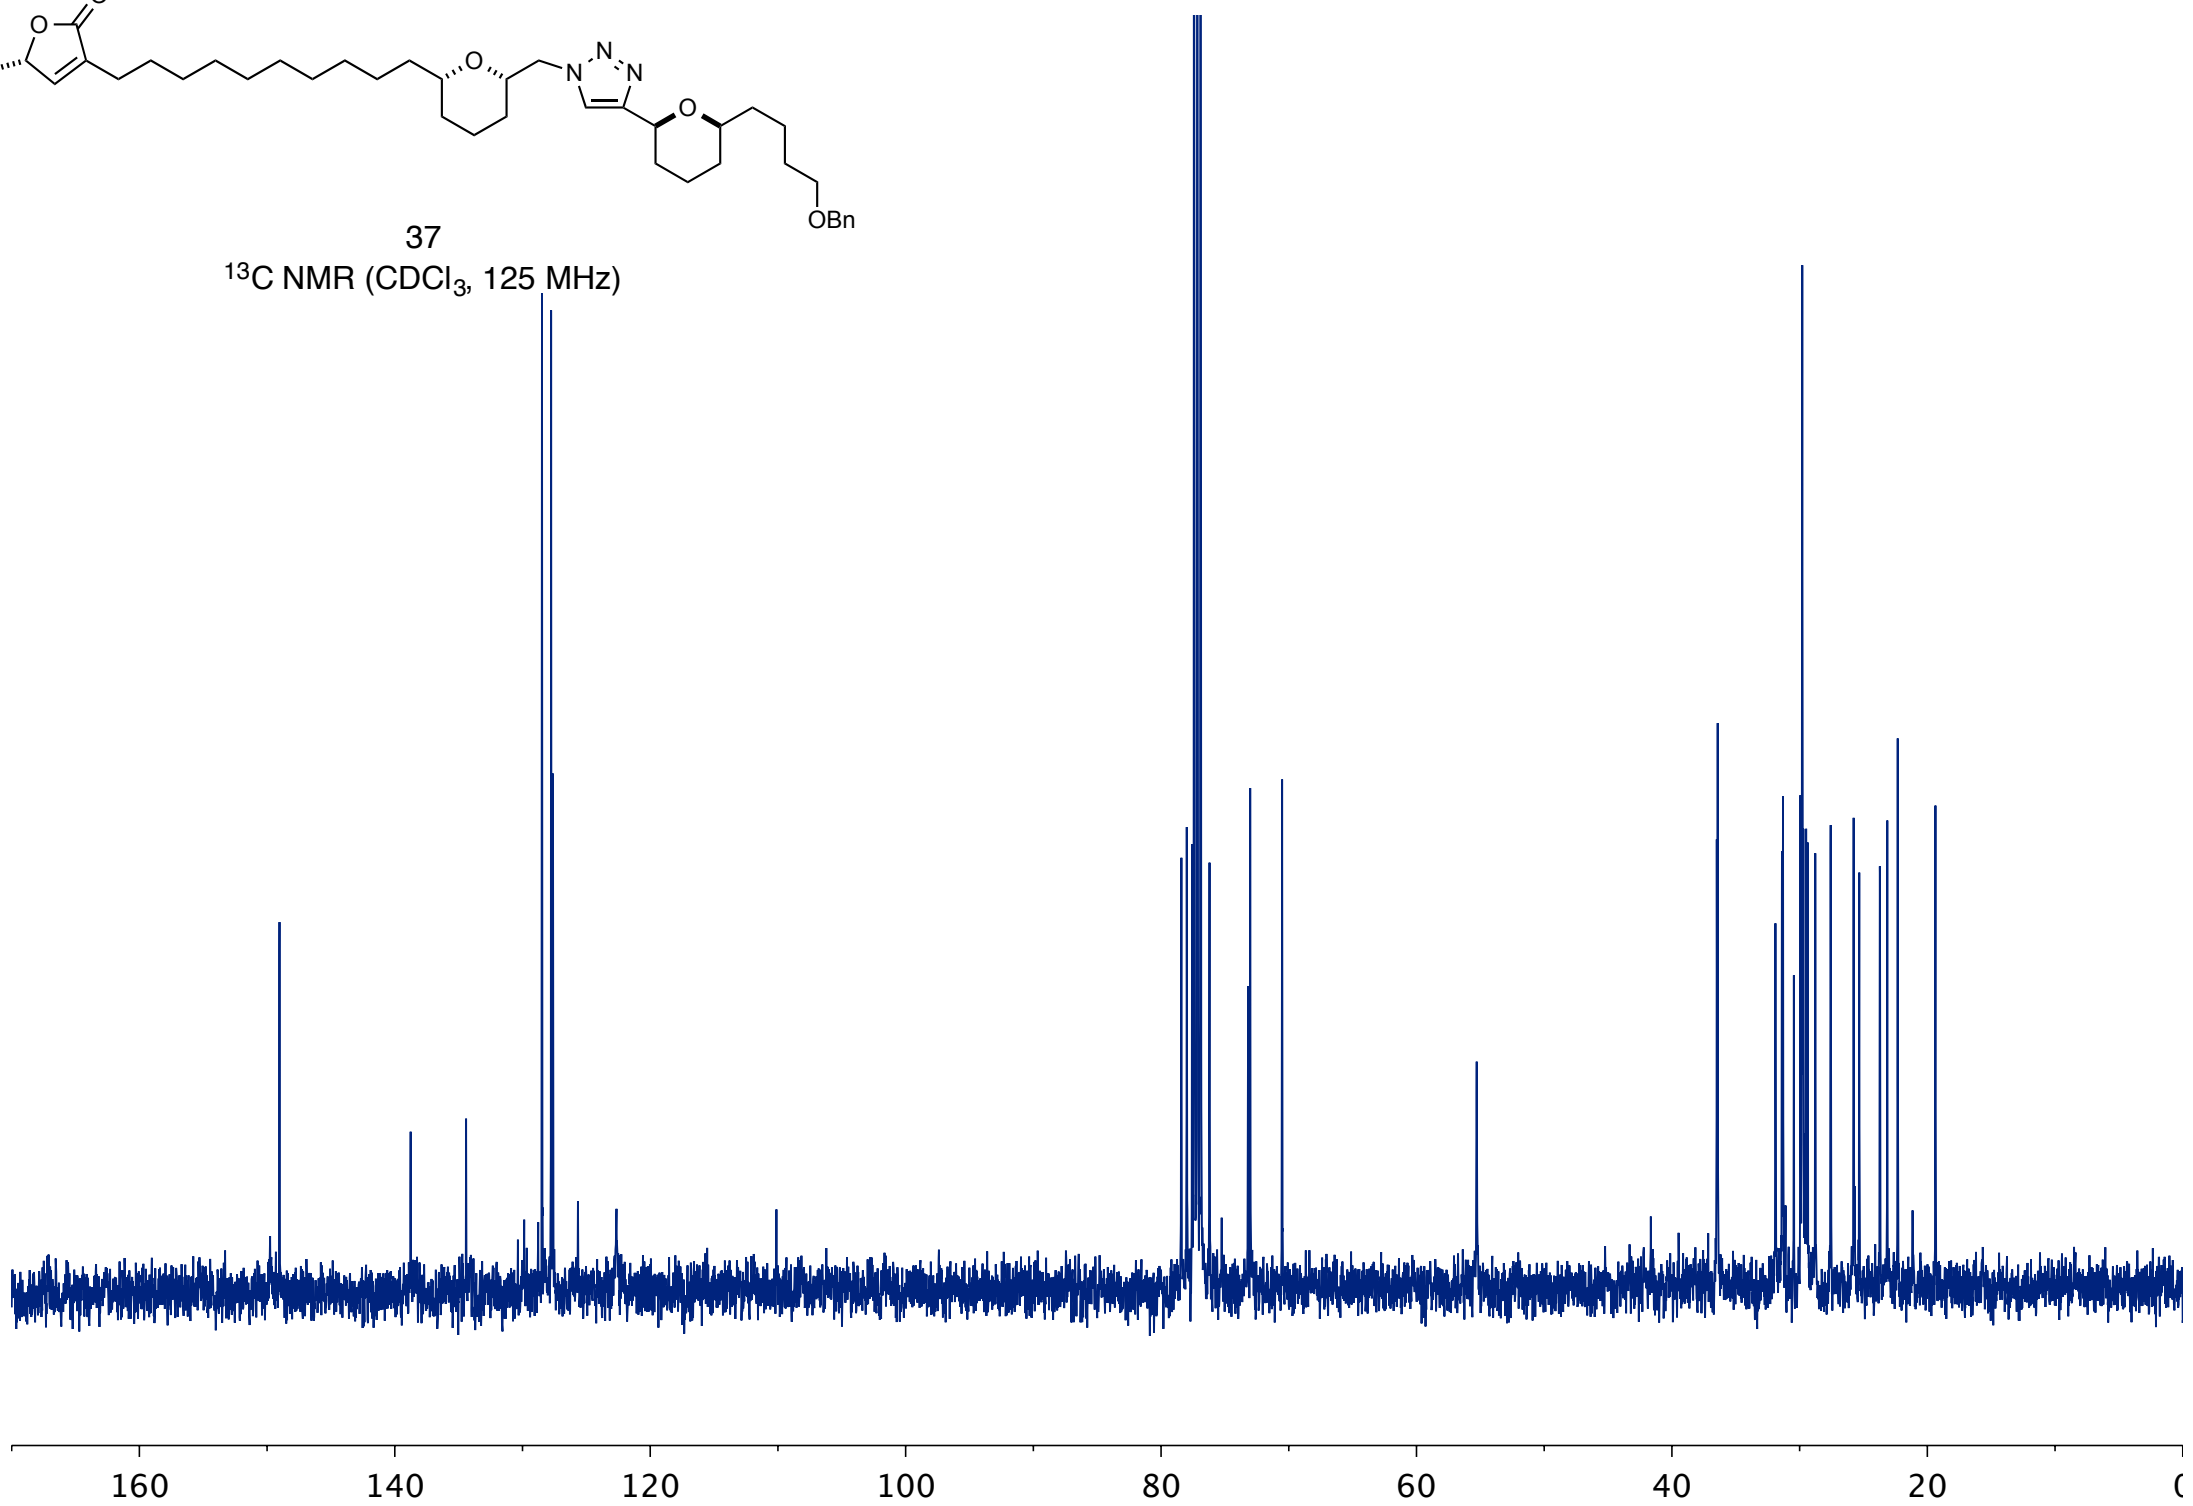



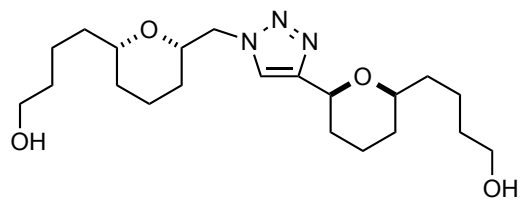

38

$^1\text{H}$  NMR ( $\text{CDCl}_3$ , 400 MHz)

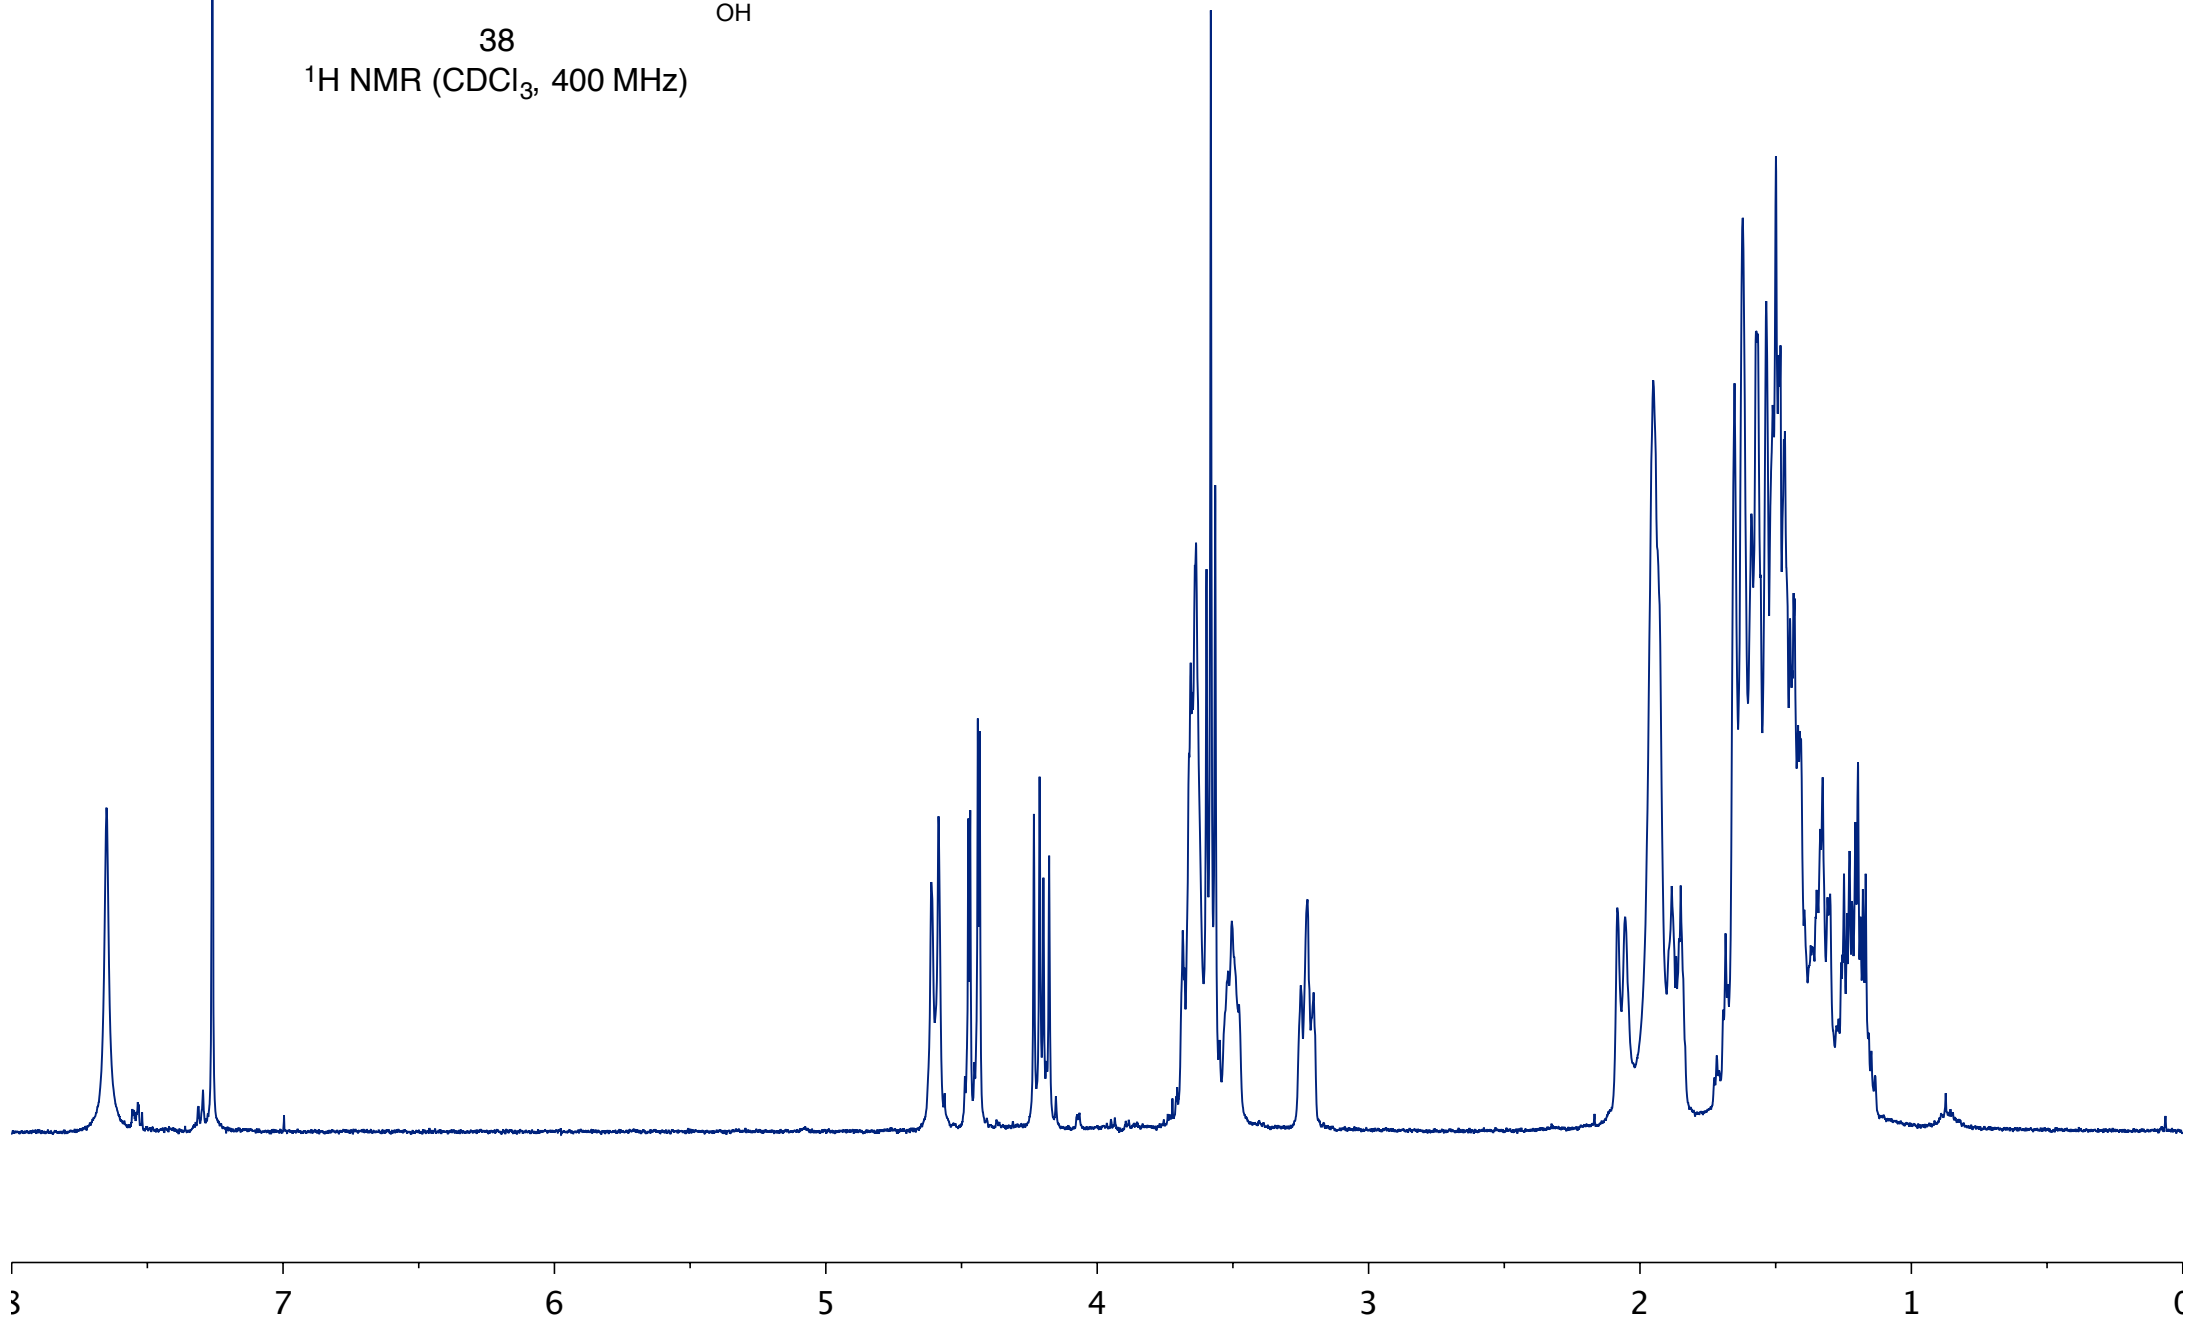

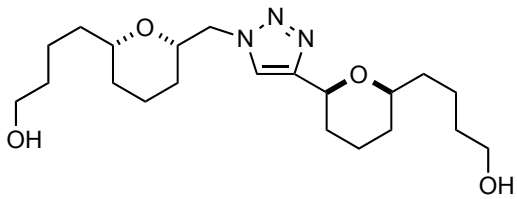

38

$^{13}\text{C}$  NMR ( $\text{CDCl}_3$ , 125 MHz)

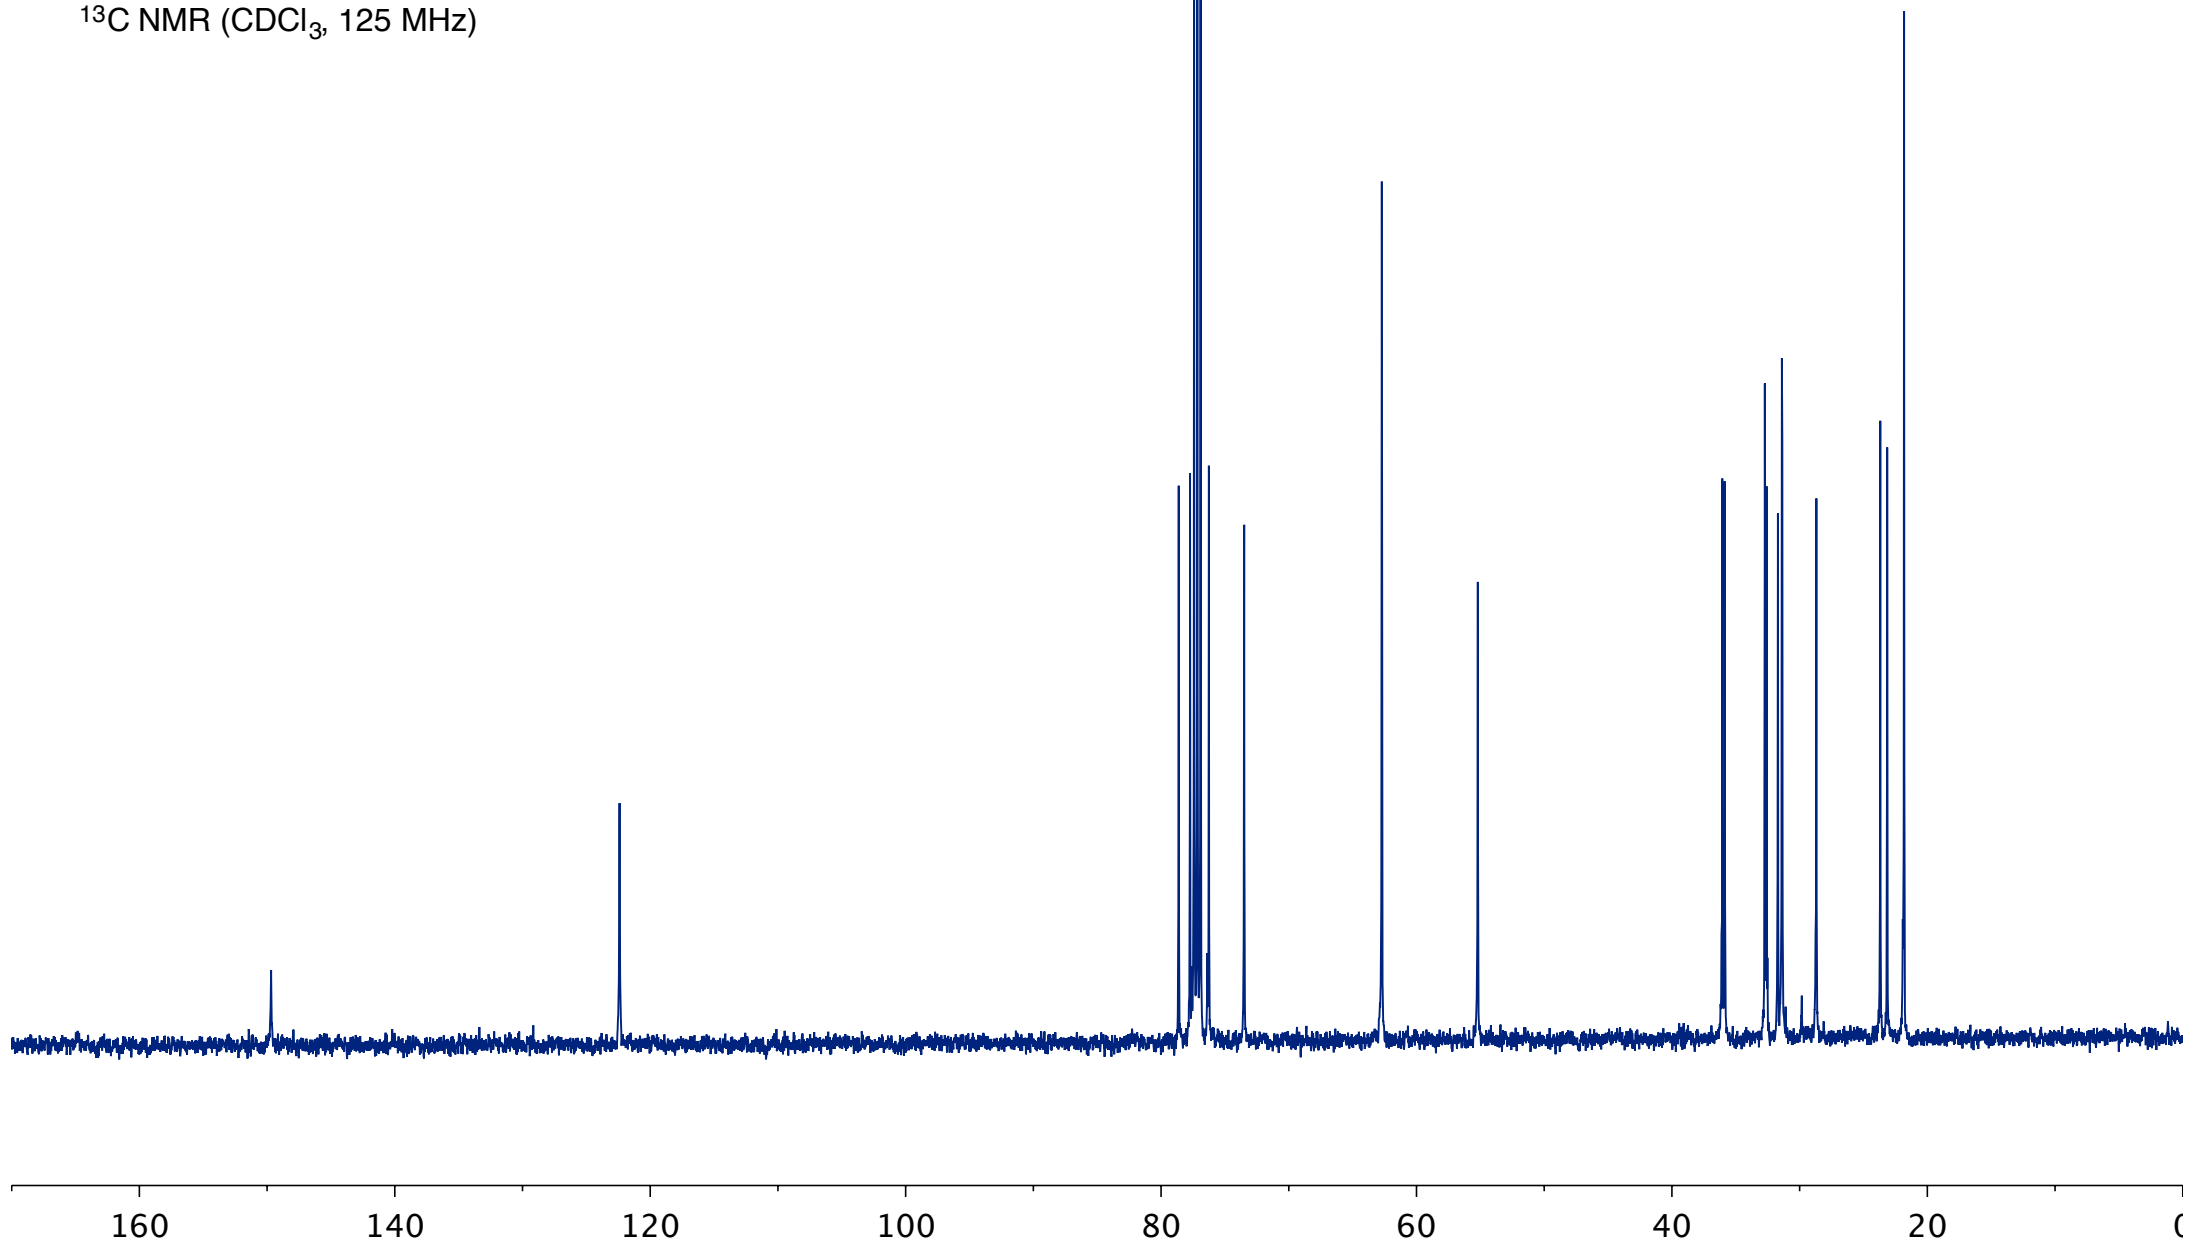

Supplement: NIHMS61699-supplement-SUPPL.pdf [file NIHMS61699-supplement-SUPPL.pdf]
